# Supplementary material for: Actin-regulated Siglec-1 nanoclustering influences HIV-1 capture and virus-containing compartment formation in dendritic cells
Source: eLife journal article supplement (doi:10.7554/elife.78836), 2023-03-20
Supplement: fig1-data1 [file Figure 1-source data 1.xlsx]

## Sheet: Figure 1B
Figure 1B	iDC
Nº of molecules per spot	Experiment 1	Experiment 2	Experiment 3	Experiment 4	average	SEM
1	0.4615	0.4199	0.6567	0,7634B4B5:E5	0.5127	0.0632152
2	0.5254	0.4444	0.3296	0.1846	0.371	0.0739853
3	5.66e-07	0.1356	2.43e-05	0.0269	0.0406312	0.0322844
4	0.0132	5.1e-06	0.013776	0.025	0.0129953	0.00511134
Sample size	Values correspond to all siglec-1 spots analysed in 11 cells	Values correspond to all siglec-1 spots analysed in 16 cells	Values correspond to all siglec-1 spots analysed in 13 cells	Values correspond to all siglec-1 spots analysed in 9 cells
Figure 1B	mDC
Nº of molecules per spot	Experiment 1	Experiment 2	Experiment 3	Experiment 4	average	SEM
1	0.1654	0.1877	0.3727	0.1702	0.224	0.0995955
2	0.8269	0.454	0.4762	0.5521	0.5773	0.171619
3	2.31e-06	0.2385	0.0698	0.1084	0.104176	0.100158
4	0.00771	0.119802	0.081303	0.1692	0.0945037	0.0681345
Sample size	Values correspond to all siglec-1 spots analysed in 11 cells	Values correspond to all siglec-1 spots analysed in 16 cells	Values correspond to all siglec-1 spots analysed in 16 cells	Values correspond to all siglec-1 spots analysed in 10 cells
Table Analyzed	FIGURE 1B Two way ANOVA
Two-way RM ANOVA	Matching: Across row
Assume sphericity?	Yes
Alpha	0.05
Source of Variation	% of total variation	P value	P value summary	Significant?
number of molecules x cell type	19.47	0.0002	***	Yes
number of molecules	62.91	<0,0001	****	Yes
cell type	1.362e-08	0.9999	ns	No
Subject	12.75	0.0543	ns	No
ANOVA table	SS	DF	MS	F (DFn, DFd)	P value
number of molecules x cell type	0.3534	3	0.1178	F (3, 12) = 16,00	P=0,0002
number of molecules	1.142	3	0.3805	F (3, 12) = 19,73	P<0,0001
cell type	2.471e-10	1	2.471e-10	F (1, 12) = 3,357e-008	P=0,9999
Subject	0.2314	12	0.01928	F (12, 12) = 2,619	P=0,0543
Residual	0.08834	12	0.007362
Difference between column means
Mean of Idc (A:Y4 08.06.2018)	0.25
Mean of Mdc (B:Y4 08.06.2018)	0.25
Difference between means	5.558e-06
SE of difference	0.03034
95% CI of difference	-0,06609 to 0,06610
Data summary
Number of columns (cell type)	2
Number of rows (number of molecules)	4
Number of subjects (Subject)	16
Number of missing values	0
Compare each cell mean with the other cell mean in that row	FIGURE 1B Bonferroni multiple comparison test
Number of families	1
Number of comparisons per family	4
Alpha	0.05
Bonferroni's multiple comparisons test	Mean Diff,	95,00% CI of diff,	Below threshold?	Summary	Adjusted P Value
Idc (A:Y4 08.06.2018) - Mdc (B:Y4 08.06.2018)
1	0.3514	0,1733 to 0,5294	Yes	***	0.0003
2	-0.2063	-0,3843 to -0,02826	Yes	*	0.0211
3	-0.06354	-0,2416 to 0,1145	No	ns	>0,9999
4	-0.08151	-0,2595 to 0,09653	No	ns	0.8159
Test details	Mean 1	Mean 2	Mean Diff,	SE of diff,	N1	N2	t	DF
Idc (A:Y4 08.06.2018) - Mdc (B:Y4 08.06.2018)
1	0.5754	0.224	0.3514	0.06067	4	4	5.791	12
2	0.371	0.5773	-0.2063	0.06067	4	4	3.4	12
3	0.04063	0.1042	-0.06354	0.06067	4	4	1.047	12
4	0.013	0.0945	-0.08151	0.06067	4	4	1.343	12

## Sheet: Figure 1C
Experiment 1	Average siglec-1 spot size per cell			Experiment 2	Average siglec-1 spot size per cell			Experiment 3	Average siglec-1 spot size per cell			Experiment 4	Average siglec-1 spot size per cell
cell nº	iDC	mDC		cell nº	iDC	mDC		cell nº	iDC	mDC		cell nº	iDC	mDC
1	0.009033	0.01137		1	0.2622	0.1959		1	0.4021	0.4021		1	0.372756	0.194583
2	0.008627	0.0112		2	0.2114	0.2509		2	0.4277	0.2949		2	0.336182	0.185255
3	0.01017	0.009845		3	0.286	0.2565		3	0.529	0.258		3	0.371231	0.2
4	0.01073	0.01164		4	0.2871	0.2133		4	0.389	0.2866		4	0.347781	0.21012
5	0.009432	0.01317		5	0.3079	0.2243		5	0.4174	0.3358		5	0.380945	0.225293
6	0.007679	0.0108		6	0.2576	0.2199		6	0.3391	0.4182		6	0.402825	0.227877
7	0.01003	0.01095		7	0.2342	0.2384		7	0.5138	0.3143		7	0.235207	0.183913
8	0.009815	0.01072		8	0.2898	0.2289		8	0,9204*	0.2857		8	0.290737	0.175255
9	0.009255	0.01293		9	0.2623	0.2323		9	0.364	0.2804		9	0.62012	0.203384
10	0.009555	0.01362		10	0.3006	0.2181		10	0.3657	0.3001		Average	0.373087	0.200631
11	0.007484	0.01207		11	0.266	0.1771		Average	0.42449	0.31761		SD	0.10593	0.0181833
12	0.009839	0.01149		12	0.3492	0.217		SD	0.0669983	0.0530606
13	0.01064	0.01226		13	0.3498	0.1955
14	0.008821	0.01008		14	0.2238	0.2221
15	0.009605	0.01267		15	0.3154
16		0.01112		Average	0.28022	0.220729
Average	0.009381	0.0116209		SD	0.0410472	0.0213948
SD	0.000942803	0.00108913
All experiments	iDC	mDC
average exp 1	0.009381	0.0116209
average exp 2	0.00603053	0.00744871
average exp 3	0.0120621	0.0142629
average exp 4	0.00720467	0.0092503
Mean 1 to 4	0.00867	0.01065
S.E.M	0.001327	0.001478
Table Analyzed Paired T-test
Column B	mDC
vs.	vs,
Column A	Idc
Paired t test
P value	0.0019
P value summary	**
Significantly different (P < 0.05)?	Yes
One- or two-tailed P value?	Two-tailed
t, df	t=10,36, df=3
Number of pairs	4
How big is the difference?
Mean of differences (B - A)	0.001976
SD of differences	0.0003813
SEM of differences	0.0001907
95% confidence interval	0,001369 to 0,002583
R squared (partial eta squared)	0.9728
How effective was the pairing?
Correlation coefficient (r)	0.9965
P value (one tailed)	0.0017
P value summary	**
Was the pairing significantly effective?	Yes

## Sheet: Figure 1D
Experiment 1	Average NND between siglec-1 spots			Experiment 2	Average NND between siglec-1 spots			Experiment 3	Average NND between siglec-1 spots			Experiment 4	Average NND between siglec-1 spots
cell nº	iDC	mDC		cell nº	iDC	mDC		Cell nº	iDC	mDC		Cell nº	iDC	mDC
1	0.5367	0.2198		1	0.2622	0.1959		1	0.4021	0.4021		1	0.372756	0.194583
2	0.352	0.398		2	0.2114	0.2509		2	0.4277	0.2949		2	0.336182	0.185255
3	0.3335	0.3043		3	0.286	0.2565		3	0.529	0.258		3	0.371231	0.2
4	0.2899	0.2451		4	0.2871	0.2133		4	0.389	0.2866		4	0.347781	0.21012
5	0.2843	0.2655		5	0.3079	0.2243		5	0.4174	0.3358		5	0.380945	0.225293
6	0.2729	0.2433		6	0.2576	0.2199		6	0.3391	0.4182		6	0.402825	0.227877
7	0.3202	0.2376		7	0.2342	0.2384		7	0.5138	0.3143		7	0.235207	0.183913
8	0.3025	0.2987		8	0.2898	0.2289		8	0,9204*	0.2857		8	0.290737	0.175255
9	0.3855	0.2829		9	0.2623	0.2323		9	0.364	0.2804		9	0.62012	0.203384
10	0.5703	0.2706		10	0.3006	0.2181		10	0.3657	0.3001		average	0.373087	0.200631
11	0.3974	0.3756		11	0.266	0.1771		11	0.4971			SD	0.10593	0.0181833
12	0.2404	0.2932		12	0.3492	0.217		average	0.42449	0.31761
13	0.3022	0.3189		13	0.3498	0.1955		SD	0.0669983	0.0530606
14	0.2562	0.2265		14	0.2238	0.2221
15	0.2869	0.2921		15	0.3154
16		0.254		average	0.28022	0.220729
average	0.34206	0.282881		SD	0.0410472	0.0213948
SD	0.0964812	0.0500244
All experiments	iDC	mDC
average experiment 1	0.34206	0.282881
average experiment 2	0.28022	0.220729
average experiment 3	0.42449	0.31761
average experiment 4	0.373087	0.200631
Mean	0.355	0.2555
S.E.M	0.03016	0.02712
Table analyzed Paired t test
Column B	mDC
vs.	vs,
Column A	Idc
P value	0.0339
P value summary	*
Significantly different (P < 0.05)?	Yes
One- or two-tailed P value?	Two-tailed
t, df	t=3,716, df=3
Number of pairs	4
How big is the difference?
Mean of differences (B - A)	-0.0995
SD of differences	0.05355
SEM of differences	0.02678
95% confidence interval	-0,1847 to -0,01429
R squared (partial eta squared)	0.8215
How effective was the pairing?
Correlation coefficient (r)	0.5674
P value (one tailed)	0.2163
P value summary	ns
Was the pairing significantly effective?	No

## Sheet: Figure 1G
	Experiment 1	Frequency siglec-1 immobile fraction			Experiment 2	Frequency siglec-1 immobile fraction			Experiment 3	Frequency siglec-1 immobile fraction
	cell nº	iDC	mDC		cell nº	iDC	mDC		cell nº	iDC	mDC
	cell 1	0.226225	0.473786		cell 1	0.340996	0.604046		cell 1	0.533333	0.592179
	cell 2	0.204023	0.349364		cell 2	0.156962	0.607004		cell 2	0.139344	0.534091
	cell 3	0.25063	0.345324		cell 3	0.15512	0.525862		cell 3	0.100917	0.760204
	average	0.226959	0.389491		cell 4	0.142857	0.657244		cell 4	0.412322	0.640845
	S.D	0.023312	0.0730297		cell 5	0.203602	0.409894		cell 5	0.606796	0,904761905*
					cell 6	0.244635	0.121951		cell 6	0.580087	0.565445
					cell 7	0.422517	0.376		average	0.395467	0.618553
					cell 8		0.279412		S.D	0.223783	0.0883344
					average	0.238098	0.447677
					S.D	0.106747	0.185489
	All experiments	iDC	mDC
	average experiment 1	0.226959	0.389491
	average experiment 2	0.238098	0.447677
	average experiment 3	0.395467	0.618553
	Mean	0.286841	0.48524
	S.E.M	0.05441	0.08425
	Table Analyzed (Ratio Paired t-Test)
	Column B	mDC
	vs.	vs,
	Column A	iDC
	Ratio paired t test
	P value	0.0096
	P value summary	**
	Significantly different (P < 0.05)?	Yes
	One- or two-tailed P value?	Two-tailed
	t, df	t=10,15, df=2
	Number of pairs	3
	How big is the difference?
	Geometric mean of ratios (B / A)	1.715
	SD of log(ratios)	0.03997
	SEM of log(ratios)	0.02308
	95% confidence interval	1,365 to 2,156
	R squared (partial eta squared)	0.981
	How effective was the pairing?
	Correlation coefficient (r)	0.9759
	P value (one tailed)	0.07
	P value summary	ns
	Was the pairing significantly effective?	No

## Sheet: Figure 1H
Experiment 1	iDC					mDC							Experiment 2	iDC									mDC											Experiment 4	iDC								mDC
MSS slope	cell number					cell number							MSS slope	cell number									cell number											MSS slope	cell number								cell number
	1	2	3	average	SD	1	2	3	4	average	SD			1	2	3	4	5	6	7	average	SD	1	2	3	4	5	6	7	8	average	SD			1	2	3	4	5	6	average	SD	1	2	4	6	7	8	average
<0.2	0.221601	0.306859	0.294118	0.274193	0.0459888	0.413284	0.352174	0.432234	0.50989	0.426896	0.0650261		<0.2	0.461055	0.454545	0.389535	0.219219	0.262032	0.228632	0.582996	0.371145	0.138778	0.610294	0.643564	0.372727	0.350515	0.320988	0.277778	0.576923	0.673469	0.478282	0.162561		<0.2	0.485714	0.3	0.357143	0.419355	0.333333	0.474227	0.394962	0.0766291	0.361111	0.634146	0.543478	0.352941	0,7*	0.626506	0.503637
0.2 to 0.5	0.58473	0.519856	0.559664	0.55475	0.0327152	0.457565	0.484783	0.432234	0.404396	0.444744	0.034409		0.2 to 0.5	0.384422	0.426136	0.494186	0.588589	0.618538	0.554487	0.336032	0.486056	0.107425	0.25	0.237624	0.445455	0.453608	0.444444	0.583333	0.371795	0.27551	0.382721	0.121477		0.2 to 0.5	0.428571	0.590476	0.538776	0.443548	0.580247	0.371134	0.492125	0.090169	0.513889	0.195122	0.304348	0.45098	0,3*	0.204819	0.333832
> 0.5	0.193669	0.173285	0.146218	0.171057	0.0238033	0.129151	0.163043	0.135531	0.0857143	0.12836	0.0320086		> 0.5	0.154523	0.119318	0.116279	0.192192	0.11943	0.21688	0.0809717	0.142799	0.0477643	0.139706	0.118812	0.181818	0.195876	0.234568	0.138889	0.0512821	0.0510204	0.138996	0.0655138		> 0.5	0.0857143	0.109524	0.104082	0.137097	0.0864198	0.154639	0.112913	0.0277743	0.125	0.170732	0.152174	0.196078	0*	0.168675	0.162532
MSS slope	iDC					mDC
	Experiment 1	Experiment 2	Experiment 3	average	SEM	Experiment 1	Experiment 2	Experiment 3	average	SEM
<0.2	0.274193	0.371145	0.394962	0.346767	0.0369324	0.426896	0.478282	0.503637	0.469605	0.022574
0.2 to 0.5	0.55475	0.486056	0.492125	0.510977	0.0219565	0.444744	0.382721	0.333832	0.387099	0.0320923
> 0.5	0.171057	0.142799	0.112913	0.142256	0.0167869	0.12836	0.138996	0.162532	0.143296	0.0100962
Table Analyzed (Two Way ANOVA
Two-way RM ANOVA	Matching: Across row
Assume sphericity?	Yes
Alpha	0.05
Source of Variation	% of total variation	P value	P value summary	Significant?
Type of difussion x Treatment	11.41	0.0004	***	Yes
Type of difussion	82.94	0.0002	***	Yes
Treatment	0	>0,9999	ns	No
Subject	4.724	0.0342	*	Yes
ANOVA table	SS	DF	MS	F (DFn, DFd)	P value
Type of difussion x Treatment	0.04565	2	0.02283	F (2, 6) = 36,85	P=0,0004
Type of difussion	0.3318	2	0.1659	F (2, 6) = 52,67	P=0,0002
Treatment	0	1	0	F (1, 6) = 0,000	P>0,9999
Subject	0.0189	6	0.00315	F (6, 6) = 5,084	P=0,0342
Residual	0.003717	6	0.0006195
Difference between column means
Mean of mDC	0.3333
Mean of iDC	0.3333
Difference between means	0
SE of difference	0.01173
95% CI of difference	-0,02871 to 0,02871
Data summary
Number of columns (Treatment)	2
Number of rows (Type of difussion)	3
Number of subjects (Subject)	9
Number of missing values	0
Compare each cell mean with the other cell mean in that row
Number of families	1
Number of comparisons per family	3
Alpha	0.05
Bonferroni's multiple comparisons test	Mean Diff,	95,00% CI of diff,	Below threshold?	Summary	Adjusted P Value
mDC - iDC
0,2	0.1228	0,05603 to 0,1896	Yes	**	0.0028
0,5	-0.1239	-0,1907 to -0,05707	Yes	**	0.0027
>0,5	0.00104	-0,06577 to 0,06785	No	ns	>0,9999
Test details	Mean 1	Mean 2	Mean Diff,	SE of diff,	N1	N2	t	DF
mDC - iDC
0,2	0.4696	0.3468	0.1228	0.02032	3	3	6.044	6
0,5	0.3871	0.511	-0.1239	0.02032	3	3	6.096	6
>0,5	0.1433	0.1423	0.00104	0.02032	3	3	0.05116	6
[truncated: 1 more columns]
