# Supplementary material for: Actin-regulated Siglec-1 nanoclustering influences HIV-1 capture and virus-containing compartment formation in dendritic cells
Source: eLife journal article supplement (doi:10.7554/elife.78836), 2023-03-20
Supplement: fig1-figsupp1-data2 [file elife-78836-fig1-figsupp1-data2-v2.zip]

## Sheet: Figure S1I
					Prob. Nr Clusters												Prob. Nr Clusters
Donor A FL_PFA px30	1	2	3	4	5	6	7	8	9	10		Donor B FL_PFA px30	1	2	3	4	5	6	7	8	9	10
1	0.141551	0.378105	0.17619	0.244361	3.88549e-08	0.0544937	0.00333805	0.00196114	1.40254e-09	4.84543e-10		1	0.441038	0.342619	0.105682	0.103319	3.36363e-06	1.10995e-05	0.00721457	0.000112246	1.34953e-06	3.6392e-07
2	0.17348	0.278588	0.165576	0.168319	0.080244	0.0758241	0.00839659	0.0423199	3.37412e-08	0.00725228		2	0.0978942	0.500343	0.197264	0.178038	1.77179e-08	0.024438	0.000945902	0.00107791	2.74153e-09	6.90305e-10
3	0.327178	0.382442	0.179587	0.103959	9.37163e-06	0.00547528	0.00134624	1.86356e-06	3.93906e-07	2.3587e-07		3	0.273466	0.485348	0.119014	0.0890073	0.0225869	0.0105782	4.56421e-10	1.11126e-10	6.52098e-11	5.69483e-11
					Prob. Nr Clusters												Prob. Nr Clusters
Donor A FL_PFA px14	1	2	3	4	5	6	7	8	9	10		Donor B FL_PFA px14	1	2	3	4	5	6	7	8	9	10
1	0.326746	0.440218	0.131018	0.0807448	0.0189576	0.0023159	2.69388e-09	1.42052e-09	1.30747e-09	1.30298e-09		1	0.441383	0.554054	8.17696e-09	0.00456273	2.61736e-09	1.606e-09	1.57742e-09	1.57729e-09	1.57729e-09	1.57729e-09
2	0.602727	0.354055	0.0309302	0.00742192	0.00486354	2.02573e-06	2.95561e-07	2.41509e-07	2.39745e-07	2.39732e-07		2	0.039114	0.439013	0.294977	0.135122	0.0693077	5.76846e-09	0.021208	0.00125694	1.03555e-10	5.18326e-11
3	0.361104	0.50846	0.0930543	0.0350616	7.81459e-10	0.00231991	1.23446e-10	6.44308e-11	5.99797e-11	5.98367e-11		3	0.395064	0.565047	0.026858	0.00854676	0.00377702	4.13093e-07	2.66282e-07	0.00070562	5.79695e-07	1.69977e-07
	0.322131	0.390311	0.129393	0.106645	0.0173458	0.0234052	0.00218019	0.00738052	1.11694e-07	0.00120879			0.281326	0.481071	0.123966	0.0864327	0.0159458	0.00583795	0.00489479	0.000525453	3.22286e-07	8.9379e-08
	0.322131	0.390311	0.129393	0.158165									0.281326	0.481071	0.123966	0.113637
					Prob. Nr Clusters												Prob. Nr Clusters												Prob. Nr Clusters
Donor A SC_PFA px30	1	2	3	4	5	6	7	8	9	10		Donor B SC_PFA px30	1	2	3	4	5	6	7	8	9	10		Donor C SC_PFA px30	1	2	3	4	5	6	7	8	9	10
1	0.0710408	0.350198	0.241605	0.238721	0.0375609	0.0504481	2.0006e-08	0.0104259	6.61727e-09	8.82574e-10		1	0.186136	0.659249	0.0559001	0.0901422	0.00276516	0.00580491	1.32675e-06	3.41122e-07	1.94629e-07	1.67698e-07		1	0.0574604	0.525723	0.330428	0.0753758	0.0110129	2.50264e-10	9.12738e-11	7.29136e-11	7.16457e-11	7.16218e-11
2	0.18388	0.467328	0.179103	0.117827	0.0487889	4.04194e-08	1.35817e-08	0.00307382	1.54704e-08	2.22161e-09		2	0.518074	0.389777	1.57811e-07	0.0819333	1.11703e-06	0.00707034	5.17722e-08	3.74969e-08	0.0031441	8.90889e-08		2	0.290871	0.518774	0.104587	0.0688949	0.00357394	0.00701431	0.00628404	1.24598e-06	9.12555e-08	4.10542e-08
3	0.165489	0.373682	0.173687	0.177833	0.0587357	0.0146932	0.0358795	1.25616e-09	3.26337e-10	1.5808e-10		3	0.548101	0.300507	0.0589725	0.0204288	0.0574536	1.86909e-09	1.51009e-09	0.0145373	1.54756e-10	4.93584e-11		3	0.00346018	0.181264	0.285441	0.256164	0.128008	0.100052	1.01576e-07	0.0437247	0.00188669	2.2885e-09
					Prob. Nr Clusters												Prob. Nr Clusters												Prob. Nr Clusters
Donor A SC_PFA px14	1	2	3	4	5	6	7	8	9	10		Donor B SC_PFA px14	1	2	3	4	5	6	7	8	9	10		Donor C SC_PFA px14	1	2	3	4	5	6	7	8	9	10
1	0.295183	0.405287	0.127466	0.0966455	0.00844548	0.0351501	0.00370921	2.14038e-07	0.0247253	0.00338829		1	0.163321	0.740078	0.0767526	0.0196133	0.000234251	1.48792e-09	6.95539e-10	6.11094e-10	6.0753e-10	6.07499e-10		1	0.218497	0.781503	1.98054e-09	4.3621e-09	9.8048e-10	3.51531e-10	2.46081e-10	2.29117e-10	2.27593e-10	2.27532e-10
2	0.704779	0.290132	2.89889e-08	0.00508935	5.4801e-10	4.48396e-10	4.4693e-10	4.46927e-10	4.46927e-10	4.46927e-10		2	0.422939	0.446284	0.0769801	0.0459133	0.00318953	0.00126679	0.00194928	0.00147803	1.45901e-08	5.67123e-09		2	0.394576	0.555234	0.00252784	0.0476621	3.81059e-09	9.8938e-10	4.99786e-10	3.84296e-10	3.60558e-10	3.57644e-10
3	0.134117	0.50922	0.220042	0.0817183	0.0307935	0.0152055	0.00216451	0.00673893	8.57464e-09	1.90288e-09		3	0.426571	0.449597	0.0669249	0.0297266	0.0187246	0.00845644	4.61706e-08	2.59401e-09	1.30398e-09	1.12767e-09		3	0.158578	0.672095	0.109022	0.0603043	1.93059e-09	5.07324e-10	1.17219e-10	5.88432e-11	4.60477e-11	4.34528e-11
	0.259081	0.399308	0.156984	0.119639	0.0307208	0.0192495	0.00695888	0.00337314	0.00412088	0.000564715			0.377524	0.497582	0.0559218	0.0479596	0.0137281	0.00376641	0.000325118	0.00266929	0.000524052	4.40404e-08			0.187241	0.539099	0.138668	0.0847334	0.0237658	0.0178443	0.00104736	0.00728767	0.000314464	7.3405e-09
	0.259081	0.399308	0.156984	0.184627									0.377524	0.497582	0.0559218	0.0689725									0.187241	0.539099	0.138668	0.0847334
					Prob. Nr Clusters												Prob. Nr Clusters												Prob. Nr Clusters
Donor A SC_PFA_GA px30	1	2	3	4	5	6	7	8	9	10		Donor B SC_PFA_GA px30	1	2	3	4	5	6	7	8	9	10		Donor C SC_PFA_GA px30	1	2	3	4	5	6	7	8	9	10
1	0.554495	0.331509	0.0938443	1.40669e-08	0.0201523	3.17863e-09	1.09967e-09	9.33869e-10	9.2398e-10	9.23789e-10		1	0.21656	0.594271	0.0801329	0.0968236	0.000901593	0.0113103	1.21043e-09	6.30364e-10	5.65729e-10	5.61856e-10		1	0.274118	0.717727	2.44231e-07	0.00815417	7.60632e-08	4.0006e-08	3.77548e-08	3.77136e-08	3.77135e-08	3.77135e-08
2	0.393915	0.472855	0.0596872	0.0596096	0.00942645	0.000207539	1.71643e-10	1.20792e-10	2.1293e-10	0.00429977		2	0.349503	0.478292	0.0590876	0.053172	0.0333657	0.0109364	0.00867106	0.00276054	6.31177e-10	0.00421171		2	0.0427557	0.535423	0.286242	0.101478	0.0288361	4.79232e-10	0.00417984	0.00108572	4.29946e-11	1.95434e-11
3	0.616629	0.373371	2.87182e-08	0.00999946	1.5558e-09	1.09555e-09	1.0783e-09	1.07817e-09	1.07817e-09	1.07817e-09		3	0.457335	0.505076	0.00523994	0.032349	1.07268e-09	3.1225e-10	2.6893e-10	2.67525e-10	2.67515e-10	2.67515e-10		3	0.0715536	0.370422	0.239992	0.137813	0.153389	0.012848	0.00909105	0.00489141	1.13418e-07	4.5323e-08
					Prob. Nr Clusters												Prob. Nr Clusters												Prob. Nr Clusters
Donor A SC_PFA_GA px14	1	2	3	4	5	6	7	8	9	10		Donor B SC_PFA_GA px14	1	2	3	4	5	6	7	8	9	10		Donor C SC_PFA_GA px14	1	2	3	4	5	6	7	8	9	10
1	0.313618	0.570352	0.114004	4.79092e-10	0.00115501	2.67031e-11	2.32244e-11	0.000870622	2.95312e-11	1.47571e-11		1	0.311125	0.548334	0.113823	0.0261798	4.22321e-07	0.000536976	3.84259e-08	2.56135e-08	2.51935e-08	2.5191e-08		1	0.0574604	0.525723	0.330428	0.0753758	0.0110129	2.50264e-10	9.12738e-11	7.29136e-11	7.16457e-11	7.16218e-11
2	0.139648	0.63275	0.154312	0.059632	0.00964578	0.00401165	2.48435e-10	1.65609e-10	1.61004e-10	1.60934e-10		2	0.34255	0.448289	0.155942	0.0453195	0.00561865	2.42666e-10	0.00222219	5.86983e-05	1.69203e-11	1.18781e-11		2	0.290871	0.518774	0.104587	0.0688949	0.00357394	0.00701431	0.00628404	1.24598e-06	9.12555e-08	4.10542e-08
3	0.260272	0.527433	0.1822	0.0252505	0.0027412	0.00210312	1.04712e-09	3.14994e-10	2.71357e-10	2.70094e-10		3	0.315783	0.569989	0.0932499	0.0156773	0.00359145	0.00170986	1.3717e-09	1.0442e-09	1.03499e-09	1.03494e-09		3	0.00346018	0.181264	0.285441	0.256164	0.128008	0.100052	1.01576e-07	0.0437247	0.00188669	2.2885e-09
	0.379763	0.484712	0.100675	0.0257486	0.00718679	0.00105372	6.11398e-10	0.000145104	4.46162e-10	0.000716629			0.332143	0.524042	0.0845793	0.0449202	0.0072463	0.00408226	0.00181555	0.000469878	4.6183e-09	0.000701956			0.12337	0.474889	0.207782	0.10798	0.0541366	0.0199856	0.00325918	0.00828386	0.000314489	2.10784e-08
	0.379763	0.484712	0.100675	0.0348508									0.332143	0.524042	0.0845793	0.0592361									0.12337	0.474889	0.207782	0.19396

## Sheet: Figure S1K
		average siglec-1 cluster area (norm to random)
	cell nº	iDC	mDC
	1	1.42101	1.76243
	2	1.42679	1.62235
	3	1.39627	1.63568
	4	1.43155	1.6208
	5	1.6276	1.72921
	6	1.1833	1.76586
	7	1,937611*	1.33366
	8	1.58676	1.67085
	9	1.1962	1.39142
	10		1.59499
	average	1.40869	1.61272
	SD	0.158899	0.14555
	Table Analyzed (Mann-Whitney test)
	Column B	mDC
	vs.	vs,
	Column A	iDC
	Mann Whitney test
	P value	0.0266
	Exact or approximate P value?	Exact
	P value summary	*
	Significantly different (P < 0.05)?	Yes
	One- or two-tailed P value?	Two-tailed
	Sum of ranks in column A,B	51 , 120
	Mann-Whitney U	15
	Difference between medians
	Median of column A	1,424, n=8
	Median of column B	1,629, n=10
	Difference: Actual	0.2051
	Difference: Hodges-Lehmann	0.2006

## Sheet: Figure S1L
		average siglec-1 cluster area (norm to random)
	cell nº	iDC	mDC
	1	0.871843	0.691788
	2	0.782771	0.67801
	3	0.792824	0.69808
	4	0.794608	0.666561
	5	0.942588	0.640239
	6	0.839867	0.625755
	7	0.654606	0.6958
	8	0.723855	0.622293
	9	0.86703	0.673287
	10		0.670204
	average	0.807777	0.666202
	SD	0.0854003	0.0278701
	Table Analyzed (Mann-Whitney test)
	Column B	mDC
	vs.	vs,
	Column A	iDC
	Mann Whitney test
	P value	0.001
	Exact or approximate P value?	Exact
	P value summary	***
	Significantly different (P < 0.05)?	Yes
	One- or two-tailed P value?	Two-tailed
	Sum of ranks in column A,B	128 , 62
	Mann-Whitney U	7
	Difference between medians
	Median of column A	0,7946, n=9
	Median of column B	0,6717, n=10
	Difference: Actual	-0.1229
	Difference: Hodges-Lehmann	-0.1503

## Sheet: Figure S1M
		average siglec-1 cluster area (norm to random)
	cell nº	iDC	mDC
	1	1.31808	2.30151
	2	1.15224	2.13096
	3	1.27388	1.98233
	4	1.27897	1.96684
	5	1.32843	2.30915
	6	1.33652	1.80576
	7		1.56115
	8		1.92042
	9		1.2422
	10		1.31483
	average	1.28135	1.85352
	SD	0.0683239	0.375772
	Table Analyzed (Mann-Whitney test)
	Column B	mDC
	vs.	vs,
	Column A	iDC
	Mann Whitney test
	P value	0.016
	Exact or approximate P value?	Exact
	P value summary	*
	Significantly different (P < 0.05)?	Yes
	One- or two-tailed P value?	Two-tailed
	Sum of ranks in column A,B	29 , 107
	Mann-Whitney U	8
	Difference between medians
	Median of column A	1,299, n=6
	Median of column B	1,944, n=10
	Difference: Actual	0.6451
	Difference: Hodges-Lehmann	0.6462
