# Supplementary material for: Actin-regulated Siglec-1 nanoclustering influences HIV-1 capture and virus-containing compartment formation in dendritic cells
Source: eLife journal article supplement (doi:10.7554/elife.78836), 2023-03-20
Supplement: fig2-data1 [file Figure 2-source data 1.xlsx]

## Sheet: Figure 2B
	% of total intensity (in mDC)												% of total intensity (in iDC)
	siglec					actin							siglec					actin
Distance from cell centre (% of radius)	Experiment 1	Experiment 2	Experiment 3	average	SEM	Experiment 1	Experiment 2	Experiment 3	average	SEM		Distance from cell centre (% of radius)	Experiment 1	Experiment 2	Experiment 3	average	SEM	Experiment 1	Experiment 2	Experiment 3	average	SEM
0.5	0.000287	0.001123	0.002526	0.001312	0.000653215	0.000588	0.000677	0.001446	0.000903667	0.000272381		0.5	0.000771	0.001059	0.001098	0.000976	0.000103116	0.000562	0.00073	0.000578	0.000623333	5.3533e-05
1	0.000764	0.001108	0.006504	0.002792	0.00185865	0.001601	0.001807	0.003647	0.00235167	0.000650391		1	0.00225	0.003065	0.003351	0.00288867	0.000329833	0.001673	0.00173	0.001682	0.001695	1.76918e-05
1.5	0.001426	0.002275	0.011928	0.00520967	0.0033681	0.002777	0.003343	0.006813	0.004311	0.00126162		1.5	0.003778	0.00552	0.005766	0.00502133	0.00062571	0.002937	0.00297	0.002998	0.00296833	1.76289e-05
2	0.002042	0.003387	0.015643	0.007024	0.00432696	0.003962	0.004833	0.009085	0.00596	0.0015826		2	0.004928	0.007399	0.007649	0.00665867	0.000868338	0.004049	0.004142	0.004192	0.00412767	4.1898e-05
2.5	0.002701	0.004599	0.01878	0.00869333	0.00507301	0.005181	0.006176	0.01114	0.007499	0.00184302		2.5	0.00605	0.008957	0.009864	0.00829033	0.00115036	0.005111	0.004863	0.005348	0.00510733	0.000140019
3	0.003291	0.005404	0.02236	0.0103517	0.00603507	0.006423	0.007515	0.014265	0.009401	0.00245235		3	0.007475	0.01136	0.012258	0.0103643	0.00146774	0.006131	0.005831	0.006403	0.00612167	0.000165188
3.5	0.003908	0.006566	0.025071	0.0118483	0.00665571	0.007807	0.00913	0.01681	0.011249	0.00280661		3.5	0.008954	0.014534	0.014706	0.0127313	0.00188932	0.007223	0.007094	0.007659	0.00732533	0.000170939
4	0.00456	0.008275	0.027775	0.0135367	0.00719949	0.009125	0.010868	0.018816	0.0129363	0.00298258		4	0.009991	0.016502	0.016377	0.01429	0.0021498	0.008447	0.008745	0.00888	0.00869067	0.000127914
4.5	0.005473	0.010267	0.031158	0.0156327	0.00788506	0.010472	0.012643	0.022214	0.0151097	0.00360703		4.5	0.011528	0.020081	0.01743	0.0163463	0.00252779	0.009567	0.00956	0.010147	0.009758	0.00019451
5	0.006136	0.012041	0.03528	0.017819	0.00889536	0.011579	0.014526	0.025342	0.017149	0.0041839		5	0.013011	0.021823	0.019426	0.0180867	0.00263048	0.010514	0.010783	0.011269	0.0108553	0.00022093
5.5	0.006775	0.012344	0.038422	0.0191803	0.00975423	0.012901	0.016034	0.027157	0.0186973	0.00432544		5.5	0.01395	0.024085	0.021261	0.0197653	0.00301979	0.0117	0.012465	0.012143	0.0121027	0.000221755
6	0.007393	0.013479	0.041486	0.020786	0.0104981	0.014208	0.017379	0.029435	0.0203407	0.00463839		6	0.015413	0.025735	0.023352	0.0215	0.00312028	0.012897	0.014207	0.013364	0.0134893	0.000383322
6.5	0.008065	0.015436	0.045379	0.02296	0.0114097	0.015578	0.018606	0.031748	0.0219773	0.00496292		6.5	0.017449	0.025588	0.026098	0.023045	0.00280187	0.014073	0.015451	0.014917	0.0148137	0.000401136
7	0.008798	0.017346	0.049201	0.025115	0.0122932	0.016706	0.020027	0.033313	0.0233487	0.00507357		7	0.01908	0.028358	0.029347	0.025595	0.00326999	0.015054	0.016568	0.016504	0.016042	0.000494345
7.5	0.009346	0.018681	0.051707	0.026578	0.0128502	0.018128	0.021455	0.035798	0.025127	0.00542125		7.5	0.020273	0.031368	0.031579	0.02774	0.003734	0.016004	0.017845	0.01814	0.0173297	0.000668281
8	0.010116	0.019968	0.054378	0.028154	0.0134169	0.019339	0.023433	0.039631	0.0274677	0.00619543		8	0.021497	0.031935	0.034124	0.0291853	0.00389576	0.017269	0.019753	0.019485	0.0188357	0.000787144
8.5	0.010773	0.020851	0.057887	0.029837	0.0143236	0.020773	0.025517	0.041708	0.0293327	0.0063374		8.5	0.023278	0.032745	0.037053	0.0310253	0.0040684	0.018658	0.021551	0.020663	0.0202907	0.000855636
9	0.011378	0.021818	0.060828	0.0313413	0.0150482	0.022272	0.02713	0.043395	0.0309323	0.00638719		9	0.024002	0.035574	0.038964	0.0328467	0.00452932	0.01963	0.022443	0.021725	0.021266	0.000843851
9.5	0.012086	0.024094	0.064417	0.0335323	0.0158266	0.023979	0.029069	0.044998	0.032682	0.00633087		9.5	0.025308	0.037806	0.04073	0.0346147	0.00472927	0.02089	0.024001	0.02357	0.0228203	0.000973153
10	0.012957	0.025354	0.069323	0.035878	0.0171011	0.0257	0.031107	0.04796	0.0349223	0.0067031		10	0.026575	0.03903	0.041876	0.035827	0.00469839	0.022059	0.025604	0.024548	0.0240703	0.00105085
10.5	0.014066	0.026406	0.072793	0.037755	0.0178775	0.027476	0.03349	0.05056	0.0371753	0.00691385		10.5	0.028821	0.041221	0.043423	0.0378217	0.004545	0.023036	0.026361	0.025178	0.0248583	0.000973062
11	0.014979	0.02733	0.076009	0.0394393	0.0186292	0.029214	0.036339	0.053216	0.0395897	0.00711686		11	0.030856	0.044215	0.045163	0.040078	0.00461911	0.023968	0.027388	0.026205	0.0258537	0.00100278
11.5	0.016062	0.028942	0.081064	0.0420227	0.0198716	0.03089	0.038249	0.05567	0.041603	0.00734731		11.5	0.031344	0.047027	0.04691	0.0417603	0.00520828	0.024736	0.029288	0.02746	0.0271613	0.00132251
12	0.016548	0.031183	0.087009	0.0449133	0.0214676	0.032392	0.039161	0.059036	0.0435297	0.00799562		12	0.032437	0.051089	0.048656	0.0440607	0.00585412	0.025587	0.031411	0.02926	0.0287527	0.00170027
12.5	0.017306	0.033793	0.093136	0.0480783	0.0230261	0.034087	0.040963	0.061247	0.0454323	0.00815266		12.5	0.032856	0.055879	0.051191	0.046642	0.00702459	0.026692	0.032974	0.031162	0.030276	0.00186678
13	0.018324	0.036696	0.097479	0.050833	0.0239184	0.035867	0.042767	0.062694	0.0471093	0.00804288		13	0.034682	0.059266	0.05537	0.0497727	0.00762869	0.027977	0.034086	0.033035	0.0316993	0.00188573
13.5	0.019083	0.039771	0.100742	0.0531987	0.0245104	0.037539	0.044473	0.063412	0.0484747	0.00773225		13.5	0.035987	0.062222	0.058985	0.052398	0.00825854	0.029176	0.036227	0.034438	0.0332803	0.00211615
14	0.020248	0.043163	0.101558	0.0549897	0.0242056	0.039259	0.046577	0.063469	0.0497683	0.00716867		14	0.03762	0.06717	0.058518	0.054436	0.00877112	0.030348	0.03823	0.035514	0.0346973	0.00231169
14.5	0.021915	0.044541	0.101603	0.0560197	0.0237091	0.04093	0.04844	0.063222	0.050864	0.00654829		14.5	0.039422	0.072502	0.063433	0.0584523	0.00986875	0.031538	0.039363	0.038051	0.0363173	0.00241949
15	0.02394	0.045245	0.101936	0.0570403	0.0232751	0.042659	0.051028	0.063842	0.0525097	0.00615972		15	0.04172	0.078729	0.066894	0.0624477	0.0109124	0.032562	0.041352	0.039894	0.037936	0.00271976
15.5	0.025319	0.045225	0.102805	0.057783	0.0232329	0.044607	0.05242	0.065502	0.0541763	0.00609546		15.5	0.043277	0.08126	0.067484	0.064007	0.0111017	0.033988	0.042639	0.04127	0.039299	0.00268475
16	0.026621	0.046013	0.103024	0.0585527	0.0229295	0.046768	0.054205	0.066921	0.0559647	0.00588382		16	0.045002	0.083453	0.069769	0.0660747	0.0112525	0.035207	0.043977	0.042545	0.0405763	0.00271631
16.5	0.027719	0.047722	0.104923	0.0601213	0.0231331	0.048798	0.056023	0.068393	0.057738	0.00572122		16.5	0.04668	0.082267	0.0723	0.0670823	0.0105992	0.036715	0.046179	0.043922	0.042272	0.00285387
17	0.028664	0.048905	0.108558	0.0620423	0.0239806	0.050989	0.057404	0.070138	0.0595103	0.00562727		17	0.048405	0.077279	0.077653	0.067779	0.0096876	0.03793	0.046577	0.045386	0.0432977	0.00270577
17.5	0.030365	0.051085	0.109445	0.0636317	0.0236747	0.05266	0.059323	0.070884	0.0609557	0.00532378		17.5	0.049857	0.080417	0.080105	0.0701263	0.0101351	0.039047	0.047639	0.046846	0.0445107	0.00274141
18	0.032038	0.051609	0.111669	0.0651053	0.0239575	0.054528	0.061263	0.072761	0.0628507	0.00532294		18	0.052676	0.08408	0.08178	0.0728453	0.0101065	0.040593	0.048029	0.048466	0.045696	0.00255462
18.5	0.033695	0.05273	0.115666	0.0673637	0.0247684	0.056375	0.062968	0.075323	0.0648887	0.00555348		18.5	0.05494	0.083577	0.087092	0.075203	0.0101822	0.042035	0.048955	0.04998	0.04699	0.00249511
19	0.035932	0.055105	0.118455	0.0698307	0.0249342	0.058249	0.065226	0.075876	0.0664503	0.00512517		19	0.056727	0.081926	0.089992	0.076215	0.0100183	0.043203	0.051193	0.052267	0.0488877	0.00285919
19.5	0.037872	0.058588	0.121813	0.0727577	0.0252462	0.060023	0.06744	0.076898	0.0681203	0.00488326		19.5	0.059609	0.084114	0.090292	0.078005	0.0093693	0.044305	0.052551	0.054444	0.0504333	0.00311251
20	0.039213	0.063001	0.126482	0.076232	0.0260465	0.062242	0.06977	0.078223	0.0700783	0.00461589		20	0.061407	0.084288	0.090689	0.0787947	0.00888803	0.046103	0.053306	0.056285	0.051898	0.00302242
20.5	0.040686	0.066075	0.131743	0.0795013	0.0271296	0.064634	0.071344	0.080996	0.0723247	0.00474869		20.5	0.064338	0.08745	0.092374	0.0813873	0.00864236	0.047673	0.055624	0.057406	0.0535677	0.00299189
21	0.042764	0.069415	0.13603	0.0827363	0.0277352	0.066852	0.072646	0.082267	0.0739217	0.00449541		21	0.065643	0.090875	0.095731	0.084083	0.00932596	0.049554	0.057454	0.058726	0.0552447	0.00286893
21.5	0.043939	0.073183	0.141947	0.0863563	0.0290491	0.069425	0.075178	0.083642	0.0760817	0.00412889		21.5	0.067251	0.093272	0.097348	0.085957	0.00942672	0.051107	0.060217	0.060113	0.0571457	0.00301948
22	0.046403	0.077462	0.149904	0.0912563	0.0306639	0.072408	0.077472	0.088086	0.079322	0.00461941		22	0.069778	0.098	0.097009	0.0882623	0.00924659	0.052829	0.062513	0.061166	0.058836	0.00302857
22.5	0.049648	0.078504	0.15746	0.095204	0.0322233	0.075358	0.080523	0.090535	0.0821387	0.00445508		22.5	0.072375	0.101227	0.101521	0.0917077	0.00966671	0.054608	0.06368	0.06397	0.0607527	0.00307347
23	0.052787	0.081287	0.166141	0.100072	0.0340437	0.07853	0.083001	0.096119	0.0858833	0.00527807		23	0.075644	0.10486	0.105627	0.095377	0.00986898	0.055925	0.064817	0.065867	0.062203	0.0031536
23.5	0.056355	0.085201	0.178941	0.106832	0.0370035	0.082088	0.085669	0.102079	0.0899453	0.00615427		23.5	0.07929	0.106255	0.106795	0.0974467	0.00907967	0.057157	0.066834	0.067346	0.063779	0.0033143
24	0.059033	0.088235	0.191388	0.112885	0.0401464	0.085532	0.087197	0.108216	0.0936483	0.00729967		24	0.081308	0.109639	0.109612	0.100186	0.00943917	0.058896	0.068939	0.069136	0.065657	0.00338098
24.5	0.061289	0.090987	0.19839	0.116889	0.0416427	0.088688	0.088875	0.114076	0.097213	0.00843167		24.5	0.082856	0.10798	0.114519	0.101785	0.00965091	0.06101	0.069489	0.072387	0.0676287	0.00341344
25	0.064154	0.093846	0.208259	0.122086	0.0439306	0.092658	0.091857	0.116927	0.100481	0.00822642		25	0.084341	0.106226	0.114415	0.101661	0.00897669	0.063456	0.072624	0.074695	0.0702583	0.00345331
25.5	0.06788	0.097395	0.220264	0.128513	0.04666	0.096593	0.096192	0.120951	0.104579	0.00818699		25.5	0.084954	0.111725	0.11594	0.104206	0.00970276	0.065274	0.076988	0.076196	0.0728193	0.00377959
26	0.071824	0.102826	0.230318	0.134989	0.0484972	0.100379	0.099297	0.12387	0.107849	0.00801675		26	0.085433	0.119001	0.118208	0.107547	0.0110595	0.066158	0.079817	0.076876	0.0742837	0.00415059
26.5	0.076634	0.107019	0.237004	0.140219	0.049181	0.104272	0.101212	0.126805	0.110763	0.00806949		26.5	0.087241	0.118399	0.121201	0.108947	0.0108831	0.067532	0.081925	0.076687	0.0753813	0.00420588
27	0.081606	0.10893	0.246423	0.145653	0.0509987	0.108601	0.104065	0.128532	0.113733	0.00751463		27	0.089585	0.118398	0.12132	0.109768	0.0101265	0.069446	0.083275	0.075786	0.076169	0.00399668
27.5	0.0868	0.1126	0.255184	0.151528	0.0523604	0.1129	0.106711	0.133666	0.117759	0.0081517		27.5	0.091431	0.116667	0.120919	0.109672	0.00920289	0.07062	0.084731	0.075299	0.0768833	0.00414981
28	0.091863	0.116691	0.265631	0.158062	0.0542601	0.11751	0.109542	0.138832	0.121961	0.00874332		28	0.093498	0.118964	0.120859	0.111107	0.00882148	0.072012	0.08758	0.075643	0.0784117	0.00470247
28.5	0.097	0.123802	0.276682	0.165828	0.0559644	0.123209	0.112739	0.14319	0.126379	0.00893223		28.5	0.096805	0.124599	0.123011	0.114805	0.00901167	0.073052	0.088012	0.077429	0.0794977	0.00444072
29	0.102573	0.124958	0.29051	0.17268	0.0592682	0.128422	0.115711	0.147447	0.130527	0.00922163		29	0.100779	0.12776	0.123951	0.117497	0.00843084	0.075837	0.089706	0.078244	0.0812623	0.00427863
29.5	0.110251	0.122786	0.303698	0.178912	0.062498	0.134515	0.118033	0.150521	0.134356	0.00937881		29.5	0.106789	0.131992	0.127542	0.122108	0.00776631	0.077581	0.093899	0.079108	0.0835293	0.00520354
30	0.118554	0.123255	0.315691	0.185833	0.064943	0.140192	0.12078	0.154174	0.138382	0.0096824		30	0.112007	0.131647	0.130353	0.124669	0.00634201	0.079409	0.096296	0.079974	0.0852263	0.00553724
30.5	0.127668	0.123622	0.323356	0.191549	0.065914	0.146543	0.122394	0.159447	0.142795	0.0108592		30.5	0.114362	0.133495	0.129688	0.125848	0.00584737	0.081177	0.097367	0.081153	0.0865657	0.00540067
31	0.136286	0.124022	0.324042	0.194783	0.0647262	0.152891	0.125371	0.162987	0.147083	0.0112404		31	0.119277	0.14034	0.131003	0.130207	0.00609339	0.08309	0.100318	0.082637	0.0886817	0.00581964
31.5	0.143724	0.127404	0.321361	0.197496	0.0621113	0.160043	0.127738	0.168904	0.152228	0.0125095		31.5	0.122943	0.143222	0.129883	0.132016	0.0059504	0.085454	0.102371	0.083168	0.090331	0.00605606
32	0.148113	0.127211	0.321851	0.199058	0.0616921	0.164694	0.128837	0.173258	0.155596	0.0136062		32	0.121977	0.146162	0.130861	0.133	0.00706305	0.0878	0.105428	0.083971	0.0923997	0.00660728
32.5	0.15305	0.130169	0.324956	0.202725	0.0614714	0.169996	0.132154	0.177284	0.159811	0.0139878		32.5	0.119492	0.15404	0.134458	0.135997	0.0100028	0.088308	0.107316	0.084556	0.0933933	0.00704509
33	0.159753	0.130531	0.332568	0.207617	0.0630423	0.175739	0.135184	0.183291	0.164738	0.0149369		33	0.116549	0.158082	0.137693	0.137441	0.0119902	0.090403	0.112527	0.086905	0.0966117	0.00802148
33.5	0.168876	0.134953	0.339193	0.214341	0.0631896	0.181415	0.137126	0.18863	0.169057	0.0161008		33.5	0.111992	0.158606	0.138562	0.136387	0.0135002	0.091533	0.116561	0.090064	0.099386	0.00859796
34	0.175334	0.139729	0.348155	0.221073	0.0643671	0.186064	0.139633	0.196273	0.17399	0.0174295		34	0.112645	0.159263	0.139921	0.137276	0.0135223	0.092485	0.120296	0.09186	0.101547	0.00937624
34.5	0.179346	0.14325	0.351657	0.224751	0.0643029	0.190342	0.142577	0.203292	0.178737	0.0184624		34.5	0.113309	0.163514	0.141282	0.139368	0.0145245	0.093581	0.123835	0.093026	0.103481	0.0101784
35	0.183326	0.14667	0.355094	0.228363	0.0642428	0.193405	0.14617	0.20901	0.182862	0.0188908		35	0.114551	0.16929	0.143068	0.142303	0.0158064	0.093987	0.127885	0.093111	0.104994	0.0114481
35.5	0.188045	0.150389	0.364422	0.234285	0.0659701	0.19642	0.148629	0.217234	0.187428	0.0203085		35.5	0.116113	0.1743	0.145919	0.145444	0.0167988	0.093728	0.134181	0.093429	0.107113	0.0135344
36	0.193088	0.1499	0.37371	0.238899	0.0685486	0.199363	0.150974	0.224293	0.191543	0.0215235		36	0.11551	0.183283	0.145411	0.148068	0.0196094	0.095109	0.139029	0.094295	0.109478	0.0147775
36.5	0.20109	0.150144	0.383246	0.244827	0.070755	0.201445	0.154361	0.228604	0.194803	0.0216879		36.5	0.114852	0.19286	0.144915	0.150876	0.0227153	0.096405	0.143462	0.096736	0.112201	0.0156308
37	0.210061	0.151377	0.394381	0.25194	0.0732077	0.205371	0.156807	0.23458	0.198919	0.0226817		37	0.115377	0.2034	0.146133	0.15497	0.0257914	0.098894	0.148628	0.098198	0.11524	0.0166952
37.5	0.219383	0.154179	0.406945	0.260169	0.0757634	0.20879	0.159312	0.241456	0.203186	0.0238779		37.5	0.118642	0.21459	0.145683	0.159638	0.0285632	0.100298	0.157853	0.099152	0.119101	0.0193788
38	0.226962	0.157398	0.416739	0.267033	0.0774999	0.212215	0.162141	0.247431	0.207262	0.0247453		38	0.121573	0.218032	0.143614	0.161073	0.0291816	0.100528	0.162898	0.099423	0.12095	0.0209766
38.5	0.230003	0.164713	0.425265	0.273327	0.0782721	0.21485	0.165797	0.25254	0.211062	0.0251121		38.5	0.123278	0.221425	0.142704	0.162469	0.0300067	0.102413	0.165662	0.099206	0.122427	0.0216373
39	0.231716	0.173628	0.432384	0.279243	0.0783853	0.217221	0.168766	0.260301	0.215429	0.0264391		39	0.124754	0.233684	0.145045	0.167828	0.0334451	0.104856	0.170126	0.100216	0.125066	0.0225698
39.5	0.234872	0.179418	0.436893	0.283728	0.0782379	0.219679	0.171917	0.270506	0.220701	0.0284648		39.5	0.124491	0.258873	0.145628	0.176331	0.0417198	0.106454	0.178315	0.10148	0.12875	0.0248242
40	0.236566	0.180096	0.438113	0.284925	0.0783095	0.221855	0.176416	0.275068	0.224446	0.0285078		40	0.122798	0.282277	0.144384	0.183153	0.0499522	0.108692	0.18607	0.100838	0.131867	0.0271963
40.5	0.241203	0.179268	0.440928	0.287133	0.0789486	0.22375	0.180561	0.282962	0.229091	0.029681		40.5	0.121748	0.306228	0.143	0.190325	0.0582752	0.11009	0.191887	0.100606	0.134194	0.028976
41	0.247829	0.180239	0.445121	0.291063	0.0794617	0.225937	0.185646	0.291666	0.234416	0.0308976		41	0.123285	0.311164	0.144219	0.192889	0.0594453	0.111556	0.196532	0.101766	0.136618	0.03009
41.5	0.251284	0.183866	0.444401	0.293184	0.0780733	0.226113	0.190466	0.2991	0.23856	0.0319715		41.5	0.124825	0.307176	0.144108	0.192036	0.0578383	0.112963	0.202465	0.102597	0.139342	0.0317032
42	0.255833	0.187921	0.448037	0.297264	0.0778941	0.225709	0.194616	0.304863	0.241729	0.0328181		42	0.125674	0.309645	0.145708	0.193676	0.0582724	0.113887	0.208896	0.10394	0.142241	0.033451
42.5	0.261173	0.193309	0.452044	0.302175	0.0774529	0.22652	0.197692	0.312303	0.245505	0.0344202		42.5	0.127125	0.321542	0.148858	0.199175	0.0615043	0.115604	0.213291	0.104995	0.14463	0.0344668
43	0.265379	0.204277	0.456492	0.308716	0.0759642	0.226409	0.200885	0.323701	0.250332	0.0374173		43	0.130304	0.319042	0.151584	0.20031	0.059683	0.114447	0.219092	0.105889	0.146476	0.036392
43.5	0.269967	0.20995	0.462784	0.314234	0.0762691	0.225772	0.204706	0.331997	0.254158	0.0393916		43.5	0.130581	0.316328	0.151799	0.199569	0.0586998	0.115257	0.22414	0.106174	0.148524	0.037899
44	0.274275	0.217171	0.466201	0.319216	0.0753187	0.225896	0.208361	0.339162	0.257806	0.0409916		44	0.130297	0.319096	0.151282	0.200225	0.0597434	0.115922	0.231155	0.10645	0.151176	0.040083
44.5	0.277067	0.224079	0.466464	0.322537	0.0735714	0.225971	0.213085	0.348532	0.262529	0.0431619		44.5	0.129525	0.322073	0.153751	0.201783	0.0605502	0.115347	0.236028	0.107645	0.153007	0.0415702
45	0.280373	0.233924	0.46756	0.327286	0.0714074	0.226921	0.217714	0.355888	0.266841	0.0446028		45	0.125441	0.310602	0.155578	0.197207	0.0573611	0.114929	0.240574	0.108755	0.154753	0.0429477
45.5	0.285318	0.244442	0.466509	0.33209	0.0682376	0.229852	0.222488	0.360462	0.270934	0.0448144		45.5	0.124145	0.292999	0.151721	0.189622	0.0522981	0.115107	0.247227	0.108979	0.157104	0.045096
46	0.294016	0.254508	0.467233	0.338586	0.0653269	0.232908	0.226673	0.366424	0.275335	0.0455801		46	0.121811	0.288242	0.150639	0.186897	0.0513511	0.115072	0.254111	0.109439	0.159541	0.0473131
46.5	0.303621	0.26598	0.466097	0.345233	0.0614013	0.236485	0.231351	0.372849	0.280228	0.046334		46.5	0.120275	0.294181	0.150958	0.188471	0.0535919	0.114358	0.261788	0.110942	0.162363	0.0497224
47	0.312466	0.276388	0.468116	0.352323	0.0588256	0.239152	0.238526	0.379377	0.285685	0.0468463		47	0.121629	0.312799	0.148763	0.194397	0.0597169	0.114107	0.266106	0.112621	0.164278	0.0509158
47.5	0.319117	0.285711	0.469353	0.35806	0.0564758	0.242626	0.245266	0.387633	0.291842	0.0479017		47.5	0.12141	0.32952	0.146475	0.199135	0.0655928	0.114342	0.271235	0.113613	0.166397	0.0524196
48	0.327505	0.289849	0.477307	0.364887	0.0572515	0.247049	0.250881	0.397446	0.298459	0.049506		48	0.121342	0.333076	0.147973	0.200797	0.0665848	0.115453	0.277904	0.114487	0.169281	0.054312
48.5	0.336899	0.300279	0.48577	0.374316	0.0567208	0.252682	0.256986	0.406498	0.305389	0.0505699		48.5	0.117549	0.331582	0.14928	0.19947	0.0666879	0.115114	0.284554	0.115961	0.171876	0.0563394
49	0.347105	0.310288	0.492523	0.383305	0.0556335	0.258786	0.264441	0.413043	0.31209	0.0505029		49	0.114429	0.33082	0.151692	0.19898	0.0667917	0.11442	0.289959	0.118401	0.17426	0.0578609
49.5	0.358804	0.32114	0.503708	0.394551	0.0556511	0.263608	0.271218	0.419409	0.318078	0.0507129		49.5	0.113822	0.322409	0.149842	0.195358	0.064371	0.113852	0.299277	0.120988	0.178039	0.060654
50	0.370378	0.333879	0.507415	0.403891	0.0528236	0.26784	0.280326	0.422639	0.323602	0.0496497		50	0.11409	0.33251	0.150655	0.199085	0.0675424	0.113408	0.303222	0.122027	0.179552	0.0618849
50.5	0.378657	0.342328	0.514794	0.411926	0.0524921	0.271931	0.288125	0.423234	0.327763	0.0479637		50.5	0.113006	0.334913	0.151006	0.199642	0.0685195	0.113791	0.302576	0.123141	0.179836	0.0614293
51	0.382938	0.353466	0.515298	0.417234	0.0497646	0.274916	0.297706	0.422378	0.331667	0.0458303		51	0.115637	0.332838	0.157337	0.201937	0.0665481	0.115003	0.306598	0.12446	0.18202	0.0623486
51.5	0.385905	0.360703	0.510779	0.419129	0.0463989	0.278107	0.306199	0.427303	0.337203	0.0457741		51.5	0.114754	0.331419	0.155597	0.20059	0.0664686	0.115976	0.307645	0.125982	0.183201	0.062289
52	0.391236	0.365695	0.503917	0.420283	0.0424622	0.281751	0.31357	0.429785	0.341702	0.0449892		52	0.112824	0.345413	0.149092	0.202443	0.0722476	0.116799	0.311356	0.126518	0.184891	0.0632947
52.5	0.399833	0.379609	0.497073	0.425505	0.0362571	0.286189	0.322614	0.429914	0.346239	0.0431386		52.5	0.112947	0.361451	0.152621	0.209006	0.077078	0.118246	0.314251	0.128527	0.187008	0.0636907
53	0.406286	0.395994	0.494929	0.432403	0.0314039	0.289017	0.331565	0.434159	0.35158	0.0430775		53	0.113884	0.364727	0.152316	0.210309	0.078002	0.120121	0.315494	0.130956	0.188857	0.0633957
53.5	0.414523	0.402025	0.49667	0.437739	0.0296854	0.290973	0.341929	0.434471	0.355791	0.0420001		53.5	0.115944	0.362729	0.150619	0.209764	0.0771347	0.121674	0.315956	0.133351	0.190327	0.0629049
54	0.421882	0.408687	0.50364	0.444736	0.0296971	0.293103	0.34977	0.438601	0.360491	0.0423424		54	0.114457	0.36495	0.147039	0.208815	0.0786319	0.122806	0.318164	0.134442	0.191804	0.0632692
54.5	0.430379	0.418724	0.505405	0.451503	0.0271604	0.294158	0.357924	0.441062	0.364381	0.0425303		54.5	0.115858	0.358441	0.148009	0.207436	0.0760708	0.124261	0.318512	0.134466	0.192413	0.0631183
55	0.436059	0.437175	0.504254	0.459163	0.022548	0.294298	0.366461	0.445646	0.368802	0.0437061		55	0.118267	0.353085	0.14867	0.206674	0.0737297	0.125392	0.316694	0.134233	0.192106	0.0623461
55.5	0.439186	0.454561	0.501946	0.465231	0.0188864	0.29361	0.374713	0.449633	0.372652	0.0450517		55.5	0.121082	0.348747	0.148287	0.206039	0.071785	0.126927	0.316273	0.134519	0.192573	0.0618888
56	0.4408	0.470922	0.50294	0.471554	0.0179411	0.294023	0.384225	0.452532	0.376927	0.0459029		56	0.117639	0.343957	0.146777	0.202791	0.0710824	0.127567	0.313462	0.134954	0.191994	0.0607713
56.5	0.442928	0.490901	0.506554	0.480128	0.0191408	0.296643	0.393975	0.454481	0.3817	0.0459754		56.5	0.121944	0.348277	0.145615	0.205279	0.071825	0.128374	0.313785	0.135956	0.192705	0.0605796
57	0.447236	0.506356	0.508204	0.487265	0.0200218	0.298592	0.403289	0.45894	0.38694	0.0470047		57	0.125216	0.350558	0.144849	0.206874	0.072065	0.128418	0.311514	0.137381	0.192438	0.0595944
57.5	0.448374	0.517745	0.50968	0.491933	0.0219036	0.298375	0.414971	0.458301	0.390549	0.0477543		57.5	0.119747	0.353563	0.146319	0.206543	0.0739091	0.127138	0.313057	0.138922	0.193039	0.0601053
58	0.446057	0.528762	0.508302	0.494374	0.0248698	0.295935	0.422909	0.462287	0.39371	0.0501919		58	0.115961	0.344796	0.144742	0.201833	0.0719627	0.126469	0.312315	0.140327	0.193037	0.059773
58.5	0.441826	0.536603	0.50911	0.495846	0.028152	0.294303	0.431226	0.466028	0.397186	0.0524132		58.5	0.116205	0.351023	0.142238	0.203155	0.0743148	0.125458	0.314221	0.141196	0.193625	0.0604689
59	0.434747	0.542398	0.512291	0.496479	0.0320661	0.29357	0.437235	0.467744	0.399516	0.0537003		59	0.115528	0.368661	0.138845	0.207678	0.0807724	0.12585	0.314558	0.141197	0.193868	0.0605072
59.5	0.42566	0.549464	0.514709	0.496611	0.0368669	0.293947	0.441804	0.472947	0.402899	0.055213		59.5	0.11395	0.373768	0.141795	0.209838	0.0823584	0.125624	0.31334	0.141095	0.193353	0.0601595
60	0.419605	0.55359	0.510925	0.494707	0.0395191	0.294105	0.44739	0.480528	0.407341	0.0574205		60	0.109183	0.351343	0.14021	0.200245	0.0760779	0.126868	0.312582	0.142459	0.19397	0.0594767
60.5	0.414771	0.554119	0.508515	0.492468	0.0410186	0.29424	0.452302	0.485718	0.410753	0.0590499		60.5	0.106369	0.329286	0.139367	0.191674	0.0694623	0.126889	0.310726	0.14422	0.193945	0.0586044
61	0.410647	0.558681	0.506126	0.491818	0.0433284	0.295156	0.458958	0.487231	0.413782	0.0598717		61	0.108004	0.329633	0.138184	0.19194	0.0693954	0.12832	0.30859	0.145876	0.194262	0.0573882
61.5	0.405876	0.563396	0.501334	0.490202	0.0458115	0.293772	0.46579	0.487755	0.415772	0.0613288		61.5	0.111435	0.331037	0.137508	0.193327	0.0692653	0.128481	0.309561	0.148162	0.195401	0.0573619
62	0.400815	0.56679	0.498567	0.488724	0.048165	0.291465	0.470864	0.490862	0.41773	0.0633961		62	0.109258	0.328114	0.137904	0.191759	0.0686773	0.128107	0.308587	0.14943	0.195375	0.0569399
62.5	0.391091	0.566789	0.494569	0.48415	0.0509865	0.290284	0.474346	0.487844	0.417491	0.0637229		62.5	0.109581	0.32595	0.135693	0.190408	0.0681889	0.127605	0.309376	0.151465	0.196149	0.0570311
63	0.375946	0.569015	0.491173	0.478711	0.0560814	0.288839	0.477887	0.48947	0.418732	0.0650325		63	0.108716	0.323774	0.134658	0.189049	0.0677773	0.127505	0.30978	0.154095	0.197127	0.0568473
63.5	0.36007	0.573247	0.479769	0.471029	0.0616939	0.287904	0.480273	0.489508	0.419228	0.0657163		63.5	0.110465	0.322528	0.13594	0.189644	0.0668476	0.127669	0.313258	0.156467	0.199131	0.0576657
64	0.34945	0.574729	0.472952	0.46571	0.0651332	0.288165	0.483885	0.492604	0.421551	0.0667406		64	0.111009	0.320876	0.135434	0.189106	0.066261	0.126668	0.316009	0.157966	0.200214	0.0585981
64.5	0.336183	0.573886	0.461053	0.457041	0.0686483	0.288387	0.488055	0.494966	0.423803	0.0677372		64.5	0.10848	0.310396	0.13484	0.184572	0.0633705	0.126488	0.312966	0.159543	0.199666	0.0574482
65	0.323951	0.566196	0.45454	0.448229	0.0700013	0.286785	0.494632	0.493183	0.424867	0.0690421		65	0.107258	0.30363	0.136117	0.182335	0.061217	0.125819	0.30757	0.161039	0.198143	0.0556503
65.5	0.313191	0.561697	0.446591	0.440493	0.0718023	0.284813	0.498042	0.489802	0.424219	0.0697436		65.5	0.111548	0.300751	0.139882	0.18406	0.0589159	0.126707	0.302117	0.163195	0.19734	0.0534371
66	0.304517	0.56229	0.441583	0.43613	0.0744626	0.282089	0.500889	0.486447	0.423142	0.0706494		66	0.117501	0.291318	0.143772	0.184197	0.0540947	0.127334	0.296108	0.165512	0.196318	0.0510977
66.5	0.295989	0.565797	0.43858	0.433455	0.077929	0.279097	0.502527	0.484538	0.422054	0.0716669		66.5	0.116317	0.281913	0.141513	0.179914	0.0515154	0.128182	0.29049	0.166842	0.195171	0.0489486
67	0.287656	0.568388	0.4278	0.427948	0.0810404	0.276292	0.504414	0.480912	0.420539	0.0724421		67	0.113203	0.279504	0.139413	0.177373	0.0516228	0.129569	0.285748	0.168428	0.194582	0.0469432
67.5	0.276699	0.569656	0.417762	0.421372	0.0845887	0.272757	0.503316	0.478387	0.418153	0.0730535		67.5	0.11059	0.27604	0.137409	0.17468	0.0512681	0.129862	0.283894	0.170439	0.194732	0.0460943
68	0.265701	0.57112	0.406427	0.414416	0.0882573	0.269162	0.503097	0.475058	0.415772	0.0737507		68	0.110818	0.254338	0.140334	0.168497	0.0437582	0.131593	0.27812	0.172609	0.194107	0.0436432
68.5	0.254988	0.566787	0.392658	0.404811	0.0902135	0.265945	0.504008	0.472869	0.414274	0.0747073		68.5	0.110761	0.2379	0.138047	0.162236	0.0386433	0.133557	0.275578	0.174336	0.19449	0.0422182
69	0.246739	0.560308	0.384209	0.397085	0.0907482	0.262453	0.502843	0.469002	0.411433	0.0751277		69	0.110863	0.227403	0.137141	0.158469	0.0352919	0.134267	0.273875	0.176732	0.194958	0.0413188
69.5	0.24041	0.553958	0.377563	0.390644	0.0907495	0.258195	0.500826	0.466393	0.408471	0.0757928		69.5	0.113396	0.218813	0.137102	0.156437	0.03193	0.13374	0.274839	0.179447	0.196009	0.041565
70	0.233511	0.551849	0.366933	0.384098	0.0922962	0.255658	0.49873	0.462458	0.405615	0.0757063		70	0.113165	0.216413	0.137292	0.155623	0.0311826	0.13435	0.271715	0.181427	0.195831	0.0403025
70.5	0.225779	0.552413	0.354346	0.377513	0.0949999	0.251657	0.494309	0.457244	0.40107	0.0754688		70.5	0.111974	0.208146	0.13894	0.15302	0.0286412	0.133315	0.270409	0.183542	0.195755	0.040044
71	0.219217	0.546517	0.348595	0.371443	0.0951715	0.247697	0.489216	0.455504	0.397472	0.0755174		71	0.108162	0.206337	0.137844	0.150781	0.0290695	0.133056	0.269014	0.185295	0.195788	0.0395968
71.5	0.213945	0.533128	0.341434	0.362836	0.0927595	0.243411	0.486148	0.451225	0.393595	0.0757655		71.5	0.106061	0.207374	0.138479	0.150638	0.0298717	0.134353	0.266324	0.185078	0.195252	0.0384349
72	0.205628	0.520984	0.333745	0.353452	0.0915672	0.239812	0.481494	0.447467	0.389591	0.0755309		72	0.108042	0.20678	0.138853	0.151225	0.0291668	0.134887	0.261197	0.185543	0.193876	0.0366998
72.5	0.193552	0.509983	0.325833	0.343123	0.0917539	0.236442	0.480214	0.442516	0.386391	0.07576		72.5	0.105655	0.199117	0.135354	0.146709	0.027571	0.134456	0.256713	0.185455	0.192208	0.0354537
73	0.185907	0.492409	0.313716	0.330677	0.088885	0.234229	0.474418	0.437513	0.382053	0.074676		73	0.10392	0.200172	0.133605	0.145899	0.0284574	0.133394	0.257068	0.186766	0.192409	0.0358129
73.5	0.179212	0.479993	0.298602	0.319269	0.0874407	0.230349	0.471918	0.4301	0.377456	0.0745374		73.5	0.105005	0.19653	0.132285	0.144607	0.0271298	0.133049	0.254916	0.188039	0.192001	0.0352357
74	0.173734	0.468543	0.29066	0.310979	0.0857083	0.226576	0.467141	0.422578	0.372098	0.0738896		74	0.103359	0.191202	0.130402	0.141654	0.0259747	0.131655	0.251878	0.188467	0.190667	0.0347228
74.5	0.170133	0.454711	0.285813	0.303552	0.082628	0.223536	0.461029	0.418029	0.367531	0.0730599		74.5	0.100903	0.187065	0.13148	0.139816	0.0252196	0.131093	0.248767	0.189131	0.189664	0.0339706
75	0.16636	0.443986	0.28265	0.297665	0.0804946	0.220545	0.455685	0.414544	0.363591	0.0725025		75	0.103999	0.18781	0.132621	0.141477	0.024596	0.131003	0.245684	0.190552	0.18908	0.0331137
75.5	0.161641	0.434669	0.278868	0.291726	0.0790782	0.217895	0.450847	0.41118	0.359974	0.0719565		75.5	0.103998	0.1828	0.128933	0.138577	0.0232536	0.130752	0.244067	0.190075	0.188298	0.0327233
76	0.156806	0.43089	0.273253	0.286983	0.0794185	0.215518	0.444597	0.407189	0.355768	0.0709516		76	0.103916	0.17735	0.128075	0.136447	0.0216079	0.129543	0.239908	0.189831	0.186427	0.0319051
76.5	0.151643	0.425575	0.268913	0.282044	0.0793494	0.212214	0.439554	0.404702	0.352157	0.0706909		76.5	0.105969	0.181107	0.127578	0.138218	0.0223334	0.129866	0.23531	0.18868	0.184619	0.0305067
77	0.147152	0.416863	0.259009	0.274341	0.0782354	0.208063	0.433266	0.401163	0.347497	0.0703304		77	0.110155	0.181052	0.123585	0.138264	0.0217424	0.128349	0.231743	0.187475	0.182522	0.0299498
77.5	0.141892	0.402367	0.252873	0.265711	0.0754661	0.2046	0.425945	0.393476	0.34134	0.0690097		77.5	0.105985	0.169554	0.123826	0.133122	0.0189302	0.127362	0.230754	0.186928	0.181681	0.0299618
78	0.140424	0.388416	0.253077	0.260639	0.0716889	0.201153	0.421921	0.388452	0.337175	0.068694		78	0.102645	0.157057	0.125333	0.128345	0.0157794	0.126442	0.226669	0.186225	0.179779	0.029112
78.5	0.138378	0.376757	0.25421	0.256448	0.0688232	0.197969	0.416662	0.382768	0.332466	0.0679567		78.5	0.102604	0.154679	0.121618	0.1263	0.015214	0.125014	0.221936	0.186489	0.177813	0.0283133
79	0.134204	0.36821	0.254046	0.252153	0.0675583	0.195054	0.410406	0.380184	0.328548	0.0673148		79	0.103495	0.149392	0.122751	0.125213	0.0133064	0.124219	0.220274	0.187686	0.177393	0.0282022
79.5	0.12771	0.35165	0.251195	0.243518	0.0647598	0.192951	0.402558	0.376438	0.323982	0.0659481		79.5	0.102265	0.145132	0.123766	0.123721	0.0123747	0.122969	0.218358	0.18774	0.176356	0.0281186
80	0.122749	0.341499	0.244982	0.23641	0.063293	0.190849	0.396691	0.371192	0.319577	0.0647837		80	0.10166	0.145738	0.124988	0.124129	0.0127315	0.121747	0.214271	0.186374	0.174131	0.0274019
80.5	0.118795	0.33783	0.237691	0.231439	0.0633072	0.18843	0.391037	0.361707	0.313725	0.0632169		80.5	0.102461	0.148539	0.12098	0.123993	0.0133866	0.120496	0.210546	0.185076	0.172039	0.0268
81	0.115534	0.334625	0.234985	0.228381	0.0633323	0.184572	0.383491	0.354372	0.307478	0.0620254		81	0.104848	0.144082	0.117217	0.122049	0.0115807	0.120335	0.207613	0.184758	0.170902	0.0261301
81.5	0.111808	0.331877	0.233334	0.225673	0.0636438	0.180562	0.375886	0.347154	0.301201	0.0608869		81.5	0.101247	0.146293	0.116166	0.121235	0.0132484	0.120198	0.207517	0.185377	0.171031	0.0262076
82	0.107765	0.331456	0.22972	0.22298	0.0646619	0.176823	0.369605	0.339145	0.295191	0.0598336		82	0.099704	0.147198	0.116885	0.121262	0.0138839	0.119014	0.20622	0.185113	0.170116	0.0262673
82.5	0.103101	0.325747	0.223383	0.21741	0.0643417	0.172662	0.362357	0.334139	0.289719	0.0590928		82.5	0.1011	0.145051	0.118231	0.121461	0.0127899	0.117987	0.204702	0.184553	0.169081	0.0262006
83	0.099815	0.317171	0.217917	0.211634	0.0628239	0.168853	0.353491	0.327797	0.28338	0.057742		83	0.101789	0.141942	0.116392	0.120041	0.0117339	0.117105	0.202958	0.18394	0.168001	0.0260335
83.5	0.097341	0.309521	0.214906	0.207256	0.0613704	0.165523	0.342593	0.322808	0.276975	0.0560178		83.5	0.106087	0.137126	0.115497	0.11957	0.0091887	0.117465	0.200672	0.181694	0.16661	0.025176
84	0.096014	0.301426	0.208745	0.202062	0.0593914	0.161719	0.334297	0.316853	0.270956	0.0548503		84	0.088917	0.137577	0.114171	0.113555	0.0140503	0.098574	0.196997	0.180678	0.15875	0.0304544
84.5	0.093838	0.296825	0.204174	0.198279	0.0586714	0.158681	0.32724	0.311969	0.265963	0.053822		84.5	0.084138	0.135846	0.112765	0.110916	0.0149554	0.095038	0.189516	0.179178	0.154577	0.0299189
85	0.09069	0.2844	0.198382	0.191157	0.0560358	0.155874	0.319739	0.309383	0.261665	0.0529801		85	0.083284	0.135196	0.110219	0.109566	0.0149893	0.094105	0.187847	0.175645	0.152532	0.0294253
85.5	0.086809	0.271903	0.191825	0.183512	0.0535934	0.151878	0.312423	0.304151	0.256151	0.052191		85.5	0.086503	0.133832	0.107209	0.109181	0.0136982	0.093243	0.185891	0.172421	0.150518	0.0289005
86	0.085896	0.262499	0.184688	0.177694	0.0511007	0.148445	0.306313	0.294694	0.249817	0.050797		86	0.087323	0.12632	0.103451	0.105698	0.0113134	0.09178	0.182701	0.170122	0.148201	0.0284432
86.5	0.084261	0.254954	0.181154	0.173456	0.0494249	0.144085	0.298266	0.288647	0.243666	0.0498679		86.5	0.087463	0.123761	0.104014	0.105079	0.0104919	0.091156	0.180465	0.168717	0.146779	0.0280177
87	0.08154	0.247077	0.174993	0.16787	0.047919	0.140317	0.292307	0.284405	0.23901	0.049399		87	0.08454	0.12206	0.105279	0.10396	0.0108512	0.089769	0.177264	0.165336	0.144123	0.0273943
87.5	0.079002	0.244011	0.171834	0.164949	0.0477582	0.136787	0.286871	0.275997	0.233218	0.0483177		87.5	0.081183	0.121097	0.10009	0.10079	0.0115275	0.088232	0.17416	0.157654	0.140015	0.0263265
88	0.076276	0.240088	0.171607	0.162657	0.0474997	0.133458	0.281413	0.272654	0.229175	0.0479252		88	0.080754	0.1166	0.090164	0.0958393	0.0107299	0.085833	0.171412	0.139488	0.132244	0.0249686
88.5	0.074824	0.237165	0.16959	0.160526	0.0470824	0.131081	0.275764	0.266628	0.224491	0.0467794		88.5	0.07703	0.107677	0.08678	0.0904957	0.00903999	0.084743	0.171094	0.136937	0.130925	0.025108
89	0.073954	0.237471	0.165857	0.159094	0.0473243	0.129014	0.269398	0.25927	0.219227	0.0452013		89	0.074214	0.104225	0.082199	0.0868793	0.00897393	0.084012	0.167943	0.134586	0.128847	0.0243981
89.5	0.073263	0.236301	0.162684	0.157416	0.0471387	0.126896	0.262989	0.251515	0.2138	0.0435781		89.5	0.073674	0.100254	0.083073	0.085667	0.00778183	0.083666	0.165584	0.132241	0.127164	0.0237836
90	0.070006	0.233698	0.159775	0.154493	0.0473276	0.125053	0.258863	0.247695	0.210537	0.0428634		90	0.073276	0.105218	0.081649	0.0867143	0.00956236	0.082592	0.160016	0.129117	0.123908	0.0225016
90.5	0.068209	0.227875	0.155117	0.1504	0.0461519	0.122905	0.253414	0.243101	0.206473	0.0418901		90.5	0.072002	0.10357	0.081512	0.0856947	0.00934979	0.081014	0.155385	0.126688	0.121029	0.0216547
91	0.066796	0.223367	0.148211	0.146125	0.0452102	0.120089	0.247281	0.237492	0.201621	0.0408637		91	0.069756	0.097441	0.078406	0.0818677	0.00817725	0.078977	0.152585	0.123896	0.118486	0.0214203
91.5	0.064445	0.216355	0.146014	0.142271	0.0438925	0.117191	0.24131	0.232495	0.196999	0.0399849		91.5	0.06785	0.090169	0.071714	0.0765777	0.0068866	0.0771	0.149253	0.121244	0.115866	0.0210017
92	0.061239	0.208145	0.141849	0.137078	0.0424752	0.114148	0.23715	0.228896	0.193398	0.0396966		92	0.066228	0.089195	0.070158	0.0751937	0.007092	0.075895	0.144829	0.118863	0.113196	0.0201003
92.5	0.059119	0.19997	0.138308	0.132466	0.040765	0.111202	0.23272	0.226493	0.190138	0.0395091		92.5	0.067754	0.088229	0.067299	0.0744273	0.00690208	0.075101	0.142075	0.115435	0.11087	0.019468
93	0.057719	0.197827	0.133333	0.129626	0.0404881	0.109125	0.228078	0.224832	0.187345	0.0391212		93	0.067766	0.087058	0.066856	0.0738933	0.00658757	0.073484	0.138638	0.112201	0.108108	0.0189194
93.5	0.056619	0.199051	0.130152	0.128607	0.0411238	0.107198	0.224634	0.218327	0.183386	0.0381377		93.5	0.067106	0.085711	0.064719	0.072512	0.00663538	0.070563	0.135178	0.108612	0.104784	0.0187507
94	0.05455	0.197258	0.130304	0.127371	0.0412224	0.105188	0.220237	0.215393	0.180273	0.0375684		94	0.067247	0.083221	0.062087	0.0708517	0.00636152	0.067952	0.131317	0.10602	0.101763	0.0184153
94.5	0.051163	0.190298	0.129684	0.123715	0.0402755	0.099253	0.214215	0.209391	0.174286	0.0375425		94.5	0.064976	0.074852	0.062659	0.0674957	0.00373849	0.066459	0.127927	0.103858	0.0994147	0.0178828
95	0.049543	0.182651	0.13217	0.121455	0.0387967	0.09496	0.20833	0.204291	0.169194	0.0371351		95	0.062283	0.077473	0.058876	0.0662107	0.00571641	0.06431	0.125169	0.099778	0.096419	0.0176486
95.5	0.049284	0.173877	0.130644	0.117935	0.0365239	0.092006	0.201924	0.203136	0.165689	0.036843		95.5	0.059073	0.082176	0.056971	0.0660733	0.00807417	0.061948	0.121449	0.09584	0.093079	0.0172318
96	0.050354	0.163631	0.129485	0.11449	0.0335488	0.089773	0.197445	0.197159	0.161459	0.0358431		96	0.052631	0.080017	0.055551	0.062733	0.00868301	0.05599	0.117057	0.091945	0.0883307	0.0177209
96.5	0.051375	0.155815	0.127198	0.111463	0.0311589	0.087875	0.193658	0.192272	0.157935	0.0350323		96.5	0.045931	0.076956	0.054946	0.0592777	0.0092143	0.04824	0.115253	0.090497	0.0846633	0.0195637
97	0.050288	0.146589	0.124304	0.10706	0.029106	0.08621	0.187937	0.185566	0.153238	0.0335208		97	0.039993	0.071759	0.044366	0.0520393	0.00994032	0.04409	0.110777	0.075428	0.076765	0.0192625
97.5	0.045613	0.139143	0.119648	0.101468	0.0284889	0.080107	0.181336	0.180946	0.147463	0.0336782		97.5	0.037514	0.062976	0.036779	0.0457563	0.00861245	0.043085	0.108587	0.061016	0.070896	0.0195434
98	0.039278	0.13488	0.113162	0.0957733	0.028935	0.071266	0.175965	0.174862	0.140698	0.0347173		98	0.037666	0.05458	0.033677	0.0419743	0.00640716	0.041059	0.107492	0.058942	0.0691643	0.019847
98.5	0.038565	0.130725	0.106204	0.0918313	0.0275578	0.070309	0.171257	0.174026	0.138531	0.0341202		98.5	0.03762	0.051773	0.0316	0.040331	0.00597912	0.037524	0.105719	0.056117	0.0664533	0.0203533
99	0.037812	0.124787	0.097845	0.0868147	0.0257061	0.068725	0.166845	0.171469	0.13568	0.0335039		99	0.03618	0.05319	0.028786	0.0393853	0.00722483	0.036245	0.103099	0.053205	0.064183	0.0200645
99.5	0.037342	0.120082	0.090015	0.0824797	0.0241803	0.0677	0.161502	0.166445	0.131882	0.0321229		99.5	0.033502	0.059613	0.019852	0.0376557	0.0116644	0.035145	0.103236	0.037819	0.0587333	0.0222647
100	0.036399	0.1148	0.086239	0.079146	0.0229086	0.066639	0.156597	0.164155	0.12913	0.0313217		100	0.032013	0.056086	0.003932	0.030677	0.0150704	0.03282	0.102074	0.007614	0.0475027	0.0282392

## Sheet: Figure 2D
	% of total intensity (in mDC)										% of total intensity (in mDC + CK666)
	siglec				actin						siglec				actin
Distance from cell centre (% of radius)	Experiment 1	Experiment 2	average	SEM	Experiment 1	Experiment 2	average	SEM		Distance from cell centre (% of radius)	Experiment 1	Experiment 2	average	SEM	Experiment 1	Experiment 2	average	SEM
0.005	0.001123	0.002594	0.0018585	0.0007355	0.000677	0.000688	0.0006825	5.5e-06		0.005	0.00047	0.00161	0.00104	0.00057	0.001007	0.000803	0.000905	0.000102
0.01	0.001108	0.006664	0.003886	0.002778	0.001807	0.001788	0.0017975	9.5e-06		0.01	0.001209	0.004214	0.0027115	0.0015025	0.002532	0.001969	0.0022505	0.0002815
0.015	0.002275	0.012698	0.0074865	0.0052115	0.003343	0.00309	0.0032165	0.0001265		0.015	0.002216	0.006873	0.0045445	0.0023285	0.004119	0.003493	0.003806	0.000313
0.02	0.003387	0.017817	0.010602	0.007215	0.004833	0.004753	0.004793	4e-05		0.02	0.003397	0.009726	0.0065615	0.0031645	0.005916	0.00514	0.005528	0.000388
0.025	0.004599	0.023255	0.013927	0.009328	0.006176	0.006182	0.006179	3e-06		0.025	0.004288	0.012753	0.0085205	0.0042325	0.00772	0.006752	0.007236	0.000484
0.03	0.005404	0.031378	0.018391	0.012987	0.007515	0.007468	0.0074915	2.35e-05		0.03	0.004915	0.017726	0.0113205	0.0064055	0.008918	0.008425	0.0086715	0.0002465
0.035	0.006566	0.039874	0.02322	0.016654	0.00913	0.008579	0.0088545	0.0002755		0.035	0.005692	0.022812	0.014252	0.00856	0.009982	0.009825	0.0099035	7.85e-05
0.04	0.008275	0.044863	0.026569	0.018294	0.010868	0.010142	0.010505	0.000363		0.04	0.006428	0.02858	0.017504	0.011076	0.011509	0.011699	0.011604	9.5e-05
0.045	0.010267	0.049552	0.0299095	0.0196425	0.012643	0.011192	0.0119175	0.0007255		0.045	0.007231	0.03274	0.0199855	0.0127545	0.012944	0.012826	0.012885	5.9e-05
0.05	0.012041	0.054903	0.033472	0.021431	0.014526	0.012273	0.0133995	0.0011265		0.05	0.007941	0.03818	0.0230605	0.0151195	0.014208	0.014086	0.014147	6.1e-05
0.055	0.012344	0.060115	0.0362295	0.0238855	0.016034	0.013722	0.014878	0.001156		0.055	0.009214	0.042286	0.02575	0.016536	0.01552	0.01549	0.015505	1.5e-05
0.06	0.013479	0.065278	0.0393785	0.0258995	0.017379	0.015674	0.0165265	0.0008525		0.06	0.010531	0.049957	0.030244	0.019713	0.016446	0.017379	0.0169125	0.0004665
0.065	0.015436	0.067954	0.041695	0.026259	0.018606	0.017223	0.0179145	0.0006915		0.065	0.011996	0.056646	0.034321	0.022325	0.017531	0.018519	0.018025	0.000494
0.07	0.017346	0.069772	0.043559	0.026213	0.020027	0.018822	0.0194245	0.0006025		0.07	0.013901	0.060124	0.0370125	0.0231115	0.019171	0.019366	0.0192685	9.75e-05
0.075	0.018681	0.072141	0.045411	0.02673	0.021455	0.020407	0.020931	0.000524		0.075	0.014825	0.061171	0.037998	0.023173	0.020541	0.020538	0.0205395	1.5e-06
0.08	0.019968	0.076199	0.0480835	0.0281155	0.023433	0.021948	0.0226905	0.0007425		0.08	0.014162	0.061256	0.037709	0.023547	0.021936	0.021564	0.02175	0.000186
0.085	0.020851	0.077865	0.049358	0.028507	0.025517	0.022665	0.024091	0.001426		0.085	0.014663	0.063352	0.0390075	0.0243445	0.02356	0.023106	0.023333	0.000227
0.09	0.021818	0.075943	0.0488805	0.0270625	0.02713	0.02295	0.02504	0.00209		0.09	0.015915	0.067422	0.0416685	0.0257535	0.025056	0.025098	0.025077	2.1e-05
0.095	0.024094	0.077179	0.0506365	0.0265425	0.029069	0.023892	0.0264805	0.0025885		0.095	0.017787	0.069378	0.0435825	0.0257955	0.026735	0.026775	0.026755	2e-05
0.1	0.025354	0.076842	0.051098	0.025744	0.031107	0.024468	0.0277875	0.0033195		0.1	0.020136	0.068927	0.0445315	0.0243955	0.028462	0.028158	0.02831	0.000152
0.105	0.026406	0.074958	0.050682	0.024276	0.03349	0.024813	0.0291515	0.0043385		0.105	0.022689	0.069644	0.0461665	0.0234775	0.030599	0.029434	0.0300165	0.0005825
0.11	0.02733	0.074177	0.0507535	0.0234235	0.036339	0.025495	0.030917	0.005422		0.11	0.024586	0.072027	0.0483065	0.0237205	0.032319	0.030905	0.031612	0.000707
0.115	0.028942	0.073475	0.0512085	0.0222665	0.038249	0.026873	0.032561	0.005688		0.115	0.027165	0.073777	0.050471	0.023306	0.034515	0.032783	0.033649	0.000866
0.12	0.031183	0.072309	0.051746	0.020563	0.039161	0.028139	0.03365	0.005511		0.12	0.028491	0.073699	0.051095	0.022604	0.03564	0.034622	0.035131	0.000509
0.125	0.033793	0.075403	0.054598	0.020805	0.040963	0.028651	0.034807	0.006156		0.125	0.02914	0.070844	0.049992	0.020852	0.037004	0.035321	0.0361625	0.0008415
0.13	0.036696	0.080654	0.058675	0.021979	0.042767	0.030089	0.036428	0.006339		0.13	0.030768	0.070946	0.050857	0.020089	0.038225	0.036743	0.037484	0.000741
0.135	0.039771	0.080008	0.0598895	0.0201185	0.044473	0.030923	0.037698	0.006775		0.135	0.033171	0.074533	0.053852	0.020681	0.039831	0.038555	0.039193	0.000638
0.14	0.043163	0.076878	0.0600205	0.0168575	0.046577	0.032054	0.0393155	0.0072615		0.14	0.034786	0.076292	0.055539	0.020753	0.04111	0.039245	0.0401775	0.0009325
0.145	0.044541	0.077501	0.061021	0.01648	0.04844	0.032787	0.0406135	0.0078265		0.145	0.035545	0.079957	0.057751	0.022206	0.04263	0.040415	0.0415225	0.0011075
0.15	0.045245	0.080666	0.0629555	0.0177105	0.051028	0.033777	0.0424025	0.0086255		0.15	0.036737	0.079979	0.058358	0.021621	0.043557	0.041391	0.042474	0.001083
0.155	0.045225	0.08086	0.0630425	0.0178175	0.05242	0.034461	0.0434405	0.0089795		0.155	0.038549	0.079986	0.0592675	0.0207185	0.045531	0.042394	0.0439625	0.0015685
0.16	0.046013	0.082739	0.064376	0.018363	0.054205	0.03492	0.0445625	0.0096425		0.16	0.042292	0.08377	0.063031	0.020739	0.046964	0.043495	0.0452295	0.0017345
0.165	0.047722	0.08848	0.068101	0.020379	0.056023	0.035466	0.0457445	0.0102785		0.165	0.043283	0.087635	0.065459	0.022176	0.048063	0.045975	0.047019	0.001044
0.17	0.048905	0.090259	0.069582	0.020677	0.057404	0.03622	0.046812	0.010592		0.17	0.042224	0.091643	0.0669335	0.0247095	0.049563	0.047721	0.048642	0.000921
0.175	0.051085	0.089563	0.070324	0.019239	0.059323	0.037731	0.048527	0.010796		0.175	0.040825	0.097878	0.0693515	0.0285265	0.051429	0.04978	0.0506045	0.0008245
0.18	0.051609	0.088945	0.070277	0.018668	0.061263	0.03917	0.0502165	0.0110465		0.18	0.040847	0.103082	0.0719645	0.0311175	0.052565	0.050431	0.051498	0.001067
0.185	0.05273	0.09191	0.07232	0.01959	0.062968	0.040077	0.0515225	0.0114455		0.185	0.040358	0.104656	0.072507	0.032149	0.053771	0.051913	0.052842	0.000929
0.19	0.055105	0.095663	0.075384	0.020279	0.065226	0.041329	0.0532775	0.0119485		0.19	0.04006	0.107156	0.073608	0.033548	0.054652	0.053208	0.05393	0.000722
0.195	0.058588	0.10282	0.080704	0.022116	0.06744	0.042924	0.055182	0.012258		0.195	0.039728	0.112292	0.07601	0.036282	0.055756	0.053713	0.0547345	0.0010215
0.2	0.063001	0.111196	0.0870985	0.0240975	0.06977	0.044548	0.057159	0.012611		0.2	0.040554	0.112572	0.076563	0.036009	0.057234	0.05456	0.055897	0.001337
0.205	0.066075	0.112456	0.0892655	0.0231905	0.071344	0.045795	0.0585695	0.0127745		0.205	0.042558	0.112405	0.0774815	0.0349235	0.058853	0.054962	0.0569075	0.0019455
0.21	0.069415	0.111168	0.0902915	0.0208765	0.072646	0.047233	0.0599395	0.0127065		0.21	0.04381	0.112839	0.0783245	0.0345145	0.059653	0.055524	0.0575885	0.0020645
0.215	0.073183	0.110265	0.091724	0.018541	0.075178	0.049333	0.0622555	0.0129225		0.215	0.044712	0.111913	0.0783125	0.0336005	0.060722	0.057066	0.058894	0.001828
0.22	0.077462	0.111413	0.0944375	0.0169755	0.077472	0.051511	0.0644915	0.0129805		0.22	0.047425	0.111516	0.0794705	0.0320455	0.062291	0.059618	0.0609545	0.0013365
0.225	0.078504	0.116574	0.097539	0.019035	0.080523	0.052467	0.066495	0.014028		0.225	0.051006	0.110148	0.080577	0.029571	0.064185	0.061719	0.062952	0.001233
0.23	0.081287	0.128315	0.104801	0.023514	0.083001	0.053989	0.068495	0.014506		0.23	0.051783	0.108728	0.0802555	0.0284725	0.066021	0.063399	0.06471	0.001311
0.235	0.085201	0.136435	0.110818	0.025617	0.085669	0.055586	0.0706275	0.0150415		0.235	0.054084	0.108968	0.081526	0.027442	0.068053	0.064049	0.066051	0.002002
0.24	0.088235	0.134332	0.111284	0.0230485	0.087197	0.056758	0.0719775	0.0152195		0.24	0.056163	0.1084	0.0822815	0.0261185	0.069998	0.064606	0.067302	0.002696
0.245	0.090987	0.132564	0.111775	0.0207885	0.088875	0.056782	0.0728285	0.0160465		0.245	0.059895	0.109675	0.084785	0.02489	0.071714	0.066883	0.0692985	0.0024155
0.25	0.093846	0.134693	0.114269	0.0204235	0.091857	0.056697	0.074277	0.01758		0.25	0.062818	0.112597	0.0877075	0.0248895	0.073979	0.069173	0.071576	0.002403
0.255	0.097395	0.139148	0.118272	0.0208765	0.096192	0.058052	0.077122	0.01907		0.255	0.066251	0.111263	0.088757	0.022506	0.075959	0.072837	0.074398	0.001561
0.26	0.102826	0.139444	0.121135	0.018309	0.099297	0.05926	0.0792785	0.0200185		0.26	0.068858	0.107513	0.0881855	0.0193275	0.078413	0.074341	0.076377	0.002036
0.265	0.107019	0.135082	0.121051	0.0140315	0.101212	0.060959	0.0810855	0.0201265		0.265	0.071933	0.106761	0.089347	0.017414	0.079875	0.075567	0.077721	0.002154
0.27	0.10893	0.135926	0.122428	0.013498	0.104065	0.063873	0.083969	0.020096		0.27	0.075147	0.112071	0.093609	0.018462	0.081754	0.076099	0.0789265	0.0028275
0.275	0.1126	0.139069	0.125835	0.0132345	0.106711	0.065433	0.086072	0.020639		0.275	0.079074	0.114935	0.0970045	0.0179305	0.082926	0.077025	0.0799755	0.0029505
0.28	0.116691	0.138992	0.127841	0.0111505	0.109542	0.066784	0.088163	0.021379		0.28	0.082315	0.118297	0.100306	0.017991	0.085187	0.079306	0.0822465	0.0029405
0.285	0.123802	0.134295	0.129049	0.0052465	0.112739	0.068356	0.0905475	0.0221915		0.285	0.083952	0.118516	0.101234	0.017282	0.086813	0.082287	0.08455	0.002263
0.29	0.124958	0.135723	0.13034	0.0053825	0.115711	0.071142	0.0934265	0.0222845		0.29	0.086094	0.118688	0.102391	0.016297	0.089539	0.083913	0.086726	0.002813
0.295	0.122786	0.141071	0.131929	0.0091425	0.118033	0.073632	0.0958325	0.0222005		0.295	0.088911	0.11674	0.102826	0.0139145	0.092179	0.087061	0.08962	0.002559
0.3	0.123255	0.138215	0.130735	0.00748	0.12078	0.075437	0.0981085	0.0226715		0.3	0.089906	0.117013	0.10346	0.0135535	0.095444	0.090564	0.093004	0.00244
0.305	0.123622	0.133167	0.128394	0.0047725	0.122394	0.076696	0.099545	0.022849		0.305	0.092753	0.118543	0.105648	0.012895	0.097528	0.093179	0.0953535	0.0021745
0.31	0.124022	0.130159	0.12709	0.0030685	0.125371	0.078315	0.101843	0.023528		0.31	0.096584	0.119061	0.107823	0.0112385	0.100722	0.095571	0.0981465	0.0025755
0.315	0.127404	0.129725	0.128564	0.0011605	0.127738	0.080193	0.103965	0.0237725		0.315	0.099604	0.120004	0.109804	0.0102	0.102553	0.098413	0.100483	0.00207
0.32	0.127211	0.134538	0.130875	0.0036635	0.128837	0.082498	0.105667	0.0231695		0.32	0.101483	0.123047	0.112265	0.010782	0.104575	0.099649	0.102112	0.002463
0.325	0.130169	0.140944	0.135557	0.0053875	0.132154	0.084718	0.108436	0.023718		0.325	0.106525	0.13156	0.119042	0.0125175	0.107232	0.102993	0.105112	0.0021195
0.33	0.130531	0.146404	0.138468	0.0079365	0.135184	0.086047	0.110616	0.0245685		0.33	0.110222	0.140011	0.125116	0.0148945	0.109145	0.104971	0.107058	0.002087
0.335	0.134953	0.151112	0.143033	0.0080795	0.137126	0.088286	0.112706	0.02442		0.335	0.111781	0.142198	0.12699	0.0152085	0.111042	0.109401	0.110222	0.0008205
0.34	0.139729	0.154127	0.146928	0.007199	0.139633	0.090906	0.115269	0.0243635		0.34	0.114778	0.143672	0.129225	0.014447	0.114069	0.114243	0.114156	8.7e-05
0.345	0.14325	0.155987	0.149618	0.0063685	0.142577	0.094325	0.118451	0.024126		0.345	0.117094	0.147994	0.132544	0.01545	0.117966	0.11687	0.117418	0.000548
0.35	0.14667	0.159353	0.153011	0.0063415	0.14617	0.09757	0.12187	0.0243		0.35	0.118587	0.15433	0.136458	0.0178715	0.120974	0.120582	0.120778	0.000196
0.355	0.150389	0.162571	0.15648	0.006091	0.148629	0.100124	0.124377	0.0242525		0.355	0.123683	0.159372	0.141528	0.0178445	0.124434	0.123957	0.124196	0.0002385
0.36	0.1499	0.166963	0.158432	0.0085315	0.150974	0.101671	0.126323	0.0246515		0.36	0.125229	0.159998	0.142614	0.0173845	0.126476	0.127378	0.126927	0.000451
0.365	0.150144	0.166134	0.158139	0.007995	0.154361	0.103528	0.128944	0.0254165		0.365	0.125907	0.161789	0.143848	0.017941	0.128122	0.132061	0.130092	0.0019695
0.37	0.151377	0.16536	0.158369	0.0069915	0.156807	0.105447	0.131127	0.02568		0.37	0.124745	0.16778	0.146263	0.0215175	0.131165	0.135605	0.133385	0.00222
0.375	0.154179	0.169604	0.161892	0.0077125	0.159312	0.107916	0.133614	0.025698		0.375	0.126181	0.177168	0.151674	0.0254935	0.133909	0.139154	0.136532	0.0026225
0.38	0.157398	0.17534	0.166369	0.008971	0.162141	0.110018	0.13608	0.0260615		0.38	0.129514	0.179436	0.154475	0.024961	0.137309	0.143609	0.140459	0.00315
0.385	0.164713	0.179676	0.172195	0.0074815	0.165797	0.112856	0.139326	0.0264705		0.385	0.136629	0.182907	0.159768	0.023139	0.14299	0.148968	0.145979	0.002989
0.39	0.173628	0.18502	0.179324	0.005696	0.168766	0.115974	0.14237	0.026396		0.39	0.137597	0.188336	0.162967	0.0253695	0.145823	0.152368	0.149095	0.0032725
0.395	0.179418	0.186065	0.182742	0.0033235	0.171917	0.11884	0.145378	0.0265385		0.395	0.144471	0.19007	0.16727	0.0227995	0.149112	0.15736	0.153236	0.004124
0.4	0.180096	0.191147	0.185621	0.0055255	0.176416	0.122099	0.149257	0.0271585		0.4	0.153288	0.189919	0.171604	0.0183155	0.154144	0.163088	0.158616	0.004472
0.405	0.179268	0.197148	0.188208	0.00894	0.180561	0.125163	0.152862	0.027699		0.405	0.162595	0.185613	0.174104	0.011509	0.160357	0.170749	0.165553	0.005196
0.41	0.180239	0.201503	0.190871	0.010632	0.185646	0.128119	0.156883	0.0287635		0.41	0.172071	0.186763	0.179417	0.007346	0.165054	0.177756	0.171405	0.006351
0.415	0.183866	0.208603	0.196235	0.0123685	0.190466	0.130758	0.160612	0.029854		0.415	0.179046	0.194901	0.186974	0.0079275	0.170756	0.183527	0.177142	0.0063855
0.42	0.187921	0.217483	0.202702	0.014781	0.194616	0.133136	0.163876	0.03074		0.42	0.182595	0.203244	0.19292	0.0103245	0.175495	0.188632	0.182063	0.0065685
0.425	0.193309	0.218947	0.206128	0.012819	0.197692	0.135894	0.166793	0.030899		0.425	0.184467	0.205889	0.195178	0.010711	0.179453	0.194671	0.187062	0.007609
0.43	0.204277	0.216733	0.210505	0.006228	0.200885	0.139117	0.170001	0.030884		0.43	0.19078	0.216334	0.203557	0.012777	0.184564	0.200003	0.192283	0.0077195
0.435	0.20995	0.220836	0.215393	0.005443	0.204706	0.141988	0.173347	0.031359		0.435	0.200803	0.223983	0.212393	0.01159	0.190141	0.204249	0.197195	0.007054
0.44	0.217171	0.228674	0.222922	0.0057515	0.208361	0.145674	0.177017	0.0313435		0.44	0.210945	0.231864	0.221405	0.0104595	0.194936	0.209741	0.202339	0.0074025
0.445	0.224079	0.230804	0.227442	0.0033625	0.213085	0.150188	0.181636	0.0314485		0.445	0.220459	0.237376	0.228917	0.0084585	0.202069	0.21315	0.20761	0.0055405
0.45	0.233924	0.228222	0.231073	0.002851	0.217714	0.153763	0.185739	0.0319755		0.45	0.229928	0.245353	0.23764	0.0077125	0.206696	0.217411	0.212054	0.0053575
0.455	0.244442	0.229146	0.236794	0.007648	0.222488	0.157801	0.190144	0.0323435		0.455	0.233398	0.251674	0.242536	0.009138	0.21089	0.224481	0.217686	0.0067955
0.46	0.254508	0.237902	0.246205	0.008303	0.226673	0.161706	0.19419	0.0324835		0.46	0.239889	0.255084	0.247486	0.0075975	0.21872	0.231481	0.2251	0.0063805
0.465	0.26598	0.241845	0.253912	0.0120675	0.231351	0.165841	0.198596	0.032755		0.465	0.247382	0.26027	0.253826	0.006444	0.22787	0.238845	0.233357	0.0054875
0.47	0.276388	0.241671	0.25903	0.0173585	0.238526	0.169994	0.20426	0.034266		0.47	0.258476	0.268381	0.263428	0.0049525	0.238071	0.244321	0.241196	0.003125
0.475	0.285711	0.242697	0.264204	0.021507	0.245266	0.173442	0.209354	0.035912		0.475	0.265272	0.280447	0.27286	0.0075875	0.245571	0.251886	0.248729	0.0031575
0.48	0.289849	0.24702	0.268435	0.0214145	0.250881	0.177647	0.214264	0.036617		0.48	0.267877	0.286062	0.276969	0.0090925	0.250591	0.26041	0.255501	0.0049095
0.485	0.300279	0.25733	0.278805	0.0214745	0.256986	0.182639	0.219812	0.0371735		0.485	0.277826	0.291928	0.284877	0.007051	0.256653	0.266837	0.261745	0.005092
0.49	0.310288	0.259627	0.284957	0.0253305	0.264441	0.186309	0.225375	0.039066		0.49	0.286871	0.302493	0.294682	0.007811	0.26624	0.271259	0.268749	0.0025095
0.495	0.32114	0.249517	0.285328	0.0358115	0.271218	0.191083	0.231151	0.0400675		0.495	0.290632	0.310481	0.300557	0.0099245	0.275502	0.275152	0.275327	0.000175
0.5	0.333879	0.242798	0.288338	0.0455405	0.280326	0.19633	0.238328	0.041998		0.5	0.296734	0.312038	0.304386	0.007652	0.285288	0.27972	0.282504	0.002784
0.505	0.342328	0.241634	0.291981	0.050347	0.288125	0.201876	0.245001	0.0431245		0.505	0.306746	0.308609	0.307678	0.0009315	0.295006	0.282465	0.288736	0.0062705
0.51	0.353466	0.24464	0.299053	0.054413	0.297706	0.20797	0.252838	0.044868		0.51	0.311819	0.310979	0.311399	0.00042	0.302403	0.285275	0.293839	0.008564
0.515	0.360703	0.253299	0.307001	0.053702	0.306199	0.213466	0.259833	0.0463665		0.515	0.31465	0.316897	0.315773	0.0011235	0.30716	0.287561	0.297361	0.0097995
0.52	0.365695	0.259903	0.312799	0.052896	0.31357	0.219199	0.266385	0.0471855		0.52	0.31564	0.322929	0.319284	0.0036445	0.315105	0.292266	0.303686	0.0114195
0.525	0.379609	0.261866	0.320738	0.0588715	0.322614	0.22406	0.273337	0.049277		0.525	0.319032	0.323118	0.321075	0.002043	0.321682	0.29581	0.308746	0.012936
0.53	0.395994	0.262768	0.329381	0.066613	0.331565	0.230607	0.281086	0.050479		0.53	0.325477	0.321222	0.32335	0.0021275	0.330576	0.29842	0.314498	0.016078
0.535	0.402025	0.269747	0.335886	0.066139	0.341929	0.23599	0.288959	0.0529695		0.535	0.331666	0.327153	0.32941	0.0022565	0.339671	0.299921	0.319796	0.019875
0.54	0.408687	0.272808	0.340747	0.0679395	0.34977	0.241861	0.295816	0.0539545		0.54	0.332536	0.334492	0.333514	0.000978	0.347709	0.303847	0.325778	0.021931
0.545	0.418724	0.270471	0.344598	0.0741265	0.357924	0.247415	0.30267	0.0552545		0.545	0.339294	0.333851	0.336572	0.0027215	0.354859	0.30832	0.331589	0.0232695
0.55	0.437175	0.270995	0.354085	0.08309	0.366461	0.251291	0.308876	0.057585		0.55	0.345303	0.325497	0.3354	0.009903	0.363925	0.309616	0.33677	0.0271545
0.555	0.454561	0.278301	0.366431	0.08813	0.374713	0.256333	0.315523	0.05919		0.555	0.353277	0.320205	0.336741	0.016536	0.371725	0.311921	0.341823	0.029902
0.56	0.470922	0.284996	0.377959	0.092963	0.384225	0.260874	0.322549	0.0616755		0.56	0.36116	0.314426	0.337793	0.023367	0.379244	0.313973	0.346608	0.0326355
0.565	0.490901	0.280651	0.385776	0.105125	0.393975	0.266776	0.330376	0.0635995		0.565	0.364903	0.314352	0.339627	0.0252755	0.388604	0.31808	0.353342	0.035262
0.57	0.506356	0.267224	0.38679	0.119566	0.403289	0.271466	0.337377	0.0659115		0.57	0.366996	0.317291	0.342143	0.0248525	0.393217	0.321621	0.357419	0.035798
0.575	0.517745	0.259102	0.388424	0.129321	0.414971	0.27568	0.345325	0.0696455		0.575	0.374407	0.322532	0.348469	0.0259375	0.397599	0.322651	0.360125	0.037474
0.58	0.528762	0.260909	0.394836	0.133926	0.422909	0.280258	0.351583	0.0713255		0.58	0.383649	0.328375	0.356012	0.027637	0.403772	0.325295	0.364534	0.0392385
0.585	0.536603	0.266569	0.401586	0.135017	0.431226	0.285837	0.358532	0.0726945		0.585	0.387832	0.325285	0.356559	0.0312735	0.411847	0.324396	0.368121	0.0437255
0.59	0.542398	0.270723	0.40656	0.135838	0.437235	0.290989	0.364112	0.073123		0.59	0.395349	0.321006	0.358178	0.0371715	0.420317	0.325523	0.37292	0.047397
0.595	0.549464	0.272697	0.41108	0.138384	0.441804	0.296573	0.369188	0.0726155		0.595	0.406253	0.318298	0.362275	0.0439775	0.428371	0.327745	0.378058	0.050313
0.6	0.55359	0.282948	0.418269	0.135321	0.44739	0.301325	0.374358	0.0730325		0.6	0.413943	0.318377	0.36616	0.047783	0.432542	0.328248	0.380395	0.052147
0.605	0.554119	0.297575	0.425847	0.128272	0.452302	0.305677	0.378989	0.0733125		0.605	0.423361	0.32011	0.371735	0.0516255	0.438344	0.326005	0.382174	0.0561695
0.61	0.558681	0.308593	0.433637	0.125044	0.458958	0.309859	0.384408	0.0745495		0.61	0.436152	0.318576	0.377364	0.058788	0.445832	0.325688	0.38576	0.060072
0.615	0.563396	0.312965	0.43818	0.125216	0.46579	0.315261	0.390525	0.0752645		0.615	0.445642	0.328593	0.387118	0.0585245	0.452368	0.329443	0.390906	0.0614625
0.62	0.56679	0.312945	0.439867	0.126923	0.470864	0.319348	0.395106	0.075758		0.62	0.452669	0.340022	0.396346	0.0563235	0.460248	0.329802	0.395025	0.065223
0.625	0.566789	0.315057	0.440923	0.125866	0.474346	0.322995	0.39867	0.0756755		0.625	0.456137	0.344953	0.400545	0.055592	0.467612	0.329434	0.398523	0.069089
0.63	0.569015	0.308975	0.438995	0.13002	0.477887	0.324694	0.40129	0.0765965		0.63	0.462698	0.346302	0.4045	0.058198	0.473694	0.32923	0.401462	0.072232
0.635	0.573247	0.297042	0.435144	0.138102	0.480273	0.327787	0.40403	0.076243		0.635	0.474309	0.343105	0.408707	0.065602	0.478207	0.330536	0.404371	0.0738355
0.64	0.574729	0.299508	0.437119	0.13761	0.483885	0.33047	0.407177	0.0767075		0.64	0.487769	0.342544	0.415157	0.0726125	0.486135	0.332746	0.40944	0.0766945
0.645	0.573886	0.303466	0.438676	0.13521	0.488055	0.332927	0.410491	0.077564		0.645	0.505716	0.342985	0.424351	0.0813655	0.49121	0.330928	0.411069	0.080141
0.65	0.566196	0.301681	0.433939	0.132258	0.494632	0.33449	0.414561	0.080071		0.65	0.519934	0.343046	0.43149	0.088444	0.496252	0.329538	0.412895	0.083357
0.655	0.561697	0.297504	0.4296	0.132096	0.498042	0.337992	0.418017	0.080025		0.655	0.534914	0.333139	0.434026	0.100888	0.503181	0.332174	0.417678	0.0855035
0.66	0.56229	0.297039	0.429665	0.132625	0.500889	0.341897	0.421393	0.079496		0.66	0.542331	0.321387	0.431859	0.110472	0.509302	0.333587	0.421444	0.0878575
0.665	0.565797	0.295065	0.430431	0.135366	0.502527	0.345172	0.423849	0.0786775		0.665	0.548025	0.319387	0.433706	0.114319	0.512826	0.33485	0.423838	0.088988
0.67	0.568388	0.288521	0.428455	0.139933	0.504414	0.347925	0.426169	0.0782445		0.67	0.55831	0.328944	0.443627	0.114683	0.518732	0.335932	0.427332	0.0914
0.675	0.569656	0.281718	0.425687	0.143969	0.503316	0.350508	0.426912	0.076404		0.675	0.568624	0.331334	0.449979	0.118645	0.52369	0.337551	0.43062	0.0930695
0.68	0.57112	0.282016	0.426568	0.144552	0.503097	0.353879	0.428488	0.074609		0.68	0.582504	0.328481	0.455493	0.127012	0.528141	0.337369	0.432755	0.095386
0.685	0.566787	0.278182	0.422485	0.144302	0.504008	0.354414	0.429211	0.074797		0.685	0.587698	0.321968	0.454833	0.132865	0.534975	0.338113	0.436544	0.098431
0.69	0.560308	0.270404	0.415356	0.144952	0.502843	0.354759	0.428801	0.074042		0.69	0.592586	0.313065	0.452825	0.13976	0.537787	0.338998	0.438393	0.0993945
0.695	0.553958	0.267379	0.410668	0.143289	0.500826	0.356296	0.428561	0.072265		0.695	0.599206	0.309115	0.45416	0.145046	0.540132	0.337925	0.439028	0.101104
0.7	0.551849	0.271705	0.411777	0.140072	0.49873	0.358368	0.428549	0.070181		0.7	0.605429	0.31021	0.457819	0.147609	0.542809	0.338251	0.44053	0.102279
0.705	0.552413	0.278546	0.41548	0.136934	0.494309	0.359352	0.426831	0.0674785		0.705	0.611573	0.315302	0.463438	0.148135	0.546219	0.338674	0.442446	0.103773
0.71	0.546517	0.282997	0.414757	0.13176	0.489216	0.360939	0.425077	0.0641385		0.71	0.616701	0.31615	0.466426	0.150275	0.550042	0.339165	0.444604	0.105438
0.715	0.533128	0.277256	0.405192	0.127936	0.486148	0.363028	0.424588	0.06156		0.715	0.623168	0.31022	0.466694	0.156474	0.552037	0.336781	0.444409	0.107628
0.72	0.520984	0.280731	0.400857	0.120126	0.481494	0.365425	0.423459	0.0580345		0.72	0.626688	0.310283	0.468485	0.158202	0.555784	0.336696	0.44624	0.109544
0.725	0.509983	0.280901	0.395442	0.114541	0.480214	0.365655	0.422934	0.0572795		0.725	0.631965	0.30787	0.469917	0.162048	0.556306	0.334924	0.445615	0.110691
0.73	0.492409	0.278884	0.385647	0.106763	0.474418	0.365333	0.419876	0.0545425		0.73	0.63896	0.307473	0.473216	0.165744	0.555277	0.332913	0.444095	0.111182
0.735	0.479993	0.277013	0.378503	0.10149	0.471918	0.3668	0.419359	0.052559		0.735	0.634015	0.306596	0.470305	0.163709	0.554332	0.331079	0.442706	0.111627
0.74	0.468543	0.275071	0.371807	0.096736	0.467141	0.367266	0.417203	0.0499375		0.74	0.636825	0.295862	0.466344	0.170481	0.553778	0.328101	0.440939	0.112839
0.745	0.454711	0.264331	0.359521	0.09519	0.461029	0.366867	0.413948	0.047081		0.745	0.639955	0.289229	0.464592	0.175363	0.553027	0.326576	0.439802	0.113226
0.75	0.443986	0.262164	0.353075	0.090911	0.455685	0.367241	0.411463	0.044222		0.75	0.644661	0.287759	0.46621	0.178451	0.55173	0.324565	0.438148	0.113582
0.755	0.434669	0.266031	0.35035	0.084319	0.450847	0.366704	0.408775	0.0420715		0.755	0.647499	0.286287	0.466893	0.180606	0.548995	0.321097	0.435046	0.113949
0.76	0.43089	0.274549	0.352719	0.0781705	0.444597	0.366077	0.405337	0.03926		0.76	0.638102	0.281713	0.459907	0.178194	0.546367	0.316734	0.431551	0.114816
0.765	0.425575	0.280852	0.353213	0.0723615	0.439554	0.365096	0.402325	0.037229		0.765	0.635013	0.26874	0.451877	0.183137	0.543782	0.312609	0.428196	0.115586
0.77	0.416863	0.283189	0.350026	0.066837	0.433266	0.364193	0.398729	0.0345365		0.77	0.627174	0.252883	0.440029	0.187145	0.537964	0.304796	0.42138	0.116584
0.775	0.402367	0.28403	0.343198	0.0591685	0.425945	0.363063	0.394504	0.031441		0.775	0.61727	0.241245	0.429257	0.188013	0.533019	0.301636	0.417328	0.115692
0.78	0.388416	0.278646	0.333531	0.054885	0.421921	0.361214	0.391567	0.0303535		0.78	0.619233	0.235663	0.427448	0.191785	0.527518	0.298821	0.41317	0.114348
0.785	0.376757	0.270753	0.323755	0.053002	0.416662	0.357391	0.387026	0.0296355		0.785	0.612354	0.231828	0.422091	0.190263	0.520707	0.295648	0.408178	0.11253
0.79	0.36821	0.270714	0.319462	0.048748	0.410406	0.353295	0.38185	0.0285555		0.79	0.595772	0.231588	0.41368	0.182092	0.515681	0.292254	0.403967	0.111713
0.795	0.35165	0.269222	0.310436	0.041214	0.402558	0.350188	0.376373	0.026185		0.795	0.591441	0.230736	0.411088	0.180352	0.511837	0.288717	0.400277	0.11156
0.8	0.341499	0.281567	0.311533	0.029966	0.396691	0.346963	0.371827	0.024864		0.8	0.574741	0.236177	0.405459	0.169282	0.504788	0.28385	0.394319	0.110469
0.805	0.33783	0.288719	0.313275	0.0245555	0.391037	0.344813	0.367925	0.023112		0.805	0.563537	0.246199	0.404868	0.158669	0.499821	0.280331	0.390076	0.109745
0.81	0.334625	0.283446	0.309036	0.0255895	0.383491	0.341177	0.362334	0.021157		0.81	0.555323	0.250625	0.402974	0.152349	0.495905	0.275692	0.385798	0.110106
0.815	0.331877	0.263579	0.297728	0.034149	0.375886	0.336106	0.355996	0.01989		0.815	0.541189	0.252402	0.396796	0.144393	0.488802	0.271525	0.380163	0.108639
0.82	0.331456	0.249134	0.290295	0.041161	0.369605	0.330731	0.350168	0.019437		0.82	0.526037	0.246244	0.38614	0.139896	0.483221	0.266746	0.374984	0.108237
0.825	0.325747	0.247103	0.286425	0.039322	0.362357	0.323936	0.343147	0.0192105		0.825	0.514761	0.237898	0.376329	0.138432	0.476563	0.262832	0.369698	0.106865
0.83	0.317171	0.248994	0.283083	0.0340885	0.353491	0.317442	0.335467	0.0180245		0.83	0.510516	0.23266	0.371588	0.138928	0.471274	0.259994	0.365634	0.10564
0.835	0.309521	0.243129	0.276325	0.033196	0.342593	0.312124	0.327358	0.0152345		0.835	0.509137	0.226974	0.368055	0.141081	0.466011	0.257038	0.361525	0.104486
0.84	0.301426	0.231726	0.266576	0.03485	0.334297	0.305534	0.319916	0.0143815		0.84	0.496468	0.227082	0.361775	0.134693	0.459755	0.252718	0.356237	0.103519
0.845	0.296825	0.227063	0.261944	0.034881	0.32724	0.301861	0.31455	0.0126895		0.845	0.484324	0.226363	0.355343	0.12898	0.449814	0.248537	0.349175	0.100639
0.85	0.2844	0.225892	0.255146	0.029254	0.319739	0.296057	0.307898	0.011841		0.85	0.467313	0.217197	0.342255	0.125058	0.441145	0.245108	0.343127	0.0980185
0.855	0.271903	0.224672	0.248287	0.0236155	0.312423	0.290903	0.301663	0.01076		0.855	0.454112	0.208051	0.331082	0.12303	0.432321	0.242327	0.337324	0.094997
0.86	0.262499	0.215677	0.239088	0.023411	0.306313	0.286922	0.296617	0.0096955		0.86	0.444012	0.200257	0.322134	0.121878	0.423367	0.240876	0.332122	0.0912455
0.865	0.254954	0.206775	0.230865	0.0240895	0.298266	0.283589	0.290928	0.0073385		0.865	0.432258	0.200641	0.316449	0.115808	0.418924	0.237741	0.328333	0.0905915
0.87	0.247077	0.210833	0.228955	0.018122	0.292307	0.279238	0.285772	0.0065345		0.87	0.422357	0.20143	0.311893	0.110463	0.413092	0.236531	0.324812	0.0882805
0.875	0.244011	0.219209	0.23161	0.012401	0.286871	0.274861	0.280866	0.006005		0.875	0.407815	0.202161	0.304988	0.102827	0.404834	0.233871	0.319353	0.0854815
0.88	0.240088	0.218092	0.22909	0.010998	0.281413	0.26936	0.275386	0.0060265		0.88	0.397165	0.198079	0.297622	0.099543	0.397606	0.232828	0.315217	0.082389
0.885	0.237165	0.207639	0.222402	0.014763	0.275764	0.263405	0.269585	0.0061795		0.885	0.383844	0.193519	0.288682	0.0951625	0.387391	0.231018	0.309204	0.0781865
0.89	0.237471	0.200749	0.21911	0.018361	0.269398	0.260991	0.265194	0.0042035		0.89	0.365023	0.187743	0.276383	0.08864	0.375947	0.227363	0.301655	0.074292
0.895	0.236301	0.190065	0.213183	0.023118	0.262989	0.256136	0.259562	0.0034265		0.895	0.352264	0.18267	0.267467	0.084797	0.365313	0.224516	0.294914	0.0703985
0.9	0.233698	0.182794	0.208246	0.025452	0.258863	0.250659	0.254761	0.004102		0.9	0.343928	0.176964	0.260446	0.083482	0.356131	0.221523	0.288827	0.067304
0.905	0.227875	0.177398	0.202636	0.0252385	0.253414	0.247106	0.25026	0.003154		0.905	0.329306	0.174439	0.251872	0.0774335	0.346402	0.219211	0.282806	0.0635955
0.91	0.223367	0.170631	0.196999	0.026368	0.247281	0.244324	0.245803	0.0014785		0.91	0.313184	0.171719	0.242452	0.0707325	0.334454	0.214534	0.274494	0.05996
0.915	0.216355	0.164304	0.190329	0.0260255	0.24131	0.239948	0.240629	0.000681		0.915	0.294389	0.168781	0.231585	0.062804	0.322983	0.209485	0.266234	0.056749
0.92	0.208145	0.159032	0.183588	0.0245565	0.23715	0.234177	0.235663	0.0014865		0.92	0.278825	0.165937	0.222381	0.056444	0.313278	0.204235	0.258757	0.0545215
0.925	0.19997	0.159586	0.179778	0.020192	0.23272	0.228882	0.230801	0.001919		0.925	0.268118	0.163135	0.215626	0.0524915	0.304939	0.199383	0.252161	0.052778
0.93	0.197827	0.164419	0.181123	0.016704	0.228078	0.222876	0.225477	0.002601		0.93	0.257148	0.161211	0.209179	0.0479685	0.296201	0.195313	0.245757	0.050444
0.935	0.199051	0.161196	0.180123	0.0189275	0.224634	0.21826	0.221447	0.003187		0.935	0.243714	0.155045	0.199379	0.0443345	0.284851	0.193502	0.239177	0.0456745
0.94	0.197258	0.160004	0.178631	0.018627	0.220237	0.21373	0.216983	0.0032535		0.94	0.237062	0.148441	0.192751	0.0443105	0.275353	0.189721	0.232537	0.042816
0.945	0.190298	0.154653	0.172476	0.0178225	0.214215	0.209276	0.211745	0.0024695		0.945	0.226342	0.142004	0.184173	0.042169	0.26623	0.184577	0.225404	0.0408265
0.95	0.182651	0.150148	0.1664	0.0162515	0.20833	0.204185	0.206257	0.0020725		0.95	0.211986	0.137469	0.174728	0.0372585	0.256441	0.181426	0.218934	0.0375075
0.955	0.173877	0.145516	0.159697	0.0141805	0.201924	0.197542	0.199733	0.002191		0.955	0.200986	0.133849	0.167417	0.0335685	0.250109	0.178316	0.214213	0.0358965
0.96	0.163631	0.140068	0.151849	0.0117815	0.197445	0.192116	0.194781	0.0026645		0.96	0.190173	0.13494	0.162556	0.0276165	0.242933	0.175714	0.209323	0.0336095
0.965	0.155815	0.130634	0.143225	0.0125905	0.193658	0.186673	0.190165	0.0034925		0.965	0.175399	0.132245	0.153822	0.021577	0.232268	0.171574	0.201921	0.030347
0.97	0.146589	0.12614	0.136364	0.0102245	0.187937	0.182702	0.185319	0.0026175		0.97	0.165664	0.125425	0.145545	0.0201195	0.223892	0.168096	0.195994	0.027898
0.975	0.139143	0.127054	0.133099	0.0060445	0.181336	0.178124	0.17973	0.001606		0.975	0.157042	0.117991	0.137516	0.0195255	0.215659	0.164312	0.189986	0.0256735
0.98	0.13488	0.126847	0.130863	0.0040165	0.175965	0.17207	0.174017	0.0019475		0.98	0.149248	0.113491	0.13137	0.0178785	0.20752	0.160746	0.184133	0.023387
0.985	0.130725	0.124277	0.127501	0.003224	0.171257	0.166106	0.168681	0.0025755		0.985	0.143467	0.112922	0.128194	0.0152725	0.201731	0.157664	0.179698	0.0220335
0.99	0.124787	0.120102	0.122444	0.0023425	0.166845	0.161105	0.163975	0.00287		0.99	0.13741	0.113082	0.125246	0.012164	0.193302	0.154082	0.173692	0.01961
0.995	0.120082	0.115706	0.117894	0.002188	0.161502	0.154936	0.158219	0.003283		0.995	0.13123	0.112981	0.122106	0.0091245	0.184169	0.150822	0.167496	0.0166735
1	0.1148	0.11554	0.11517	0.00037	0.156597	0.150946	0.153772	0.0028255		1	0.124868	0.108261	0.116565	0.0083035	0.176654	0.148167	0.162411	0.0142435

## Sheet: Figure 2E
	% of total intensity (in mDC)														% of total intensity (in mDC + SMIFH2)
	siglec						actin								siglec						actin
Distance from cell centre (% of radius)	Experiment 1	Experiment 2	Experiment 3	Experiment 4	average	SEM	Experiment 1	Experiment 2	Experiment 3	Experiment 4	average	SEM		Distance from cell centre (% of radius)	Experiment 1	Experiment 2	Experiment 3	Experiment 4	average	SEM	Experiment 1	Experiment 2	Experiment 3	Experiment 4	average	SEM
0.005	0.000287	0.001123	0.002526	0.002594	0.002526	0.002594	0.000588	0.000677	0.001446	0.000688	0.002526	0.002594		0.005	0.001301	0.001932	0.001118	0.00043	0.00119525	0.000308971	0.0012	0.001039	0.000499	0.000401	0.00078475	0.00019706
0.01	0.000764	0.001108	0.006504	0.006664	0.006504	0.006664	0.001601	0.001807	0.003647	0.001788	0.006504	0.006664		0.01	0.003011	0.004415	0.002885	0.001157	0.002867	0.000667175	0.003147	0.002196	0.001349	0.001058	0.0019375	0.000469891
0.015	0.001426	0.002275	0.011928	0.012698	0.011928	0.012698	0.002777	0.003343	0.006813	0.00309	0.011928	0.012698		0.015	0.004893	0.007204	0.004891	0.001897	0.00472125	0.00108776	0.005616	0.00326	0.002299	0.001692	0.00321675	0.000862429
0.02	0.002042	0.003387	0.015643	0.017817	0.015643	0.017817	0.003962	0.004833	0.009085	0.004753	0.015643	0.017817		0.02	0.006445	0.010231	0.006646	0.002551	0.00646825	0.00156884	0.007681	0.004179	0.003211	0.002371	0.0043605	0.00116684
0.025	0.002701	0.004599	0.01878	0.023255	0.01878	0.023255	0.005181	0.006176	0.01114	0.006182	0.01878	0.023255		0.025	0.007647	0.013174	0.008075	0.003227	0.00803075	0.00203466	0.009373	0.005334	0.004254	0.00306	0.00550525	0.00137033
0.03	0.003291	0.005404	0.02236	0.031378	0.02236	0.031378	0.006423	0.007515	0.014265	0.007468	0.02236	0.031378		0.03	0.00959	0.016221	0.010504	0.003675	0.0099975	0.00256789	0.010775	0.006642	0.005288	0.003783	0.006622	0.00150242
0.035	0.003908	0.006566	0.025071	0.039874	0.025071	0.039874	0.007807	0.00913	0.01681	0.008579	0.025071	0.039874		0.035	0.011528	0.020002	0.013949	0.004457	0.012484	0.00321472	0.011796	0.008208	0.006447	0.004501	0.007738	0.00155008
0.04	0.00456	0.008275	0.027775	0.044863	0.027775	0.044863	0.009125	0.010868	0.018816	0.010142	0.027775	0.044863		0.04	0.013412	0.024405	0.017881	0.0051	0.0151995	0.00405305	0.013445	0.010406	0.007359	0.005185	0.00909875	0.00180146
0.045	0.005473	0.010267	0.031158	0.049552	0.031158	0.049552	0.010472	0.012643	0.022214	0.011192	0.031158	0.049552		0.045	0.015568	0.029042	0.021348	0.00549	0.017862	0.00496214	0.015315	0.011376	0.008454	0.005757	0.0102255	0.00204801
0.05	0.006136	0.012041	0.03528	0.054903	0.03528	0.054903	0.011579	0.014526	0.025342	0.012273	0.03528	0.054903		0.05	0.017437	0.034199	0.023499	0.006	0.0202838	0.00588856	0.016633	0.012494	0.009288	0.006318	0.0111832	0.00221134
0.055	0.006775	0.012344	0.038422	0.060115	0.038422	0.060115	0.012901	0.016034	0.027157	0.013722	0.038422	0.060115		0.055	0.01952	0.038577	0.025937	0.006253	0.0225717	0.00672748	0.018458	0.013919	0.010286	0.00706	0.0124308	0.00244928
0.06	0.007393	0.013479	0.041486	0.065278	0.041486	0.065278	0.014208	0.017379	0.029435	0.015674	0.041486	0.065278		0.06	0.022589	0.044707	0.028536	0.006935	0.0256917	0.00780551	0.020614	0.014899	0.011582	0.007836	0.0137328	0.00270969
0.065	0.008065	0.015436	0.045379	0.067954	0.045379	0.067954	0.015578	0.018606	0.031748	0.017223	0.045379	0.067954		0.065	0.025827	0.051733	0.031563	0.007689	0.029203	0.00907111	0.02204	0.016814	0.012631	0.008484	0.0149923	0.00290003
0.07	0.008798	0.017346	0.049201	0.069772	0.049201	0.069772	0.016706	0.020027	0.033313	0.018822	0.049201	0.069772		0.07	0.029427	0.056424	0.037515	0.008264	0.0329075	0.00997359	0.023542	0.018751	0.013675	0.009254	0.0163055	0.00309557
0.075	0.009346	0.018681	0.051707	0.072141	0.051707	0.072141	0.018128	0.021455	0.035798	0.020407	0.051707	0.072141		0.075	0.031511	0.061431	0.045733	0.008452	0.0367817	0.0112475	0.025544	0.01964	0.014993	0.00984	0.0175042	0.00334472
0.08	0.010116	0.019968	0.054378	0.076199	0.054378	0.076199	0.019339	0.023433	0.039631	0.021948	0.054378	0.076199		0.08	0.032704	0.067008	0.057576	0.008651	0.0414847	0.0131197	0.02745	0.021288	0.01652	0.010625	0.0189708	0.00356984
0.085	0.010773	0.020851	0.057887	0.077865	0.057887	0.077865	0.020773	0.025517	0.041708	0.022665	0.057887	0.077865		0.085	0.034427	0.072801	0.065503	0.009381	0.045528	0.014642	0.029692	0.022966	0.018208	0.011556	0.0206055	0.00382729
0.09	0.011378	0.021818	0.060828	0.075943	0.060828	0.075943	0.022272	0.02713	0.043395	0.02295	0.060828	0.075943		0.09	0.035264	0.077419	0.068372	0.010026	0.0477703	0.0155041	0.03133	0.024102	0.019983	0.012381	0.021949	0.00395864
0.095	0.012086	0.024094	0.064417	0.077179	0.064417	0.077179	0.023979	0.029069	0.044998	0.023892	0.064417	0.077179		0.095	0.036987	0.079902	0.07178	0.010533	0.0498005	0.0160606	0.032213	0.025235	0.021553	0.013096	0.0230242	0.00397969
0.1	0.012957	0.025354	0.069323	0.076842	0.069323	0.076842	0.0257	0.031107	0.04796	0.024468	0.069323	0.076842		0.1	0.038586	0.081339	0.076917	0.011568	0.0521025	0.0165738	0.033629	0.02659	0.022908	0.013917	0.024261	0.00410297
0.105	0.014066	0.026406	0.072793	0.074958	0.072793	0.074958	0.027476	0.03349	0.05056	0.024813	0.072793	0.074958		0.105	0.039611	0.084344	0.082939	0.012578	0.054868	0.0175072	0.036793	0.027073	0.024505	0.014817	0.025797	0.00451636
0.11	0.014979	0.02733	0.076009	0.074177	0.076009	0.074177	0.029214	0.036339	0.053216	0.025495	0.076009	0.074177		0.11	0.041595	0.089703	0.093484	0.013294	0.059519	0.0194137	0.039117	0.027229	0.025378	0.015638	0.0268405	0.00481749
0.115	0.016062	0.028942	0.081064	0.073475	0.081064	0.073475	0.03089	0.038249	0.05567	0.026873	0.081064	0.073475		0.115	0.042918	0.0937	0.101333	0.014134	0.0630213	0.0208228	0.041358	0.028407	0.026183	0.016669	0.0281542	0.00508429
0.12	0.016548	0.031183	0.087009	0.072309	0.087009	0.072309	0.032392	0.039161	0.059036	0.028139	0.087009	0.072309		0.12	0.044498	0.098373	0.108323	0.014907	0.0665253	0.0221942	0.04376	0.029476	0.026951	0.017663	0.0294625	0.00540027
0.125	0.017306	0.033793	0.093136	0.075403	0.093136	0.075403	0.034087	0.040963	0.061247	0.028651	0.093136	0.075403		0.125	0.047063	0.103298	0.111825	0.015649	0.0694587	0.0229802	0.04637	0.030554	0.028366	0.018662	0.030988	0.00574166
0.13	0.018324	0.036696	0.097479	0.080654	0.097479	0.080654	0.035867	0.042767	0.062694	0.030089	0.097479	0.080654		0.13	0.049555	0.107873	0.115167	0.016519	0.0722785	0.0236852	0.04829	0.03209	0.030646	0.01944	0.0326165	0.00594025
0.135	0.019083	0.039771	0.100742	0.080008	0.100742	0.080008	0.037539	0.044473	0.063412	0.030923	0.100742	0.080008		0.135	0.052103	0.11146	0.118342	0.017818	0.0749308	0.0241556	0.048839	0.033445	0.032308	0.020445	0.0337592	0.00582289
0.14	0.020248	0.043163	0.101558	0.076878	0.101558	0.076878	0.039259	0.046577	0.063469	0.032054	0.101558	0.076878		0.14	0.054997	0.110167	0.12206	0.019082	0.0765765	0.0240977	0.04856	0.034514	0.033294	0.021668	0.034509	0.00550604
0.145	0.021915	0.044541	0.101603	0.077501	0.101603	0.077501	0.04093	0.04844	0.063222	0.032787	0.101603	0.077501		0.145	0.05776	0.109553	0.122915	0.0202	0.077607	0.0237396	0.050102	0.035985	0.034102	0.0229	0.0357722	0.00558175
0.15	0.02394	0.045245	0.101936	0.080666	0.101936	0.080666	0.042659	0.051028	0.063842	0.033777	0.101936	0.080666		0.15	0.059325	0.107835	0.119665	0.020868	0.0769232	0.0227931	0.051249	0.037533	0.035291	0.024171	0.037061	0.00555883
0.155	0.025319	0.045225	0.102805	0.08086	0.102805	0.08086	0.044607	0.05242	0.065502	0.034461	0.102805	0.08086		0.155	0.061464	0.103115	0.119824	0.021791	0.0765485	0.0219933	0.053674	0.03896	0.037374	0.025439	0.0388617	0.00578645
0.16	0.026621	0.046013	0.103024	0.082739	0.103024	0.082739	0.046768	0.054205	0.066921	0.03492	0.103024	0.082739		0.16	0.061602	0.100173	0.124335	0.023206	0.077329	0.0221887	0.056866	0.040966	0.038846	0.026531	0.0408022	0.00622874
0.165	0.027719	0.047722	0.104923	0.08848	0.104923	0.08848	0.048798	0.056023	0.068393	0.035466	0.104923	0.08848		0.165	0.06073	0.097699	0.12778	0.024344	0.0776382	0.0224403	0.058263	0.042805	0.039678	0.027958	0.042176	0.00624219
0.17	0.028664	0.048905	0.108558	0.090259	0.108558	0.090259	0.050989	0.057404	0.070138	0.03622	0.108558	0.090259		0.17	0.061105	0.094602	0.128017	0.024994	0.0771795	0.0221166	0.06017	0.042977	0.039972	0.029466	0.0431462	0.00637091
0.175	0.030365	0.051085	0.109445	0.089563	0.109445	0.089563	0.05266	0.059323	0.070884	0.037731	0.109445	0.089563		0.175	0.060898	0.092071	0.128067	0.025801	0.0767092	0.0218236	0.061506	0.044008	0.041129	0.03099	0.0444082	0.00634623
0.18	0.032038	0.051609	0.111669	0.088945	0.111669	0.088945	0.054528	0.061263	0.072761	0.03917	0.111669	0.088945		0.18	0.061277	0.090887	0.1266	0.026312	0.076269	0.0213451	0.063421	0.045174	0.041979	0.032326	0.045725	0.00650011
0.185	0.033695	0.05273	0.115666	0.09191	0.115666	0.09191	0.056375	0.062968	0.075323	0.040077	0.115666	0.09191		0.185	0.061994	0.093675	0.124657	0.02747	0.076949	0.0208719	0.065604	0.04614	0.04212	0.033721	0.0468963	0.00675124
0.19	0.035932	0.055105	0.118455	0.095663	0.118455	0.095663	0.058249	0.065226	0.075876	0.041329	0.118455	0.095663		0.19	0.062249	0.098475	0.125826	0.027674	0.078556	0.0213817	0.06712	0.048185	0.043129	0.035094	0.048382	0.00680267
0.195	0.037872	0.058588	0.121813	0.10282	0.121813	0.10282	0.060023	0.06744	0.076898	0.042924	0.121813	0.10282		0.195	0.062621	0.105343	0.125153	0.028836	0.0804882	0.0216023	0.069389	0.050772	0.043828	0.036922	0.0502278	0.0069848
0.2	0.039213	0.063001	0.126482	0.111196	0.126482	0.111196	0.062242	0.06977	0.078223	0.044548	0.126482	0.111196		0.2	0.064074	0.111958	0.124421	0.030059	0.082628	0.0218225	0.071903	0.051764	0.044539	0.038764	0.0517425	0.00722714
0.205	0.040686	0.066075	0.131743	0.112456	0.131743	0.112456	0.064634	0.071344	0.080996	0.045795	0.131743	0.112456		0.205	0.065706	0.114567	0.125603	0.030771	0.0841618	0.0220474	0.073043	0.05322	0.046141	0.040197	0.0531502	0.00714518
0.21	0.042764	0.069415	0.13603	0.111168	0.13603	0.111168	0.066852	0.072646	0.082267	0.047233	0.13603	0.111168		0.21	0.067638	0.116915	0.126404	0.031925	0.0857205	0.0220778	0.076024	0.054914	0.047319	0.041765	0.0550055	0.00750655
0.215	0.043939	0.073183	0.141947	0.110265	0.141947	0.110265	0.069425	0.075178	0.083642	0.049333	0.141947	0.110265		0.215	0.070966	0.118372	0.127178	0.033757	0.0875683	0.0217736	0.07817	0.056938	0.047803	0.043423	0.0565835	0.00772657
0.22	0.046403	0.077462	0.149904	0.111413	0.149904	0.111413	0.072408	0.077472	0.088086	0.051511	0.149904	0.111413		0.22	0.074716	0.124893	0.126654	0.035016	0.0903197	0.0220179	0.080993	0.05939	0.049055	0.045131	0.0586422	0.00803422
0.225	0.049648	0.078504	0.15746	0.116574	0.15746	0.116574	0.075358	0.080523	0.090535	0.052467	0.15746	0.116574		0.225	0.076303	0.130444	0.126312	0.037274	0.0925833	0.0221646	0.082833	0.061365	0.05033	0.046937	0.0603662	0.00809745
0.23	0.052787	0.081287	0.166141	0.128315	0.166141	0.128315	0.07853	0.083001	0.096119	0.053989	0.166141	0.128315		0.23	0.077922	0.136594	0.125806	0.039363	0.0949212	0.0224837	0.08356	0.063175	0.051936	0.048623	0.0618235	0.00788626
0.235	0.056355	0.085201	0.178941	0.136435	0.178941	0.136435	0.082088	0.085669	0.102079	0.055586	0.178941	0.136435		0.235	0.077396	0.143343	0.129842	0.040453	0.0977585	0.023815	0.084225	0.066515	0.054072	0.050254	0.0637665	0.00765221
0.24	0.059033	0.088235	0.191388	0.134332	0.191388	0.134332	0.085532	0.087197	0.108216	0.056758	0.191388	0.134332		0.24	0.0798	0.15039	0.136695	0.04234	0.102306	0.0251613	0.085587	0.069344	0.054249	0.051645	0.0652062	0.00783403
0.245	0.061289	0.090987	0.19839	0.132564	0.19839	0.132564	0.088688	0.088875	0.114076	0.056782	0.19839	0.132564		0.245	0.084392	0.153928	0.141671	0.044011	0.106	0.025624	0.088009	0.073217	0.054354	0.053363	0.0672357	0.00829506
0.25	0.064154	0.093846	0.208259	0.134693	0.208259	0.134693	0.092658	0.091857	0.116927	0.056697	0.208259	0.134693		0.25	0.089095	0.154852	0.145391	0.045203	0.108635	0.0256457	0.090098	0.074667	0.054766	0.055466	0.0687492	0.00847921
0.255	0.06788	0.097395	0.220264	0.139148	0.220264	0.139148	0.096593	0.096192	0.120951	0.058052	0.220264	0.139148		0.255	0.093151	0.157075	0.151049	0.04762	0.112224	0.0259108	0.091053	0.077116	0.056047	0.057675	0.0704728	0.00836443
0.26	0.071824	0.102826	0.230318	0.139444	0.230318	0.139444	0.100379	0.099297	0.12387	0.05926	0.230318	0.139444		0.26	0.09928	0.159541	0.149937	0.050755	0.114878	0.0251313	0.092977	0.080292	0.05737	0.05942	0.0725148	0.00856361
0.265	0.076634	0.107019	0.237004	0.135082	0.237004	0.135082	0.104272	0.101212	0.126805	0.060959	0.237004	0.135082		0.265	0.10342	0.16212	0.144621	0.054347	0.116127	0.0239887	0.095463	0.081027	0.058575	0.061556	0.0741553	0.00867336
0.27	0.081606	0.10893	0.246423	0.135926	0.246423	0.135926	0.108601	0.104065	0.128532	0.063873	0.246423	0.135926		0.27	0.105094	0.163911	0.143023	0.055198	0.116807	0.0238728	0.096981	0.085483	0.061663	0.063513	0.07691	0.00860374
0.275	0.0868	0.1126	0.255184	0.139069	0.255184	0.139069	0.1129	0.106711	0.133666	0.065433	0.255184	0.139069		0.275	0.108925	0.167796	0.14401	0.056375	0.119276	0.0242034	0.099356	0.089085	0.064302	0.066091	0.0797085	0.00864455
0.28	0.091863	0.116691	0.265631	0.138992	0.265631	0.138992	0.11751	0.109542	0.138832	0.066784	0.265631	0.138992		0.28	0.110988	0.172885	0.149003	0.058529	0.122851	0.0249422	0.102961	0.093645	0.066744	0.068566	0.082979	0.00905701
0.285	0.097	0.123802	0.276682	0.134295	0.276682	0.134295	0.123209	0.112739	0.14319	0.068356	0.276682	0.134295		0.285	0.111062	0.180381	0.149042	0.060745	0.125308	0.0257677	0.104786	0.097855	0.069327	0.071004	0.085743	0.00911071
0.29	0.102573	0.124958	0.29051	0.135723	0.29051	0.135723	0.128422	0.115711	0.147447	0.071142	0.29051	0.135723		0.29	0.112534	0.187655	0.148462	0.063174	0.127956	0.0264874	0.106615	0.103311	0.07179	0.073743	0.0888648	0.00932729
0.295	0.110251	0.122786	0.303698	0.141071	0.303698	0.141071	0.134515	0.118033	0.150521	0.073632	0.303698	0.141071		0.295	0.11485	0.193715	0.14801	0.064812	0.130347	0.0271761	0.10884	0.107691	0.074401	0.076291	0.0918057	0.00951376
0.3	0.118554	0.123255	0.315691	0.138215	0.315691	0.138215	0.140192	0.12078	0.154174	0.075437	0.315691	0.138215		0.3	0.11597	0.195946	0.147329	0.066547	0.131448	0.0271783	0.111993	0.109331	0.076158	0.079038	0.09413	0.00957827
0.305	0.127668	0.123622	0.323356	0.133167	0.323356	0.133167	0.146543	0.122394	0.159447	0.076696	0.323356	0.133167		0.305	0.115351	0.198554	0.152733	0.069069	0.133927	0.0275105	0.113733	0.113565	0.078224	0.082295	0.0969543	0.00967453
0.31	0.136286	0.124022	0.324042	0.130159	0.324042	0.130159	0.152891	0.125371	0.162987	0.078315	0.324042	0.130159		0.31	0.115232	0.202162	0.156565	0.072714	0.136668	0.0277413	0.115505	0.116844	0.080878	0.085968	0.0997988	0.00951539
0.315	0.143724	0.127404	0.321361	0.129725	0.321361	0.129725	0.160043	0.127738	0.168904	0.080193	0.321361	0.129725		0.315	0.118136	0.207758	0.157408	0.075643	0.139736	0.0281569	0.117287	0.121284	0.082043	0.089664	0.10257	0.00980955
0.32	0.148113	0.127211	0.321851	0.134538	0.321851	0.134538	0.164694	0.128837	0.173258	0.082498	0.321851	0.134538		0.32	0.120137	0.215483	0.151472	0.077949	0.14126	0.0289652	0.120364	0.126668	0.083279	0.092857	0.105792	0.0104972
0.325	0.15305	0.130169	0.324956	0.140944	0.324956	0.140944	0.169996	0.132154	0.177284	0.084718	0.324956	0.140944		0.325	0.120058	0.222235	0.150087	0.079625	0.143001	0.0300986	0.123541	0.130593	0.085087	0.095856	0.108769	0.0108861
0.33	0.159753	0.130531	0.332568	0.146404	0.332568	0.146404	0.175739	0.135184	0.183291	0.086047	0.332568	0.146404		0.33	0.122219	0.225002	0.150476	0.081518	0.144804	0.0302477	0.125971	0.133282	0.086939	0.099345	0.111384	0.0109346
0.335	0.168876	0.134953	0.339193	0.151112	0.339193	0.151112	0.181415	0.137126	0.18863	0.088286	0.339193	0.151112		0.335	0.12254	0.229661	0.150561	0.08336	0.14653	0.0309475	0.128209	0.137302	0.089832	0.103465	0.114702	0.0109468
0.34	0.175334	0.139729	0.348155	0.154127	0.348155	0.154127	0.186064	0.139633	0.196273	0.090906	0.348155	0.154127		0.34	0.122555	0.235957	0.150295	0.085728	0.148634	0.0319705	0.132106	0.141618	0.092596	0.107285	0.118401	0.011241
0.345	0.179346	0.14325	0.351657	0.155987	0.351657	0.155987	0.190342	0.142577	0.203292	0.094325	0.351657	0.155987		0.345	0.123507	0.2426	0.150162	0.088028	0.151074	0.0330562	0.134924	0.145477	0.095669	0.110967	0.121759	0.0113027
0.35	0.183326	0.14667	0.355094	0.159353	0.355094	0.159353	0.193405	0.14617	0.20901	0.09757	0.355094	0.159353		0.35	0.125578	0.249336	0.152886	0.092425	0.155056	0.0337701	0.138358	0.149415	0.098286	0.11522	0.12532	0.011487
0.355	0.188045	0.150389	0.364422	0.162571	0.364422	0.162571	0.19642	0.148629	0.217234	0.100124	0.364422	0.162571		0.355	0.129221	0.2508	0.158965	0.095057	0.158511	0.0334188	0.14083	0.152042	0.101847	0.11932	0.12851	0.0111837
0.36	0.193088	0.1499	0.37371	0.166963	0.37371	0.166963	0.199363	0.150974	0.224293	0.101671	0.37371	0.166963		0.36	0.133731	0.253305	0.164723	0.097956	0.162429	0.0332215	0.144437	0.156719	0.105665	0.123239	0.132515	0.0113098
0.365	0.20109	0.150144	0.383246	0.166134	0.383246	0.166134	0.201445	0.154361	0.228604	0.103528	0.383246	0.166134		0.365	0.135671	0.26104	0.17389	0.10136	0.16799	0.034372	0.146873	0.161205	0.108373	0.127217	0.135917	0.0115249
0.37	0.210061	0.151377	0.394381	0.16536	0.394381	0.16536	0.205371	0.156807	0.23458	0.105447	0.394381	0.16536		0.37	0.137118	0.268442	0.18252	0.104601	0.17317	0.03555	0.149247	0.165732	0.111639	0.131044	0.139415	0.0116577
0.375	0.219383	0.154179	0.406945	0.169604	0.406945	0.169604	0.20879	0.159312	0.241456	0.107916	0.406945	0.169604		0.375	0.138565	0.280988	0.183233	0.10911	0.177974	0.0375665	0.152175	0.168596	0.113877	0.135321	0.142492	0.0117098
0.38	0.226962	0.157398	0.416739	0.17534	0.416739	0.17534	0.212215	0.162141	0.247431	0.110018	0.416739	0.17534		0.38	0.14099	0.288089	0.186404	0.113293	0.182194	0.0383803	0.154628	0.175173	0.115831	0.140052	0.146421	0.0124845
0.385	0.230003	0.164713	0.425265	0.179676	0.425265	0.179676	0.21485	0.165797	0.25254	0.112856	0.425265	0.179676		0.385	0.144377	0.29439	0.184234	0.117486	0.185122	0.0389177	0.158118	0.180205	0.118906	0.145017	0.150562	0.0128084
0.39	0.231716	0.173628	0.432384	0.18502	0.432384	0.18502	0.217221	0.168766	0.260301	0.115974	0.432384	0.18502		0.39	0.148425	0.302132	0.180814	0.122133	0.188376	0.0397721	0.163553	0.186712	0.122455	0.149786	0.155627	0.0134276
0.395	0.234872	0.179418	0.436893	0.186065	0.436893	0.186065	0.219679	0.171917	0.270506	0.11884	0.436893	0.186065		0.395	0.149001	0.308935	0.183284	0.128241	0.192365	0.0404798	0.167354	0.191636	0.12573	0.15429	0.159753	0.0137286
0.4	0.236566	0.180096	0.438113	0.191147	0.438113	0.191147	0.221855	0.176416	0.275068	0.122099	0.438113	0.191147		0.4	0.152524	0.312525	0.191668	0.132742	0.197365	0.0402918	0.169807	0.197899	0.131227	0.158013	0.164236	0.0138219
0.405	0.241203	0.179268	0.440928	0.197148	0.440928	0.197148	0.22375	0.180561	0.282962	0.125163	0.440928	0.197148		0.405	0.156216	0.318024	0.19475	0.135652	0.20116	0.0408346	0.173567	0.205532	0.134343	0.160769	0.168553	0.014786
0.41	0.247829	0.180239	0.445121	0.201503	0.445121	0.201503	0.225937	0.185646	0.291666	0.128119	0.445121	0.201503		0.41	0.160939	0.32911	0.191473	0.136728	0.204562	0.0429999	0.177108	0.212263	0.138848	0.162452	0.172668	0.0153722
0.415	0.251284	0.183866	0.444401	0.208603	0.444401	0.208603	0.226113	0.190466	0.2991	0.130758	0.444401	0.208603		0.415	0.16444	0.332906	0.189907	0.138495	0.206437	0.043443	0.180399	0.220876	0.142195	0.164746	0.177054	0.0165786
0.42	0.255833	0.187921	0.448037	0.217483	0.448037	0.217483	0.225709	0.194616	0.304863	0.133136	0.448037	0.217483		0.42	0.171	0.335137	0.197208	0.142646	0.211498	0.0426922	0.183439	0.225171	0.146884	0.168138	0.180908	0.0165487
0.425	0.261173	0.193309	0.452044	0.218947	0.452044	0.218947	0.22652	0.197692	0.312303	0.135894	0.452044	0.218947		0.425	0.17757	0.336319	0.202092	0.146325	0.215577	0.0418338	0.187828	0.231392	0.151681	0.171598	0.185625	0.016952
0.43	0.265379	0.204277	0.456492	0.216733	0.456492	0.216733	0.226409	0.200885	0.323701	0.139117	0.456492	0.216733		0.43	0.184102	0.339307	0.20057	0.150313	0.218573	0.0415817	0.195093	0.236292	0.155707	0.17506	0.190538	0.0172408
0.435	0.269967	0.20995	0.462784	0.220836	0.462784	0.220836	0.225772	0.204706	0.331997	0.141988	0.462784	0.220836		0.435	0.191184	0.345531	0.200732	0.155546	0.223248	0.0419044	0.200405	0.240761	0.16143	0.178901	0.195374	0.0170998
0.44	0.274275	0.217171	0.466201	0.228674	0.466201	0.228674	0.225896	0.208361	0.339162	0.145674	0.466201	0.228674		0.44	0.197521	0.356499	0.205649	0.158352	0.229505	0.0435721	0.205072	0.247066	0.165746	0.183081	0.200241	0.0175601
0.445	0.277067	0.224079	0.466464	0.230804	0.466464	0.230804	0.225971	0.213085	0.348532	0.150188	0.466464	0.230804		0.445	0.204194	0.36574	0.213255	0.162948	0.236534	0.044438	0.211607	0.255232	0.170003	0.186189	0.205758	0.0185815
0.45	0.280373	0.233924	0.46756	0.228222	0.46756	0.228222	0.226921	0.217714	0.355888	0.153763	0.46756	0.228222		0.45	0.215519	0.374046	0.216859	0.166109	0.243133	0.0452067	0.216882	0.257953	0.174369	0.188146	0.209338	0.0184668
0.455	0.285318	0.244442	0.466509	0.229146	0.466509	0.229146	0.229852	0.222488	0.360462	0.157801	0.466509	0.229146		0.455	0.228362	0.378238	0.218991	0.16571	0.247825	0.0456076	0.222031	0.262763	0.180904	0.18915	0.213712	0.0186075
0.46	0.294016	0.254508	0.467233	0.237902	0.467233	0.237902	0.232908	0.226673	0.366424	0.161706	0.467233	0.237902		0.46	0.241968	0.381298	0.221427	0.163772	0.252116	0.0461316	0.228312	0.268705	0.186664	0.190356	0.218509	0.0191973
0.465	0.303621	0.26598	0.466097	0.241845	0.466097	0.241845	0.236485	0.231351	0.372849	0.165841	0.466097	0.241845		0.465	0.252676	0.386075	0.229845	0.163446	0.258011	0.0466947	0.235261	0.274151	0.190678	0.191796	0.222971	0.019969
0.47	0.312466	0.276388	0.468116	0.241671	0.468116	0.241671	0.239152	0.238526	0.379377	0.169994	0.468116	0.241671		0.47	0.257966	0.391118	0.2349	0.165346	0.262332	0.0472261	0.242583	0.278794	0.193802	0.193328	0.227127	0.020739
0.475	0.319117	0.285711	0.469353	0.242697	0.469353	0.242697	0.242626	0.245266	0.387633	0.173442	0.469353	0.242697		0.475	0.256234	0.390235	0.235176	0.168674	0.26258	0.0464627	0.24511	0.281916	0.198962	0.195077	0.230266	0.0206282
0.48	0.327505	0.289849	0.477307	0.24702	0.477307	0.24702	0.247049	0.250881	0.397446	0.177647	0.477307	0.24702		0.48	0.24945	0.392179	0.228742	0.173825	0.261049	0.0465308	0.249718	0.287794	0.204683	0.195793	0.234497	0.021329
0.485	0.336899	0.300279	0.48577	0.25733	0.48577	0.25733	0.252682	0.256986	0.406498	0.182639	0.48577	0.25733		0.485	0.249361	0.397489	0.228068	0.177498	0.263104	0.0472618	0.255231	0.294086	0.210486	0.197407	0.239303	0.0220616
0.49	0.347105	0.310288	0.492523	0.259627	0.492523	0.259627	0.258786	0.264441	0.413043	0.186309	0.492523	0.259627		0.49	0.254789	0.403353	0.236519	0.180584	0.268811	0.0475438	0.258888	0.298662	0.216776	0.198837	0.243291	0.0223391
0.495	0.358804	0.32114	0.503708	0.249517	0.503708	0.249517	0.263608	0.271218	0.419409	0.191083	0.503708	0.249517		0.495	0.26139	0.404976	0.241917	0.185927	0.273552	0.0466361	0.265181	0.302902	0.222578	0.200423	0.247771	0.0227652
0.5	0.370378	0.333879	0.507415	0.242798	0.507415	0.242798	0.26784	0.280326	0.422639	0.19633	0.507415	0.242798		0.5	0.265794	0.408002	0.238451	0.189723	0.275492	0.0468876	0.271909	0.311306	0.227777	0.201912	0.253226	0.0241577
0.505	0.378657	0.342328	0.514794	0.241634	0.514794	0.241634	0.271931	0.288125	0.423234	0.201876	0.514794	0.241634		0.505	0.273491	0.413563	0.239004	0.19037	0.279107	0.0479518	0.279186	0.320392	0.232389	0.20311	0.258769	0.0258329
0.51	0.382938	0.353466	0.515298	0.24464	0.515298	0.24464	0.274916	0.297706	0.422378	0.20797	0.515298	0.24464		0.51	0.283035	0.414933	0.244885	0.191198	0.283513	0.0476844	0.286019	0.3264	0.235427	0.20538	0.263306	0.0268163
0.515	0.385905	0.360703	0.510779	0.253299	0.510779	0.253299	0.278107	0.306199	0.427303	0.213466	0.510779	0.253299		0.515	0.29254	0.415175	0.242818	0.190126	0.285165	0.0481168	0.291807	0.330142	0.240057	0.207712	0.267429	0.0271455
0.52	0.391236	0.365695	0.503917	0.259903	0.503917	0.259903	0.281751	0.31357	0.429785	0.219199	0.503917	0.259903		0.52	0.301261	0.412008	0.241432	0.190598	0.286325	0.0476081	0.297081	0.333705	0.244303	0.209035	0.271031	0.0276353
0.525	0.399833	0.379609	0.497073	0.261866	0.497073	0.261866	0.286189	0.322614	0.429914	0.22406	0.497073	0.261866		0.525	0.30615	0.405982	0.243586	0.19119	0.286727	0.0461767	0.302534	0.338879	0.24788	0.211087	0.275095	0.028371
0.53	0.406286	0.395994	0.494929	0.262768	0.494929	0.262768	0.289017	0.331565	0.434159	0.230607	0.494929	0.262768		0.53	0.310032	0.404542	0.250077	0.191351	0.289	0.0454997	0.308359	0.34305	0.250606	0.211579	0.278398	0.0293182
0.535	0.414523	0.402025	0.49667	0.269747	0.49667	0.269747	0.290973	0.341929	0.434471	0.23599	0.49667	0.269747		0.535	0.316871	0.407485	0.256922	0.193193	0.293618	0.0455871	0.314481	0.34869	0.254166	0.211618	0.282239	0.0305923
0.54	0.421882	0.408687	0.50364	0.272808	0.50364	0.272808	0.293103	0.34977	0.438601	0.241861	0.50364	0.272808		0.54	0.325126	0.407812	0.251902	0.193935	0.294694	0.0462829	0.320018	0.350657	0.260739	0.212008	0.285855	0.0308904
0.545	0.430379	0.418724	0.505405	0.270471	0.505405	0.270471	0.294158	0.357924	0.441062	0.247415	0.505405	0.270471		0.545	0.338513	0.40689	0.250018	0.193061	0.297121	0.0472667	0.326574	0.351154	0.265909	0.212947	0.289146	0.0310807
0.55	0.436059	0.437175	0.504254	0.270995	0.504254	0.270995	0.294298	0.366461	0.445646	0.251291	0.504254	0.270995		0.55	0.351365	0.407765	0.250066	0.192468	0.300416	0.0485691	0.336069	0.353887	0.271879	0.213148	0.293746	0.0321227
0.555	0.439186	0.454561	0.501946	0.278301	0.501946	0.278301	0.29361	0.374713	0.449633	0.256333	0.501946	0.278301		0.555	0.36198	0.409743	0.252094	0.19554	0.304839	0.0491581	0.344277	0.358422	0.278242	0.21422	0.29879	0.0331654
0.56	0.4408	0.470922	0.50294	0.284996	0.50294	0.284996	0.294023	0.384225	0.452532	0.260874	0.50294	0.284996		0.56	0.36867	0.411408	0.25441	0.19734	0.307957	0.0495745	0.352059	0.3597	0.28046	0.215239	0.301864	0.0339443
0.565	0.442928	0.490901	0.506554	0.280651	0.506554	0.280651	0.296643	0.393975	0.454481	0.266776	0.506554	0.280651		0.565	0.370637	0.408744	0.255226	0.201017	0.308906	0.0485626	0.360846	0.363298	0.285323	0.215539	0.306251	0.0352392
0.57	0.447236	0.506356	0.508204	0.267224	0.508204	0.267224	0.298592	0.403289	0.45894	0.271466	0.508204	0.267224		0.57	0.371412	0.404063	0.260092	0.203906	0.309868	0.0468739	0.366715	0.366791	0.290609	0.215758	0.309968	0.0361702
0.575	0.448374	0.517745	0.50968	0.259102	0.50968	0.259102	0.298375	0.414971	0.458301	0.27568	0.50968	0.259102		0.575	0.377355	0.403905	0.264358	0.208782	0.3136	0.0462162	0.3717	0.371034	0.295889	0.215618	0.31356	0.0371802
0.58	0.446057	0.528762	0.508302	0.260909	0.508302	0.260909	0.295935	0.422909	0.462287	0.280258	0.508302	0.260909		0.58	0.38231	0.401276	0.272772	0.212172	0.317132	0.0450118	0.377615	0.371629	0.299551	0.215983	0.316195	0.0378206
0.585	0.441826	0.536603	0.50911	0.266569	0.50911	0.266569	0.294303	0.431226	0.466028	0.285837	0.50911	0.266569		0.585	0.39089	0.397333	0.280632	0.214658	0.320878	0.0443936	0.386348	0.372634	0.3053	0.215512	0.319948	0.0390579
0.59	0.434747	0.542398	0.512291	0.270723	0.512291	0.270723	0.29357	0.437235	0.467744	0.290989	0.512291	0.270723		0.59	0.39949	0.393923	0.28452	0.216165	0.323524	0.0445104	0.397418	0.373368	0.310641	0.215968	0.324349	0.0404931
0.595	0.42566	0.549464	0.514709	0.272697	0.514709	0.272697	0.293947	0.441804	0.472947	0.296573	0.514709	0.272697		0.595	0.4025	0.388993	0.291862	0.215514	0.324717	0.0439567	0.405043	0.377456	0.3168	0.216282	0.328895	0.0418177
0.6	0.419605	0.55359	0.510925	0.282948	0.510925	0.282948	0.294105	0.44739	0.480528	0.301325	0.510925	0.282948		0.6	0.411764	0.38316	0.294888	0.214217	0.326007	0.0448015	0.411378	0.377833	0.320791	0.215833	0.331459	0.0428377
0.605	0.414771	0.554119	0.508515	0.297575	0.508515	0.297575	0.29424	0.452302	0.485718	0.305677	0.508515	0.297575		0.605	0.423505	0.380202	0.294643	0.214157	0.328127	0.046475	0.417348	0.379815	0.322248	0.215602	0.333753	0.0439714
0.61	0.410647	0.558681	0.506126	0.308593	0.506126	0.308593	0.295156	0.458958	0.487231	0.309859	0.506126	0.308593		0.61	0.43193	0.37696	0.298585	0.211991	0.329867	0.0478782	0.422133	0.3795	0.326159	0.215371	0.335791	0.0446833
0.615	0.405876	0.563396	0.501334	0.312965	0.501334	0.312965	0.293772	0.46579	0.487755	0.315261	0.501334	0.312965		0.615	0.438634	0.378519	0.299194	0.21072	0.331767	0.0494298	0.427247	0.380692	0.331614	0.214447	0.3385	0.0457281
0.62	0.400815	0.56679	0.498567	0.312945	0.498567	0.312945	0.291465	0.470864	0.490862	0.319348	0.498567	0.312945		0.62	0.442727	0.371331	0.295939	0.210629	0.330156	0.0498541	0.432718	0.381499	0.335431	0.213852	0.340875	0.0467707
0.625	0.391091	0.566789	0.494569	0.315057	0.494569	0.315057	0.290284	0.474346	0.487844	0.322995	0.494569	0.315057		0.625	0.447273	0.362954	0.300759	0.212819	0.330951	0.0495158	0.438982	0.382277	0.338424	0.213448	0.343283	0.0479232
0.63	0.375946	0.569015	0.491173	0.308975	0.491173	0.308975	0.288839	0.477887	0.48947	0.324694	0.491173	0.308975		0.63	0.450973	0.356565	0.299471	0.216655	0.330916	0.0492578	0.441357	0.383634	0.340421	0.212964	0.344594	0.0485035
0.635	0.36007	0.573247	0.479769	0.297042	0.479769	0.297042	0.287904	0.480273	0.489508	0.327787	0.479769	0.297042		0.635	0.457117	0.351713	0.295271	0.216428	0.330132	0.0506086	0.444767	0.385663	0.341934	0.211558	0.34598	0.0495137
0.64	0.34945	0.574729	0.472952	0.299508	0.472952	0.299508	0.288165	0.483885	0.492604	0.33047	0.472952	0.299508		0.64	0.459488	0.348308	0.296318	0.212974	0.329272	0.0515831	0.450663	0.386678	0.344995	0.210439	0.348194	0.0507999
0.645	0.336183	0.573886	0.461053	0.303466	0.461053	0.303466	0.288387	0.488055	0.494966	0.332927	0.461053	0.303466		0.645	0.460409	0.352237	0.290897	0.211755	0.328824	0.0524455	0.453648	0.388121	0.346075	0.210289	0.349533	0.0514213
0.65	0.323951	0.566196	0.45454	0.301681	0.45454	0.301681	0.286785	0.494632	0.493183	0.33449	0.45454	0.301681		0.65	0.46056	0.348607	0.278634	0.213507	0.325327	0.0528472	0.455991	0.388117	0.348461	0.21013	0.350675	0.051842
0.655	0.313191	0.561697	0.446591	0.297504	0.446591	0.297504	0.284813	0.498042	0.489802	0.337992	0.446591	0.297504		0.655	0.459756	0.344007	0.278276	0.212112	0.323538	0.0527879	0.459244	0.389031	0.351626	0.208401	0.352076	0.052831
0.66	0.304517	0.56229	0.441583	0.297039	0.441583	0.297039	0.282089	0.500889	0.486447	0.341897	0.441583	0.297039		0.66	0.454846	0.339624	0.278248	0.210803	0.32088	0.0518272	0.464152	0.389635	0.351546	0.20414	0.352368	0.0546631
0.665	0.295989	0.565797	0.43858	0.295065	0.43858	0.295065	0.279097	0.502527	0.484538	0.345172	0.43858	0.295065		0.665	0.454664	0.334919	0.277712	0.208231	0.318882	0.0521477	0.462938	0.391588	0.352046	0.201617	0.352047	0.0551434
0.67	0.287656	0.568388	0.4278	0.288521	0.4278	0.288521	0.276292	0.504414	0.480912	0.347925	0.4278	0.288521		0.67	0.453196	0.329821	0.275284	0.206016	0.316079	0.0522558	0.461845	0.39287	0.354397	0.199554	0.352166	0.055514
0.675	0.276699	0.569656	0.417762	0.281718	0.417762	0.281718	0.272757	0.503316	0.478387	0.350508	0.417762	0.281718		0.675	0.457031	0.323987	0.271201	0.203716	0.313984	0.0536594	0.458549	0.392264	0.351855	0.197164	0.349958	0.0554763
0.68	0.265701	0.57112	0.406427	0.282016	0.406427	0.282016	0.269162	0.503097	0.475058	0.353879	0.406427	0.282016		0.68	0.459126	0.321766	0.269679	0.205861	0.314108	0.0538363	0.457729	0.394667	0.349234	0.19586	0.349372	0.0557964
0.685	0.254988	0.566787	0.392658	0.278182	0.392658	0.278182	0.265945	0.504008	0.472869	0.354414	0.392658	0.278182		0.685	0.461395	0.321554	0.277372	0.206429	0.316688	0.0537483	0.456325	0.394908	0.346135	0.193687	0.347764	0.056088
0.69	0.246739	0.560308	0.384209	0.270404	0.384209	0.270404	0.262453	0.502843	0.469002	0.354759	0.384209	0.270404		0.69	0.457522	0.322059	0.282511	0.201964	0.316014	0.0533783	0.453514	0.394664	0.34267	0.190539	0.345347	0.0563508
0.695	0.24041	0.553958	0.377563	0.267379	0.377563	0.267379	0.258195	0.500826	0.466393	0.356296	0.377563	0.267379		0.695	0.453891	0.322384	0.279538	0.197799	0.313403	0.0534857	0.450038	0.394062	0.33969	0.186665	0.342614	0.0566535
0.7	0.233511	0.551849	0.366933	0.271705	0.366933	0.271705	0.255658	0.49873	0.462458	0.358368	0.366933	0.271705		0.7	0.450819	0.314933	0.275331	0.193724	0.308702	0.0536731	0.447277	0.394179	0.336768	0.184028	0.340563	0.0568479
0.705	0.225779	0.552413	0.354346	0.278546	0.354346	0.278546	0.251657	0.494309	0.457244	0.359352	0.354346	0.278546		0.705	0.444601	0.307639	0.265044	0.190799	0.302021	0.0533059	0.445199	0.392688	0.333535	0.18084	0.338066	0.0571559
0.71	0.219217	0.546517	0.348595	0.282997	0.348595	0.282997	0.247697	0.489216	0.455504	0.360939	0.348595	0.282997		0.71	0.434897	0.302211	0.255304	0.190933	0.295836	0.0516608	0.44237	0.393971	0.329109	0.178335	0.335946	0.0574318
0.715	0.213945	0.533128	0.341434	0.277256	0.341434	0.277256	0.243411	0.486148	0.451225	0.363028	0.341434	0.277256		0.715	0.426761	0.298607	0.251706	0.188513	0.291397	0.0504446	0.441324	0.393438	0.324807	0.174974	0.333636	0.0580406
0.72	0.205628	0.520984	0.333745	0.280731	0.333745	0.280731	0.239812	0.481494	0.447467	0.365425	0.333745	0.280731		0.72	0.423822	0.295624	0.25492	0.187426	0.290448	0.049742	0.440705	0.393179	0.322226	0.173115	0.332306	0.0583804
0.725	0.193552	0.509983	0.325833	0.280901	0.325833	0.280901	0.236442	0.480214	0.442516	0.365655	0.325833	0.280901		0.725	0.419504	0.289415	0.260791	0.188843	0.289638	0.0481811	0.438408	0.39161	0.319292	0.172109	0.330355	0.0581606
0.73	0.185907	0.492409	0.313716	0.278884	0.313716	0.278884	0.234229	0.474418	0.437513	0.365333	0.313716	0.278884		0.73	0.411587	0.286004	0.266373	0.188936	0.288225	0.046151	0.430489	0.388037	0.31825	0.16997	0.326686	0.0571329
0.735	0.179212	0.479993	0.298602	0.277013	0.298602	0.277013	0.230349	0.471918	0.4301	0.3668	0.298602	0.277013		0.735	0.406308	0.282178	0.26666	0.187455	0.28565	0.0452523	0.426073	0.386862	0.316373	0.16788	0.324297	0.0568637
0.74	0.173734	0.468543	0.29066	0.275071	0.29066	0.275071	0.226576	0.467141	0.422578	0.367266	0.29066	0.275071		0.74	0.402344	0.273789	0.265633	0.182935	0.281175	0.0453037	0.418621	0.383189	0.313908	0.165663	0.320345	0.0559579
0.745	0.170133	0.454711	0.285813	0.264331	0.285813	0.264331	0.223536	0.461029	0.418029	0.366867	0.285813	0.264331		0.745	0.397013	0.265164	0.265834	0.181919	0.277483	0.0444479	0.411228	0.379871	0.311334	0.16264	0.316268	0.0552936
0.75	0.16636	0.443986	0.28265	0.262164	0.28265	0.262164	0.220545	0.455685	0.414544	0.367241	0.28265	0.262164		0.75	0.393619	0.255938	0.255065	0.17985	0.271118	0.0445575	0.406361	0.376199	0.309141	0.160123	0.312956	0.0548457
0.755	0.161641	0.434669	0.278868	0.266031	0.278868	0.266031	0.217895	0.450847	0.41118	0.366704	0.278868	0.266031		0.755	0.391018	0.25304	0.240312	0.18011	0.26612	0.0445668	0.405258	0.371749	0.308175	0.15749	0.310668	0.0548846
0.76	0.156806	0.43089	0.273253	0.274549	0.273253	0.274549	0.215518	0.444597	0.407189	0.366077	0.273253	0.274549		0.76	0.394851	0.250839	0.235216	0.178271	0.264794	0.0460712	0.402225	0.370365	0.304824	0.15469	0.308026	0.0549862
0.765	0.151643	0.425575	0.268913	0.280852	0.268913	0.280852	0.212214	0.439554	0.404702	0.365096	0.268913	0.280852		0.765	0.395412	0.248888	0.237035	0.17613	0.264366	0.0464984	0.397119	0.368801	0.300335	0.152742	0.304749	0.0545897
0.77	0.147152	0.416863	0.259009	0.283189	0.259009	0.283189	0.208063	0.433266	0.401163	0.364193	0.259009	0.283189		0.77	0.392244	0.248345	0.237469	0.17324	0.262825	0.0462127	0.393341	0.364619	0.297152	0.151064	0.301544	0.0540591
0.775	0.141892	0.402367	0.252873	0.28403	0.252873	0.28403	0.2046	0.425945	0.393476	0.363063	0.252873	0.28403		0.775	0.386819	0.245137	0.235596	0.172473	0.260006	0.0452406	0.386633	0.361748	0.294259	0.147785	0.297606	0.0536171
0.78	0.140424	0.388416	0.253077	0.278646	0.253077	0.278646	0.201153	0.421921	0.388452	0.361214	0.253077	0.278646		0.78	0.384063	0.239998	0.230715	0.1703	0.256269	0.0453135	0.382934	0.35775	0.288161	0.145287	0.293533	0.0533246
0.785	0.138378	0.376757	0.25421	0.270753	0.25421	0.270753	0.197969	0.416662	0.382768	0.357391	0.25421	0.270753		0.785	0.383036	0.236822	0.224369	0.165691	0.25248	0.0461994	0.37706	0.353166	0.282667	0.142386	0.28882	0.0527632
0.79	0.134204	0.36821	0.254046	0.270714	0.254046	0.270714	0.195054	0.410406	0.380184	0.353295	0.254046	0.270714		0.79	0.384359	0.231227	0.223321	0.163457	0.250591	0.0470858	0.372367	0.347255	0.278552	0.139724	0.284475	0.052165
0.795	0.12771	0.35165	0.251195	0.269222	0.251195	0.269222	0.192951	0.402558	0.376438	0.350188	0.251195	0.269222		0.795	0.379958	0.228656	0.217583	0.162553	0.247188	0.0465572	0.369712	0.348784	0.275363	0.137306	0.282791	0.0525447
0.8	0.122749	0.341499	0.244982	0.281567	0.244982	0.281567	0.190849	0.396691	0.371192	0.346963	0.244982	0.281567		0.8	0.374945	0.222812	0.211929	0.156709	0.241599	0.0467446	0.366954	0.345297	0.272351	0.134423	0.279756	0.0525005
0.805	0.118795	0.33783	0.237691	0.288719	0.237691	0.288719	0.18843	0.391037	0.361707	0.344813	0.237691	0.288719		0.805	0.368734	0.217083	0.20902	0.15161	0.236612	0.0463899	0.364906	0.342507	0.26662	0.131224	0.276314	0.0527377
0.81	0.115534	0.334625	0.234985	0.283446	0.234985	0.283446	0.184572	0.383491	0.354372	0.341177	0.234985	0.283446		0.81	0.363261	0.210982	0.202563	0.150769	0.231894	0.0457677	0.361103	0.337489	0.261221	0.129118	0.272233	0.0522489
0.815	0.111808	0.331877	0.233334	0.263579	0.233334	0.263579	0.180562	0.375886	0.347154	0.336106	0.233334	0.263579		0.815	0.35475	0.20549	0.197333	0.151974	0.227387	0.044056	0.356837	0.330342	0.25712	0.127032	0.267833	0.0514529
0.82	0.107765	0.331456	0.22972	0.249134	0.22972	0.249134	0.176823	0.369605	0.339145	0.330731	0.22972	0.249134		0.82	0.346698	0.20073	0.193763	0.149868	0.222765	0.0428175	0.350412	0.322927	0.25169	0.124665	0.262424	0.050411
0.825	0.103101	0.325747	0.223383	0.247103	0.223383	0.247103	0.172662	0.362357	0.334139	0.323936	0.223383	0.247103		0.825	0.338899	0.196921	0.187279	0.146253	0.217338	0.0419827	0.343693	0.318205	0.247358	0.120369	0.257406	0.0500184
0.83	0.099815	0.317171	0.217917	0.248994	0.217917	0.248994	0.168853	0.353491	0.327797	0.317442	0.217917	0.248994		0.83	0.335643	0.19323	0.191162	0.144266	0.216075	0.0414282	0.336928	0.314595	0.242594	0.117313	0.252858	0.0494613
0.835	0.097341	0.309521	0.214906	0.243129	0.214906	0.243129	0.165523	0.342593	0.322808	0.312124	0.214906	0.243129		0.835	0.332935	0.187038	0.193541	0.139877	0.213348	0.0416169	0.330451	0.308619	0.237262	0.114661	0.247748	0.0486203
0.84	0.096014	0.301426	0.208745	0.231726	0.208745	0.231726	0.161719	0.334297	0.316853	0.305534	0.208745	0.231726		0.84	0.32488	0.182378	0.193561	0.135316	0.209034	0.0406249	0.323815	0.303438	0.233954	0.111753	0.24324	0.0478637
0.845	0.093838	0.296825	0.204174	0.227063	0.204174	0.227063	0.158681	0.32724	0.311969	0.301861	0.204174	0.227063		0.845	0.322501	0.181266	0.196026	0.132072	0.207966	0.040552	0.318392	0.298651	0.232304	0.108977	0.239581	0.0472677
0.85	0.09069	0.2844	0.198382	0.225892	0.198382	0.225892	0.155874	0.319739	0.309383	0.296057	0.198382	0.225892		0.85	0.319429	0.176527	0.192009	0.129017	0.204246	0.0406659	0.311496	0.29372	0.231318	0.105886	0.235605	0.0465315
0.855	0.086809	0.271903	0.191825	0.224672	0.191825	0.224672	0.151878	0.312423	0.304151	0.290903	0.191825	0.224672		0.855	0.312851	0.172164	0.179611	0.12786	0.198121	0.0399124	0.301097	0.286658	0.232339	0.103157	0.230813	0.0450526
0.86	0.085896	0.262499	0.184688	0.215677	0.184688	0.215677	0.148445	0.306313	0.294694	0.286922	0.184688	0.215677		0.86	0.300728	0.168759	0.175729	0.125474	0.192672	0.0376946	0.294527	0.281952	0.22978	0.100229	0.226622	0.0444013
0.865	0.084261	0.254954	0.181154	0.206775	0.181154	0.206775	0.144085	0.298266	0.288647	0.283589	0.181154	0.206775		0.865	0.291966	0.166013	0.174545	0.120626	0.188288	0.0365289	0.28939	0.274977	0.225962	0.096946	0.221819	0.0437817
0.87	0.08154	0.247077	0.174993	0.210833	0.174993	0.210833	0.140317	0.292307	0.284405	0.279238	0.174993	0.210833		0.87	0.289369	0.162563	0.170771	0.117496	0.18505	0.0366919	0.284767	0.269763	0.222361	0.093384	0.217569	0.0434786
0.875	0.079002	0.244011	0.171834	0.219209	0.171834	0.219209	0.136787	0.286871	0.275997	0.274861	0.171834	0.219209		0.875	0.286311	0.158779	0.169505	0.115502	0.182524	0.0365114	0.280542	0.261874	0.218545	0.090643	0.212901	0.0427712
0.88	0.076276	0.240088	0.171607	0.218092	0.171607	0.218092	0.133458	0.281413	0.272654	0.26936	0.171607	0.218092		0.88	0.284832	0.150557	0.165138	0.113106	0.178408	0.0371284	0.275871	0.255217	0.216667	0.088462	0.209054	0.0420277
0.885	0.074824	0.237165	0.16959	0.207639	0.16959	0.207639	0.131081	0.275764	0.266628	0.263405	0.16959	0.207639		0.885	0.283821	0.14597	0.15999	0.105851	0.173908	0.0383915	0.272661	0.24766	0.213815	0.084989	0.204781	0.0417113
0.89	0.073954	0.237471	0.165857	0.200749	0.165857	0.200749	0.129014	0.269398	0.25927	0.260991	0.165857	0.200749		0.89	0.276674	0.140881	0.156365	0.099817	0.168434	0.0380011	0.268694	0.240842	0.211903	0.082894	0.201083	0.0410668
0.895	0.073263	0.236301	0.162684	0.190065	0.162684	0.190065	0.126896	0.262989	0.251515	0.256136	0.162684	0.190065		0.895	0.264979	0.137565	0.157383	0.098087	0.164504	0.0356871	0.260239	0.237043	0.20727	0.081003	0.196389	0.0399603
0.9	0.070006	0.233698	0.159775	0.182794	0.159775	0.182794	0.125053	0.258863	0.247695	0.250659	0.159775	0.182794		0.9	0.251918	0.134428	0.152787	0.095371	0.158626	0.033322	0.253093	0.230992	0.203	0.079102	0.191547	0.0388575
0.905	0.068209	0.227875	0.155117	0.177398	0.155117	0.177398	0.122905	0.253414	0.243101	0.247106	0.155117	0.177398		0.905	0.24643	0.127136	0.147355	0.092235	0.153289	0.0330681	0.245598	0.224907	0.198491	0.078148	0.186786	0.0374736
0.91	0.066796	0.223367	0.148211	0.170631	0.148211	0.170631	0.120089	0.247281	0.237492	0.244324	0.148211	0.170631		0.91	0.242615	0.119294	0.145537	0.090179	0.149406	0.0330624	0.239419	0.220061	0.195836	0.077263	0.183145	0.0364024
0.915	0.064445	0.216355	0.146014	0.164304	0.146014	0.164304	0.117191	0.24131	0.232495	0.239948	0.146014	0.164304		0.915	0.237899	0.113546	0.142691	0.088212	0.145587	0.0327216	0.233279	0.21276	0.191475	0.075608	0.17828	0.035272
0.92	0.061239	0.208145	0.141849	0.159032	0.141849	0.159032	0.114148	0.23715	0.228896	0.234177	0.141849	0.159032		0.92	0.230314	0.108642	0.144042	0.087847	0.142711	0.0314203	0.228511	0.206889	0.187038	0.073739	0.174044	0.0344908
0.925	0.059119	0.19997	0.138308	0.159586	0.138308	0.159586	0.111202	0.23272	0.226493	0.228882	0.138308	0.159586		0.925	0.226566	0.106604	0.136663	0.087198	0.139258	0.0308301	0.22252	0.202617	0.182367	0.07236	0.169966	0.0335519
0.93	0.057719	0.197827	0.133333	0.164419	0.133333	0.164419	0.109125	0.228078	0.224832	0.222876	0.133333	0.164419		0.93	0.220661	0.10559	0.128312	0.085762	0.135081	0.0298215	0.218059	0.200669	0.179462	0.070565	0.167189	0.0331606
0.935	0.056619	0.199051	0.130152	0.161196	0.130152	0.161196	0.107198	0.224634	0.218327	0.21826	0.130152	0.161196		0.935	0.212758	0.105405	0.129282	0.082308	0.132438	0.0284386	0.212193	0.196244	0.177635	0.067232	0.163326	0.0328004
0.94	0.05455	0.197258	0.130304	0.160004	0.130304	0.160004	0.105188	0.220237	0.215393	0.21373	0.130304	0.160004		0.94	0.211306	0.1074	0.133869	0.0772	0.132444	0.0287233	0.206482	0.192095	0.175384	0.065472	0.159858	0.0320972
0.945	0.051163	0.190298	0.129684	0.154653	0.129684	0.154653	0.099253	0.214215	0.209391	0.209276	0.129684	0.154653		0.945	0.206361	0.107123	0.134433	0.074609	0.130632	0.0280484	0.200548	0.185304	0.172976	0.063585	0.155603	0.0311867
0.95	0.049543	0.182651	0.13217	0.150148	0.13217	0.150148	0.09496	0.20833	0.204291	0.204185	0.13217	0.150148		0.95	0.199762	0.104896	0.133539	0.073277	0.127868	0.0269394	0.193618	0.183357	0.171119	0.061889	0.152496	0.0305503
0.955	0.049284	0.173877	0.130644	0.145516	0.130644	0.145516	0.092006	0.201924	0.203136	0.197542	0.130644	0.145516		0.955	0.194574	0.102349	0.131378	0.072153	0.125113	0.02612	0.186386	0.176826	0.167477	0.060065	0.147689	0.0294618
0.96	0.050354	0.163631	0.129485	0.140068	0.129485	0.140068	0.089773	0.197445	0.197159	0.192116	0.129485	0.140068		0.96	0.186427	0.101991	0.133556	0.071109	0.123271	0.0246106	0.181369	0.172085	0.165395	0.058668	0.144379	0.0287575
0.965	0.051375	0.155815	0.127198	0.130634	0.127198	0.130634	0.087875	0.193658	0.192272	0.186673	0.127198	0.130634		0.965	0.179369	0.100089	0.129648	0.068075	0.119295	0.0236439	0.175622	0.167894	0.163238	0.056857	0.140903	0.0281314
0.97	0.050288	0.146589	0.124304	0.12614	0.124304	0.12614	0.08621	0.187937	0.185566	0.182702	0.124304	0.12614		0.97	0.169676	0.095642	0.124529	0.066181	0.114007	0.0220498	0.167805	0.161806	0.161271	0.055117	0.1365	0.027168
0.975	0.045613	0.139143	0.119648	0.127054	0.119648	0.127054	0.080107	0.181336	0.180946	0.178124	0.119648	0.127054		0.975	0.165474	0.092978	0.120845	0.066459	0.111439	0.0211587	0.161499	0.156194	0.15979	0.053496	0.132745	0.0264394
0.98	0.039278	0.13488	0.113162	0.126847	0.113162	0.126847	0.071266	0.175965	0.174862	0.17207	0.113162	0.126847		0.98	0.159828	0.091967	0.12223	0.063961	0.109496	0.0205673	0.156426	0.151875	0.156737	0.052375	0.129353	0.0256835
0.985	0.038565	0.130725	0.106204	0.124277	0.106204	0.124277	0.070309	0.171257	0.174026	0.166106	0.106204	0.124277		0.985	0.15469	0.092732	0.121461	0.061332	0.107554	0.0199403	0.15126	0.147863	0.154647	0.051714	0.126371	0.0249242
0.99	0.037812	0.124787	0.097845	0.120102	0.097845	0.120102	0.068725	0.166845	0.171469	0.161105	0.097845	0.120102		0.99	0.150817	0.088725	0.121358	0.060786	0.105422	0.0195487	0.146277	0.144084	0.151583	0.050432	0.123094	0.0242718
0.995	0.037342	0.120082	0.090015	0.115706	0.090015	0.115706	0.0677	0.161502	0.166445	0.154936	0.090015	0.115706		0.995	0.143524	0.082934	0.123427	0.060464	0.102587	0.0188652	0.141875	0.137243	0.148518	0.048672	0.119077	0.0235821
1	0.036399	0.1148	0.086239	0.11554	0.086239	0.11554	0.066639	0.156597	0.164155	0.150946	0.086239	0.11554		1	0.133316	0.077163	0.11947	0.060323	0.097568	0.0172268	0.137393	0.134542	0.14483	0.047025	0.115947	0.0230763

## Sheet: Figure 2F
	Experiment 1	Average area between siglec-1 spots			Experiment 2	Average area between siglec-1 spots
	cell nº	Control	CK666		cell nº	Control	CK666
	1	0,9155*	0.2997		1	0.223425	0.129193
	2	0.4419	0.4156		2	0.214989	0.155773
	3	0.2995	0.4487		3	0.094717	0.082433
	4	0.2486	0.6205		4	0.162114	0.177253
	5	0.3674	0.4612		5	0.132008	0.101532
	6	0.2983	0.2183		6	0.073891	0.073491
	7	0.4684	0.462		7	0.105139	0.134352
	8	0.4183	0.3853		8	0.110798	0.103073
	9	0.5145	0.2734		9	0.0831	0.099798
	10	0.4928	0.2595		10	0.087634	0.115826
	11	0.4928	0.293		average	0.128782	0.117272
	12	0.4267	0.4588		SD	0.0541051	0.0323199
	13	0.4669	0.6789
	14	0.5042	0.6064
	15	0.6486	0.6412
	16	0.3536	0.5441
	17		0.4772
	average	0.4295	0.443753
	SD	0.102983	0.142639
	Table Analyzed (Mann-Whitney test)				Table Analyzed (Mann-Whitney test)
	Column B	Mdc + ck666			Column B	Mdc + ck666
	vs.	vs,			vs.	vs,
	Column A	Mdc			Column A	Mdc
	Mann Whitney test				Mann Whitney test
	P value	0.4559			P value	0.8534
	Exact or approximate P value?	Exact			Exact or approximate P value?	Exact
	P value summary	ns			P value summary	ns
	Significantly different (P < 0.05)?	No			Significantly different (P < 0.05)?	No
	One- or two-tailed P value?	Two-tailed			One- or two-tailed P value?	Two-tailed
	Sum of ranks in column A,B	325 , 416			Sum of ranks in column A,B	108 , 102
	Mann-Whitney U	154			Mann-Whitney U	47
	Difference between medians				Difference between medians
	Median of column A	0,4225, n=18			Median of column A	0,1080, n=10
	Median of column B	0,4538, n=20			Median of column B	0,1094, n=10
	Difference: Actual	0.03125			Difference: Actual	0.001481
	Difference: Hodges-Lehmann	0.0376			Difference: Hodges-Lehmann	-0.00244

## Sheet: Figure 2G
Experiment 1	Average area between siglec-1 spots			Experiment 2	Average area between siglec-1 spots			Experiment 3	Average area between siglec-1 spots
cell nº	Control	SMIFH2		cell nº	Control	SMIFH2		cell nº	Control	SMIFH2
1	0.4183	0.5176		1	0.1995	0.276		1	0.223425	0.210223
2	0.5145	0.7756		2	0.1527	0.1895		2	0.214989	0.113975
3	0.4928	0.4687		3	0.1723	0.2857		3	0.094717	0.155075
4	0.4928	0.4873		4	0.1918	0.3017		4	0.162114	0.108419
5	0.4267	0.55		5	0.1074	0.1471		5	0.132008	0.255546
6	0.4669	0.6748		6	0.2883	0.2048		6	0.073891	0.159875
7	0.5042	0.4723		7	0.1712	0.1771		7	0.105139	0.140138
8	0.6486	0.6823		8	0.1673	0.1723		8	0.110798	0.126229
9	0.3536	0.5912		9	0.09687	0.3799		9	0.0831	0.090733
10	0.3253	0.4376		10	0.1438	0.193		10	0.087634	0.108849
11	0.2772	0.351		11	0.1395	0.2923		average	0.128782	0.146906
12	0.1874	0.5459		12	0.2766	0.3252		SD	0.0541051	0.0513045
13	0.9155	0.5238		13	0.2372	0.328
14	0.4419	0.6257		14	0.2142	0.2799
15	0.2995	0.6257		15	0.5558	0.1643
16	0.2486	0.5027		16	0.2476	0.2753
17	0.3674	0.4153		17	0.2158	0.4637
18	0.2983	0.6446		18		0.2519
19	0.4684			19		0.2998
average	0.428837	0.549561		average	0.210463	0.261539
SD	0.162845	0.107656		SD	0.104133	0.0814651
Table Analyzed (Mann-Whitney test)				Table Analyzed (Mann-Whitney test)				Table Analyzed (Mann-Whitney test)
Column B	Mdc + smifh2			Column B	Mdc + smifh2			Column B	Mdc + smifh2
vs.	vs,			vs.	vs,			vs.	vs,
Column A	Mdc			Column A	Mdc			Column A	Mdc
Mann Whitney test				Mann Whitney test				Mann Whitney test
P value	0.0025			P value	0.0181			P value	0.315
Exact or approximate P value?	Exact			Exact or approximate P value?	Exact			Exact or approximate P value?	Exact
P value summary	**			P value summary	*			P value summary	ns
Significantly different (P < 0.05)?	Yes			Significantly different (P < 0.05)?	Yes			Significantly different (P < 0.05)?	No
One- or two-tailed P value?	Two-tailed			One- or two-tailed P value?	Two-tailed			One- or two-tailed P value?	Two-tailed
Sum of ranks in column A,B	264 , 439			Sum of ranks in column A,B	240,5 , 425,5			Sum of ranks in column A,B	91 , 119
Mann-Whitney U	74			Mann-Whitney U	87.5			Mann-Whitney U	36
Difference between medians				Difference between medians				Difference between medians
Median of column A	0,4267, n=19			Median of column A	0,1918, n=17			Median of column A	0,1080, n=10
Median of column B	0,5349, n=18			Median of column B	0,2760, n=19			Median of column B	0,1332, n=10
Difference: Actual	0.1082			Difference: Actual	0.0842			Difference: Actual	0.02521
Difference: Hodges-Lehmann	0.1345			Difference: Hodges-Lehmann	0.0626			Difference: Hodges-Lehmann	0.02115
Experiment 1	Average area between siglec-1 spots
cell nº	Control	SMIFH2
Experiment 1	0.428837	0.549561
Experiment 2	0.210463	0.263553
Experiment 3	0.128782	0.146906
average	0.256027	0.320007
SEM	0.0895644	0.119615
Table Analyzed (ratio Paired T-test)
Column B	Mdc + smifh2
vs.	vs,
Column A	Mdc
Ratio paired t test
P value	0.0298
P value summary	*
Significantly different (P < 0.05)?	Yes
One- or two-tailed P value?	Two-tailed
t, df	t=5,666, df=2
Number of pairs	3
How big is the difference?
Geometric mean of ratios (B / A)	1.223
SD of log(ratios)	0.02676
SEM of log(ratios)	0.01545
95% confidence interval	1,050 to 1,426
R squared (partial eta squared)	0.9414
How effective was the pairing?
Correlation coefficient (r)	0.9992
P value (one tailed)	0.0127
P value summary	*
Was the pairing significantly effective?	Yes

## Sheet: Figure 2H
	mDC						mDC + CK666
Nº of molecules per spot	Experiment 1	Experiment 2	AVERAGE	SEM		Nº of molecules per spot	Experiment 1	Experiment 2	AVERAGE	SEM
1	0.4242	0.1702	0.2972	0.127		1	0.3915	0.064	0.22775	0.231577
2	0.3235	0.5521	0.4378	0.1143		2	0.292	0.6869	0.48945	0.279236
3	0.1239	0.1084	0.11615	0.00775		3	0.1198	0.1103	0.11505	0.00671751
4	0.128666	0.1692	0.148933	0.020267		4	0.196758	0.1373	0.167029	0.0420429
Sample size	all siglec-1 spots from 9 cells	all siglec-1 spots from 10 cells				Sample size	all siglec-1 spots from 10 cells	all siglec-1 spots from 10 cells
Table Analyzed (TWO-WAY ANOVA
Two-way RM ANOVA	Matching: Both factors
Assume sphericity?	Yes
Alpha	0.05
Source of Variation	% of total variation	P value	P value summary	Significant?
Molecules per spot	59.06	0.3563	ns	No
Cell type	3.3e-05	0.406	ns	No
Molecules per spot x Cell type	1.596	0.6007	ns	No
experiment x Molecules per spot	37.15
experiment x Cell type	1.812e-05
experiment	4.721e-05
ANOVA table	SS	DF	MS	F (DFn, DFd)	P value
Molecules per spot	0.2893	3	0.09643	F (3, 3) = 1,590	P=0,3563
Cell type	1.617e-07	1	1.617e-07	F (1, 1) = 1,822	P=0,4060
Molecules per spot x Cell type	0.00782	3	0.002607	F (3, 3) = 0,7258	P=0,6007
experiment x Molecules per spot	0.182	3	0.06066
experiment x Cell type	8.875e-08	1	8.875e-08
experiment	2.313e-07	1	2.313e-07
Residual	0.01077	3	0.003591
Difference between column means
Mean of mDC control	0.25
Mean of mDC CK666	0.2498
Difference between means	0.000201
SE of difference	0.000149
95% CI of difference	-0,001692 to 0,002094
Data summary
Number of columns (Cell type)	2
Number of rows (Molecules per spot)	4
Number of subjects (experiment)	2
Number of missing values	0
Table Analyzed (Bonferroni post-test)
Compare each cell mean with the other cell mean in that row
Number of families	1
Number of comparisons per family	4
Alpha	0.05
Bonferroni's multiple comparisons test	Mean Diff,	95,00% CI of diff,	Below threshold?	Summary	Adjusted P Value
mDC control - mDC CK666
1	0.06945	-0,2537 to 0,3926	No	ns	>0,9999
2	-0.05165	-0,3748 to 0,2715	No	ns	>0,9999
3	0.0011	-0,3220 to 0,3242	No	ns	>0,9999
4	-0.0181	-0,3412 to 0,3050	No	ns	>0,9999
Test details	Mean 1	Mean 2	Mean Diff,	SE of diff,	N1	N2	t	DF
mDC control - mDC CK666
1	0.2972	0.2278	0.06945	0.05992	2	2	1.159	3
2	0.4378	0.4895	-0.05165	0.05992	2	2	0.8619	3
3	0.1162	0.1151	0.0011	0.05992	2	2	0.01836	3
4	0.1489	0.167	-0.0181	0.05992	2	2	0.302	3

## Sheet: Figure 2I
	mDC							mDC + SMIFH2
Nº molecules per spot	Experiment 1	Experiment 2	Experiment 3	Average	SEM		Nº molecules per spot	Experiment 1	Experiment 2	Experiment 3	Average	SEM
1	0.4242	0.1702	0.320911	0.305104	0.0737482		1	0.6133	0.3165	0.614867	0.514889	0.0991955
2	0.3235	0.5521	0.411617	0.429072	0.0665658		2	0.231	0.4276	0.324411	0.32767	0.0567769
3	0.1239	0.1084	0.11177	0.11469	0.00470664		3	0.0839	0.1048	0.032244	0.073648	0.0215632
>4	0.128666	0.1692	0.155702	0.151189	0.0119168		>4	0.0717009	0.1378	0.028457	0.0793193	0.0317936
Sample size	all siglec-1 spots from 9 cells	all siglec-1 spots from 10 cells	siglec-1 spots 18 cells				Sample size	all siglec-1 spots from 9 cells	all siglec-1 spots from 10 cells	siglec-1 spots 18 cells
Table Analyzed (TWO-WAY ANOVA
Two-way RM ANOVA	Matching: Across row
Assume sphericity?	Yes
Alpha	0.05
Source of Variation	% of total variation	P value	P value summary	Significant?
number of molec. x treatment	9.313	0.0002	***	Yes
number of molec.	73.02	<0,0001	****	Yes
treatment	0.000633	0.9559	ns	No
Experiment	15.29	0.0015	**	Yes
ANOVA table	SS	DF	MS	F (DFn, DFd)	P value
number of molec. x treatment	0.08487	3	0.02829	F (3, 12) = 15,67	P=0,0002
number of molec.	0.6654	3	0.2218	F (3, 12) = 19,11	P<0,0001
treatment	5.768e-06	1	5.768e-06	F (1, 12) = 0,003196	P=0,9559
Experiment	0.1393	12	0.01161	F (12, 12) = 6,431	P=0,0015
Residual	0.02166	12	0.001805
Difference between column means
Mean of mDC control	0.25
Mean of mDC SMIFH2	0.2492
Difference between means	0.0008491
SE of difference	0.01502
95% CI of difference	-0,03188 to 0,03358
Data summary
Number of columns (treatment)	2
Number of rows (number of molec.)	4
Number of subjects (Experiment)	16
Number of missing values	0
Bonferroni post test
Number of families	1
Number of comparisons per family	4
Alpha	0.05
Bonferroni's multiple comparisons test	Mean Diff,	95,00% CI of diff,	Below threshold?	Summary	Adjusted P Value
mDC control - mDC SMIFH2
1	-0.2098	-0,3027 to -0,1169	Yes	***	0.0004
2	0.1014	0,008467 to 0,1943	Yes	*	0.0324
3	0.04104	-0,05189 to 0,1340	No	ns	0.7782
4	0.07187	-0,02107 to 0,1648	No	ns	0.1526
Test details	Mean 1	Mean 2	Mean Diff,	SE of diff,	N1	N2	t	DF
mDC control - mDC SMIFH2
1	0.3051	0.5149	-0.2098	0.02899	3	3	7.237	8
2	0.4291	0.3277	0.1014	0.02899	3	3	3.498	8
3	0.1147	0.07365	0.04104	0.02899	3	3	1.416	8
4	0.1512	0.07932	0.07187	0.02899	3	3	2.479	8

## Sheet: Figure 2J
	Experiment 1	Control mDC															Experiment 1	Control mDC + SMIFH2
	D um2/s	cell 1	cell 2	cell 3	cell 4	cell 5	cell 6	cell 7	cell 8	cell	average	SD					D um2/s	cell 1	cell 2	cell 3	cell 4	cell 5	cell 6	cell 7	cell 8	cell 9	cell 10	cell 11	average	SD
	0	0	0	0	0	0	0	0	0	0	0	0					0	0	0	0	0	0*	0	0	0	0	0	0	0	0
	0.0002	0.0002	0	0	0	0	0	0	0	0	2.22222e-05	6.66667e-05					0.0002	0.0002	0	0	0	0*	0	0	0	0	0	0	2e-05	6.32456e-05
	0.0004	0.0004	0.013514	0	0.001042	0.003731	0.0518784	0.0272277	0.0267062	0.0121951	0.0151883	0.0173792					0.0004	0.0004	0	0	0.00203252	0,004477612*	0.000739098	0	0	0.0127119	0.00857633	0.00997506	0.00344349	0.00495433
	0.0006	0.0006	0.04955	0.001835	0.004167	0.012438	0.159213	0.106436	0.0682493	0.0264228	0.0476567	0.0550272					0.0006	0.0006	0.00694444	0	0.0101626	0,044776119*	0.00665188	0	0.00693374	0.0508475	0.0274443	0.0349127	0.0144497	0.0173647
	0.0008	0.0008	0.166667	0.005505	0.015625	0.014925	0.187835	0.0668317	0.0623145	0.050813	0.0634796	0.0691217					0.0008	0.0008	0.0208333	0.0362319	0.0264228	0,114925373*	0.0169993	0.0208333	0.0115562	0.0932203	0.0428816	0.0374065	0.0307185	0.0253727
	0.001	0.001	0.171171	0.023853	0.033333	0.021144	0.132379	0.0519802	0.0830861	0.0833333	0.0668089	0.0562703					0.001	0.001	0.03125	0.0362319	0.0528455	0,131343284*	0.0384331	0.0208333	0.0285054	0.135593	0.0668954	0.0498753	0.0461463	0.036301
	0.0012	0.0012	0.166667	0.047706	0.054167	0.032338	0.0930233	0.0618812	0.0949555	0.0792683	0.070134	0.0468356					0.0012	0.0012	0.03125	0.0289855	0.0752033	0,128358209*	0.0539542	0.0277778	0.0423729	0.0847458	0.0720412	0.0698254	0.0487356	0.0267656
	0.0014	0.0014	0.103604	0.040367	0.080208	0.048507	0.0930233	0.0767327	0.10089	0.0772358	0.0691075	0.0332683					0.0014	0.0014	0.0555556	0.0507246	0.0772358	0,114925373*	0.0820399	0.0555556	0.059322	0.0932203	0.0806175	0.0698254	0.0625497	0.0256103
	0.0016	0.0016	0.067568	0.091743	0.09375	0.068408	0.0518784	0.0816832	0.0593472	0.0691057	0.0650093	0.0275655					0.0016	0.0016	0.0833333	0.0869565	0.0609756	0,088059701*	0.0864745	0.0625	0.0570108	0.0677966	0.0720412	0.0773067	0.0655995	0.0249231
	0.0018	0.0018	0.063063	0.077064	0.089583	0.067164	0.0322004	0.0643564	0.0474777	0.0792683	0.0579974	0.0271525					0.0018	0.0018	0.0833333	0.0869565	0.0650407	0,06119403*	0.0702143	0.0729167	0.0654854	0.029661	0.0634648	0.0822943	0.0621167	0.0266035
	0.002	0.002	0.04955	0.080734	0.084375	0.070896	0.0304114	0.0594059	0.0534125	0.0711382	0.0557692	0.0262158					0.002	0.002	0.0555556	0.0434783	0.0569106	0,050746269*	0.0716925	0.0416667	0.0585516	0.0423729	0.0668954	0.0773067	0.051643	0.0213453
	0.0022	0.0022	0.036036	0.073394	0.072917	0.064677	0.0178891	0.0495049	0.0385757	0.0873984	0.0491769	0.0281117					0.0022	0.0022	0.0659722	0.0362319	0.050813	0,047761194*	0.0687361	0.0486111	0.0662558	0.0677966	0.0463122	0.0648379	0.0517767	0.0207266
	0.0024	0.0024	0.009009	0.07156	0.05625	0.062189	0.0232558	0.0470297	0.032641	0.046748	0.0390092	0.0238414					0.0024	0.0024	0.0555556	0.0434783	0.0325203	0,019402985*	0.0569106	0.0625	0.0662558	0.0254237	0.0291595	0.0673317	0.0441535	0.0213694
	0.0026	0.0026	0.009009	0.056881	0.05	0.048507	0.019678	0.0371287	0.0207715	0.0386179	0.0314659	0.0192157					0.0026	0.0026	0.03125	0.0289855	0.0426829	0,023880597*	0.0436068	0.0347222	0.0531587	0.029661	0.0360206	0.0473815	0.0350069	0.0139275
	0.0028	0.0028	0.013514	0.040367	0.051042	0.039801	0.0143113	0.0222772	0.0178042	0.054878	0.0285327	0.0184119					0.0028	0.0028	0.0451389	0.0362319	0.054878	0,02238806*	0.0406504	0.0451389	0.0431433	0.0338983	0.0428816	0.0548628	0.0399624	0.0147156
	0.003	0.003	0.009009	0.038532	0.035417	0.042289	0.0143113	0.0371287	0.0267062	0.0325203	0.0265459	0.0142722					0.003	0.003	0.0381944	0.0362319	0.0284553	0,019402985*	0.0354767	0.0486111	0.0423729	0.0211864	0.025729	0.0523691	0.0331627	0.0143879
	0.0032	0.0032	0.013514	0.034862	0.03125	0.034826	0.00894454	0.0148515	0.0504451	0.0203252	0.0235798	0.015215					0.0032	0.0032	0.0486111	0.0362319	0.0304878	0,031343284*	0.0391722	0.0347222	0.0300462	0.0169492	0.0343053	0.032419	0.0306145	0.0124769
	0.0034	0.0034	0.004505	0.038532	0.017708	0.031095	0.00715563	0.019802	0.00890208	0.0162602	0.0163733	0.0120998					0.0034	0.0034	0.0451389	0.0507246	0.0304878	0,010447761*	0.0317812	0.0381944	0.027735	0.0254237	0.025729	0.0299252	0.030854	0.0127969
	0.0036	0.0036	0.013514	0.022018	0.022917	0.034826	0.00715563	0.0222772	0.0148368	0.00813008	0.0165861	0.0098504					0.0036	0.0036	0.0381944	0.0507246	0.0203252	0,011940299*	0.0243902	0.0381944	0.0346687	0.0127119	0.0205832	0.0149626	0.0258355	0.014329
	0.0038	0.0038	0.004505	0.023853	0.017708	0.014925	0.00715563	0.00990099	0.00890208	0.0101626	0.0112125	0.00652218					0.0038	0.0038	0.0347222	0.00724638	0.0162602	0,014925373*	0.0162602	0.0104167	0.0354391	0.0169492	0.0171527	0.0349127	0.0193159	0.0117149
	0.004	0.004	0	0.023853	0.025	0.029851	0.00715563	0.0049505	0	0.0142276	0.0121153	0.0115009					0.004	0.004	0.0208333	0.0434783	0.0142276	0,010447761*	0.0192166	0.0416667	0.0308166	0.00423729	0.0188679	0.0124688	0.0209813	0.0138449
	0.0042	0.0042	0.004505	0.018349	0.016667	0.016169	0.00357782	0.0123762	0.0118694	0.0142276	0.0113268	0.0057929					0.0042	0.0042	0.0173611	0.0362319	0.0182927	0,005970149*	0.0177384	0.0243056	0.0215716	0.0254237	0.0137221	0.0124688	0.0191316	0.00860956
	0.0044	0.0044	0.004505	0.020183	0.010417	0.014925	0.00178891	0.0123762	0.00890208	0.0101626	0.00973998	0.0057377					0.0044	0.0044	0.0208333	0.0289855	0.0101626	0,002985075*	0.0199557	0.0243056	0.0146379	0.00847458	0.0137221	0.0149626	0.016044	0.00752759
	0.0046	0.0046	0	0.012844	0.017708	0.027363	0.00357782	0.00247525	0.00296736	0.00609756	0.00862589	0.00897005					0.0046	0.0046	0.0173611	0.0144928	0.0304878	0,007462687*	0.014782	0.0138889	0.0231125	0.0127119	0.0222985	0.00997506	0.016371	0.00734782
	0.0048	0.0048	0	0.009174	0.010417	0.017413	0	0.00247525	0	0.00406504	0.00537159	0.00593606					0.0048	0.0048	0.0243056	0.0289855	0.0142276	0,005970149*	0.0125647	0.0173611	0.0154083	0.00423729	0.0102916	0.0074813	0.0139663	0.00804396
	0.005	0.005	0	0.007339	0.00625	0.011194	0.00536673	0.00742574	0.00890208	0.00406504	0.0061714	0.00316561					0.005	0.005	0.00694444	0.0144928	0.00609756	0*	0.0125647	0.0277778	0.0138675	0	0.0120069	0.0074813	0.0106233	0.00755587
	0.0052	0.0052	0.004505	0.012844	0.010417	0.017413	0.00536673	0.00742574	0.0207715	0.00813008	0.0102303	0.00574008					0.0052	0.0052	0.0104167	0.0217391	0.0223577	0,002985075*	0.0118256	0.0208333	0.0154083	0.00423729	0.0171527	0.0074813	0.0136652	0.00683174
	0.0054	0.0054	0	0.016514	0.003125	0.00995	0.00178891	0.0049505	0.00890208	0.0121951	0.00698062	0.00533566					0.0054	0.0054	0.0138889	0.00724638	0.0162602	0,002985075*	0.0125647	0.00694444	0.0107858	0.00423729	0.0120069	0.00249377	0.00918283	0.00455204
	0.0056	0.0056	0	0.005505	0.011458	0.008706	0.00178891	0.00742574	0.00593472	0.0101626	0.00628677	0.00370599					0.0056	0.0056	0	0	0.00406504	0*	0.00886918	0.0138889	0.0107858	0.00847458	0.00171527	0	0.00533988	0.00500444
	0.0058	0.0058	0	0.007339	0.003125	0.007463	0.00178891	0.00247525	0.00593472	0.00203252	0.00399538	0.00269199					0.0058	0.0058	0.0104167	0.0144928	0.00813008	0*	0.00886918	0.00694444	0.0115562	0.0127119	0.0051458	0.00249377	0.00865608	0.00370783
	0.006	0.006	0.004505	0.007339	0.005208	0.007463	0	0.00742574	0.00296736	0.00406504	0.00499702	0.00246768					0.006	0.006	0	0.00724638	0.0101626	0,001492537*	0.00591279	0.0138889	0.00616333	0.00847458	0.00343053	0.00498753	0.00662666	0.00375608
	0.0062	0.0062	0.004505	0.00367	0.007292	0.006219	0	0.00742574	0.00593472	0.00406504	0.00503461	0.0023134					0.0062	0.0062	0.0104167	0.0144928	0.00609756	0,005970149*	0.00591279	0.0104167	0.0107858	0	0.00171527	0	0.00660375	0.00495329
	0.0064	0.0064	0.004505	0.00367	0.003125	0.008706	0	0.00742574	0.00593472	0.00203252	0.00464433	0.00275339					0.0064	0.0064	0.0104167	0	0.00609756	0*	0.00369549	0.0104167	0.0107858	0.00423729	0.00857633	0	0.00606258	0.00407027
	0.0066	0.0066	0	0.009174	0.00625	0.008706	0	0.0049505	0.00890208	0	0.00495362	0.00396056					0.0066	0.0066	0.00694444	0.00724638	0.0142276	0,002985075*	0.0118256	0.00694444	0.00924499	0	0.00857633	0	0.00716098	0.00448476
	0.0068	0.0068	0	0.005505	0.003125	0.003731	0	0.00247525	0.00593472	0	0.00306344	0.002672					0.0068	0.0068	0.0104167	0.00724638	0.00406504	0,001492537*	0.00517369	0.00694444	0.00924499	0.00423729	0.00171527	0	0.00558438	0.00321952
	0.007	0.007	0	0.005505	0.001042	0.002488	0.00178891	0	0	0	0.00198043	0.00260965					0.007	0.007	0.00347222	0	0.00813008	0,001492537*	0.0022173	0.00694444	0.00539291	0	0.0051458	0	0.00383028	0.00314729
	0.0072	0.0072	0.004505	0.001835	0.003125	0.012438	0.00178891	0.0049505	0.00593472	0.00406504	0.00509357	0.00327728					0.0072	0.0072	0.00347222	0	0.00609756	0*	0.00295639	0.00694444	0.0046225	0	0.00343053	0.00249377	0.00372174	0.00255785
	0.0074	0.0074	0	0.00367	0.003125	0.004975	0	0.00247525	0	0.00406504	0.0028567	0.00254828					0.0074	0.0074	0.0104167	0.0144928	0.00609756	0*	0.00517369	0.0104167	0.00231125	0	0.00686106	0	0.00631696	0.00470386
	0.0076	0.0076	0	0.011009	0.002083	0.003731	0.00178891	0	0.00296736	0.00203252	0.00346798	0.00362478					0.0076	0.0076	0.00347222	0	0.00203252	0*	0.00295639	0	0.00231125	0	0.00343053	0	0.00218029	0.00240974
	0.0078	0.0078	0	0.005505	0.004167	0.006219	0	0.00247525	0.00296736	0	0.00323707	0.00291139					0.0078	0.0078	0	0	0.00609756	0,001492537*	0.000739098	0	0.00308166	0	0.00343053	0	0.00211489	0.00288876
	0.008	0.008	0	0.00367	0.002083	0.002488	0.00178891	0.00247525	0.00593472	0.00203252	0.0031636	0.00241355					0.008	0.008	0.00347222	0.00724638	0.00609756	0*	0.00295639	0.00694444	0.0046225	0.00423729	0.00343053	0	0.00470073	0.0024229
	0.0082	0.0082	0	0.00367	0.002083	0.002488	0	0	0.00593472	0.00203252	0.00271203	0.00283712					0.0082	0.0082	0	0	0.00406504	0*	0.0014782	0.00694444	0.00308166	0.00423729	0.00343053	0.00249377	0.00339309	0.00267671
	0.0084	0.0084	0.004505	0.005505	0.003125	0.006219	0	0.00247525	0.00593472	0.00203252	0.00424405	0.00257324					0.0084	0.0084	0.00347222	0.00724638	0.0142276	0,001492537*	0.00517369	0.0138889	0.00231125	0	0.0102916	0	0.00650117	0.0052263
	0.0086	0.0086	0	0.001835	0.002083	0.001244	0.00178891	0.00247525	0	0	0.00200291	0.00265603					0.0086	0.0086	0	0	0.00203252	0*	0.00295639	0.00347222	0.0046225	0	0.00171527	0	0.00233989	0.00275775
	0.0088	0.0088	0	0.001835	0.003125	0.003731	0	0	0.00296736	0.00609756	0.00295066	0.00300252					0.0088	0.0088	0.00347222	0	0.00203252	0,002985075*	0.00369549	0.00694444	0.00616333	0.00423729	0.00343053	0.00249377	0.00412696	0.00256299
	0.009	0.009	0	0	0.002083	0.006219	0	0.00247525	0	0	0.00219747	0.00329169					0.009	0.009	0	0	0.00406504	0*	0.0014782	0.00347222	0.00385208	0	0.00343053	0	0.00252981	0.00287467
	0.0092	0.0092	0	0	0	0.002488	0	0	0	0.00406504	0.00175034	0.00315796					0.0092	0.0092	0.00347222	0.00724638	0.00609756	0*	0.00295639	0.0104167	0.00385208	0	0.00171527	0	0.00449566	0.0036409
	0.0094	0.0094	0	0.00367	0.001042	0.001244	0	0	0	0	0.00170622	0.00312773					0.0094	0.0094	0.00694444	0.0144928	0.00813008	0*	0.0014782	0.0104167	0.00308166	0	0.00171527	0	0.00556591	0.00501178
	0.0096	0.0096	0	0	0.001042	0.001244	0	0	0.00296736	0.00203252	0.00187621	0.00308318					0.0096	0.0096	0.00347222	0	0.00406504	0*	0.00295639	0	0.00385208	0	0.00171527	0.00249377	0.00281548	0.00287154
	0.0098	0.0098	0	0	0.002083	0.002488	0	0	0	0.00203252	0.00182261	0.00317811					0.0098	0.0098	0.00347222	0.00724638	0.00203252	0*	0.00369549	0.00347222	0.00308166	0	0.00171527	0	0.00345158	0.0030506
	0.01	0.01	0	0	0.001042	0.002488	0.00178891	0.0049505	0.00296736	0.00203252	0.0028077	0.00310184					0.01	0.01	0	0	0	0,001492537*	0.0014782	0	0.000770416	0	0	0	0.00122486	0.00312296

## Sheet: Figure 2K
Experiment 1	% of siglec-1 immobile fraction			Experiment 2	% of siglec-1 immobile fraction			Experiment 3	% of siglec-1 immobile fraction
cell nº	mDC	mDC + SMIFH2		cell nº	mDC	mDC + SMIFH2		cell nº	mDC	mDC + SMIFH2
cell 1	0.743243	0.375643		cell 1	0.682274	0.729167		cell 1	0.472727	0.385057
cell 2	0.218349	0.538136		cell 2	0.776515	0.594771		cell 2	0.378049	0.343173
cell 3	0.291667	0.354115		cell 3	0.845588	0.659664		cell 3	0.607362	0.4
cell 4	0.77102	0.299803		cell 4	0.69086	0.57931		cell 4	0.515924	0.319767
cell 5	0.473945	0.283571		cell 5	0.666667	0.634058		cell 5	0.498054	0.535316
cell 6	0.504451	0.177994		cell 6	0.741573	0.796875		cell 6	0.505263	0.492424
cell 7	0.404472	0.228188		cell 7	0.733146			cell 7	0.497006	0.408163
cell 8		0.232877		average	0.733803	0.665641		cell 8		0.297297
cell 9		0.630015		SD	0.0624334	0.0833867		average	0.496341	0.39765
average	0.486735	0.346705						SD	0.0675065	0.082213
SD	0.209739	0.149773
	% of siglec-1 immobile fraction
Experiment number	mDC	mDC + SMIFH2
Experiment 1	0.486735	0.346705
Experiment 2	0.496341	0.39765
Experiement 3	0.733803	0.665641
average	0.572293	0.469999
S.E.M	0.0808026	0.0989205
Table Analyzed (Pairedf T test)
Column B	SMIFH2 siglec-1 (immobile fraction)
vs.	vs,
Column A	Control siglec-1 (immobile fraction)
Paired t test
P value	0.039
P value summary	*
Significantly different (P < 0.05)?	Yes
One- or two-tailed P value?	Two-tailed
t, df	t=4,912, df=2
Number of pairs	3
How big is the difference?
Mean of differences (B - A)	-0.1023
SD of differences	0.03607
SEM of differences	0.02082
95% confidence interval	-0,1919 to -0,01269
R squared (partial eta squared)	0.9235
How effective was the pairing?
Correlation coefficient (r)	0.9934
P value (one tailed)	0.0366
P value summary	*
Was the pairing significantly effective?	Yes

## Sheet: Figure 2L
MSS slope	Experiment 1
	mDC									mDC + SMIFH2
	cell 1	cell 2	cell 3	cell 4	cell 5	cell 6	cell 7	average	SD	cell 1	cell 2	cell 3	cell 4	cell 5	cell 6	average	SD
<0.2	0.574713	0.539216	0.59375	0.684211	0.635659	0.56383	0.614458	0.600834	0.0487317	0.384615	0.532258	0.555556	0.344262	0.39604	0.480769	0.448917	0.0862732
0.2 to 0.5	0.333333	0.372549	0.328125	0.263158	0.333333	0.308511	0.325301	0.323473	0.0328879	0.461538	0.435484	0.382716	0.614754	0.524752	0.442308	0.476925	0.0816236
> 0.5	0.091954	0.0882353	0.078125	0.0526316	0.0310078	0.12766	0.060241	0.0756935	0.0313464	0.153846	0.0322581	0.0617284	0.0409836	0.079208	0.076923	0.0741579	0.0433451
MSS slope	Experiment 2
	mDC									mDC + SMIFH2
	cell 1	cell 2	cell 3	cell 4	cell 5	cell 6	cell 7	average	SD	cell 1	cell 2	cell 3	cell 4	cell 5	cell 6	cell 7	cell 8	average	SD
<0.2	0.574713	0.539216	0.59375	0.684211	0.635659	0.56383	0.614458	0.600834	0.0487317	0.560748	0.550562	0.454023	0.709402	0.624	0.58209	0.646552	0.515385	0.580345	0.0796384
0.2 to 0.5	0.333333	0.372549	0.328125	0.263158	0.333333	0.308511	0.325301	0.323473	0.0328879	0.392523	0.38764	0.482759	0.273504	0.312	0.298507	0.275862	0.407692	0.353811	0.0751243
> 0.5	0.091954	0.0882353	0.078125	0.0526316	0.0310078	0.12766	0.060241	0.0756935	0.0313464	0.046729	0.0617978	0.0632184	0.017094	0.064	0.119403	0.077586	0.076923	0.0658439	0.0290266
MSS slope	Experiment 3
	mDC										mDC + SMIFH2
	cell 1	cell 2	cell 3	cell 4	cell 5	cell 6	cell 7	cell 8	average	SD	cell 1	cell 2	cell 3	cell 4	cell 5	cell 6	cell 7	cell 8	average	SD
<0.2	0.63615	0.785714	0.73805	0.682891	0.516949	0.627358	0.73805	0.708904	0.679258	0.0845442	0.560748	0.550562	0.454023	0.709402	0.624	0.58209	0.646552	0.515385	0.580345	0.0796384
0.2 to 0.5	0.307512	0.160714	0.240918	0.272861	0.389831	0.325472	0.240918	0.267123	0.275669	0.0678634	0.392523	0.38764	0.482759	0.273504	0.312	0.298507	0.275862	0.407692	0.353811	0.0751243
> 0.5	0.056338	0.053571	0.021033	0.044248	0.09322	0.04717	0.021033	0.023973	0.0450733	0.0242704	0.046729	0.0617978	0.0632184	0.017094	0.064	0.119403	0.077586	0.076923	0.0658439	0.0290266
MSS slope	Mdc					mDC + SMIFH2
	Experiment 1	Experiment 2	Experiment 3	Average	SEM	Experiment 1	Experiment 2	Experiment 3	Average	SEM
0.2	0.573581	0.600834	0.679258	0.617891	0.031676	0.448917	0.580345	0.597158	0.54214	0.0468635
0.2-0.5	0.374513	0.323473	0.275669	0.324552	0.0285389	0.476925	0.353811	0.336274	0.389003	0.0442514
>0.5	0.051906	0.075694	0.045073	0.0575577	0.00928022	0.074158	0.065844	0.066568	0.0688567	0.00265889
Table Analyzed (Two way ANOVA)
Table Analyzed	Figure 2L (Classification MSS) Not in paper
Two-way RM ANOVA	Matching: Stacked
Assume sphericity?	Yes
Alpha	0.05
Source of Variation	% of total variation	P value	P value summary	Significant?
MSS slope x Treatment	1.18	0.0187	*	Yes
MSS slope	86.69	<0,0001	****	Yes
Treatment	1.463e-13	0.6841	ns	No
Subject	3.836e-11	>0,9999	ns	No
ANOVA table	SS	DF	MS	F (DFn, DFd)	P value
MSS slope x Treatment	0.08639	2	0.0432	F (2, 88) = 4,162	P=0,0187
MSS slope	6.346	2	3.173	F (2, 88) = 305,7	P<0,0001
Treatment	1.071e-14	1	1.071e-14	F (1, 44) = 0,1678	P=0,6841
Subject	2.808e-12	44	6.382e-14	F (44, 88) = 6,148e-012	P>0,9999
Residual	0.9134	88	0.01038
Difference between column means
Mean of Control	0.3333
Mean of SMIFH2	0.3333
Difference between means	1.764e-08
SE of difference	4.305e-08
95% CI of difference	-6,913e-008 to 1,044e-007
Data summary
Number of columns (Treatment)	2
Number of rows (MSS slope)	3
Number of subjects (Subject)	46
Number of missing values	0
Table Analyzed (Two way ANOVA)
Number of families	1
Number of comparisons per family	3
Alpha	0.05
Bonferroni's multiple comparisons test	Predicted (LS) mean diff,	95,00% CI of diff,	Below threshold?	Summary	Adjusted P Value
Control - SMIFH2
Row 1	0.06619	0,006650 to 0,1257	Yes	*	0.0238
Row 2	-0.05495	-0,1145 to 0,004584	No	ns	0.0807
Row 3	-0.01123	-0,07077 to 0,04830	No	ns	>0,9999
Test details	Predicted (LS) mean 1	Predicted (LS) mean 2	Predicted (LS) mean diff,	SE of diff,	N1	N2	t	DF
Control - SMIFH2
Row 1	0.6207	0.5545	0.06619	0.02455	22	24	2.696	132
Row 2	0.3223	0.3773	-0.05495	0.02455	22	24	2.238	132
Row 3	0.05699	0.06822	-0.01123	0.02455	22	24	0.4575	132
