# Supplementary material for: Actin-regulated Siglec-1 nanoclustering influences HIV-1 capture and virus-containing compartment formation in dendritic cells
Source: eLife journal article supplement (doi:10.7554/elife.78836), 2023-03-20
Supplement: fig2-figsupp1-data1 [file elife-78836-fig2-figsupp1-data1-v2.zip]

## Sheet: Figure S1B
	% of total intensity (in mDC)												% of total intensity (in mDC + CytoD)
	siglec				actin								siglec				actin
Distance from cell centre (% of radius)	Experiment 1	Experiment 2	average	SEM	Experiment 1	Experiment 2	average	SEM	average	SEM		Distance from cell centre (% of radius)	Experiment 1	Experiment 2	average	SEM	Experiment 1	Experiment 2	average	SEM
0.5	0.001123	0.002594	0.0018585	0.0007355	0.000677	0.000688	0.0006825	5.5e-06	0.00051325	0.00019545		0.5	0.002282	0.001298	0.00179	0.000492	0.000857	0.000917	0.000887	3e-05
1	0.001108	0.006664	0.003886	0.002778	0.001807	0.001788	0.0017975	9.5e-06	0.0013505	0.000516171		1	0.005083	0.003193	0.004138	0.000945	0.001996	0.002083	0.0020395	4.35e-05
1.5	0.002275	0.012698	0.0074865	0.0052115	0.003343	0.00309	0.0032165	0.0001265	0.002444	0.000893997		1.5	0.008309	0.005726	0.0070175	0.0012915	0.003367	0.00329	0.0033285	3.85e-05
2	0.003387	0.017817	0.010602	0.007215	0.004833	0.004753	0.004793	4e-05	0.00360475	0.0013722		2	0.010398	0.008037	0.0092175	0.0011805	0.00472	0.004602	0.004661	5.9e-05
2.5	0.004599	0.023255	0.013927	0.009328	0.006176	0.006182	0.006179	3e-06	0.004635	0.00178286		2.5	0.012557	0.010435	0.011496	0.001061	0.005881	0.005981	0.005931	5e-05
3	0.005404	0.031378	0.018391	0.012987	0.007515	0.007468	0.0074915	2.35e-05	0.0056245	0.00215585		3	0.015414	0.013775	0.0145945	0.0008195	0.007005	0.00749	0.0072475	0.0002425
3.5	0.006566	0.039874	0.02322	0.016654	0.00913	0.008579	0.0088545	0.0002755	0.00670975	0.00247995		3.5	0.01839	0.016014	0.017202	0.001188	0.008047	0.009135	0.008591	0.000544
4	0.008275	0.044863	0.026569	0.018294	0.010868	0.010142	0.010505	0.000363	0.0079695	0.00293274		4	0.022072	0.019958	0.021015	0.001057	0.009356	0.010974	0.010165	0.000809
4.5	0.010267	0.049552	0.0299095	0.0196425	0.012643	0.011192	0.0119175	0.0007255	0.0091195	0.0032489		4.5	0.024121	0.022608	0.0233645	0.0007565	0.010824	0.012544	0.011684	0.00086
5	0.012041	0.054903	0.033472	0.021431	0.014526	0.012273	0.0133995	0.0011265	0.0103313	0.00358249		5	0.025627	0.024501	0.025064	0.000563	0.011812	0.014142	0.012977	0.001165
5.5	0.012344	0.060115	0.0362295	0.0238855	0.016034	0.013722	0.014878	0.001156	0.0114475	0.00399851		5.5	0.026777	0.027548	0.0271625	0.0003855	0.012618	0.016035	0.0143265	0.0017085
6	0.013479	0.065278	0.0393785	0.0258995	0.017379	0.015674	0.0165265	0.0008525	0.012608	0.00454251		6	0.027469	0.031648	0.0295585	0.0020895	0.013425	0.017793	0.015609	0.002184
6.5	0.015436	0.067954	0.041695	0.026259	0.018606	0.017223	0.0179145	0.0006915	0.0136087	0.00498253		6.5	0.028544	0.03526	0.031902	0.003358	0.014474	0.019653	0.0170635	0.0025895
7	0.017346	0.069772	0.043559	0.026213	0.020027	0.018822	0.0194245	0.0006025	0.014719	0.00544086		7	0.0304	0.037514	0.033957	0.003557	0.015898	0.021921	0.0189095	0.0030115
7.5	0.018681	0.072141	0.045411	0.02673	0.021455	0.020407	0.020931	0.000524	0.0158292	0.00589617		7.5	0.031864	0.042009	0.0369365	0.0050725	0.01711	0.023651	0.0203805	0.0032705
8	0.019968	0.076199	0.0480835	0.0281155	0.023433	0.021948	0.0226905	0.0007425	0.0172035	0.0063455		8	0.034217	0.046002	0.0401095	0.0058925	0.018476	0.024992	0.021734	0.003258
8.5	0.020851	0.077865	0.049358	0.028507	0.025517	0.022665	0.024091	0.001426	0.0184248	0.00657726		8.5	0.036883	0.04441	0.0406465	0.0037635	0.019604	0.026792	0.023198	0.003594
9	0.021818	0.075943	0.0488805	0.0270625	0.02713	0.02295	0.02504	0.00209	0.0193025	0.00669795		9	0.038649	0.043982	0.0413155	0.0026665	0.021101	0.028922	0.0250115	0.0039105
9.5	0.024094	0.077179	0.0506365	0.0265425	0.029069	0.023892	0.0264805	0.0025885	0.0205075	0.00700414		9.5	0.041867	0.049951	0.045909	0.004042	0.022562	0.030466	0.026514	0.003952
10	0.025354	0.076842	0.051098	0.025744	0.031107	0.024468	0.0277875	0.0033195	0.0216705	0.00723457		10	0.044642	0.054428	0.049535	0.004893	0.023628	0.032335	0.0279815	0.0043535
10.5	0.026406	0.074958	0.050682	0.024276	0.03349	0.024813	0.0291515	0.0043385	0.0229482	0.00744915		10.5	0.04547	0.053075	0.0492725	0.0038025	0.024592	0.034224	0.029408	0.004816
11	0.02733	0.074177	0.0507535	0.0234235	0.036339	0.025495	0.030917	0.005422	0.0245433	0.00779097		11	0.045515	0.055999	0.050757	0.005242	0.02506	0.036003	0.0305315	0.0054715
11.5	0.028942	0.073475	0.0512085	0.0222665	0.038249	0.026873	0.032561	0.005688	0.0258427	0.00820789		11.5	0.047425	0.06064	0.0540325	0.0066075	0.025792	0.037266	0.031529	0.005737
12	0.031183	0.072309	0.051746	0.020563	0.039161	0.028139	0.03365	0.005511	0.0266152	0.00852835		12	0.049163	0.059467	0.054315	0.005152	0.02708	0.038461	0.0327705	0.0056905
12.5	0.033793	0.075403	0.054598	0.020805	0.040963	0.028651	0.034807	0.006156	0.0276442	0.00876516		12.5	0.050138	0.061762	0.05595	0.005812	0.028379	0.039738	0.0340585	0.0056795
13	0.036696	0.080654	0.058675	0.021979	0.042767	0.030089	0.036428	0.006339	0.0289058	0.0091856		13	0.054646	0.064564	0.059605	0.004959	0.028976	0.041236	0.035106	0.00613
13.5	0.039771	0.080008	0.0598895	0.0201185	0.044473	0.030923	0.037698	0.006775	0.0299672	0.00948083		13.5	0.058123	0.066592	0.0623575	0.0042345	0.030323	0.042787	0.036555	0.006232
14	0.043163	0.076878	0.0600205	0.0168575	0.046577	0.032054	0.0393155	0.0072615	0.031302	0.00986606		14	0.056717	0.073879	0.065298	0.008581	0.031953	0.044585	0.038269	0.006316
14.5	0.044541	0.077501	0.061021	0.01648	0.04844	0.032787	0.0406135	0.0078265	0.0324167	0.0101585		14.5	0.058451	0.082317	0.070384	0.011933	0.033206	0.045777	0.0394915	0.0062855
15	0.045245	0.080666	0.0629555	0.0177105	0.051028	0.033777	0.0424025	0.0086255	0.0339582	0.0105644		15	0.062804	0.080379	0.0715915	0.0087875	0.03421	0.047212	0.040711	0.006501
15.5	0.045225	0.08086	0.0630425	0.0178175	0.05242	0.034461	0.0434405	0.0089795	0.0348253	0.0108112		15.5	0.065571	0.076423	0.070997	0.005426	0.035107	0.048365	0.041736	0.006629
16	0.046013	0.082739	0.064376	0.018363	0.054205	0.03492	0.0445625	0.0096425	0.0358325	0.011058		16	0.070797	0.076969	0.073883	0.003086	0.036126	0.050091	0.0431085	0.0069825
16.5	0.047722	0.08848	0.068101	0.020379	0.056023	0.035466	0.0457445	0.0102785	0.036878	0.0113268		16.5	0.075467	0.080019	0.077743	0.002276	0.037442	0.051637	0.0445395	0.0070975
17	0.048905	0.090259	0.069582	0.020677	0.057404	0.03622	0.046812	0.010592	0.037757	0.0115869		17	0.07522	0.084262	0.079741	0.004521	0.038674	0.053374	0.046024	0.00735
17.5	0.051085	0.089563	0.070324	0.019239	0.059323	0.037731	0.048527	0.010796	0.0390943	0.0120223		17.5	0.07607	0.09094	0.083505	0.007435	0.040133	0.054935	0.047534	0.007401
18	0.051609	0.088945	0.070277	0.018668	0.061263	0.03917	0.0502165	0.0110465	0.040424	0.0124489		18	0.078933	0.095493	0.087213	0.00828	0.041896	0.057371	0.0496335	0.0077375
18.5	0.05273	0.09191	0.07232	0.01959	0.062968	0.040077	0.0515225	0.0114455	0.0415032	0.0127655		18.5	0.081854	0.093059	0.0874565	0.0056025	0.043008	0.059677	0.0513425	0.0083345
19	0.055105	0.095663	0.075384	0.020279	0.065226	0.041329	0.0532775	0.0119485	0.0429452	0.0131934		19	0.085236	0.092427	0.0888315	0.0035955	0.044192	0.061716	0.052954	0.008762
19.5	0.058588	0.10282	0.080704	0.022116	0.06744	0.042924	0.055182	0.012258	0.044451	0.0136722		19.5	0.088664	0.095913	0.0922885	0.0036245	0.045431	0.063518	0.0544745	0.0090435
20	0.063001	0.111196	0.0870985	0.0240975	0.06977	0.044548	0.057159	0.012611	0.046022	0.0141675		20	0.092228	0.099142	0.095685	0.003457	0.046329	0.065289	0.055809	0.00948
20.5	0.066075	0.112456	0.0892655	0.0231905	0.071344	0.045795	0.0585695	0.0127745	0.0471208	0.0145268		20.5	0.095388	0.099453	0.0974205	0.0020325	0.04738	0.067794	0.057587	0.010207
21	0.069415	0.111168	0.0902915	0.0208765	0.072646	0.047233	0.0599395	0.0127065	0.0481313	0.0148927		21	0.098099	0.102615	0.100357	0.002258	0.048418	0.06971	0.059064	0.010646
21.5	0.073183	0.110265	0.091724	0.018541	0.075178	0.049333	0.0622555	0.0129225	0.0499222	0.0154894		21.5	0.097108	0.112992	0.10505	0.007942	0.049789	0.071415	0.060602	0.010813
22	0.077462	0.111413	0.0944375	0.0169755	0.077472	0.051511	0.0644915	0.0129805	0.0516137	0.0160797		22	0.097284	0.115929	0.106606	0.0093225	0.050749	0.072347	0.061548	0.010799
22.5	0.078504	0.116574	0.097539	0.019035	0.080523	0.052467	0.066495	0.014028	0.0533782	0.0165266		22.5	0.098539	0.115741	0.10714	0.008601	0.051339	0.074739	0.063039	0.0117
23	0.081287	0.128315	0.104801	0.023514	0.083001	0.053989	0.068495	0.014506	0.0549978	0.0170195		23	0.097076	0.118765	0.107921	0.0108445	0.05242	0.076819	0.0646195	0.0121995
23.5	0.085201	0.136435	0.110818	0.025617	0.085669	0.055586	0.0706275	0.0150415	0.056731	0.0175431		23.5	0.096414	0.123163	0.109788	0.0133745	0.053687	0.079679	0.066683	0.012996
24	0.088235	0.134332	0.111284	0.0230485	0.087197	0.056758	0.0719775	0.0152195	0.057788	0.0178866		24	0.09691	0.130178	0.113544	0.016634	0.054903	0.082226	0.0685645	0.0136615
24.5	0.090987	0.132564	0.111775	0.0207885	0.088875	0.056782	0.0728285	0.0160465	0.058633	0.0180528		24.5	0.09765	0.132958	0.115304	0.017654	0.056484	0.084446	0.070465	0.013981
25	0.093846	0.134693	0.114269	0.0204235	0.091857	0.056697	0.074277	0.01758	0.0601027	0.0183455		25	0.098688	0.132833	0.115761	0.0170725	0.058091	0.086433	0.072262	0.014171
25.5	0.097395	0.139148	0.118272	0.0208765	0.096192	0.058052	0.077122	0.01907	0.062609	0.0190171		25.5	0.10235	0.133323	0.117836	0.0154865	0.060222	0.08841	0.074316	0.014094
26	0.102826	0.139444	0.121135	0.018309	0.099297	0.05926	0.0792785	0.0200185	0.0644635	0.0195371		26	0.105128	0.141274	0.123201	0.018073	0.061572	0.090516	0.076044	0.014472
26.5	0.107019	0.135082	0.121051	0.0140315	0.101212	0.060959	0.0810855	0.0201265	0.0658457	0.0199921		26.5	0.107313	0.156289	0.131801	0.024488	0.063077	0.092471	0.077774	0.014697
27	0.10893	0.135926	0.122428	0.013498	0.104065	0.063873	0.083969	0.020096	0.0680007	0.0207298		27	0.111487	0.159134	0.135311	0.0238235	0.064713	0.094252	0.0794825	0.0147695
27.5	0.1126	0.139069	0.125835	0.0132345	0.106711	0.065433	0.086072	0.020639	0.0697137	0.0212473		27.5	0.114824	0.156797	0.135811	0.0209865	0.067078	0.096683	0.0818805	0.0148025
28	0.116691	0.138992	0.127841	0.0111505	0.109542	0.066784	0.088163	0.021379	0.071467	0.0217542		28	0.115543	0.158321	0.136932	0.021389	0.069631	0.098685	0.084158	0.014527
28.5	0.123802	0.134295	0.129049	0.0052465	0.112739	0.068356	0.0905475	0.0221915	0.0734585	0.0223342		28.5	0.114271	0.162815	0.138543	0.024272	0.07116	0.102435	0.0867975	0.0156375
29	0.124958	0.135723	0.13034	0.0053825	0.115711	0.071142	0.0934265	0.0222845	0.075641	0.0230677		29	0.112612	0.1695	0.141056	0.028444	0.074337	0.106617	0.090477	0.01614
29.5	0.122786	0.141071	0.131929	0.0091425	0.118033	0.073632	0.0958325	0.0222005	0.0774245	0.0236924		29.5	0.115871	0.175181	0.145526	0.029655	0.076809	0.110144	0.0934765	0.0166675
30	0.123255	0.138215	0.130735	0.00748	0.12078	0.075437	0.0981085	0.0226715	0.0792493	0.024258		30	0.119505	0.174937	0.147221	0.027716	0.078982	0.112498	0.09574	0.016758
30.5	0.123622	0.133167	0.128394	0.0047725	0.122394	0.076696	0.099545	0.022849	0.080371	0.0246213		30.5	0.120814	0.177192	0.149003	0.028189	0.08104	0.114611	0.0978255	0.0167855
31	0.124022	0.130159	0.12709	0.0030685	0.125371	0.078315	0.101843	0.023528	0.0822642	0.0251817		31	0.120948	0.178601	0.149775	0.0288265	0.08312	0.116411	0.0997655	0.0166455
31.5	0.127404	0.129725	0.128564	0.0011605	0.127738	0.080193	0.103965	0.0237725	0.0839172	0.0257195		31.5	0.126108	0.184623	0.155365	0.0292575	0.085616	0.118086	0.101851	0.016235
32	0.127211	0.134538	0.130875	0.0036635	0.128837	0.082498	0.105667	0.0231695	0.085043	0.0262003		32	0.132487	0.194826	0.163656	0.0311695	0.088487	0.120192	0.10434	0.0158525
32.5	0.130169	0.140944	0.135557	0.0053875	0.132154	0.084718	0.108436	0.023718	0.0872565	0.0268906		32.5	0.137113	0.199635	0.168374	0.031261	0.091685	0.124001	0.107843	0.016158
33	0.130531	0.146404	0.138468	0.0079365	0.135184	0.086047	0.110616	0.0245685	0.0891037	0.027407		33	0.139437	0.19811	0.168774	0.0293365	0.094797	0.128502	0.11165	0.0168525
33.5	0.134953	0.151112	0.143033	0.0080795	0.137126	0.088286	0.112706	0.02442	0.0906345	0.0279652		33.5	0.140573	0.193308	0.16694	0.0263675	0.097664	0.130862	0.114263	0.016599
34	0.139729	0.154127	0.146928	0.007199	0.139633	0.090906	0.115269	0.0243635	0.092543	0.0286455		34	0.142333	0.194832	0.168582	0.0262495	0.100115	0.133331	0.116723	0.016608
34.5	0.14325	0.155987	0.149618	0.0063685	0.142577	0.094325	0.118451	0.024126	0.0948698	0.029509		34.5	0.139685	0.203368	0.171526	0.0318415	0.102777	0.135901	0.119339	0.016562
35	0.14667	0.159353	0.153011	0.0063415	0.14617	0.09757	0.12187	0.0243	0.0974775	0.0304063		35	0.141256	0.204613	0.172934	0.0316785	0.1053	0.140197	0.122748	0.0174485
35.5	0.150389	0.162571	0.15648	0.006091	0.148629	0.100124	0.124377	0.0242525	0.0993455	0.0310823		35.5	0.143416	0.200959	0.172187	0.0287715	0.108931	0.14216	0.125546	0.0166145
36	0.1499	0.166963	0.158432	0.0085315	0.150974	0.101671	0.126323	0.0246515	0.100905	0.0315667		36	0.14644	0.202027	0.174233	0.0277935	0.111717	0.143366	0.127542	0.0158245
36.5	0.150144	0.166134	0.158139	0.007995	0.154361	0.103528	0.128944	0.0254165	0.103063	0.0321982		36.5	0.15431	0.212681	0.183496	0.0291855	0.116223	0.14604	0.131132	0.0149085
37	0.151377	0.16536	0.158369	0.0069915	0.156807	0.105447	0.131127	0.02568	0.104765	0.0327588		37	0.161103	0.209699	0.185401	0.024298	0.120824	0.14929	0.135057	0.014233
37.5	0.154179	0.169604	0.161892	0.0077125	0.159312	0.107916	0.133614	0.025698	0.106635	0.0334252		37.5	0.16545	0.211275	0.188362	0.0229125	0.126151	0.152509	0.13933	0.013179
38	0.157398	0.17534	0.166369	0.008971	0.162141	0.110018	0.13608	0.0260615	0.108575	0.0340529		38	0.168466	0.210442	0.189454	0.020988	0.131149	0.15524	0.143195	0.0120455
38.5	0.164713	0.179676	0.172195	0.0074815	0.165797	0.112856	0.139326	0.0264705	0.111112	0.0348867		38.5	0.171608	0.202914	0.187261	0.015653	0.136137	0.159619	0.147878	0.011741
39	0.173628	0.18502	0.179324	0.005696	0.168766	0.115974	0.14237	0.026396	0.113377	0.0357164		39	0.174402	0.201337	0.187869	0.0134675	0.141884	0.162723	0.152304	0.0104195
39.5	0.179418	0.186065	0.182742	0.0033235	0.171917	0.11884	0.145378	0.0265385	0.115669	0.036516		39.5	0.178386	0.206176	0.192281	0.013895	0.147116	0.165688	0.156402	0.009286
40	0.180096	0.191147	0.185621	0.0055255	0.176416	0.122099	0.149257	0.0271585	0.118733	0.0375001		40	0.182745	0.205276	0.19401	0.0112655	0.152219	0.168199	0.160209	0.00799
40.5	0.179268	0.197148	0.188208	0.00894	0.180561	0.125163	0.152862	0.027699	0.121571	0.0384185		40.5	0.190087	0.202244	0.196165	0.0060785	0.158743	0.171498	0.165121	0.0063775
41	0.180239	0.201503	0.190871	0.010632	0.185646	0.128119	0.156883	0.0287635	0.124853	0.039392		41	0.196686	0.204089	0.200387	0.0037015	0.163025	0.173963	0.168494	0.005469
41.5	0.183866	0.208603	0.196235	0.0123685	0.190466	0.130758	0.160612	0.029854	0.127922	0.0402848		41.5	0.198695	0.205458	0.202076	0.0033815	0.169178	0.176777	0.172978	0.0037995
42	0.187921	0.217483	0.202702	0.014781	0.194616	0.133136	0.163876	0.03074	0.130592	0.0410742		42	0.200168	0.208488	0.204328	0.00416	0.176218	0.179783	0.178001	0.0017825
42.5	0.193309	0.218947	0.206128	0.012819	0.197692	0.135894	0.166793	0.030899	0.13282	0.0418461		42.5	0.206028	0.216054	0.211041	0.005013	0.184105	0.18315	0.183627	0.0004775
43	0.204277	0.216733	0.210505	0.006228	0.200885	0.139117	0.170001	0.030884	0.135222	0.0427172		43	0.215169	0.221779	0.218474	0.003305	0.191434	0.187478	0.189456	0.001978
43.5	0.20995	0.220836	0.215393	0.005443	0.204706	0.141988	0.173347	0.031359	0.13785	0.0435727		43.5	0.224714	0.228173	0.226443	0.0017295	0.196759	0.192314	0.194537	0.0022225
44	0.217171	0.228674	0.222922	0.0057515	0.208361	0.145674	0.177017	0.0313435	0.140599	0.0445727		44	0.22993	0.228006	0.228968	0.000962	0.204341	0.196181	0.200261	0.00408
44.5	0.224079	0.230804	0.227442	0.0033625	0.213085	0.150188	0.181636	0.0314485	0.14409	0.0458201		44.5	0.233636	0.217375	0.225506	0.0081305	0.211168	0.200724	0.205946	0.005222
45	0.233924	0.228222	0.231073	0.002851	0.217714	0.153763	0.185739	0.0319755	0.147298	0.0468771		45	0.24333	0.21287	0.2281	0.01523	0.218194	0.203363	0.210778	0.0074155
45.5	0.244442	0.229146	0.236794	0.007648	0.222488	0.157801	0.190144	0.0323435	0.150694	0.0480371		45.5	0.248458	0.212458	0.230458	0.018	0.225077	0.205893	0.215485	0.009592
46	0.254508	0.237902	0.246205	0.008303	0.226673	0.161706	0.19419	0.0324835	0.153763	0.0491279		46	0.250953	0.209458	0.230206	0.0207475	0.229634	0.209792	0.219713	0.009921
46.5	0.26598	0.241845	0.253912	0.0120675	0.231351	0.165841	0.198596	0.032755	0.157136	0.0503026		46.5	0.256404	0.210175	0.23329	0.0231145	0.235291	0.213921	0.224606	0.010685
47	0.276388	0.241671	0.25903	0.0173585	0.238526	0.169994	0.20426	0.034266	0.161762	0.0516632		47	0.265126	0.213066	0.239096	0.02603	0.240042	0.217308	0.228675	0.011367
47.5	0.285711	0.242697	0.264204	0.021507	0.245266	0.173442	0.209354	0.035912	0.165993	0.052853		47.5	0.265301	0.221285	0.243293	0.022008	0.24458	0.219899	0.232239	0.0123405
48	0.289849	0.24702	0.268435	0.0214145	0.250881	0.177647	0.214264	0.036617	0.169852	0.0541094		48	0.269646	0.234261	0.251953	0.0176925	0.247088	0.222263	0.234675	0.0124125
48.5	0.300279	0.25733	0.278805	0.0214745	0.256986	0.182639	0.219812	0.0371735	0.174153	0.0555593		48.5	0.272875	0.235276	0.254076	0.0187995	0.249237	0.225164	0.2372	0.0120365
49	0.310288	0.259627	0.284957	0.0253305	0.264441	0.186309	0.225375	0.039066	0.178798	0.0568483		49	0.275312	0.237182	0.256247	0.019065	0.250442	0.227533	0.238988	0.0114545
49.5	0.32114	0.249517	0.285328	0.0358115	0.271218	0.191083	0.231151	0.0400675	0.18338	0.0583051		49.5	0.277413	0.237644	0.257528	0.0198845	0.251668	0.230323	0.240996	0.0106725
50	0.333879	0.242798	0.288338	0.0455405	0.280326	0.19633	0.238328	0.041998	0.189246	0.060034		50	0.283702	0.235845	0.259773	0.0239285	0.252872	0.234129	0.243501	0.0093715
50.5	0.342328	0.241634	0.291981	0.050347	0.288125	0.201876	0.245001	0.0431245	0.194531	0.0617206		50.5	0.289386	0.239884	0.264635	0.024751	0.252089	0.237406	0.244748	0.0073415
51	0.353466	0.24464	0.299053	0.054413	0.297706	0.20797	0.252838	0.044868	0.200846	0.0636526		51	0.298993	0.247559	0.273276	0.025717	0.25349	0.240834	0.247162	0.006328
51.5	0.360703	0.253299	0.307001	0.053702	0.306199	0.213466	0.259833	0.0463665	0.206466	0.0653839		51.5	0.30427	0.249369	0.276819	0.0274505	0.254709	0.245236	0.249973	0.0047365
52	0.365695	0.259903	0.312799	0.052896	0.31357	0.219199	0.266385	0.0471855	0.211585	0.067073		52	0.307033	0.255325	0.281179	0.025854	0.255267	0.250521	0.252894	0.002373
52.5	0.379609	0.261866	0.320738	0.0588715	0.322614	0.22406	0.273337	0.049277	0.217322	0.0687254		52.5	0.308148	0.24971	0.278929	0.029219	0.258274	0.254891	0.256582	0.0016915
53	0.395994	0.262768	0.329381	0.066613	0.331565	0.230607	0.281086	0.050479	0.223434	0.0706957		53	0.308829	0.241229	0.275029	0.0338	0.260814	0.258868	0.259841	0.000973
53.5	0.402025	0.269747	0.335886	0.066139	0.341929	0.23599	0.288959	0.0529695	0.229962	0.0725565		53.5	0.31197	0.237357	0.274664	0.0373065	0.263291	0.261315	0.262303	0.000988
54	0.408687	0.272808	0.340747	0.0679395	0.34977	0.241861	0.295816	0.0539545	0.23535	0.0743077		54	0.316848	0.232729	0.274788	0.0420595	0.266655	0.262841	0.264748	0.001907
54.5	0.418724	0.270471	0.344598	0.0741265	0.357924	0.247415	0.30267	0.0552545	0.240816	0.0760239		54.5	0.319664	0.227441	0.273552	0.0461115	0.26863	0.264782	0.266706	0.001924
55	0.437175	0.270995	0.354085	0.08309	0.366461	0.251291	0.308876	0.057585	0.246053	0.0774542		55	0.321685	0.225109	0.273397	0.048288	0.271262	0.264677	0.267969	0.0032925
55.5	0.454561	0.278301	0.366431	0.08813	0.374713	0.256333	0.315523	0.05919	0.25144	0.0790828		55.5	0.324696	0.222811	0.273753	0.0509425	0.273837	0.267194	0.270516	0.0033215
56	0.470922	0.284996	0.377959	0.092963	0.384225	0.260874	0.322549	0.0616755	0.257331	0.0807253		56	0.328035	0.220876	0.274456	0.0535795	0.276756	0.270562	0.273659	0.003097
56.5	0.490901	0.280651	0.385776	0.105125	0.393975	0.266776	0.330376	0.0635995	0.263682	0.0826417		56.5	0.329249	0.223903	0.276576	0.052673	0.279776	0.272983	0.27638	0.0033965
57	0.506356	0.267224	0.38679	0.119566	0.403289	0.271466	0.337377	0.0659115	0.269511	0.0843004		57	0.331354	0.228856	0.280105	0.051249	0.281437	0.27497	0.278203	0.0032335
57.5	0.517745	0.259102	0.388424	0.129321	0.414971	0.27568	0.345325	0.0696455	0.276406	0.0860882		57.5	0.339238	0.237155	0.288196	0.0510415	0.28606	0.276412	0.281236	0.004824
58	0.528762	0.260909	0.394836	0.133926	0.422909	0.280258	0.351583	0.0713255	0.281519	0.0876122		58	0.341342	0.242416	0.291879	0.049463	0.290528	0.278692	0.28461	0.005918
58.5	0.536603	0.266569	0.401586	0.135017	0.431226	0.285837	0.358532	0.0726945	0.287072	0.0893471		58.5	0.334417	0.246638	0.290527	0.0438895	0.2952	0.281499	0.28835	0.0068505
59	0.542398	0.270723	0.40656	0.135838	0.437235	0.290989	0.364112	0.073123	0.291365	0.0907989		59	0.329402	0.240929	0.285165	0.0442365	0.300505	0.283234	0.29187	0.0086355
59.5	0.549464	0.272697	0.41108	0.138384	0.441804	0.296573	0.369188	0.0726155	0.295045	0.0922031		59.5	0.330969	0.236981	0.283975	0.046994	0.303631	0.285901	0.294766	0.008865
60	0.55359	0.282948	0.418269	0.135321	0.44739	0.301325	0.374358	0.0730325	0.299026	0.0935504		60	0.336439	0.241354	0.288897	0.0475425	0.30917	0.288056	0.298613	0.010557
60.5	0.554119	0.297575	0.425847	0.128272	0.452302	0.305677	0.378989	0.0733125	0.30257	0.0947677		60.5	0.350467	0.24083	0.295648	0.0548185	0.31528	0.291379	0.30333	0.0119505
61	0.558681	0.308593	0.433637	0.125044	0.458958	0.309859	0.384408	0.0745495	0.306944	0.0961045		61	0.359253	0.236583	0.297918	0.061335	0.322742	0.293551	0.308146	0.0145955
61.5	0.563396	0.312965	0.43818	0.125216	0.46579	0.315261	0.390525	0.0752645	0.31171	0.0976795		61.5	0.365679	0.234464	0.300071	0.0656075	0.329707	0.295528	0.312617	0.0170895
62	0.56679	0.312945	0.439867	0.126923	0.470864	0.319348	0.395106	0.075758	0.315269	0.0988635		62	0.368651	0.237881	0.303266	0.065385	0.333624	0.299036	0.31633	0.017294
62.5	0.566789	0.315057	0.440923	0.125866	0.474346	0.322995	0.39867	0.0756755	0.317922	0.099832		62.5	0.367642	0.236781	0.302212	0.0654305	0.339946	0.299662	0.319804	0.020142
63	0.569015	0.308975	0.438995	0.13002	0.477887	0.324694	0.40129	0.0765965	0.320117	0.100446		63	0.367555	0.237428	0.302492	0.0650635	0.345278	0.300607	0.322943	0.0223355
63.5	0.573247	0.297042	0.435144	0.138102	0.480273	0.327787	0.40403	0.076243	0.322083	0.10122		63.5	0.376427	0.236055	0.306241	0.070186	0.35081	0.302017	0.326414	0.0243965
64	0.574729	0.299508	0.437119	0.13761	0.483885	0.33047	0.407177	0.0767075	0.32456	0.102022		64	0.386838	0.235476	0.311157	0.075681	0.356243	0.30299	0.329616	0.0266265
64.5	0.573886	0.303466	0.438676	0.13521	0.488055	0.332927	0.410491	0.077564	0.327259	0.102828		64.5	0.393654	0.235161	0.314408	0.0792465	0.362778	0.30345	0.333114	0.029664
65	0.566196	0.301681	0.433939	0.132258	0.494632	0.33449	0.414561	0.080071	0.330939	0.103674		65	0.396577	0.232847	0.314712	0.081865	0.370211	0.304442	0.337326	0.0328845
65.5	0.561697	0.297504	0.4296	0.132096	0.498042	0.337992	0.418017	0.080025	0.333519	0.104609		65.5	0.400183	0.241888	0.321036	0.0791475	0.377611	0.304585	0.341098	0.036513
66	0.56229	0.297039	0.429665	0.132625	0.500889	0.341897	0.421393	0.079496	0.335919	0.105572		66	0.406239	0.247544	0.326892	0.0793475	0.381912	0.302292	0.342102	0.03981
66.5	0.565797	0.295065	0.430431	0.135366	0.502527	0.345172	0.423849	0.0786775	0.337556	0.106321		66.5	0.414615	0.245991	0.330303	0.084312	0.386588	0.301388	0.343988	0.0426
67	0.568388	0.288521	0.428455	0.139933	0.504414	0.347925	0.426169	0.0782445	0.339188	0.106996		67	0.421337	0.237264	0.3293	0.0920365	0.390747	0.299837	0.345292	0.045455
67.5	0.569656	0.281718	0.425687	0.143969	0.503316	0.350508	0.426912	0.076404	0.339285	0.107402		67.5	0.421867	0.227306	0.324587	0.0972805	0.394905	0.299964	0.347434	0.0474705
68	0.57112	0.282016	0.426568	0.144552	0.503097	0.353879	0.428488	0.074609	0.340018	0.108041		68	0.428275	0.223549	0.325912	0.102363	0.401277	0.3017	0.351488	0.0497885
68.5	0.566787	0.278182	0.422485	0.144302	0.504008	0.354414	0.429211	0.074797	0.340608	0.108216		68.5	0.430558	0.222556	0.326557	0.104001	0.406933	0.302958	0.354946	0.0519875
69	0.560308	0.270404	0.415356	0.144952	0.502843	0.354759	0.428801	0.074042	0.340111	0.108195		69	0.435939	0.227636	0.331788	0.104151	0.412405	0.301808	0.357106	0.0552985
69.5	0.553958	0.267379	0.410668	0.143289	0.500826	0.356296	0.428561	0.072265	0.339487	0.108349		69.5	0.438834	0.228883	0.333859	0.104976	0.415208	0.303116	0.359162	0.056046
70	0.551849	0.271705	0.411777	0.140072	0.49873	0.358368	0.428549	0.070181	0.338957	0.108613		70	0.434419	0.231169	0.332794	0.101625	0.417759	0.305012	0.361386	0.0563735
70.5	0.552413	0.278546	0.41548	0.136934	0.494309	0.359352	0.426831	0.0674785	0.336993	0.108504		70.5	0.428303	0.23486	0.331581	0.0967215	0.420417	0.303814	0.362115	0.0583015
71	0.546517	0.282997	0.414757	0.13176	0.489216	0.360939	0.425077	0.0641385	0.334843	0.108492		71	0.421765	0.232613	0.327189	0.094576	0.421574	0.300376	0.360975	0.060599
71.5	0.533128	0.277256	0.405192	0.127936	0.486148	0.363028	0.424588	0.06156	0.333831	0.108741		71.5	0.419973	0.228768	0.324371	0.0956025	0.42348	0.296774	0.360127	0.063353
72	0.520984	0.280731	0.400857	0.120126	0.481494	0.365425	0.423459	0.0580345	0.332103	0.108979		72	0.409049	0.229635	0.319342	0.089707	0.423693	0.292251	0.357972	0.065721
72.5	0.509983	0.280901	0.395442	0.114541	0.480214	0.365655	0.422934	0.0572795	0.331521	0.108954		72.5	0.399415	0.234604	0.317009	0.0824055	0.424578	0.287025	0.355801	0.0687765
73	0.492409	0.278884	0.385647	0.106763	0.474418	0.365333	0.419876	0.0545425	0.328542	0.108552		73	0.390358	0.241555	0.315956	0.0744015	0.426035	0.281585	0.35381	0.072225
73.5	0.479993	0.277013	0.378503	0.10149	0.471918	0.3668	0.419359	0.052559	0.327659	0.108746		73.5	0.377083	0.2399	0.308492	0.0685915	0.424779	0.278724	0.351751	0.0730275
74	0.468543	0.275071	0.371807	0.096736	0.467141	0.367266	0.417203	0.0499375	0.325387	0.108603		74	0.369939	0.2302	0.300069	0.0698695	0.424902	0.276803	0.350853	0.0740495
74.5	0.454711	0.264331	0.359521	0.09519	0.461029	0.366867	0.413948	0.047081	0.322231	0.108206		74.5	0.368357	0.225113	0.296735	0.071622	0.425791	0.272733	0.349262	0.076529
75	0.443986	0.262164	0.353075	0.090911	0.455685	0.367241	0.411463	0.044222	0.319653	0.108044		75	0.36853	0.227785	0.298158	0.0703725	0.424135	0.269123	0.346629	0.077506
75.5	0.434669	0.266031	0.35035	0.084319	0.450847	0.366704	0.408775	0.0420715	0.317099	0.1077		75.5	0.367121	0.230862	0.298991	0.0681295	0.422893	0.263603	0.343248	0.079645
76	0.43089	0.274549	0.352719	0.0781705	0.444597	0.366077	0.405337	0.03926	0.313818	0.107286		76	0.36575	0.226338	0.296044	0.069706	0.422456	0.258878	0.340667	0.081789
76.5	0.425575	0.280852	0.353213	0.0723615	0.439554	0.365096	0.402325	0.037229	0.311051	0.106845		76.5	0.360435	0.219969	0.290202	0.070233	0.418056	0.255413	0.336734	0.0813215
77	0.416863	0.283189	0.350026	0.066837	0.433266	0.364193	0.398729	0.0345365	0.307681	0.106387		77	0.355622	0.21818	0.286901	0.068721	0.413808	0.25226	0.333034	0.080774
77.5	0.402367	0.28403	0.343198	0.0591685	0.425945	0.363063	0.394504	0.031441	0.303738	0.10585		77.5	0.34709	0.218772	0.282931	0.064159	0.412809	0.247722	0.330265	0.0825435
78	0.388416	0.278646	0.333531	0.054885	0.421921	0.361214	0.391567	0.0303535	0.301264	0.105251		78	0.341242	0.218584	0.279913	0.061329	0.407405	0.24438	0.325893	0.0815125
78.5	0.376757	0.270753	0.323755	0.053002	0.416662	0.357391	0.387026	0.0296355	0.297679	0.104111		78.5	0.33246	0.22157	0.277015	0.055445	0.40297	0.241269	0.32212	0.0808505
79	0.36821	0.270714	0.319462	0.048748	0.410406	0.353295	0.38185	0.0285555	0.293527	0.102872		79	0.327047	0.214627	0.270837	0.05621	0.399332	0.235386	0.317359	0.081973
79.5	0.35165	0.269222	0.310436	0.041214	0.402558	0.350188	0.376373	0.026185	0.288826	0.101841		79.5	0.323238	0.203429	0.263333	0.0599045	0.396298	0.230681	0.313489	0.0828085
80	0.341499	0.281567	0.311533	0.029966	0.396691	0.346963	0.371827	0.024864	0.285086	0.100843		80	0.313387	0.202598	0.257993	0.0553945	0.390047	0.226673	0.30836	0.081687
80.5	0.33783	0.288719	0.313275	0.0245555	0.391037	0.344813	0.367925	0.023112	0.281722	0.100133		80.5	0.297707	0.196876	0.247291	0.0504155	0.382457	0.220526	0.301492	0.0809655
81	0.334625	0.283446	0.309036	0.0255895	0.383491	0.341177	0.362334	0.021157	0.27704	0.098993		81	0.287235	0.194164	0.2407	0.0465355	0.376792	0.216192	0.296492	0.0803
81.5	0.331877	0.263579	0.297728	0.034149	0.375886	0.336106	0.355996	0.01989	0.271969	0.0974774		81.5	0.277046	0.186373	0.23171	0.0453365	0.37041	0.212803	0.291606	0.0788035
82	0.331456	0.249134	0.290295	0.041161	0.369605	0.330731	0.350168	0.019437	0.267485	0.0959125		82	0.272272	0.177112	0.224692	0.04758	0.36621	0.208355	0.287282	0.0789275
82.5	0.325747	0.247103	0.286425	0.039322	0.362357	0.323936	0.343147	0.0192105	0.262163	0.0939497		82.5	0.266752	0.170057	0.218405	0.0483475	0.356573	0.203823	0.280198	0.076375
83	0.317171	0.248994	0.283083	0.0340885	0.353491	0.317442	0.335467	0.0180245	0.256106	0.0920307		83	0.263388	0.166622	0.215005	0.048383	0.346406	0.199135	0.272771	0.0736355
83.5	0.309521	0.243129	0.276325	0.033196	0.342593	0.312124	0.327358	0.0152345	0.249327	0.0903882		83.5	0.261197	0.159674	0.210435	0.0507615	0.340275	0.194147	0.267211	0.073064
84	0.301426	0.231726	0.266576	0.03485	0.334297	0.305534	0.319916	0.0143815	0.243532	0.0884602		84	0.25426	0.151019	0.202639	0.0516205	0.335158	0.18958	0.262369	0.072789
84.5	0.296825	0.227063	0.261944	0.034881	0.32724	0.301861	0.31455	0.0126895	0.239085	0.0873448		84.5	0.244772	0.144829	0.1948	0.0499715	0.326745	0.185365	0.256055	0.07069
85	0.2844	0.225892	0.255146	0.029254	0.319739	0.296057	0.307898	0.011841	0.233884	0.0856464		85	0.23419	0.137069	0.18563	0.0485605	0.319616	0.180413	0.250015	0.0696015
85.5	0.271903	0.224672	0.248287	0.0236155	0.312423	0.290903	0.301663	0.01076	0.228937	0.0841295		85.5	0.218639	0.131956	0.175297	0.0433415	0.310289	0.174507	0.242398	0.067891
86	0.262499	0.215677	0.239088	0.023411	0.306313	0.286922	0.296617	0.0096955	0.224887	0.0829533		86	0.212428	0.132765	0.172596	0.0398315	0.302405	0.169751	0.236078	0.066327
86.5	0.254954	0.206775	0.230865	0.0240895	0.298266	0.283589	0.290928	0.0073385	0.22003	0.0819382		86.5	0.202289	0.1385	0.170395	0.0318945	0.2935	0.165503	0.229501	0.0639985
87	0.247077	0.210833	0.228955	0.018122	0.292307	0.279238	0.285772	0.0065345	0.215963	0.0806679		87	0.190062	0.137178	0.16362	0.026442	0.284421	0.162218	0.22332	0.0611015
87.5	0.244011	0.219209	0.23161	0.012401	0.286871	0.274861	0.280866	0.006005	0.212151	0.079396		87.5	0.181963	0.138562	0.160263	0.0217005	0.275511	0.160147	0.217829	0.057682
88	0.240088	0.218092	0.22909	0.010998	0.281413	0.26936	0.275386	0.0060265	0.208046	0.0778094		88	0.169874	0.136485	0.153179	0.0166945	0.267083	0.156873	0.211978	0.055105
88.5	0.237165	0.207639	0.222402	0.014763	0.275764	0.263405	0.269585	0.0061795	0.203733	0.0760943		88.5	0.161615	0.13041	0.146012	0.0156025	0.256633	0.151908	0.20427	0.0523625
89	0.237471	0.200749	0.21911	0.018361	0.269398	0.260991	0.265194	0.0042035	0.199947	0.0753677		89	0.151965	0.128789	0.140377	0.011588	0.246467	0.14732	0.196893	0.0495735
89.5	0.236301	0.190065	0.213183	0.023118	0.262989	0.256136	0.259562	0.0034265	0.195528	0.0739577		89.5	0.141847	0.124178	0.133013	0.0088345	0.237159	0.143626	0.190393	0.0467665
90	0.233698	0.182794	0.208246	0.025452	0.258863	0.250659	0.254761	0.004102	0.192096	0.0723849		90	0.132508	0.113899	0.123203	0.0093045	0.230274	0.140005	0.18514	0.0451345
90.5	0.227875	0.177398	0.202636	0.0252385	0.253414	0.247106	0.25026	0.003154	0.188483	0.0713489		90.5	0.124095	0.107122	0.115609	0.0084865	0.220151	0.134497	0.177324	0.042827
91	0.223367	0.170631	0.196999	0.026368	0.247281	0.244324	0.245803	0.0014785	0.184721	0.0705337		91	0.118083	0.108447	0.113265	0.004818	0.211971	0.129529	0.17075	0.041221
91.5	0.216355	0.164304	0.190329	0.0260255	0.24131	0.239948	0.240629	0.000681	0.180642	0.0692678		91.5	0.114528	0.110685	0.112606	0.0019215	0.202745	0.125286	0.164016	0.0387295
92	0.208145	0.159032	0.183588	0.0245565	0.23715	0.234177	0.235663	0.0014865	0.177119	0.0676047		92	0.110366	0.112175	0.11127	0.0009045	0.196249	0.120374	0.158311	0.0379375
92.5	0.19997	0.159586	0.179778	0.020192	0.23272	0.228882	0.230801	0.001919	0.17358	0.0660787		92.5	0.107563	0.110131	0.108847	0.001284	0.190648	0.115789	0.153219	0.0374295
93	0.197827	0.164419	0.181123	0.016704	0.228078	0.222876	0.225477	0.002601	0.169758	0.0643504		93	0.105105	0.106295	0.1057	0.000595	0.1841	0.112976	0.148538	0.035562
93.5	0.199051	0.161196	0.180123	0.0189275	0.224634	0.21826	0.221447	0.003187	0.166882	0.0630241		93.5	0.101281	0.103961	0.102621	0.00134	0.17742	0.107619	0.142519	0.0349005
94	0.197258	0.160004	0.178631	0.018627	0.220237	0.21373	0.216983	0.0032535	0.163551	0.0617176		94	0.096485	0.099128	0.0978065	0.0013215	0.170294	0.103094	0.136694	0.0336
94.5	0.190298	0.154653	0.172476	0.0178225	0.214215	0.209276	0.211745	0.0024695	0.159426	0.060424		94.5	0.093287	0.095896	0.0945915	0.0013045	0.164516	0.098673	0.131595	0.0329215
95	0.182651	0.150148	0.1664	0.0162515	0.20833	0.204185	0.206257	0.0020725	0.155211	0.0589512		95	0.088157	0.095959	0.092058	0.003901	0.157282	0.096074	0.126678	0.030604
95.5	0.173877	0.145516	0.159697	0.0141805	0.201924	0.197542	0.199733	0.002191	0.150348	0.0570348		95.5	0.082488	0.090333	0.0864105	0.0039225	0.149289	0.09236	0.120825	0.0284645
96	0.163631	0.140068	0.151849	0.0117815	0.197445	0.192116	0.194781	0.0026645	0.146752	0.0554733		96	0.078315	0.087147	0.082731	0.004416	0.142573	0.088124	0.115348	0.0272245
96.5	0.155815	0.130634	0.143225	0.0125905	0.193658	0.186673	0.190165	0.0034925	0.143497	0.053913		96.5	0.075124	0.087415	0.0812695	0.0061455	0.135953	0.085148	0.11055	0.0254025
97	0.146589	0.12614	0.136364	0.0102245	0.187937	0.182702	0.185319	0.0026175	0.139644	0.052756		97	0.070323	0.080509	0.075416	0.005093	0.13056	0.082219	0.106389	0.0241705
97.5	0.139143	0.127054	0.133099	0.0060445	0.181336	0.178124	0.17973	0.001606	0.135199	0.0514255		97.5	0.067451	0.077482	0.0724665	0.0050155	0.123624	0.079377	0.1015	0.0221235
98	0.13488	0.126847	0.130863	0.0040165	0.175965	0.17207	0.174017	0.0019475	0.131	0.0496808		98	0.066123	0.077225	0.071674	0.005551	0.118745	0.077102	0.0979235	0.0208215
98.5	0.130725	0.124277	0.127501	0.003224	0.171257	0.166106	0.168681	0.0025755	0.127155	0.047966		98.5	0.064293	0.074781	0.069537	0.005244	0.11456	0.07353	0.094045	0.020515
99	0.124787	0.120102	0.122444	0.0023425	0.166845	0.161105	0.163975	0.00287	0.123699	0.0465267		99	0.059123	0.06636	0.0627415	0.0036185	0.108547	0.06987	0.0892085	0.0193385
99.5	0.120082	0.115706	0.117894	0.002188	0.161502	0.154936	0.158219	0.003283	0.119485	0.0447529		99.5	0.056003	0.063313	0.059658	0.003655	0.103635	0.065629	0.084632	0.019003
100	0.1148	0.11554	0.11517	0.00037	0.156597	0.150946	0.153772	0.0028255	0.116035	0.0435947		100	0.053169	0.060375	0.056772	0.003603	0.098103	0.062117	0.08011	0.017993

## Sheet: Figure S1E
		Average distance from cell centre (siglec-1 immobile fraction)
		cell 1	cell 2	cell 3	cell 4	cell 5	cell 6	cell 7	cell 8	cell 9	cell 10	average	SD
	control	130.293	84.3307	120.7	87.3145	113.292	92.7662	94.023	200.611			115.416	38.2446
	smifh2	118.184	121.105	142.758	102.281	108.588	105.586	155.139	109.035	114.76	118.6	119.604	16.8565
		Average distance from cell centre (siglec-1 mobile fraction)
		cell 1	cell 2	cell 3	cell 4	cell 5	cell 6	cell 7	cell 8	cell 9	cell 10	average	SD
	control	125.023	86.7182	92.3051	82.8678	103.97	92.5538	71.2686	186.646			105.169	36.5392
	smifh2	107.256	117.949	149.162	125.176	112.959	116.47	148.748	115.194	120.474	107.765	122.115	15.1313
	Table Analyzed (Two way ANOVA)
	Two-way RM ANOVA	Matching: Across row
	Assume sphericity?	Yes
	Alpha	0.05
	Source of Variation	% of total variation	P value	P value summary	Significant?
	Treatment x Distance from CM	1.411	0.0226	*	Yes
	Treatment	3.87	0.4211	ns	No
	Distance from CM	0.5185	0.1455	ns	No
	Paired mobile - immobile	90.83	<0,0001	****	Yes
	ANOVA table	SS	DF	MS	F (DFn, DFd)	P value
	Treatment x Distance from CM	361.7	1	361.7	F (1, 16) = 6,371	P=0,0226
	Treatment	992.5	1	992.5	F (1, 16) = 0,6817	P=0,4211
	Distance from CM	133	1	133	F (1, 16) = 2,342	P=0,1455
	Paired mobile - immobile	23294	16	1456	F (16, 16) = 25,64	P<0,0001
	Residual	908.5	16	56.78
	Difference between row means
	Mean of control	110.3
	Mean of smifh2	120.9
	Difference between means	-10.57
	SE of difference	12.8
	95% CI of difference	-37,70 to 16,56
	Difference between column means
	Mean of immobile	117.5
	Mean of mobile	113.6
	Difference between means	3.868
	SE of difference	2.527
	95% CI of difference	-1,490 to 9,226
	Interaction CI
	Mean diff, A1 - B1	10.25
	Mean diff, A2 - B2	-2.512
	(A1 -B1) - (A2 - B2)	12.76
	95% CI of difference	2,043 to 23,47
	(B1 - A1) - (B2 - A2)	-12.76
	95% CI of difference	-23,47 to -2,043
	Data summary
	Number of columns (Distance from CM)	2
	Number of rows (Treatment)	2
	Number of subjects (Paired mobile - immobile)	18
	Number of missing values	0
	Bonferroni multiple comparison
	Number of families	1
	Number of comparisons per family	2
	Alpha	0.05
	Bonferroni's multiple comparisons test	Predicted (LS) mean diff,	95,00% CI of diff,	Below threshold?	Summary	Adjusted P Value
	immobile - mobile
	control	10.25	0,9299 to 19,56	Yes	*	0.0303
	smifh2	-2.512	-10,85 to 5,822	No	ns	0.9338
	Test details	Predicted (LS) mean 1	Predicted (LS) mean 2	Predicted (LS) mean diff,	SE of diff,	N1	N2	t	DF
	immobile - mobile
	control	115.4	105.2	10.25	3.768	8	8	2.72	16
	smifh2	119.6	122.1	-2.512	3.37	10	10	0.7453	16

## Sheet: Figure S1C
Figure 2C	mDC
Nº of molecules per spot	Experiment 1	Experiment 2	average	SEM
1	0.4242	0.1702	0.2972	0.0898026
2	0.3235	0.5521	0.4378	0.0808223
3	0.1239	0.1084	0.11615	0.00548008
4	0.128666	0.1692	0.148933	0.0143309
Sample size	Values correspond to all siglec-1 spots analysed in 9 cells	Values correspond to all siglec-1 spots analysed in 10 cells
Figure 1B	mDC + CytoD
Nº of molecules per spot	Experiment 1	Experiment 2	average	SEM
1	0.646	0.3985	0.52225	0.12375
2	0.1971	0.4804	0.33875	0.14165
3	0.0934	0.0649	0.07915	0.01425
4	0.0635	0.056202	0.059851	0.003649
Sample size	Values correspond to all siglec-1 spots analysed in 10 cells	Values correspond to all siglec-1 spots analysed in 10 cells
Table Analyzed (Two way ANOVA)
Two-way RM ANOVA	Matching: Across row
Assume sphericity?	Yes
Alpha	0.05
Source of Variation	% of total variation	P value	P value summary	Significant?
Row Factor x Time	12.54	0.0007	***	Yes
Row Factor	64.01	0.1203	ns	No
Time	3.021e-07	0.9983	ns	No
Subject	23.21	0.0003	***	Yes
ANOVA table	SS	DF	MS	F (DFn, DFd)	P value
Row Factor x Time	0.06976	3	0.02325	F (3, 4) = 67,76	P=0,0007
Row Factor	0.3562	3	0.1187	F (3, 4) = 3,677	P=0,1203
Time	1.681e-09	1	1.681e-09	F (1, 4) = 4,898e-006	P=0,9983
Subject	0.1291	4	0.03229	F (4, 4) = 94,07	P=0,0003
Residual	0.001373	4	0.0003432
Difference between column means
Mean of mDC control	0.25
Mean of mDC CytoD	0.25
Difference between means	2.05e-05
SE of difference	0.009263
95% CI of difference	-0,02570 to 0,02574
Data summary
Number of columns (Time)	2
Number of rows (Row Factor)	4
Number of subjects (Subject)	8
Number of missing values	0
Bonferroni multiple comparison test
Number of families	1
Number of comparisons per family	4
Alpha	0.05
Bonferroni's multiple comparisons test	Mean Diff,	95,00% CI of diff,	Below threshold?	Summary	Adjusted P Value
mDC control - mDC CytoD
1	-0.2251	-0,3050 to -0,1451	Yes	**	0.0011
2	0.09905	0,01912 to 0,1790	Yes	*	0.0236
3	0.037	-0,04293 to 0,1169	No	ns	0.4659
4	0.08908	0,009150 to 0,1690	Yes	*	0.0344
Test details	Mean 1	Mean 2	Mean Diff,	SE of diff,	N1	N2	t	DF
mDC control - mDC CytoD
1	0.2972	0.5223	-0.2251	0.01853	2	2	12.15	4
2	0.4378	0.3388	0.09905	0.01853	2	2	5.347	4
3	0.1162	0.07915	0.037	0.01853	2	2	1.997	4
4	0.1489	0.05985	0.08908	0.01853	2	2	4.809	4

## Sheet: Figure S1I
		mDC (siglec-1 spots at the back)
	Nº of molecules per spot	Experiment 1	Experiment 2	average	SEM
	1	0.272171	0.408449	0.34031	0.0481815
	2	0.34834	0.342548	0.345444	0.00204778
	3	0.132621	0.109147	0.120884	0.00829931
	4	0.246868	0.139857	0.193362	0.0378341
	Sample size	Values correspond to all siglec-1 spots analysed in 14 cells	Values correspond to all siglec-1 spots analysed in 10 cells
		mDC + CytoD
	Nº of molecules per spot	Experiment 1	Experiment 2	average	SEM
	1	0.631488	0.544784	0.588136	0.0433522
	2	0.324364	0.333415	0.328889	0.00452571
	3	0.0453198	0.078405	0.0618624	0.0165426
	4	0.0309326	0.043214	0.0370733	0.00614068
	Sample size	Values correspond to all siglec-1 spots analysed in 14 cells	Values correspond to all siglec-1 spots analysed in 10 cells
	Table Analyzed (Two Way ANOVA)
	Two-way RM ANOVA	Matching: Across row
	Assume sphericity?	Yes
	Alpha	0.05
	Source of Variation	% of total variation	P value	P value summary	Significant?
	Row Factor x Time	18.03	0.0444	*	Yes
	Row Factor	77.98	0.0001	***	Yes
	Time	0.01283	0.9081	ns	No
	Subject	0.5807	0.9421	ns	No
	ANOVA table	SS	DF	MS	F (DFn, DFd)	P value
	Row Factor x Time	0.08954	3	0.02985	F (3, 4) = 7,088	P=0,0444
	Row Factor	0.3872	3	0.1291	F (3, 4) = 179,0	P=0,0001
	Time	6.369e-05	1	6.369e-05	F (1, 4) = 0,01512	P=0,9081
	Subject	0.002884	4	0.0007209	F (4, 4) = 0,1712	P=0,9421
	Residual	0.01684	4	0.004211
	Difference between column means
	Mean of Back	0.25
	Mean of Front	0.254
	Difference between means	-0.00399
	SE of difference	0.03244
	95% CI of difference	-0,09407 to 0,08609
	Data summary
	Number of columns (Time)	2
	Number of rows (Row Factor)	4
	Number of subjects (Subject)	8
	Number of missing values	0
	Bonferroni multiple comparison test
	Number of families	1
	Number of comparisons per family	4
	Alpha	0.05
	Bonferroni's multiple comparisons test	Mean Diff,	95,00% CI of diff,	Below threshold?	Summary	Adjusted P Value
	Back - Front
	1	-0.2478	-0,5278 to 0,03215	No	ns	0.0752
	2	0.01655	-0,2634 to 0,2965	No	ns	>0,9999
	3	0.05902	-0,2210 to 0,3390	No	ns	>0,9999
	>4	0.1563	-0,1237 to 0,4363	No	ns	0.2947
	Test details	Mean 1	Mean 2	Mean Diff,	SE of diff,	N1	N2	t	DF
	Back - Front
	1	0.3403	0.5881	-0.2478	0.06489	2	2	3.819	4
	2	0.3454	0.3289	0.01655	0.06489	2	2	0.2551	4
	3	0.1209	0.06186	0.05902	0.06489	2	2	0.9096	4
	>4	0.1934	0.03707	0.1563	0.06489	2	2	2.409	4
