# Supplementary material for: Actin-regulated Siglec-1 nanoclustering influences HIV-1 capture and virus-containing compartment formation in dendritic cells
Source: eLife journal article supplement (doi:10.7554/elife.78836), 2023-03-20
Supplement: fig3-data1 [file Figure 3-source data 1.xlsx]

## Sheet: Figure 3B
Experiment 1	mDC (Normalised siglec-1 intensity)													Experiment 1	iDC (Normalised siglec-1 intensity)
distance from cell base	cell 1	cell 2	cell 3	cell 4	cell 5	cell 6	cell 7	cell 8	cell 9	cell 10	average	SD		distance from cell base	cell 1	cell 2	cell 3	cell 4	cell 5	cell 6	cell 7	cell 8	cell 9	cell 10	cell 11	cell 12	cell 13	cell 14	cell 15	average	SD
1.5	2.1595						2.71788	1.97817			2.28518	0.385539		1.5	1.19399	2.12911	1.53138	1.73681	2.08034	1.66456	1.18013	1.00752	1.04918	1.38584	1.54803	1.06031	1.34425	1	1.19399	1.40703	0.368914
3	2.77521	2.40598	2.8736	1	2.31492	2.31492	3.63524	1.52392	1.19329	2.98824	2.30253	0.839318		3	1.11304	1.57725	1.22675	1.62967	1.99723	1.72262	1.48206	1	1.37881	1.32103	1.40485	1.40434	1.52064	1.53288	1.11304	1.42828	0.258198
4.5	3.02082	4.22087		4.38023	2.87595	2.87595	2.28153	1.45708	1.75287	2.59733	2.82918	0.986054		4.5	1.24911	1.6057	1.1818	1.53846	1.814	1.59384	2.0744	1.64507	1.40457	1.6256	1.40247	1.14958	1.26906	1.39098	1.24911	1.47958	0.255558
6	2.40652	2.32939	3.99176	4.67092	1.49032	1.49032	1.64829	1.43607	3.02087	1.82091	2.43054	1.13316		6	1.32073	1.6135	1.12605	1.57015	1.80895	1.35149	1.82943	1.4733	1.01227	1.76787	1.32926	1.25492	1.30286	1.21097	1.32073	1.4195	0.249671
7.5	1.36732	1.53895	1.73771	3.78898	1.3992	1.3992	1.35265	1.36207	2.53593	1.58317	1.80652	0.782919		7.5	1.46712	1.4109	1.04354	1.38196	1.68206	1.48654	1.30055	1.34651	1.10424	1.41968	1.41207	1.02336	1.15664	1.17809	1.46712	1.32536	0.187287
9	1.34597			2.3158	1.18561	1.18561	1.34207	1.23566	1.42918	1.37921	1.42739	0.370172		9	1.4019	1	1.06661	1.17537	1.46244	1.45559	1.304	1.21374	1	1.17043	1	1.05921	1	1.16558	1.4019	1.19179	0.174439
10.5	1.15644	2.07677	1.20511	1.78911	1.24442	1.24442	1.16069	1.11393	1.07236	1.24283	1.33061	0.32967		10.5	1.57748	1.40483	1	1.05119	1.0548	1.23134	1.28385	1.09839	1.16399	1		1		1.04545	1.57748	1.19145	0.210701
12	1	1	1	1.27846	1	1	1	1	1	1	1.02785	0.088058		12	1			1	1	1	1	1.00585							1	1.00084	0.00221034
Experiment 2	mDC (Normalised siglec-1 intensity)													Experiment 2	iDC (Normalised siglec-1 intensity)
distance from cell base	cell 1	cell 2	cell 3	cell 4	cell 5	cell 6	cell 7	cell 8	cell 9	cell 10	average	SD		distance from cell base	cell 1	cell 2	cell 3	cell 4	cell 5	cell 6	cell 7	cell 8	cell 9	cell 10	average	SD
1.5				2.23135					1.35231		1.79183	0.621574		1.5	1.01635		1.05096	1.26118	1.09954				1.27074		1.13976	0.118985
3	2.82103	2.44287	1.31374	2.62722	2.10936	1.76807	2.07717	1.38406	1.37836	1.58276	1.95047	0.549913		3	1.13373	1.52475	1.15339	1.50459	1.40016	1.27563	1.22097	1.04751	1.21657	1.15595	1.26332	0.162068
4.5	2.59078	2.97116		2.36122		1.96342	2.95911	1.18972	1.28011	1.66805	2.12294	0.707909		4.5	1.07592		1.14263	1.65682	1.27925	1.15064	1.27345	1.22835	1.32573	1.23439	1.26302	0.167158
6	1.79234		2.34037	2.09695	2.1423	1.69863	2.1368	1.12857	1.28684	1.5309	1.79485	0.419441		6	1.03694	1.63817	1.26002	1.85737	1.20261	1.13226		1.25198	1.50486		1.36053	0.279898
7.5	1.43742	2.85723	2.48021	1.74853	1.73702	1.46629		1.08159	1.35611	1.24935	1.71264	0.58923		7.5	1.05875	1.41189	1.59859	1.86238	1.12898		1.17539	1.40426	1.56815	1.62209	1.42561	0.265859
9	1.26736	1.96307		1.56793		1.3134	1.54537	1.10493	1.32553	1.13728	1.40311	0.281078		9	1.13241		1.37413	1.457	1	1.19814	1.05142	1.39223	1.38622	1.88681	1.31982	0.268594
10.5	1.31133	1.06077	1.48755	1.42809	1.58129	1.22291	1.41364		1.18211	1.08592	1.30818	0.182361		10.5	1	1.16119	1	1.27666		1.23299		1.30274	1.17088	1.68276	1.2284	0.215963
12			1.06948	1.13682	1.07234	1.05352	1.20945	1.12675	1.13992	1.09237	1.11258	0.05112		12		1.11333	1.02858	1.22678		1	1.00731	1.20154	1		1.0825	0.098414
13.5	1	1	1	1	1	1	1	1	1	1	1	0		13.5		1	1.02895	1		1.01708	1	1		1	1.00658	0.0117403
	mDC				iDC
distance from cell base	Experiment 1	Experiment 2	Average	SEM	Experiment 1	Experiment 2	Average	SEM
1.5	2.28518	1.79183	2.03851	0.246675	1.40703	1.13976	1.27339	0.133637
3	2.30253	1.95047	2.1265	0.176033	1.42828	1.26333	1.3458	0.082478
4.5	2.82918	2.12295	2.47606	0.353117	1.47958	1.26302	1.3713	0.108281
6	2.43054	1.79485	2.11269	0.317841	1.4195	1.36053	1.39001	0.029487
7.5	1.80652	1.71264	1.75958	0.0469415	1.32536	1.42561	1.37548	0.0501245
9	1.42739	1.40311	1.41525	0.01214	1.19179	1.31982	1.2558	0.064016
10.5	1.33061	1.30818	1.31939	0.011215	1.19145	1.2284	1.20992	0.018478
12	1.02785	1.11258	1.07021	0.042367	1.00083	1.0825	1.04167	0.0408345
Table Analyzed (Two Way ANOVA)
Two-way RM ANOVA	Matching: Across row
Assume sphericity?	Yes
Alpha	0.05
Source of Variation	% of total variation	P value	P value summary	Significant?
distance in z x iDC and mDC	17.11	0.0076	**	Yes
distance in z	38.2	0.0198	*	Yes
iDC and mDC	32.91	<0,0001	****	Yes
Subject	8.883	0.0667	ns	No
ANOVA table	SS	DF	MS	F (DFn, DFd)	P value
distance in z x iDC and mDC	1.068	7	0.1526	F (7, 8) = 6,755	P=0,0076
distance in z	2.386	7	0.3408	F (7, 8) = 4,915	P=0,0198
iDC and mDC	2.055	1	2.055	F (1, 8) = 90,97	P<0,0001
Subject	0.5547	8	0.06933	F (8, 8) = 3,069	P=0,0667
Residual	0.1807	8	0.02259
Difference between column means
Mean of mDC	1.79
Mean of iDC	1.283
Difference between means	0.5069
SE of difference	0.05314
95% CI of difference	0,3843 to 0,6294
Data summary
Number of columns (iDC and mDC)	2
Number of rows (distance in z)	8
Number of subjects (Subject)	16
Number of missing values	0
Bonferroni multiple comparison test
Number of families	1
Number of comparisons per family	8
Alpha	0.05
Bonferroni's multiple comparisons test	Mean Diff,	95,00% CI of diff,	Below threshold?	Summary	Adjusted P Value
mDC - iDC
Row 1	0.7651	0,2125 to 1,318	Yes	**	0.0075
Row 2	0.7807	0,2281 to 1,333	Yes	**	0.0066
Row 3	1.105	0,5522 to 1,657	Yes	***	0.0006
Row 4	0.7227	0,1701 to 1,275	Yes	*	0.0107
Row 5	0.3841	-0,1685 to 0,9367	No	ns	0.2711
Row 6	0.1594	-0,3932 to 0,7120	No	ns	>0,9999
Row 7	0.1095	-0,4431 to 0,6621	No	ns	>0,9999
Row 8	0.02854	-0,5241 to 0,5811	No	ns	>0,9999
Test details	Mean 1	Mean 2	Mean Diff,	SE of diff,	N1	N2	t	DF
mDC - iDC
Row 1	2.039	1.273	0.7651	0.1503	2	2	5.09	8
Row 2	2.126	1.346	0.7807	0.1503	2	2	5.194	8
Row 3	2.476	1.371	1.105	0.1503	2	2	7.35	8
Row 4	2.113	1.39	0.7227	0.1503	2	2	4.808	8
Row 5	1.76	1.375	0.3841	0.1503	2	2	2.555	8
Row 6	1.415	1.256	0.1594	0.1503	2	2	1.061	8
Row 7	1.319	1.21	0.1095	0.1503	2	2	0.7283	8
Row 8	1.07	1.042	0.02854	0.1503	2	2	0.1899	8

## Sheet: Figure 3C
Experiment 1	mDC (Normalised pERM intensity)													Experiment 1	iDC (Normalised pERM intensity)
distance from cell base	cell 1	cell 2	cell 3	cell 4	cell 5	cell 6	cell 7	cell 8	cell 9	cell 10	average	SD		distance from cell base	cell 1	cell 2	cell 3	cell 4	cell 5	cell 6	cell 7	cell 8	cell 9	cell 10	cell 11	cell 12	cell 13	cell 14	cell 15	average	SD
1.5	1.3068						1.12639	1.43518			1.28946	0.155123		1.5	1	1.06967	1.22805	1	2.09657	1.20913	1	1.18701	1.30752	1	1.18592	1.01285	1	1.02161	1.02645	1.15632	0.280557
3	1.86936	4.2183	1	1.71785	2.11547	2.11547	1.22322	1.56248	1.47904	2.95514	2.02563	0.943758		3	1.34814	1.41454	1	1.46471	1.31454	1.31917	1.2297	1.54602	1.53537	1.25652	1.08296	1.11686	1.10013	1.43344	1.03516	1.27982	0.180936
4.5	1.99325	5.0927		1.86401	3.07331	3.07331	1.52918	1.34901	1.31569	1.90328	2.35486	1.21846		4.5	1.49157	1.8683	1.41383	2.12669	1	1.91333	2.21136	2.1203	1.90018	1.52856	1.1327	1.17161	1.27943	1.67308	1.01215	1.58954	0.418125
6	2.07147	4.40644	2.39296	1.74454	2.21007	2.21007	1.51087	1.24039	1.56365	2.58712	2.19376	0.88694		6	1.5694	1.96517	1.45229	2.08248	1.31296	2.00365	2.34523	1.96434	1.36032	1.71418	1.14806	1.25503	1.35388	1.65182	1.03663	1.61436	0.386707
7.5	1.60428	2.21527	2.2431	1.36051	1.73628	1.73628	1.28962	1	1	2.18137	1.63667	0.474638		7.5	1.78048	4.50475	1.3817	1.64153	1.75954	2.01114	1.85059	1.83788	1.15693	1.77195	1.00354	1.07984	1.22489	1.51263	1	1.70116	0.846863
9	1.44306			1.16266	1.56894	1.56894	1	1.03588	1.26721	1.91967	1.3708	0.313668		9	1.60084	1	1.62611	1.35207	1.48361	1.67768	1.82588	1.7599	1.0667	1.74635	1	1	1.10001	1.29076	1.16721	1.37981	0.310507
10.5	1.28822	1.23313	3.27218	1.58587	1.24664	1.24664	1.07745	1.20433	1.20527	1.55391	1.49136	0.645278		10.5	1.48838	1.48931	1.45054	1.13017	1.62116	1.39001	1.79389	1.53708	1	1.53208		1.01296		1	1.35851	1.36954	0.256745
12	1	1	1.56888	1	1	1	1.22368	1.22498	1.26	1	1.12775	0.191097		12				1.06521	1.23759	1	1.49508	1							1.10922	1.15118	0.190051
Experiment 2	mDC (Normalised pERM intensity)													Experiment 2	iDC (Normalised pERM intensity)
distance from cell base	cell 1	cell 2	cell 3	cell 4	cell 5	cell 6	cell 7	cell 8	cell 9	cell 10	average	SD		distance from cell base	cell 1	cell 2	cell 3	cell 4	cell 5	cell 6	cell 7	cell 8	cell 9	cell 10	average	SD
1.5				1.45791					1.39738		1.42764	0.0428026		1.5	1.16193		1.93121	1.43754	1.00646				1.49855		1.40714	0.355179
3	1.9917	2.43227	2.52611	1.29096	3.47843	1.85265	2.98504	1.83375	1.22704	2.05814	2.16761	0.70646		3	1.18306	2.39223	2.17555	1.47251	1.14534	2.39955	2.53556	1.46708	1.38964	2.23382	1.83943	0.553837
4.5	1.48353	1.70826		1.14928		1.6178	3.18708	1.27683	1.04733	1.50301	1.62164	0.672216		4.5	1.26977		2.02344	1.1776	1	1.32811	1.25384	1.48243	1.32552	1.96868	1.42549	0.348482
6	1.54238		2.78154	1.20448	2.38209	1.54676	2.98675	1.14897	1.1108	1.371	1.78609	0.731173		6	1.54234	1.72802	1.7675	1.45966	1.02381	1.24546		1.86273	1.16302		1.47407	0.306656
7.5	1.33441	1.56785	2.11875	1.05315	1.88628	1.37985		1.14434	1.21175	1.29477	1.44346	0.353755		7.5	1.94992	1.51561	1.88814	1.44971	1.04934		1.209	2.02219	1.24525	1.88874	1.57977	0.366584
9	1.15305	1.2853		1.10179		1.27249	1.97983	1.17636	1.1984	1.19931	1.29582	0.282749		9	1.66142		1.87529	1.31848	1.17119	1.55341	1.02902	1.29013	1	2.14976	1.44986	0.391509
10.5	1.13309	1.10079	1.64328	1.02747	1.53549	1.16726	1.42028		1.02153	1.18095	1.24779	0.227593		10.5	1	1.46039	1.60486	1.19069		1.17094		1.39342	1.07966	2.25841	1.3948	0.403768
12			1	1.08607	1	1	1.13574	1.02298	1	1.04632	1.03639	0.0505872		12		1.2515	1	1.07483		1	1	1.15649	1.48503		1.13826	0.180175
13.5	1	1	1.02451	1	1.10004	1.01462	1	1	1.05255	1	1.01917	0.0331813		13.5		1	1.21026	1		1.04595	1.06769	1		1	1.04627	0.0773698
	mDC				iDC
distance from cell base	Experiment 1	Experiment 2	average	SEM	Experiment 1	Experiment 2	average	SEM
1.5	1.28946	1.42764	1.35855	0.069094	1.15632	1.40714	1.28173	0.125409
3	2.02563	2.16761	2.09662	0.070988	1.27982	1.83943	1.55963	0.279807
4.5	2.35486	1.62164	1.98825	0.366611	1.58954	1.42549	1.50751	0.0820255
6	2.19376	1.78609	1.98992	0.203836	1.61436	1.47407	1.54421	0.070147
7.5	1.63667	1.44346	1.54007	0.0966055	1.70116	1.57977	1.64046	0.060696
9	1.3708	1.29581	1.33331	0.0374905	1.37981	1.44986	1.41483	0.0350245
10.5	1.49137	1.24779	1.36958	0.121785	1.36955	1.3948	1.38217	0.0126255
12	1.12775	1.03639	1.08207	0.045683	1.15118	1.13827	1.14472	0.006459
Table Analyzed (Two way ANOVA)
Two-way RM ANOVA	Matching: Across row
Assume sphericity?	Yes
Alpha	0.05
Source of Variation	% of total variation	P value	P value summary	Significant?
distance x cell type	16.67	0.047	*	Yes
distance	56.91	0.0269	*	Yes
cell type	6.365	0.0148	*	Yes
pERM intensity and distance	14.74	0.0852	ns	No
ANOVA table	SS	DF	MS	F (DFn, DFd)	P value
distance x cell type	0.539	7	0.07701	F (7, 8) = 3,586	P=0,0470
distance	1.84	7	0.2628	F (7, 8) = 4,412	P=0,0269
cell type	0.2058	1	0.2058	F (1, 8) = 9,583	P=0,0148
pERM intensity and distance	0.4766	8	0.05958	F (8, 8) = 2,774	P=0,0852
Residual	0.1718	8	0.02147
Difference between column means
Mean of mDC	1.595
Mean of iDC	1.434
Difference between means	0.1604
SE of difference	0.05181
95% CI of difference	0,04091 to 0,2799
Data summary
Number of columns (cell type)	2
Number of rows (distance)	8
Number of subjects (pERM intensity and distance)	16
Number of missing values	0
Bonferroni multiple comparison test
Number of families	1
Number of comparisons per family	8
Alpha	0.05
Bonferroni's multiple comparisons test	Mean Diff,	95,00% CI of diff,	Below threshold?	Summary	Adjusted P Value
mDC - iDC
Row 1	0.07682	-0,4619 to 0,6156	No	ns	>0,9999
Row 2	0.537	-0,001768 to 1,076	No	ns	0.0509
Row 3	0.4807	-0,05803 to 1,020	No	ns	0.0894
Row 4	0.4457	-0,09306 to 0,9845	No	ns	0.1282
Row 5	-0.1004	-0,6392 to 0,4384	No	ns	>0,9999
Row 6	-0.08153	-0,6203 to 0,4572	No	ns	>0,9999
Row 7	-0.01259	-0,5514 to 0,5262	No	ns	>0,9999
Row 8	-0.06265	-0,6014 to 0,4761	No	ns	>0,9999
Test details	Mean 1	Mean 2	Mean Diff,	SE of diff,	N1	N2	t	DF
mDC - iDC
Row 1	1.359	1.282	0.07682	0.1465	2	2	0.5242	8
Row 2	2.097	1.56	0.537	0.1465	2	2	3.665	8
Row 3	1.988	1.508	0.4807	0.1465	2	2	3.281	8
Row 4	1.99	1.544	0.4457	0.1465	2	2	3.042	8
Row 5	1.54	1.64	-0.1004	0.1465	2	2	0.6851	8
Row 6	1.333	1.415	-0.08153	0.1465	2	2	0.5563	8
Row 7	1.37	1.382	-0.01259	0.1465	2	2	0.08592	8
Row 8	1.082	1.145	-0.06265	0.1465	2	2	0.4275	8

## Sheet: Figure 3G
Experiment 1	mDC (Normalised Siglec-1 intensity)																		Experiment 1	mDC + Y27623 (Normalised Siglec-1 intensity)
distance from cell base	cell 1	cell 2	cell 3	cell 4	cell 5	cell 6	cell 7	cell 8	cell 9	cell 10	average	SD							distance from cell base	cell 1	cell 2	cell 3	cell 4	cell 5	cell 6	cell 7	cell 8	cell 9	cell 10	cell 11	cell 12	average	SD
1.5	2.1595						2.71788	1.97817			2.28518	0.385539							1.5	1.46723	1.45975	1.92253	1.55153	1.76324	1.42704	1.99318	1.71736	1.30146	1.30376	1.73309	1.41136	1.58763	0.232955
3	2.77521	2.40598	2.8736	1	2.31492	2.31492	3.63524	1.52392	1.19329	2.98824	2.30253	0.839318							3	1.31278	1.44497	1.56116	1.28628	1.43509	1.47317	1.56681	1.58678	1.39612	1.52196	1.63146	1.16754	1.44868	0.138793
4.5	3.02082	4.22087	0	4.38023	2.87595	2.87595	2.28153	1.45708	1.75287	2.59733	2.54626	1.29023							4.5	1.33618	1.40848	1.32642	1.32304	1.66142	1.25638	1.51246	1.28112	1.26456	1.64852	1.5718	1.09103	1.39012	0.174548
6	2.40652	2.32939	3.99176	4.67092	1.49032	1.49032	1.64829	1.43607	3.02087	1.82091	2.43054	1.13316							6	1.13471	1.25723	1.30748	1.14322	1.39843	1.10824	1.24956	1.14462	1.10294	1.34876	1.37841	1	1.21447	0.126671
7.5	1.36732	1.53895	1.73771	3.78898	1.3992	1.3992	1.35265	1.36207	2.53593	1.58317	1.80652	0.782919							7.5	1	1	1.22365	1.11637	1.20802	1.02207	1.10979	1	1	1.16578	1.11429	1.01018	1.08084	0.086123
9	1.34597			2.3158	1.18561	1.18561	1.34207	1.23566	1.42918	1.37921	1.42739	0.370172							9		1.21533								1.19476	1	1.06284	1.11823	0.103814
10.5	1.15644	2.07677	1.20511	1.78911	1.24442	1.24442	1.16069	1.11393	1.07236	1.24283	1.33061	0.32967							10.5										1.06202			1.06202	#DIV/0!
12	1	1	1	1.27846	1	1	1	1	1	1	1.02785	0.088058							12										1			1	#DIV/0!
Experiment 2	mDC (Normalised Siglec-1 intensity)																		Experiment 2	mDC + Y27623 (Normalised Siglec-1 intensity)
distance from cell base	cell 1	cell 2	cell 3	cell 4	cell 5	cell 6	cell 7	cell 8	cell 9	cell 10	cell 11	cell 12	cell 13	cell 14	cell 15	average	SD		distance from cell base	cell 1	cell 2	cell 3	cell 4	cell 5	cell 6	cell 7	cell 8	cell 9	cell 10	cell 11	cell 12	cell 13	cell 14	cell 15	cell 16	cell 17	cell 18	cell 19	cell 20	cell 21	average	SD
1.5		2.02584	3.31869	6.4885	1.6407		2.53112	4.67181	3.14848	3.06799	7.19598		7.49979	3.50065		4.09905	2.07189		1.5	1.26318	1.85214	2.089	2.54489	1.51387	1	3.57356	1.22917	1.15966	1.65868	1.9609	1.35827	1.28639	2.01036	1.16957	1.72077	1.4286	1.34992	1.80137	1.42439	1.71197	1.67175	0.575726
3	2.14155	1.99228	3.40533	4.8611	1.23774	2.07479	3.67481	4.29028	5.70086	4.30558	5.43503	2.65392	5.69958	1.97835	3.25015	3.51342	1.48686		3	1.87685	1.75503	3.55378	1.44414	1.83512	1.68152	2.32857	1.40336	1.39626	2.02115	1.7085	1	2.23864	1.55377	1.5526	1.63856	1.8704	2.127	1.53835	1.21761	2.23158	1.80823	0.5276
4.5	2.27202	1.29844	3.23649	2.55448	1.18779	1.90773	2.0388	2.50902	2.72654	2.8218	2.89351	2.08012	1.97202	1.43737	1.38794	2.15494	0.636463		4.5	1.43688	1.41101	2.40029	1.17723	2.40355	1.56209	2.82795	1.25817	1.32734	1.95056	1.43186	1.07055	1.50754	1.47477	1.74035	1.52955	1.59006	1.51239	1.54711	1	1.72429	1.6135	0.452232
6	1.43085	1.09558	3.36633	1.84253	1.00851	2.92683	1.37155	1.44107	1.75496	2.02624	1.65638	2.30702	1.4357	1.45883	1.03805	1.74403	0.676645		6	1.09379	1.22773	1.92226	1.12877	1.30596	1.27106	1.97017	1	1.06415	1.44939	1.32023	1.28235	1.31914	1.35143	1.28721	1.08685	1.25246	1.67642	1.47739	1.24703	1.29464	1.33469	0.25343
7.5	1.4867	1	2.62145	1.88439	1	2.5947	1.07013	1.09966	1.4744	1.42032	1.52524		1.5429	1.46365	1.15762	1.52437	0.523944		7.5	1.08527	1	1.3708	1.10506	1	1.58766	1	1.07241	1	1	1		1.18831	1.01567	1	1.20747	1	1.64715	1.32509	1.03216	1.20274	1.14199	0.198487
9	1.19577	1.39215	2.45643	1.8453	1.49463	1.26762	1.03418	1.05212	1.37821	1.16663	1.2984	1.76945	1.49812	1.35356	1.67274	1.45835	0.365892		9	1	1.11586	1	1		1.64241							1		1.02131	1	1.05805	1.24859	1		1	1.09052	0.189117
10.5	1.33053	1.03552	2.14095	1.25215	2.21462	1.10272	1	1.05618	1.09765	1.12166	1.36731	2.62499	1.0858	1	1.04787	1.3652	0.519192		10.5																		1				1	#DIV/0!
12	1.18588		1.84103	1	2.09325	1	1.05887	1	1.07688	1	1	1.40947	1	1.08307	1	1.19632	0.348783		12																							#DIV/0!
	mDC			mDC + Y27623 (Normalised Siglec-1 intensity)
	Experiment 1	Experiment 2	average	SEM	Experiment 1	Experiment 2	average	SEM
1.5	2.28518	4.09905	3.19212	0.906934	1.58763	1.67175	1.62969	0.0420586
3	2.30253	3.51342	2.90798	0.605446	1.44868	1.80823	1.62845	0.179776
4.5	2.54626	2.15494	2.3506	0.195661	1.39012	1.6135	1.50181	0.111692
6	2.43054	1.74403	2.08728	0.343253	1.21447	1.33469	1.27458	0.0601109
7.5	1.80652	1.52437	1.66544	0.141075	1.08084	1.14199	1.11142	0.030573
9	1.42739	1.45835	1.44287	0.0154833	1.11823	1.09052	1.10438	0.0138565
10.5	1.33061	1.3652	1.3479	0.0172936	1.06202	1	1.03101	0.031009
12	1.02785	1.19632	1.11208	0.0842355	1		1
Table Analyzed (Two way ANOVA)
Two-way RM ANOVA	Matching: Across row
Assume sphericity?	Yes
Alpha	0.05
Source of Variation	% of total variation	P value	P value summary	Significant?
axial distance in z x Treatment	10.89	0.2529	ns	No
axial distance in z	45.06	0.0177	*	Yes
Treatment	26.35	0.0008	***	Yes
Subject	10.09	0.3503	ns	No
ANOVA table	SS	DF	MS	F (DFn, DFd)	P value
axial distance in z x Treatment	1.753	7	0.2504	F (7, 8) = 1,634	P=0,2529
axial distance in z	7.253	7	1.036	F (7, 8) = 5,105	P=0,0177
Treatment	4.241	1	4.241	F (1, 8) = 27,67	P=0,0008
Subject	1.624	8	0.203	F (8, 8) = 1,324	P=0,3503
Residual	1.226	8	0.1533
Difference between column means
Mean of mDC	2.013
Mean of mDC Y27632	1.285
Difference between means	0.7281
SE of difference	0.1384
95% CI of difference	0,4089 to 1,047
Data summary
Number of columns (Treatment)	2
Number of rows (axial distance in z)	8
Number of subjects (Subject)	16
Number of missing values	0
Bonferroni Multiple comparison test
Compare each cell mean with the other cell mean in that row
Number of families	1
Number of comparisons per family	8
Alpha	0.05
Bonferroni's multiple comparisons test	Mean Diff,	95,00% CI of diff,	Below threshold?	Summary	Adjusted P Value
mDC - mDC Y27632
Row 1	1.562	0,1231 to 3,002	Yes	*	0.032
Row 2	1.28	-0,1598 to 2,719	No	ns	0.0911
Row 3	0.8488	-0,5906 to 2,288	No	ns	0.496
Row 4	0.8127	-0,6266 to 2,252	No	ns	0.5725
Row 5	0.554	-0,8853 to 1,993	No	ns	>0,9999
Row 6	0.3385	-1,101 to 1,778	No	ns	>0,9999
Row 7	0.3169	-1,122 to 1,756	No	ns	>0,9999
Row 8	0.1121	-1,327 to 1,551	No	ns	>0,9999
Test details	Mean 1	Mean 2	Mean Diff,	SE of diff,	N1	N2	t	DF
mDC - mDC Y27632
Row 1	3.192	1.63	1.562	0.3915	2	2	3.991	8
Row 2	2.908	1.628	1.28	0.3915	2	2	3.268	8
Row 3	2.351	1.502	0.8488	0.3915	2	2	2.168	8
Row 4	2.087	1.275	0.8127	0.3915	2	2	2.076	8
Row 5	1.665	1.111	0.554	0.3915	2	2	1.415	8
Row 6	1.443	1.104	0.3385	0.3915	2	2	0.8646	8
Row 7	1.348	1.031	0.3169	0.3915	2	2	0.8095	8
Row 8	1.112	1	0.1121	0.3915	2	2	0.2863	8

## Sheet: Figure 3F
Experiment 1	mDC (Normalised Siglec-1 intensity)														Experiment 1	mDC + CT04 (Normalised Siglec-1 intensity)
distance from cell base	cell 1	cell 2	cell 3	cell 4	cell 5	cell 6	cell 7	cell 8	cell 9	cell 10	cell 11	average	SD		distance from cell base	cell 1	cell 2	cell 3	cell 4	cell 5	cell 6	cell 7	cell 8	cell 9	average	SD
1.5				1.26649						1.87311	1.87055	1.67005	0.349498		1.5	2.09482					1.58158	1.20048	1.68909	1.77591	1.66837	0.324155
3	2.19979	1.85684	1.47465	1.59617	1.93848	1.93664	2.11337	2.04953	1.7758	2.54972	1.79447	1.93504	0.295107		3	3.63107	1.74683	1.93736	1.27105	3.16406	1.70799	1.52104	1.31082	1.63025	1.99116	0.832199
4.5	5.02533	1.76685		1.80894	1.71527	3.52226	2.22107	2.06429	2.33785	3.12976	1.38126	2.49729	1.1053		4.5	2.55692	2.05237	1.41118	1.17014	2.25298	1.39321	1.32047	1.40416	1.54676	1.67869	0.48393
6	1.62556	1.3912	4.59395	1.71247	2.09751	2.77506		1.9662	1.6312	2.19507	1.26867	2.12569	0.970931		6	2.06157	1.81452	1.24944	1.02597	2.15539	1.18358	1.17362	1.23732	1.19742	1.45542	0.430207
7.5	1.42652	1.26554	2.54693	1.55543	1.97119	1.45172	1.79947	1.52025	1.48339	1.33945	1.10049	1.58731	0.396957		7.5	1.46365	1.21448	1.18779	1.14993	1.92017	1.00989	1.03786	1.15128	1.1006	1.24841	0.283862
9		1.08848		1.53133	1.63457		1.44066	1.27328	1.12535	1.09858	1.0238	1.27701	0.231092		9	1.08216	1.19545	1.10418	1	1.73923	1	1	1.04256	1.07669	1.13781	0.234263
10.5	1.16149	1	1.27613	1.45486	1.20486	1.1557		1	1	1	1	1.1253	0.155787		10.5	1	1	1		1.56867			1	1.09591	1.11076	0.227584
12	1	1.12982	1	1	1	1	1	1.01165	1.0222	1.00478		1.01685	0.0403698		12		1.01481							1	1.0074	0.0104715
Experiment 2	mDC (Normalised Siglec-1 intensity)														Experiment 2	mDC + CT04 (Normalised Siglec-1 intensity)
distance from cell base	cell 1	cell 2	cell 3	cell 4	cell 5	cell 6	cell 7	cell 8	cell 9	cell 10	average	SD			distance from cell base	cell 1	cell 2	cell 3	cell 4	cell 5	cell 6	cell 7	average	SD
1.5	1.61005	2.52558	2.66685		3.27495		1.63625	2.00625	1.32594	1.70526	2.09389	0.665641			1.5	1.05719	1.17149	1.36391	1.16657	2.09445		1.18741	1.34017	0.382495
3	4.32271	5.27622	5.13495	2.45757		1.9163	3.37445	6.50156	4.32268	6.05626	4.37363	1.55992			3	1	1.11095	1.80234	1.54157	1.49793	1.70587	1.81697	1.49652	0.325902
4.5	1.76582	1.81039	1.81039	6.15737	4.08768	5.44057	1.46313	2.03583	1.96825	2.00739	2.85468	1.71892			4.5	1.1255	1	2.32287	1.98678	1.15112	1.50981	1	1.4423	0.524852
6	1.29044	1.37975	1.37975	3.7897	2.4618	1.93787	1.70354	1.88357	1.37704	1.44961	1.86531	0.767686			6			1.90263	1.62735	1	1.20111	1.18746	1.38371	0.370041
7.5	1.06909	1.42205	1.42205	1.51353	2.69036	1	1.07928	1.16372	1.29322	1.1477	1.3801	0.491955			7.5			1.20671	1.03212	1.19759	1		1.10911	0.108302
9	1.4036	1.55848	1.55848	1.80678	1	1.01849	1.31969	1.27015	1.4314	1.19266	1.35597	0.251478			9			1	0.855316				0.927658	0.102307
10.5	1.16301	1.46099	1.46099	1.68076	1.24452	1.45905	1.56158	1.41429	1	1.09448	1.35397	0.218213			10.5
12	1	1	1	1.37096	1.53352	1.43158	1.25387	1	1.34508	1	1.1935	0.215411			12
	mDC			mDC + CT04
	Experiment 1	Experiment 2	average	SEM	Experiment 1	Experiment 2	average	SEM
1.5	1.67005	2.09389	1.88197	0.21192	1.66837	1.34017	1.50427	0.164101
3	1.93504	4.37363	3.15434	1.2193	1.99116	1.49652	1.74384	0.247323
4.5	2.49729	2.85468	2.67598	0.178697	1.67869	1.4423	1.56049	0.118196
6	2.12569	1.86531	1.9955	0.130191	1.45542	1.38371	1.41957	0.0358584
7.5	1.58731	1.3801	1.4837	0.103605	1.24841	1.10911	1.17876	0.0696493
9	1.27701	1.35597	1.31649	0.0394819	1.13781	0.927658	1.03273	0.105075
10.5	1.1253	1.35397	1.23964	0.114331	1.11076		1.11076
12	1.01685	1.1935	1.10517	0.088327	1.0074
Table Analyzed (Two way ANOVA)
Two-way RM ANOVA	Matching: Across row
Assume sphericity?	Yes
Alpha	0.05
Source of Variation	% of total variation	P value	P value summary	Significant?
axial distance x Treatment	10.77	0.6568	ns	No
axial distance	48.81	0.0046	**	Yes
Treatment	16.4	0.0238	*	Yes
Subject	7.08	0.8807	ns	No
ANOVA table	SS	DF	MS	F (DFn, DFd)	P value
axial distance x Treatment	1.556	7	0.2223	F (7, 8) = 0,7263	P=0,6568
axial distance	7.054	7	1.008	F (7, 8) = 7,878	P=0,0046
Treatment	2.37	1	2.37	F (1, 8) = 7,742	P=0,0238
Subject	1.023	8	0.1279	F (8, 8) = 0,4179	P=0,8807
Residual	2.449	8	0.3061
Difference between column means
Mean of mDC	1.857
Mean of mDC CT04	1.312
Difference between means	0.5443
SE of difference	0.1956
95% CI of difference	0,09319 to 0,9953
Data summary
Number of columns (Treatment)	2
Number of rows (axial distance)	8
Number of subjects (Subject)	16
Number of missing values	0
Bonferroni Multiple comparison test
Number of families	1
Number of comparisons per family	8
Alpha	0.05
Bonferroni's multiple comparisons test	Mean Diff,	95,00% CI of diff,	Below threshold?	Summary	Adjusted P Value
mDC - mDC CT04
Row 1	0.3777	-1,656 to 2,412	No	ns	>0,9999
Row 2	1.41	-0,6236 to 3,445	No	ns	0.2736
Row 3	1.115	-0,9186 to 3,150	No	ns	0.6281
Row 4	0.5759	-1,458 to 2,610	No	ns	>0,9999
Row 5	0.3049	-1,729 to 2,339	No	ns	>0,9999
Row 6	0.2838	-1,750 to 2,318	No	ns	>0,9999
Row 7	0.1843	-1,850 to 2,218	No	ns	>0,9999
Row 8	0.1015	-1,933 to 2,136	No	ns	>0,9999
Test details	Mean 1	Mean 2	Mean Diff,	SE of diff,	N1	N2	t	DF
mDC - mDC CT04
Row 1	1.882	1.504	0.3777	0.5533	2	2	0.6827	8
Row 2	3.154	1.744	1.41	0.5533	2	2	2.549	8
Row 3	2.676	1.56	1.115	0.5533	2	2	2.016	8
Row 4	1.995	1.42	0.5759	0.5533	2	2	1.041	8
Row 5	1.484	1.179	0.3049	0.5533	2	2	0.5512	8
Row 6	1.316	1.033	0.2838	0.5533	2	2	0.5129	8
Row 7	1.24	1.055	0.1843	0.5533	2	2	0.333	8
Row 8	1.105	1.004	0.1015	0.5533	2	2	0.1834	8

## Sheet: Figure 3H
Experiment 1	Average Voronoi areas per cell			Experiment 2	Average Voronoi areas per cell
cell nº	mDC	mDC + CT04		cell nº	mDC	mDC + CT04
cell 1	0.1491	0.2158		cell 1	0.15373	0.197842
cell 2	0.142	0.2016		cell 2	0.080819	0.149347
cell 3	0.1641	0.1314		cell 3	0.14334	0.181455
cell 4	0.1261	0.1787		cell 4	0.147856	0.229602
cell 5	0.1676	0.1493		cell 5	0.122116	0.137095
cell 6	0.0972	0.1816		cell 6	0.083069	0.162968
cell 7	0.1976	0.2745		cell 7	0.203009	0.131476
cell 8	0.08139	0.3263		cell 8	0.096983	0.156112
cell 9	0.08265	0.2471		cell 9	0.194798	0.182639
cell 10	0.1057	0.2471		cell 10	0.08034	0.184324
cell 11	0.08744	0.1903		cell 11	0.134179	0.154141
cell 12	0.1375	0.1426		cell 12	0.14275	0.194736
cell 13	0.1117	0.1611		cell 13	0.085748	0.149864
cell 14	0.1295	0.2313		cell 14	0.100998
cell 15	0.1553	0.1362		cell 15	0.111543
cell 16	0.1519	0.2064		average	0.125419	0.170123
cell 17	0.1689			SD	0.0394913	0.0278808
average	0.132687	0.201331
SD	0.0341454	0.0542982
Experiment 1 Mann-Whitney test				Experiment 1 Mann-Whitney test
Column B	CT04			Column B	CT04
vs.	vs,			vs.	vs,
Column A	mDC control			Column A	mDC control
Mann Whitney test				Mann Whitney test
P value	0.0002			P value	0.0026
Exact or approximate P value?	Exact			Exact or approximate P value?	Exact
P value summary	***			P value summary	**
Significantly different (P < 0.05)?	Yes			Significantly different (P < 0.05)?	Yes
One- or two-tailed P value?	Two-tailed			One- or two-tailed P value?	Two-tailed
Sum of ranks in column A,B	191 , 370			Sum of ranks in column A,B	154 , 252
Mann-Whitney U	38			Mann-Whitney U	34
Difference between medians				Difference between medians
Median of column A	0,1375, n=17			Median of column A	0,1221, n=15
Median of column B	0,1960, n=16			Median of column B	0,1630, n=13
Difference: Actual	0.05845			Difference: Actual	0.04085
Difference: Hodges-Lehmann	0.0638			Difference: Hodges-Lehmann	0.04846

## Sheet: Figure 3I
Experiment 1	Average Voronoi areas per cell			Experiment 2	Average Voronoi areas per cell
cell nº	mDC	mDC + Y27623		cell nº	mDC	mDC + Y27623
cell 1	0.172881	0.049884		cell 1	0.069218	0.145115
cell 2	0.077673	0.169727		cell 2	0.049947	0.179811
cell 3	0.065515	0.11589		cell 3	0.102171	0.160847
cell 4	0.089946	0.14561		cell 4	0.059952	0.122749
cell 5	0.082706	0.095966		cell 5	0.090693	0.199393
cell 6	0.132156	0.303885		cell 6	0.054332	0.186232
cell 7	0.103962	0.127165		cell 7	0.073318	0.151612
cell 8	0.112852	0.239332		cell 8	0.0926	0.104295
cell 9	0.171414	0.366081		cell 9	0.082779	0.167557
cell 10	0.092066	0.214513		cell 10	0.130395	0.19921
cell 11	0.132098	0.262314		cell 11	0.006894	0.129905
cell 12	0.080276	0.300909		cell 12	0.061516	0.145782
cell 13		0.167037		cell 13	0.06504	0.163246
cell 14		0.124592		cell 14	0.083652	0.145877
average	0.109462	0.191636		cell 15		0.166631
SD	0.0358307	0.0918208		cell 16		0.146456
				average	0.0730362	0.15717
				SD	0.0286642	0.0263658
Experiment 1 Mann-Whitney test				Experiment 1 Mann-Whitney test
Column B	Y27623 siglec-1			Column B	Y27623 siglec-1
vs.	vs,			vs.	vs,
Column A	Control siglec-1			Column A	Control siglec-1
Mann Whitney test				Mann Whitney test
P value	0.0127			P value	<0,0001
Exact or approximate P value?	Exact			Exact or approximate P value?	Exact
P value summary	*			P value summary	****
Significantly different (P < 0.05)?	Yes			Significantly different (P < 0.05)?	Yes
One- or two-tailed P value?	Two-tailed			One- or two-tailed P value?	Two-tailed
Sum of ranks in column A,B	114 , 237			Sum of ranks in column A,B	108 , 357
Mann-Whitney U	36			Mann-Whitney U	3
Difference between medians				Difference between medians
Median of column A	0,09801, n=12			Median of column A	0,07127, n=14
Median of column B	0,1684, n=14			Median of column B	0,1562, n=16
Difference: Actual	0.07037			Difference: Actual	0.08496
Difference: Hodges-Lehmann	0.06611			Difference: Hodges-Lehmann	0.08398

## Sheet: Figure 3J
	mDC						mDC + CT04
Nº of molecules per spot	Experiment 1	Experiment 2	AVERAGE	SEM		Nº of molecules per spot	Experiment 1	Experiment 2	AVERAGE	SEM
1	0.30868	0.397111	0.352896	0.0442155		1	0.536406	0.561604	0.549005	0.0178177
2	0.408769	0.470757	0.439763	0.030994		2	0.337218	0.396598	0.366908	0.041988
3	0.142172	0.003384	0.072778	0.069394		3	0.063507	0.006415	0.034961	0.0403701
4	0.140379	0.128748	0.134564	0.0058155		4	0.06287	0.035383	0.0491265	0.0194362
Sample size	all siglec-1 spots from 10 cells	all siglec-1 spots from 15 cells				Sample size	all siglec-1 spots from 11 cells	all siglec-1 spots from 13 cells
Table Analyzed (TWO-WAY ANOVA
Two-way RM ANOVA	Matching: Across row
Assume sphericity?	Yes
Alpha	0.05
Source of Variation	% of total variation	P value	P value summary	Significant?
Row Factor x Time	9.026	0.0045	**	Yes
Row Factor	87.6	0.0019	**	Yes
Time	1.075e-11	>0,9999	ns	No
Subject	2.903	0.0528	ns	No
ANOVA table	SS	DF	MS	F (DFn, DFd)	P value
Row Factor x Time	0.0525	3	0.0175	F (3, 4) = 25,61	P=0,0045
Row Factor	0.5095	3	0.1698	F (3, 4) = 40,23	P=0,0019
Time	6.25e-14	1	6.25e-14	F (1, 4) = 9,148e-011	P>0,9999
Subject	0.01689	4	0.004221	F (4, 4) = 6,179	P=0,0528
Residual	0.002733	4	0.0006832
Difference between column means
Mean of Control siglec-1	0.25
Mean of siglec-1 ct04	0.25
Difference between means	-1.25e-07
SE of difference	0.01307
95% CI of difference	-0,03629 to 0,03628
Data summary
Number of columns (Time)	2
Number of rows (Row Factor)	4
Number of subjects (Subject)	8
Number of missing values	0
Table Analyzed (Bonferroni post-test)
Compare each cell mean with the other cell mean in that row
Number of families	1
Number of comparisons per family	4
Alpha	0.05
Bonferroni's multiple comparisons test	Mean Diff,	95,00% CI of diff,	Below threshold?	Summary	Adjusted P Value
Control siglec-1 - siglec-1 ct04
1	-0.1961	-0,3089 to -0,08333	Yes	**	0.0068
2	0.07286	-0,03992 to 0,1856	No	ns	0.1978
3	0.03782	-0,07496 to 0,1506	No	ns	0.886
4	0.08544	-0,02734 to 0,1982	No	ns	0.1233
Test details	Mean 1	Mean 2	Mean Diff,	SE of diff,	N1	N2	t	DF
Control siglec-1 - siglec-1 ct04
1	0.3529	0.549	-0.1961	0.02614	2	2	7.503	4
2	0.4398	0.3669	0.07286	0.02614	2	2	2.787	4
3	0.07278	0.03496	0.03782	0.02614	2	2	1.447	4
4	0.1346	0.04913	0.08544	0.02614	2	2	3.269	4

## Sheet: Figure 3K
	mDC						mDC + CT04
Nº of molecules per spot	Experiment 1	Experiment 2	AVERAGE	SEM		Nº of molecules per spot	Experiment 1	Experiment 2	AVERAGE	SEM
1	0.335069	0.390992	0.363031	0.0279615		1	0.655091	0.591216	0.623153	0.0451664
2	0.39066	0.450581	0.420621	0.0299605		2	0.260473	0.330245	0.295359	0.0493363
3	0.131199	0.017214	0.0742065	0.0569925		3	0.047039	0.017312	0.0321755	0.0210202
4	0.143073	0.141213	0.142143	0.00093		4	0.057284	0.061228	0.059256	0.00278883
Sample size	all siglec-1 spots from 12 cells	all siglec-1 spots from 12 cells				Sample size	all siglec-1 spots from 9 cells	all siglec-1 spots from 16 cells
Table Analyzed (TWO-WAY ANOVA
Two-way RM ANOVA	Matching: Across row
Assume sphericity?	Yes
Alpha	0.05
Source of Variation	% of total variation	P value	P value summary	Significant?
Row Factor x Time	14.51	0.0057	**	Yes
Row Factor	83.16	0.0006	***	Yes
Time	0.0039	0.8989	ns	No
Subject	1.481	0.3025	ns	No
ANOVA table	SS	DF	MS	F (DFn, DFd)	P value
Row Factor x Time	0.09197	3	0.03066	F (3, 4) = 22,73	P=0,0057
Row Factor	0.5271	3	0.1757	F (3, 4) = 74,88	P=0,0006
Time	2.472e-05	1	2.472e-05	F (1, 4) = 0,01833	P=0,8989
Subject	0.009385	4	0.002346	F (4, 4) = 1,739	P=0,3025
Residual	0.005395	4	0.001349
Difference between column means
Mean of Control siglec-1	0.25
Mean of siglec-1 y-27	0.2525
Difference between means	-0.002486
SE of difference	0.01836
95% CI of difference	-0,05347 to 0,04850
Data summary
Number of columns (Time)	2
Number of rows (Row Factor)	4
Number of subjects (Subject)	8
Number of missing values	0
Table Analyzed (Bonferroni post-test)
Compare each cell mean with the other cell mean in that row
Number of families	1
Number of comparisons per family	4
Alpha	0.05
Bonferroni's multiple comparisons test	Mean Diff,	95,00% CI of diff,	Below threshold?	Summary	Adjusted P Value
Control siglec-1 - siglec-1 y-27
1	-0.2601	-0,4186 to -0,1017	Yes	**	0.0084
2	0.1253	-0,03320 to 0,2837	No	ns	0.108
3	0.04203	-0,1164 to 0,2005	No	ns	>0,9999
4	0.08289	-0,07558 to 0,2414	No	ns	0.3479
Test details	Mean 1	Mean 2	Mean Diff,	SE of diff,	N1	N2	t	DF
Control siglec-1 - siglec-1 y-27
1	0.363	0.6232	-0.2601	0.03673	2	2	7.083	4
2	0.4206	0.2954	0.1253	0.03673	2	2	3.411	4
3	0.07421	0.03218	0.04203	0.03673	2	2	1.144	4
4	0.1421	0.05926	0.08289	0.03673	2	2	2.257	4
