# Supplementary material for: Actin-regulated Siglec-1 nanoclustering influences HIV-1 capture and virus-containing compartment formation in dendritic cells
Source: eLife journal article supplement (doi:10.7554/elife.78836), 2023-03-20
Supplement: fig3-figsupp1-data1 [file elife-78836-fig3-figsupp1-data1-v2.zip]

## Sheet: Figure S1A
	Experiment 1	iDC	mDC		Experiment 2	iDC	mDC
	1	20.7602	26.9605		1	19.9628	23.4529
	2	17.5266	11.6239		2	23.6454	30.7529
	3	18.6287	31.7997		3	17.4665	27.9573
	4	16.5973	20.3042		4	21.2697	22.0452
	5	15.0694	24.0999		5	16.5403	30.1824
	6	15.9605	21.5603		6	22.3707	23.6044
	7	16.3899	22.3928		7	26.9568	36.5954
	8	15.4004	15.3715		8	17.2462	21.1404
	9	16.7817	20.2157		9	19.7564	21.332
	10	10.7065			10	21.8397	22.8257
	11	11.0608			average	20.7055	25.9889
	12	15.7826			SD	3.22076	5.15885
	13	14.1612
	14	11.2806
	average	15.4362	21.5921
	SD	2.88118	5.93255
	Table Analyzed (Mann-Whitney test)				Table Analyzed (Mann-Whitney test)
	Column B	Mdc CONTROL			Column B	Mdc CONTROL
	vs.	vs,			vs.	vs,
	Column A	Idc control			Column A	Idc control
	Mann Whitney test				Mann Whitney test
	P value	0.0086			P value	0.0147
	Exact or approximate P value?	Exact			Exact or approximate P value?	Exact
	P value summary	**			P value summary	*
	Significantly different (P < 0.05)?	Yes			Significantly different (P < 0.05)?	Yes
	One- or two-tailed P value?	Two-tailed			One- or two-tailed P value?	Two-tailed
	Sum of ranks in column A,B	127 , 149			Sum of ranks in column A,B	73 , 137
	Mann-Whitney U	22			Mann-Whitney U	18
	Difference between medians				Difference between medians
	Median of column A	15,87, n=14			Median of column A	20,62, n=10
	Median of column B	21,56, n=9			Median of column B	23,53, n=10
	Difference: Actual	5.689			Difference: Actual	2.912
	Difference: Hodges-Lehmann	5.899			Difference: Hodges-Lehmann	4.445

## Sheet: Figure S1B
	Experiment 1	mDC	mDC + CT04		Experiment 2	mDC	mDC + CT04
	1	16.3888	1.03862		1	6.16224	7.40745
	2	12.6754	0.791535		2	17.2669	4.56537
	3	21.3019	0.409572		3	15.7868	8.58582
	4	23.0248	0.711241		4	20.4529	2.60703
	5	7.88891	0.710817		5	46.0857	2.10448
	6	9.13203	0.783395		6	13.8348	3.99227
	7	6.989	0.714037		7	24.1558	13.0561
	8	9.63086	0.567748		8	14.6117
	9	14.6398	12,72101879*		9	19.3144
	10	14.5829	0.224759		10	15.2712
	11		1.86727		average	19.2942	6.0455
	average	13.6254	0.781899		SD	10.5385	3.89909
	SD	5.48593	0.441409
					Table Analyzed (Mann-Whitney test)
	Table Analyzed (Mann-Whitney test)
					Column B	mDC CT04
	Column B	mDC CT04			vs.	vs,
	vs.	vs,			Column A	mDC control
	Column A	mDC control
					Mann Whitney test
	Mann Whitney test				P value	0.0007
	P value	<0,0001			Exact or approximate P value?	Exact
	Exact or approximate P value?	Exact			P value summary	***
	P value summary	****			Significantly different (P < 0.05)?	Yes
	Significantly different (P < 0.05)?	Yes			One- or two-tailed P value?	Two-tailed
	One- or two-tailed P value?	Two-tailed			Sum of ranks in column A,B	122 , 31
	Sum of ranks in column A,B	155 , 55			Mann-Whitney U	3
	Mann-Whitney U	0
					Difference between medians
	Difference between medians				Median of column A	16,53, n=10
	Median of column A	13,63, n=10			Median of column B	4,565, n=7
	Median of column B	0,7126, n=10			Difference: Actual	-11.96
	Difference: Actual	-12.92			Difference: Hodges-Lehmann	-11.76
	Difference: Hodges-Lehmann	-12.58

## Sheet: Figure S1C
	Experiment 1	mDC	mDC + Y-27623		Experiment 2	mDC	mDC + Y-27623
	1	15.2133	13.4916		1	26.9605	15.8855
	2	15.8137	10.4446		2	19.0033	18.2989
	3	24.2144	11.8601		3	31.7997	28.418
	4	22.1186	9.17475		4	20.3042	21.3806
	5	22.1186	11.0821		5	24.0999	14.5638
	6	17.8619	10.2927		6	21.5603	20.3283
	7	10.3729	7.22386		7	22.3928	20.2626
	8	16.1598	11.5505		8	17.0074	13.934
	9	21.2076	16.2356		9	20.2157	20.9618
	10	10.0732	8.12291		10	20.8568	15.0515
	11	12.5756	9.76827		11		20.9558
	12	14.226	9.11132		12		16.0051
	13	18.8006	12.4944		13		23.1881
	14	8.2243	9.71465		average	22.4201	19.1718
	15	9.32402	12.0257		SD	4.28053	4.10944
	16	10.1072	8.15334
	17		9.53331		Table Analyzed (Mann-Whitney test)
	18		10.327
	19		8.26924		Column B	mDC Y-27
	20		9.5665		vs.	vs,
	21		6.14415		Column A	mDC control
	22		14.803
	average	15.5257	10.4268		Mann Whitney test
	SD	5.15932	2.41426		P value	0.1151
					Exact or approximate P value?	Exact
	Table Analyzed (Mann-Whitney test)				P value summary	ns
					Significantly different (P < 0.05)?	No
	Column B	mDC Y-276322			One- or two-tailed P value?	Two-tailed
	vs.	vs,			Sum of ranks in column A,B	146 , 130
	Column A	mDC control			Mann-Whitney U	39
	Mann Whitney test				Difference between medians
	P value	0.0016			Median of column A	21,21, n=10
	Exact or approximate P value?	Exact			Median of column B	20,26, n=13
	P value summary	**			Difference: Actual	-0.946
	Significantly different (P < 0.05)?	Yes			Difference: Hodges-Lehmann	-3.128
	One- or two-tailed P value?	Two-tailed
	Sum of ranks in column A,B	416 , 325
	Mann-Whitney U	72
	Difference between medians
	Median of column A	15,51, n=16
	Median of column B	10,03, n=22
	Difference: Actual	-5.483
	Difference: Hodges-Lehmann	-4.946

## Sheet: Figure S1E
	Experiment 1	iDC	iDC + CN03		Experiment 2	iDC	iDC + CN03
	1	29.3304	27.0904		1	21.0865	25.3539
	2	19.4239	59.9215		2	26.9479	29.5996
	3	20.3979	29.947		3	19.576	21.0254
	4	19.754	39.3815		4	24.1512	28.6153
	5	21.2682	30.3764		5	21.6216	26.2157
	6	30.1488	28.464		6	26.0288	26.4435
	7	22.8788	33.2677		7	22.296	27.6273
	8	22.3964	50.2909		8	23.1849	29.958
	9	18.8739	49.9483		9	25.686	28.0058
	10	19.4587	31.3222		10	22.6124	29.6455
	11		38.7652		11		29.6055
	12		51.2655		12		31.1187
	13		38.563		13		40.1618
	14		23.6124		14		25.2858
	15		26.8249		15		26.668
	16		38.709		16		22.7817
	17		32.0334		17		21.6758
	18		40.5678		18		22.9093
	19		32.5092		average	23.3191	27.372
	20		29.2115		SD	2.36281	4.38089
	21		28.4869
	22		28.2028		Table Analyzed (Mann-Whitney test)
	23		35.0987
	24		24.0301		Column B	iDC CN03
	average	22.3931	35.3288		vs.	vs,
	SD	4.08977	9.44975		Column A	iDC control
	Table Analyzed (Mann-Whitney test)				Mann Whitney test
					P value	0.0072
	Column B	iDC CN03			Exact or approximate P value?	Exact
	vs.	vs,			P value summary	**
	Column A	iDC control			Significantly different (P < 0.05)?	Yes
					One- or two-tailed P value?	Two-tailed
	Mann Whitney test				Sum of ranks in column A,B	90 , 316
	P value	<0,0001			Mann-Whitney U	35
	Exact or approximate P value?	Exact
	P value summary	****			Difference between medians
	Significantly different (P < 0.05)?	Yes			Median of column A	22,90, n=10
	One- or two-tailed P value?	Two-tailed			Median of column B	27,15, n=18
	Sum of ranks in column A,B	72 , 523			Difference: Actual	4.249
	Mann-Whitney U	17			Difference: Hodges-Lehmann	3.843
	Difference between medians
	Median of column A	20,83, n=10
	Median of column B	32,27, n=24
	Difference: Actual	11.44
	Difference: Hodges-Lehmann	10.45

## Sheet: Figure S1F
		iDC Control				iDC + CN03
	Distance from cell base	Experiment 1	Experiment 2	Average	SEM	Distance from cell base	Experiment 1	Experiment 2	Average	SEM
	1.5	1.44212	1.34331	1.39271	0.049405	1.5	1.44212	1.34331	1.39271	0.049405
	3	1.9506	1.45375	1.70218	0.248423	3	1.9506	1.45375	1.70218	0.248423
	4.5	1.77386	1.35591	1.56488	0.208972	4.5	1.77386	1.35591	1.56488	0.208972
	6	1.40866	1.40699	1.40783	0.0008305	6	1.40866	1.40699	1.40783	0.0008305
	7.5	1.26233	1.45881	1.36057	0.098243	7.5	1.26233	1.45881	1.36057	0.098243
	9					9	1.21991	1.30882	1.26437	0.0444545
	10.5					10.5	1.16334	1.22662	1.19498	0.031643
	12					12	1.17792	1.14729	1.16261	0.015318
	Number of cells analysed	average 10 cells analysed	average 10 cells analysed				average 24 cells analysed	average 17 cells analysed
	Table Analyzed (Two way ANOVA)
	Two-way RM ANOVA	Matching: Across row
	Assume sphericity?	Yes
	Alpha	0.05
	Source of Variation	% of total variation	P value	P value summary	Significant?
	distance in z x iDC and mDC	2.612	0.8197	ns	No
	distance in z	21.32	0.5011	ns	No
	iDC and mDC	39.61	0.0051	**	Yes
	Subject	27.7	0.1159	ns	No
	ANOVA table	SS	DF	MS	F (DFn, DFd)	P value
	distance in z x iDC and mDC	0.02269	4	0.005673	F (4, 5) = 0,3730	P=0,8197
	distance in z	0.1852	4	0.0463	F (4, 5) = 0,9619	P=0,5011
	iDC and mDC	0.3442	1	0.3442	F (1, 5) = 22,63	P=0,0051
	Subject	0.2407	5	0.04814	F (5, 5) = 3,165	P=0,1159
	Residual	0.07604	5	0.01521
	Difference between column means
	Mean of iDC siglec-1 CN03	1.486
	Mean of iDC siglec-1	1.223
	Difference between means	0.2624
	SE of difference	0.05515
	95% CI of difference	0,1206 to 0,4041
	Data summary
	Number of columns (iDC and mDC)	2
	Number of rows (distance in z)	5
	Number of subjects (Subject)	10
	Number of missing values	0
	Bonferroni multiple comparison test
	Number of families	1
	Number of comparisons per family	5
	Alpha	0.05
	Bonferroni's multiple comparisons test	Mean Diff,	95,00% CI of diff,	Below threshold?	Summary	Adjusted P Value
	iDC siglec-1 CN03 - iDC siglec-1
	Row 1	0.2024	-0,2949 to 0,6996	No	ns	0.8086
	Row 2	0.3719	-0,1254 to 0,8691	No	ns	0.1478
	Row 3	0.3105	-0,1868 to 0,8077	No	ns	0.2667
	Row 4	0.2106	-0,2866 to 0,7079	No	ns	0.7417
	Row 5	0.2165	-0,2808 to 0,7137	No	ns	0.6979
	Test details	Mean 1	Mean 2	Mean Diff,	SE of diff,	N1	N2	t	DF
	iDC siglec-1 CN03 - iDC siglec-1
	Row 1	1.393	1.19	0.2024	0.1233	2	2	1.641	5
	Row 2	1.702	1.33	0.3719	0.1233	2	2	3.016	5
	Row 3	1.565	1.254	0.3105	0.1233	2	2	2.517	5
	Row 4	1.408	1.197	0.2106	0.1233	2	2	1.708	5
	Row 5	1.361	1.144	0.2165	0.1233	2	2	1.755	5

## Sheet: Figure S1G
		iDC Control				iDC + CN03
	Distance from cell base	Experiment 1	Experiment 2	Average	SEM	Distance from cell base	Experiment 1	Experiment 2	Average	SEM
	1.5	1.15418	1.14902	1.1516	0.0025795	1.5	1.66981	1.75406	1.71193	0.042129
	3	1.3635	1.29897	1.33123	0.032262	3	1.81118	1.77989	1.79553	0.0156445
	4.5	1.41058	1.25564	1.33311	0.0774705	4.5	1.81704	1.49082	1.65393	0.163108
	6	1.20947	1.18259	1.19603	0.0134365	6	1.57314	1.51608	1.54461	0.0285255
	7.5	1.08823	1.07924	1.08373	0.004497	7.5	1.47709	1.39566	1.43638	0.0407145
	9	1.0209				9	1.42898	1.18071	1.30485	0.124136
	10.5					10.5	1.2513	1.22624	1.23877	0.012527
	12					12	1.24982	1.1241	1.18696	0.062861
	Number of cells analysed	average 10 cells analysed	average 10 cells analysed				average 24 cells analysed	average 19 cells analysed
	Table Analyzed (Two way ANOVA)
	Two-way RM ANOVA	Matching: Across row
	Assume sphericity?	Yes
	Alpha	0.05
	Source of Variation	% of total variation	P value	P value summary	Significant?
	distance in z x iDC and mDC	3.463	0.0639	ns	No
	distance in z	18.47	0.0761	ns	No
	iDC and mDC	71.52	<0,0001	****	Yes
	Subject	5.595	0.0371	*	Yes
	ANOVA table	SS	DF	MS	F (DFn, DFd)	P value
	distance in z x iDC and mDC	0.04056	4	0.01014	F (4, 5) = 4,548	P=0,0639
	distance in z	0.2163	4	0.05408	F (4, 5) = 4,126	P=0,0761
	iDC and mDC	0.8378	1	0.8378	F (1, 5) = 375,7	P<0,0001
	Subject	0.06554	5	0.01311	F (5, 5) = 5,879	P=0,0371
	Residual	0.01115	5	0.00223
	Difference between column means
	Mean of iDC control pERM	1.219
	Mean of iDC CN03 pERM	1.628
	Difference between means	-0.4093
	SE of difference	0.02112
	95% CI of difference	-0,4636 to -0,3551
	Data summary
	Number of columns (iDC and mDC)	2
	Number of rows (distance in z)	5
	Number of subjects (Subject)	10
	Number of missing values	0
	Bonferroni multiple comparison test
	Number of families	1
	Number of comparisons per family	5
	Alpha	0.05
	Bonferroni's multiple comparisons test	Mean Diff,	95,00% CI of diff,	Below threshold?	Summary	Adjusted P Value
	iDC control pERM - iDC CN03 pERM
	Row 1	-0.5603	-0,7507 to -0,3699	Yes	***	0.0004
	Row 2	-0.4643	-0,6547 to -0,2739	Yes	***	0.0009
	Row 3	-0.3208	-0,5112 to -0,1304	Yes	**	0.0053
	Row 4	-0.3486	-0,5390 to -0,1582	Yes	**	0.0036
	Row 5	-0.3526	-0,5430 to -0,1622	Yes	**	0.0034
	Test details	Mean 1	Mean 2	Mean Diff,	SE of diff,	N1	N2	t	DF
	iDC control pERM - iDC CN03 pERM
	Row 1	1.152	1.712	-0.5603	0.04722	2	2	11.87	5
	Row 2	1.331	1.796	-0.4643	0.04722	2	2	9.833	5
	Row 3	1.333	1.654	-0.3208	0.04722	2	2	6.794	5
	Row 4	1.196	1.545	-0.3486	0.04722	2	2	7.382	5
	Row 5	1.084	1.436	-0.3526	0.04722	2	2	7.468	5

## Sheet: Figure S1H
		mDC
	Nº of molecules per spot	Experiment 1	Experiment 2	average	SEM
	1	0.520237	0.579376	0.549806	0.0209088
	2	0.375062	0.387822	0.381442	0.00451134
	3	0.051397	0.013461	0.032429	0.0134124
	4	0.053305	0.019341	0.036323	0.0120081
	Sample size	Values correspond to all siglec-1 spots analysed in 9 cells	Values correspond to all siglec-1 spots analysed in 10 cells
		mDC + CN03
	Nº of molecules per spot	Experiment 1	Experiment 2	average	SEM
	1	0.209635	0.309843	0.259739	0.050104
	2	0.622872	0.617515	0.620194	0.0026785
	3	0.064172	0.029565	0.0468685	0.0173035
	4	0.103321	0.043076	0.0731985	0.0301225
	Sample size	Values correspond to all siglec-1 spots analysed in 13 cells	Values correspond to all siglec-1 spots analysed in 18 cells
	Table Analyzed (Two way ANOVA)
	Two-way ANOVA	Ordinary
	Alpha	0.05
	Source of Variation	% of total variation	P value	P value summary	Significant?
	Interaction	9.234	<0,0001	****	Yes
	Row Factor	59.05	<0,0001	****	Yes
	Time	8.678e-13	>0,9999	ns	No
	ANOVA table	SS (Type III)	DF	MS	F (DFn, DFd)	P value
	Interaction	0.8115	3	0.2705	F (3, 104) = 12,34	P<0,0001
	Row Factor	5.189	3	1.73	F (3, 104) = 78,88	P<0,0001
	Time	7.626e-14	1	7.626e-14	F (1, 104) = 3,478e-012	P>0,9999
	Residual	2.28	104	0.02193
	Difference between column means
	Predicted (LS) mean of Control iDC	0.25
	Predicted (LS) mean of Control iDC + CN03	0.25
	Difference between predicted means	-5.446e-08
	SE of difference	0.0292
	95% CI of difference	-0,05791 to 0,05791
	Data summary
	Number of columns (Time)	2
	Number of rows (Row Factor)	4
	Number of values	112
	Bonferroni multiple comparison test
	Number of families	1
	Number of comparisons per family	4
	Alpha	0.05
	Bonferroni's multiple comparisons test	Predicted (LS) mean diff,	95,00% CI of diff,	Below threshold?	Summary	Adjusted P Value
	Control iDC - Control iDC + CN03
	1	0.2695	0,1211 to 0,4180	Yes	****	<0,0001
	2	-0.2297	-0,3781 to -0,08124	Yes	***	0.0006
	3	-0.0161	-0,1646 to 0,1323	No	ns	>0,9999
	4	-0.02374	-0,1722 to 0,1247	No	ns	>0,9999
	Test details	Predicted (LS) mean 1	Predicted (LS) mean 2	Predicted (LS) mean diff,	SE of diff,	N1	N2	t	DF
	Control iDC - Control iDC + CN03
	1	0.5794	0.3098	0.2695	0.0584	10	18	4.615	104
	2	0.3878	0.6175	-0.2297	0.0584	10	18	3.933	104
	3	0.01346	0.02957	-0.0161	0.0584	10	18	0.2757	104
	4	0.01934	0.04308	-0.02374	0.0584	10	18	0.4064	104

## Sheet: Figure S1J
	Experiment 1	mDC	mDC + NSC668394		Experiment 2	iDC	mDC + NSC668394
	1	12.4606	11.8327		1	26.9605	19.364
	2	7.61343	10.0481		2	19.0033	15.2659
	3	11.1481	5.34945		3	31.7997	15.718
	4	17.693	6.01379		4	20.3042	13.352
	5	13.5287	5.75334		5	24.0999	14.2398
	6	12.706	8.97154		6	21.5603	12.9073
	7	12.8122	6.14676		7	22.3928	23.5506
	8	14.1396	7.71755		8	17.0074	16.2974
	9	11.4278	9.01808		9	20.2157
	10	15.1897	8.94081		10	20.8568
	11	12.6787	9.78791		average	22.4201	16.3369
	12	9.59253	11.3251		SD	4.28053	3.54164
	13	9.62557	6.31976
	14	11.8492			Table Analyzed (Mann-Whitney test)
	15	9.70818
	average	12.1449	8.24807		Column B	mDC NSC668394
	SD	2.50741	2.19009		vs.	vs,
					Column A	mDC control
	Table Analyzed (Mann-Whitney test)
					Mann Whitney test
	Column B	mDC NSC668394			P value	0.0044
	vs.	vs,			Exact or approximate P value?	Exact
	Column A	mDC control			P value summary	**
					Significantly different (P < 0.05)?	Yes
	Mann Whitney test				One- or two-tailed P value?	Two-tailed
	P value	0.0003			Sum of ranks in column A,B	126 , 45
	Exact or approximate P value?	Exact			Mann-Whitney U	9
	P value summary	***
	Significantly different (P < 0.05)?	Yes			Difference between medians
	One- or two-tailed P value?	Two-tailed			Median of column A	21,21, n=10
	Sum of ranks in column A,B	292 , 114			Median of column B	15,49, n=8
	Mann-Whitney U	23			Difference: Actual	-5.717
					Difference: Hodges-Lehmann	-6.02
	Difference between medians
	Median of column A	12,46, n=15
	Median of column B	8,941, n=13
	Difference: Actual	-3.52
	Difference: Hodges-Lehmann	-3.734

## Sheet: Figure S1K
		mDC				mDC + NSC668394
	Distance from cell base	Experiment 1	Experiment 2	Average	SEM	Distance from cell base	Experiment 1	Experiment 2	Average	SEM
	1.5	2.28518	2.78647	2.53582	0.250643	1.5	1.78496	1.59598	1.69047	0.0944885
	3	2.30253	3.72385	3.01319	0.710662	3	1.72625	2.1762	1.95123	0.224979
	4.5	2.82918	2.33533	2.58225	0.246927	4.5	1.47212	1.8213	1.64671	0.174587
	6	2.43054	1.43711	1.93382	0.496716	6	1.28981	1.52931	1.40956	0.119746
	7.5	1.80652	1.45236	1.62944	0.177079	7.5	1.19243	1.21096	1.20169	0.0092665
	9	1.42739	1.30844	1.36791	0.0594765	9	1.04804	1.08396	1.066	0.017956
	10.5	1.33061	1.47912	1.40487	0.074257	10.5	1.02283	1.4673	1.24506	0.222236
	12	1.02785	1.36409	1.19597	0.168122	12	1.03321	1	1.0166	0.0166035
	Number of cells analysed	average 10 cells analysed	average 15 cells analysed				average 9 cells analysed	average 13 cells analysed
	Table Analyzed (Two way ANOVA)
	Two-way RM ANOVA	Matching: Across row
	Assume sphericity?	Yes
	Alpha	0.05
	Source of Variation	% of total variation	P value	P value summary	Significant?
	Distribution in z x Treatment	6.884	0.5047	ns	No
	Distribution in z	56.04	0.0075	**	Yes
	Treatment	19.58	0.0022	**	Yes
	Subject	9.458	0.4118	ns	No
	ANOVA table	SS	DF	MS	F (DFn, DFd)	P value
	Distribution in z x Treatment	0.8646	7	0.1235	F (7, 8) = 0,9789	P=0,5047
	Distribution in z	7.038	7	1.005	F (7, 8) = 6,771	P=0,0075
	Treatment	2.46	1	2.46	F (1, 8) = 19,49	P=0,0022
	Subject	1.188	8	0.1485	F (8, 8) = 1,177	P=0,4118
	Residual	1.009	8	0.1262
	Difference between column means
	Mean of Control	1.958
	Mean of pERM inhi.	1.403
	Difference between means	0.5545
	SE of difference	0.1256
	95% CI of difference	0,2649 to 0,8441
	Data summary
	Number of columns (Treatment)	2
	Number of rows (Distribution in z)	8
	Number of subjects (Subject)	16
	Number of missing values	0
	Bonferroni multiple comparison test
	Number of families	1
	Number of comparisons per family	8
	Alpha	0.05
	Bonferroni's multiple comparisons test	Mean Diff,	95,00% CI of diff,	Below threshold?	Summary	Adjusted P Value
	Control - pERM inhi.
	Row 1	0.8454	-0,4606 to 2,151	No	ns	0.3565
	Row 2	1.062	-0,2440 to 2,368	No	ns	0.1388
	Row 3	0.9355	-0,3704 to 2,242	No	ns	0.24
	Row 4	0.5243	-0,7817 to 1,830	No	ns	>0,9999
	Row 5	0.4277	-0,8782 to 1,734	No	ns	>0,9999
	Row 6	0.3019	-1,004 to 1,608	No	ns	>0,9999
	Row 7	0.1598	-1,146 to 1,466	No	ns	>0,9999
	Row 8	0.1794	-1,127 to 1,485	No	ns	>0,9999
	Test details	Mean 1	Mean 2	Mean Diff,	SE of diff,	N1	N2	t	DF
	Control - pERM inhi.
	Row 1	2.536	1.69	0.8454	0.3552	2	2	2.38	8
	Row 2	3.013	1.951	1.062	0.3552	2	2	2.99	8
	Row 3	2.582	1.647	0.9355	0.3552	2	2	2.634	8
	Row 4	1.934	1.41	0.5243	0.3552	2	2	1.476	8
	Row 5	1.629	1.202	0.4277	0.3552	2	2	1.204	8
	Row 6	1.368	1.066	0.3019	0.3552	2	2	0.8499	8
	Row 7	1.405	1.245	0.1598	0.3552	2	2	0.4499	8
	Row 8	1.196	1.017	0.1794	0.3552	2	2	0.5049	8

## Sheet: Figure S1L
		mDC
	Nº of molecules per spot	Experiment 1	Experiment 2	average	SEM
	1	0.335069	0.408928	0.371999	0.0261131
	2	0.390659	0.437878	0.414269	0.0166945
	3	0.131199	0.0216419	0.0764205	0.0387343
	4	0.080385	0.073101	0.076743	0.00257528
	Sample size	Values correspond to all siglec-1 spots analysed in 14 cells	Values correspond to all siglec-1 spots analysed in 14 cells
		mDC + NSC668394
	Nº of molecules per spot	Experiment 1	Experiment 2	average	SEM
	1	0.590048	0.580879	0.585464	0.0045845
	2	0.326638	0.351123	0.33888	0.0122424
	3	0.046196	0.00550809	0.025852	0.020344
	4	0.024718	0.041468	0.033093	0.008375
	Sample size	Values correspond to all siglec-1 spots analysed in 13 cells	Values correspond to all siglec-1 spots analysed in 14 cells
	Table Analyzed (Two way ANOVA)
	Two-way RM ANOVA	Matching: Across row
	Assume sphericity?	Yes
	Alpha	0.05
	Source of Variation	% of total variation	P value	P value summary	Significant?
	Row Factor x Time	8.508	0.0055	**	Yes
	Row Factor	89.7	0.0003	***	Yes
	Time	0.07408	0.4803	ns	No
	Subject	1.232	0.197	ns	No
	ANOVA table	SS	DF	MS	F (DFn, DFd)	P value
	Row Factor x Time	0.05523	3	0.01841	F (3, 4) = 23,14	P=0,0055
	Row Factor	0.5823	3	0.1941	F (3, 4) = 97,08	P=0,0003
	Time	0.0004809	1	0.0004809	F (1, 4) = 0,6044	P=0,4803
	Subject	0.007997	4	0.001999	F (4, 4) = 2,513	P=0,1970
	Residual	0.003183	4	0.0007957
	Difference between column means
	Mean of Control siglec-1	0.2349
	Mean of siglec-1 NSC66 250um	0.2458
	Difference between means	-0.01096
	SE of difference	0.0141
	95% CI of difference	-0,05012 to 0,02819
	Data summary
	Number of columns (Time)	2
	Number of rows (Row Factor)	4
	Number of subjects (Subject)	8
	Number of missing values	0
	Bonferroni multiple comparison test
	Number of families	1
	Number of comparisons per family	4
	Alpha	0.05
	Bonferroni's multiple comparisons test	Mean Diff,	95,00% CI of diff,	Below threshold?	Summary	Adjusted P Value
	Control siglec-1 - siglec-1 NSC66 250um
	1	-0.2135	-0,3352 to -0,09176	Yes	**	0.0065
	2	0.07539	-0,04632 to 0,1971	No	ns	0.2226
	3	0.05057	-0,07114 to 0,1723	No	ns	0.5899
	4	0.04365	-0,07806 to 0,1654	No	ns	0.7867
	Test details	Mean 1	Mean 2	Mean Diff,	SE of diff,	N1	N2	t	DF
	Control siglec-1 - siglec-1 NSC66 250um
	1	0.372	0.5855	-0.2135	0.02821	2	2	7.568	4
	2	0.4143	0.3389	0.07539	0.02821	2	2	2.673	4
	3	0.07642	0.02585	0.05057	0.02821	2	2	1.793	4
	4	0.07674	0.03309	0.04365	0.02821	2	2	1.547	4

[truncated: 3 more sheets: Figure S1M, Figure S1N, Hoja1]
