# Supplementary material for: Actin-regulated Siglec-1 nanoclustering influences HIV-1 capture and virus-containing compartment formation in dendritic cells
Source: eLife journal article supplement (doi:10.7554/elife.78836), 2023-03-20
Supplement: fig4-data1 [file Figure 4-source data 1.xlsx]

## Sheet: Figure 4B
Experiment 1	VLP intensity A.U.				Experiment 2	VLP intensity A.U.
cell nº	mDC	mDC + SMIFH2			cell nº	mDC	mDC + SMIFH2
1	925.789	1428.62			1	2352.88	750.883
2	4712.85	2303.29			2	1688.49	799.331
3	4486.47	1448			3	867.734	1213.14
4	3720.18	1644.28			4	2508.49	1593.3
5	3139.2	1246.58			5	1560.81	712.987
6	2704.23	1191.16			6	919.423	4221.02
7	3788.42	2046.41			7	3607.59	1187.94
8	2074.43	1046.19			8	1826.31	1084.93
9	3134.83	1628.84			9	1655.34	1458.02
10	2910.92	1528.34			10	3515.76	1279.97
11	3444.73	1441.76			11	1615.92	564.987
12	2972.66	865.612			12	1445.28	572.969
13	1070.27	2309.46			13	1546.89	2676.51
14	3258.55	1231.07			14	922.201	590.719
average	3024.54	1525.69			15	1720.98	487.683
SD	1093.92	436.732			average	1850.27	1279.63
					SD	833.121	990.209
Table Analyzed (Mann-Whitney test)
Column B	smifh2 5min				Table Analyzed (Mann-Whitney test)
vs.	vs,
Column A	Control 5min				Column B	smifh2 5min
					vs.	vs,
Mann Whitney test					Column A	Control 5min
P value	0.0006
Exact or approximate P value?	Exact				Mann Whitney test
P value summary	***				P value	0.0086
Significantly different (P < 0.05)?	Yes				Exact or approximate P value?	Exact
One- or two-tailed P value?	Two-tailed				P value summary	**
Sum of ranks in column A,B	274 , 132				Significantly different (P < 0.05)?	Yes
Mann-Whitney U	27				One- or two-tailed P value?	Two-tailed
					Sum of ranks in column A,B	295 , 170
Difference between medians					Mann-Whitney U	50
Median of column A	3137, n=14
Median of column B	1445, n=14				Difference between medians
Difference: Actual	-1692				Median of column A	1655, n=15
Difference: Hodges-Lehmann	-1669				Median of column B	1085, n=15
					Difference: Actual	-570.4
					Difference: Hodges-Lehmann	-636.1

## Sheet: Figure 4C
Experiment 1	VLP intensity A.U.				Experiment 2	VLP intensity A.U.
cell nº	mDC	mDC + CT04			cell nº	mDC	mDC + CT04
1	12254.9	11791.8			1	36018.3	48679.3
2	27345.8	23786.2			2	25294.1	22507.6
3	22073.4	21486.2			3	22414.7	7260.67
4	24905	10773.3			4	23662.8	12894.1
5	14226.2	21358.9			5	16178.5	13127.1
6	10337.5	21255.9			6	41977.9	4272.16
7	17477.4	18419.8			7	13937.5	10122
8	18530	28880.1			8	32517.7	13036.2
9	17276.5	16740.6			9	43952	11376.9
10	33201.8	13100.1			10	9792.61	11074.3
11	10243	15066.5			11	5382.62	8163.18
12	18547.2	11620.5			12	12540.4	6182.16
13	13927.1	11141.1			13	2884.54	26624.6
14	15258	17240.3			14	10522.1	12358.8
15		11564			15		9060.37
average	18257.4	16948.4			16		13843.9
SD	6641.35	5504.48			average	21219.7	14411.5
					SD	13313	10731.4
Table Analyzed (Mann-Whitney test)					Table Analyzed (Mann-Whitney test)
Column B	CT04 5min				Column B	Data Set-B
vs.	vs,				vs.	vs,
Column A	Control 5min				Column A	Data Set-A
Mann Whitney test					Mann Whitney test
P value	0.5907				P value	0.1417
Exact or approximate P value?	Exact				Exact or approximate P value?	Exact
P value summary	ns				P value summary	ns
Significantly different (P < 0.05)?	No				Significantly different (P < 0.05)?	No
One- or two-tailed P value?	Two-tailed				One- or two-tailed P value?	Two-tailed
Sum of ranks in column A,B	223 , 212				Sum of ranks in column A,B	253 , 212
Mann-Whitney U	92				Mann-Whitney U	76
Difference between medians					Difference between medians
Median of column A	17377, n=14				Median of column A	19297, n=14
Median of column B	16741, n=15				Median of column B	11868, n=16
Difference: Actual	-636.3				Difference: Actual	-7429
Difference: Hodges-Lehmann	-822.3				Difference: Hodges-Lehmann	-5647

## Sheet: Figure 4D 
Experiment 1	average siglec-1 molecules per spot			Experiment 2	average siglec-1 molecules per spot			Experiment 3	average siglec-1 molecules per spot
cell nº	control	SMIFH2		cell nº	control	SMIFH2		cell nº	control	SMIFH2
1	2.61677	2.02724		1	1.95957	1.4366		1	2.05519	3.01718
2	2.80024	2.17573		2	1.67602	1.3563		2	1.47382	1.74891
3	2.10722	2.26988		3	2.15534	1.473		3	2.04524	1.63718
4	2.43375	2.1648		4	2.31012	1.51888		4	2.88281	1.53594
5	1.912	2.43571		5	2.86324	1.63678		5	2.82095	2.0478
6	2.06624	1.85259		6	2.58007	1.5901		6	2.7341	1.4589
7	2.29471	2.06756		7	1.86135	1.3839		7	2.60906	1.68767
8	1.89019	2.09007		8	2.63083	1.49617		8	2.08118	1.47018
9	2.33595	1.75835		9	2.68699	1.3326		9	1.89712	1.82381
10		2.18169		10	2.34426	1.8212		10	2.26816	2.59548
average	2.27301	2.10236		11	2.34678	1.38752		11	1.82629
desvest	0.310951	0.195076		12	1.63007	1.6152		12	2.14725
				13	2.25556	1.6521		13	1.8688
				14	1.68281	1.8569		14	2.23185
				15	2.15144	1.8569		average	2.21013	1.90231
				16	2.19437	1.1344		SD	0.399898	0.490736
				17	2.24659	1.27074
				average	2.21032	1.51878
				SD	0.363042	0.206352
Table Analyzed (Mann-Whitney test)				Table Analyzed (Mann-Whitney test)				Table Analyzed (Mann-Whitney test)
Column B	SMIFH2 (red 08,06,2018 / blue 08,02,2019 / green 03, 03, 2018)			Column B	SMIFH2 (red 08,06,2018 / blue 08,02,2019 / green 03, 03, 2018)			Column B	SMIFH2 (red 08,06,2018 / blue 08,02,2019 / green 03, 03, 2018)
vs.	vs,			vs.	vs,			vs.	vs,
Column A	control (red 08,06,2018 / blue 08,02,2019 / green 03, 03, 2018)			Column A	control (red 08,06,2018 / blue 08,02,2019 / green 03, 03, 2018)			Column A	control (red 08,06,2018 / blue 08,02,2019 / green 03, 03, 2018)
Mann Whitney test				Mann Whitney test				Mann Whitney test
P value	0.0821			P value	<0,0001			P value	0.0358
Exact or approximate P value?	Exact			Exact or approximate P value?	Exact			Exact or approximate P value?	Exact
P value summary	ns			P value summary	****			P value summary	*
Significantly different (P < 0.05)?	No			Significantly different (P < 0.05)?	Yes			Significantly different (P < 0.05)?	Yes
One- or two-tailed P value?	Two-tailed			One- or two-tailed P value?	Two-tailed			One- or two-tailed P value?	Two-tailed
Sum of ranks in column A,B	168 , 132			Sum of ranks in column A,B	431 , 164			Sum of ranks in column A,B	211 , 89
Mann-Whitney U	41			Mann-Whitney U	11			Mann-Whitney U	34
Difference between medians				Difference between medians				Difference between medians
Median of column A	1,858, n=11			Median of column A	2,247, n=17			Median of column A	2,114, n=14
Median of column B	1,724, n=13			Median of column B	1,496, n=17			Median of column B	1,718, n=10
Difference: Actual	-0.1341			Difference: Actual	-0.7504			Difference: Actual	-0.3959
Difference: Hodges-Lehmann	-0.1403			Difference: Hodges-Lehmann	-0.72			Difference: Hodges-Lehmann	-0.3675
Experiment 1	siglec-1 molec. per spot (5 min + VLPGag-Cherry)			Experiment 2	siglec-1 molec. per spot (5 min + VLPGag-Cherry)
cell nº	Control	SMIFH2		cell nº	Control	SMIFH2
1	2.88254	2.02504		1	1.84187	2.20481
2	3.85389	1.74606		2	2.13555	2.19055
3	2.38344	1.92348		3	3.14751	2.28802
4	2.48404	1.59486		4	2.50814	2.18159
5	1.92718	1.66666		5	2.14365	1.98071
6	2.58511	1.9482		6	2.70432	2.18553
7	3.5396	1.30349		7	2.59162	1.61758
8	2.48432	1.39504		8	2.56015	1.68001
9	2.62672			9	2.3208
10	2.03266			average	2.43929	2.0411
average	2.67995	1.70035		desvest	0.381606	0.257491
desvest	0.607382	0.262328
Table Analyzed (Mann-Whitney test)				Table Analyzed (Mann-Whitney test)
Column B	Data Set-B			Column B	Data Set-B
vs.	vs,			vs.	vs,
Column A	Data Set-A			Column A	Data Set-A
Mann Whitney test				Mann Whitney test
P value	0.0343			P value	0.0592
Exact or approximate P value?	Exact			Exact or approximate P value?	Exact
P value summary	*			P value summary	ns
Significantly different (P < 0.05)?	Yes			Significantly different (P < 0.05)?	No
One- or two-tailed P value?	Two-tailed			One- or two-tailed P value?	Two-tailed
Sum of ranks in column A,B	119 , 52			Sum of ranks in column A,B	101 , 52
Mann-Whitney U	16			Mann-Whitney U	16
Difference between medians				Difference between medians
Median of column A	2,535, n=10			Median of column A	2,508, n=9
Median of column B	2,236, n=8			Median of column B	2,184, n=8
Difference: Actual	-0.2986			Difference: Actual	-0.3246
Difference: Hodges-Lehmann	-0.3408			Difference: Hodges-Lehmann	-0.3766
Experiment 1	siglec-1 colocalising with VLP molec. per spot (5 min + VLPGag-Cherry).			Experiment 2	siglec-1 molec. per spot (5 min + VLPGag-Cherry)
cell nº	Control	SMIFH2		cell nº	Control	SMIFH2
1	3.39866	5.35906		1	5.22364	6.5929
2	4.41552	4.35814		2	8.40948	4.7725
3	5.50487	4.67912		3	6.41283	7.30928
4	5.01806	4.20127		4	5.23682	4.83587
5	4.54955	4.61658		5	4.29902	8.05904
6	5.47837	4.90482		6	4.73931	6.6428
7	5.37772	3.77242		7	7.13413	7.9288
8	4.20805	3.43189		8	6.32283	6.75272
9	5.10604			9	5.8153
10	4.80266			average	5.95482	6.61174
average	4.78595	4.41541		desvest	1.27721	1.24634
desvest	0.662885	0.617586
Table Analyzed (Mann-Whitney test)				Table Analyzed (Mann-Whitney test)
Column D	Data Set-D			Column D	Data Set-D
vs.	vs,			vs.	vs,
Column C	Data Set-C			Column C	Data Set-C
Mann Whitney test				Mann Whitney test
P value	0.2031			P value	0.2359
Exact or approximate P value?	Exact			Exact or approximate P value?	Exact
P value summary	ns			P value summary	ns
Significantly different (P < 0.05)?	No			Significantly different (P < 0.05)?	No
One- or two-tailed P value?	Two-tailed			One- or two-tailed P value?	Two-tailed
Sum of ranks in column C,D	110 , 61			Sum of ranks in column C,D	68 , 85
Mann-Whitney U	25			Mann-Whitney U	23
Difference between medians				Difference between medians
Median of column C	4,910, n=10			Median of column C	5,815, n=9
Median of column D	4,487, n=8			Median of column D	6,698, n=8
Difference: Actual	-0.423			Difference: Actual	0.8825
Difference: Hodges-Lehmann	-0.4313			Difference: Hodges-Lehmann	0.8111
Experiment 1	siglec-1 NOT colocalising with VLP molec. per spot (5 min + VLPGag-Cherry).			Experiment 2	siglec-1 molec. per spot (5 min + VLPGag-Cherry)
cell nº	Control	SMIFH2		cell nº	Control	SMIFH2
1	1.7267	2.02504		1	2.24946	2.12568
2	1.6418	1.74606		2	2.19138	2.40441
3	1.94413	1.92348		3	2.04097	1.92197
4	2.01304	1.59486		4	1.61585	2.20778
5	1.60133	1.66666		5	2.20266	2.23114
6	2.30918	1.9482		6	2.75969	2.30136
7	1.64761	1.30349		7	2.2998	2.19873
8	1.97026	1.39504		8	2.13941	2.2109
9	1.85113			9	1.84399
10	1.73372			average	2.14924	2.20025
average	1.84389	1.70035		desvest	0.316128	0.139404
desvest	0.219912	0.262328
Table Analyzed				Table Analyzed
Column F	Data Set-F			Column F	Data Set-F
vs.	vs,			vs.	vs,
Column E	Data Set-E			Column E	Data Set-E
Mann Whitney test				Mann Whitney test
P value	0.4082			P value	0.4807
Exact or approximate P value?	Exact			Exact or approximate P value?	Exact
P value summary	ns			P value summary	ns
Significantly different (P < 0.05)?	No			Significantly different (P < 0.05)?	No
One- or two-tailed P value?	Two-tailed			One- or two-tailed P value?	Two-tailed
Sum of ranks in column E,F	105 , 66			Sum of ranks in column E,F	73 , 80
Mann-Whitney U	30			Mann-Whitney U	28
Difference between medians				Difference between medians
Median of column E	1,792, n=10			Median of column E	2,191, n=9
Median of column F	1,706, n=8			Median of column F	2,209, n=8
Difference: Actual	-0.08607			Difference: Actual	0.01796
Difference: Hodges-Lehmann	-0.09732			Difference: Hodges-Lehmann	0.04583

## Sheet: Figure 4F
Cell nº	LUV Intensity (A.U)
	GM1 0.25%	GM1 0.5%	GM1 4%
1	1436.04	1271.39	12903.8
2	791.07	647.875	17375.5
3	1171	1233.96	10474.3
4	1222.32	711.372	12269.5
5	2396.75	928.41	6340.2
6	1327.1	385.405	13787.4
7	1599.73	1360.93	13519
8	2476.66	1891.23	8773.61
9	1191.79	682.392	19404
10	1003.35	492.961	16837.8
11	2331.23	882.234	11165.8
12	1381.45	1276.36	9317.34
13	1530.77	1375.27	9064.74
14	1049.04	719.76	12119.7
15	841.193	1602.78
average	1449.97	1030.82	12382.3
SD	543.621	435.87	3645.41
Table Analyzed (One way ANOVA )
Kruskal-Wallis test
P value	<0,0001
Exact or approximate P value?	Approximate
P value summary	****
Do the medians vary signif. (P < 0.05)?	Yes
Number of groups	3
Kruskal-Wallis statistic	29.82
Data summary
Number of treatments (columns)	3
Number of values (total)	44
Kruskal-Wallis multiple comparison test
Number of families	1
Number of comparisons per family	3
Alpha	0.05
Dunn's multiple comparisons test	Mean rank diff,	Significant?	Summary	Adjusted P Value
0.25% vs. 0.5%	6.333	No	ns	0.5308	A-B
0.25% vs. 4%	-18.83	Yes	***	0.0002	A-C
0.5% vs. 4%	-25.17	Yes	****	<0,0001	B-C
Test details	Mean rank 1	Mean rank 2	Mean rank diff,	n1	n2	Z
0.25% vs. 0.5%	18.67	12.33	6.333	15	15	1.35
0.25% vs. 4%	18.67	37.5	-18.83	15	14	3.945
0.5% vs. 4%	12.33	37.5	-25.17	15	14	5.272

## Sheet: Figure 4G
	Cell nº	Average siglec-1 spot size
		GM1 0.25%	GM1 0.5%	GM1 4%
	1	0.02822	0.03135	0.02455
	2	0.02183	0.02828	0.01913
	3	0.04112	0.02272	0.0149
	4	0.01105	0.06466	0.02415
	5	0.02687	0.02722	0.02492
	6	0.02807	0.01575	0.02369
	7	0.03843	0.02235	0.01961
	8	0.03201	0.03273	0.03222
	9	0.04819	0.04382	0.02469
	10	0.03028	0.02747	0.01732
	11	0.03432	0.0407	0.01425
	12	0.02334	0.03607	0.02184
	13	0.07162		0.02287
	average	0.0334885	0.03276	0.0218569
	SD	0.0147459	0.0127678	0.00483935
	Table Analyzed (One way ANOVA)
	Kruskal-Wallis test
	P value	0.0076
	Exact or approximate P value?	Approximate
	P value summary	**
	Do the medians vary signif. (P < 0.05)?	Yes
	Number of groups	3
	Kruskal-Wallis statistic	9.757
	Data summary
	Number of treatments (columns)	3
	Number of values (total)	38
	Kruskal-Wallis multiple comparison test
	Number of families	1
	Number of comparisons per family	3
	Alpha	0.05
	Dunn's multiple comparisons test	Mean rank diff,	Significant?	Summary	Adjusted P Value
	0.25 vs. 0.5	0.2756	No	ns	>0,9999	A-B
	0.25 vs. 4	12	Yes	*	0.0177	A-C
	0.5 vs. 4	11.72	Yes	*	0.0252	B-C
	Test details	Mean rank 1	Mean rank 2	Mean rank diff,	n1	n2	Z
	0.25 vs. 0.5	23.69	23.42	0.2756	13	12	0.06196
	0.25 vs. 4	23.69	11.69	12	13	13	2.753
	0.5 vs. 4	23.42	11.69	11.72	12	13	2.635

## Sheet: Figure 4H
		GM-1 0.25% LUV (cells nalaysed)
	Number of molecules per spot	1	2	3	4	5	6	7	8	9	10	11	12	average	SD
	1	1.29e-08	1.95e-09	0.175457	7.51e-09	2.42e-09	5.75e-08	1.11e-09	6.67e-08	1.5e-08	2.25e-07	3.21e-09	0.285829	0.0384405	0.0928103
	2	0.304507	9.99e-09	0.424634	0.088443	0.232766	7.01e-08	0.062509	6.69e-08	0.107309	3e-07	3.41e-09	3.59e-06	0.101681	0.143462
	3	7.52e-08	0.301832	4.08e-09	7.22e-08	0.262832	2.19e-07	0.474084	7.13e-08	0.497243	0.577322	6.33e-09	1.2e-06	0.17611	0.232245
	4	0.695493	0.698168	0.399909	0.911557	0.384539	1	0.463408	1	0.395448	0.422678	1	0.714166	0.673781	0.256185
		GM-1 0.5% LUV (cells nalaysed)
	Number of molecules per spot	1	2	3	4	5	6	7	8	9	10	11	12	13	average	SD
	1	1.62e-07	3.1e-09	6.67e-08	0.500436	6e-07	0.167171	6.67e-08	2.17e-08	6.73e-09	1e-06	2.19e-09	1.09e-06	5e-09	0.0513546	0.142623
	2	0.195123	0.104726	6.69e-08	2.05e-07	0.213818	5.08e-07	6.67e-08	0.206237	8.87e-09	0.114423	4.09e-09	0.212749	5e-09	0.0805444	0.0963115
	3	0.179676	0.182799	7.07e-08	1.59e-07	4.08e-06	6.54e-07	6.68e-08	0.294137	0.04221	2.78e-06	0.334113	0.091335	5e-09	0.0864829	0.12136
	4	0.625202	0.712476	0.999999	0.499564	0.786177	0.832829	1	0.499626	0.95779	0.885573	0.665887	0.695915	1	0.781618	0.181801
		GM-1 4% LUV (cells nalaysed)
	Number of molecules per spot	1	2	3	4	5	6	7	8	9	10	11	12	13	average	SD
	1	1.28e-07	0.005772	1.68e-09	1.39e-08	8.66e-09	5.67e-08	7.83e-07	0.07045	4.76e-09	3.97e-09	0.089529	2.86e-08	4.1e-07	0.0127502	0.0301366
	2	0.144233	0.205767	0.439139	0.13837	0.226717	0.443848	0.526197	0.329091	0.135241	0.504025	0.609306	0.13343	0.141498	0.305912	0.176436
	3	0.258969	0.329569	0.332972	0.117106	0.296837	0.206776	0.131981	0.222083	0.463683	0.206897	0.301165	0.279038	0.294726	0.264754	0.0912308
	4	0.596797	0.458891	0.227889	0.744525	0.476445	0.349376	0.341821	0.378375	0.401077	0.289079	7.27e-08	0.587532	0.563775	0.416583	0.190065
	Table Analyzed (Two way ANOVA)							Multiple comparison Bonferroni
								Compare each cell mean with the other cell mean in that row
	Two-way ANOVA	Ordinary
	Alpha	0.05						Number of families	4
								Number of comparisons per family	3
	Source of Variation	% of total variation	P value	P value summary	Significant?			Alpha	0.05
	Interaction	12.17	<0,0001	****	Yes
	Number of molecules per spot	60.35	<0,0001	****	Yes			Bonferroni's multiple comparisons test	Predicted (LS) mean diff,	95,00% CI of diff,	Below threshold?	Summary	Adjusted P Value
	GM-1 concentration	0.001632	0.9959	ns	No
								1
	ANOVA table	SS (Type III)	DF	MS	F (DFn, DFd)	P value		5min 0.5% vs. 5min 0.25%	-0.01291	-0,1659 to 0,1401	No	ns	>0,9999
	Interaction	1.527	6	0.2545	F (6, 140) = 10,23	P<0,0001		5min 0.5% vs. 5min 4%	0.02569	-0,1273 to 0,1787	No	ns	>0,9999
	Number of molecules per spot	7.573	3	2.524	F (3, 140) = 101,5	P<0,0001		5min 0.25% vs. 5min 4%	0.0386	-0,1113 to 0,1885	No	ns	>0,9999
	GM-1 concentration	0.0002048	2	0.0001024	F (2, 140) = 0,004116	P=0,9959
	Residual	3.483	140	0.02488				2
								5min 0.5% vs. 5min 0.25%	0.02114	-0,1319 to 0,1741	No	ns	>0,9999
	Data summary							5min 0.5% vs. 5min 4%	-0.2042	-0,3572 to -0,05123	Yes	**	0.0046
	Number of columns (GM-1 concentration)	3						5min 0.25% vs. 5min 4%	-0.2254	-0,3753 to -0,07546	Yes	**	0.0011
	Number of rows (Number of molecules per spot)	4
	Number of values	152						3
								5min 0.5% vs. 5min 0.25%	0.08963	-0,06337 to 0,2426	No	ns	0.474
								5min 0.5% vs. 5min 4%	-0.08864	-0,2416 to 0,06435	No	ns	0.4877
								5min 0.25% vs. 5min 4%	-0.1783	-0,3282 to -0,02836	Yes	*	0.0137
								4
								5min 0.5% vs. 5min 0.25%	-0.1078	-0,2608 to 0,04516	No	ns	0.2696
								5min 0.5% vs. 5min 4%	0.2572	0,1042 to 0,4102	Yes	***	0.0002
								5min 0.25% vs. 5min 4%	0.365	0,2151 to 0,5149	Yes	****	<0,0001
								Test details	Predicted (LS) mean 1	Predicted (LS) mean 2	Predicted (LS) mean diff,	SE of diff,	N1	N2	t	DF
								1
								5min 0.5% vs. 5min 0.25%	0.03844	0.05135	-0.01291	0.06314	12	13	0.2045	140
								5min 0.5% vs. 5min 4%	0.03844	0.01275	0.02569	0.06314	12	13	0.4069	140
								5min 0.25% vs. 5min 4%	0.05135	0.01275	0.0386	0.06187	13	13	0.624	140
								2
								5min 0.5% vs. 5min 0.25%	0.1017	0.08054	0.02114	0.06314	12	13	0.3347	140
								5min 0.5% vs. 5min 4%	0.1017	0.3059	-0.2042	0.06314	12	13	3.234	140
								5min 0.25% vs. 5min 4%	0.08054	0.3059	-0.2254	0.06187	13	13	3.643	140
								3
								5min 0.5% vs. 5min 0.25%	0.1761	0.08648	0.08963	0.06314	12	13	1.419	140
								5min 0.5% vs. 5min 4%	0.1761	0.2648	-0.08864	0.06314	12	13	1.404	140
								5min 0.25% vs. 5min 4%	0.08648	0.2648	-0.1783	0.06187	13	13	2.882	140
								4
								5min 0.5% vs. 5min 0.25%	0.6738	0.7816	-0.1078	0.06314	12	13	1.708	140
								5min 0.5% vs. 5min 4%	0.6738	0.4166	0.2572	0.06314	12	13	4.073	140
								5min 0.25% vs. 5min 4%	0.7816	0.4166	0.365	0.06187	13	13	5.9	140

## Sheet: Figure 4J
	0.25 % GM-1 LUVs	siglec-1 (molec. / um2)
	distance from coloc. Spots	cell 1	cell 2	cell 3	cell 4	cell 5	cell 6	cell 7	cell 8	cell 9	cell 10	cell 11	cell 12	cell 13	average	SD
	0.6	51.1705	56.4059	87.1987	13.1672	40.8709	44.0632	110,5015*	36.1131	87.2804	27.1846	30.3211	36.8038	52.4774	46.9214	22.276
	1.2	23.0948	28.8214	42.1108	6.32848	17.9859	24.2343	65,11207*	36.906	49.2283	24.8175	19.3629	17.6998	34.4678	27.0882	11.911
	3	16.7399	20.7296	26.9369	4.41834	12.1118	16.3958	38,68149*	37.7535	35.1829	18.1312	11.8588	14.5834	21.3934	19.6863	9.64302
	0.5 % GM-1 LUVs	siglec-1 (molec. / um2)
	distance from coloc. Spots	cell 1	cell 2	cell 3	cell 4	cell 5	cell 6	cell 7	cell 8	cell 9	cell 10	cell 11	average	SD
	0.6	43.7071	37.3411	41.359	109,1771*	26.5238	46.7026	22.0422	38.3407	20.8817	20.1792	14.0388	31.1116	11.6273
	1.2	20.2215	14.9723	11.772	65,03713*	13.6595	26.5913	13.2302	19.9706	10.2948	12.3214	10.0996	15.3133	5.31273
	3	13.3717	10.7279	8.25786	39,81838*	8.78338	17.3914	9.56752	11.9744	8.2319	7.77658	7.95549	10.4038	3.08674
	0.5 % GM-1 LUVs	siglec-1 (molec. / um2)
	distance from coloc. Spots	cell 1	cell 2	cell 3	cell 4	cell 5	cell 6	cell 7	cell 8	cell 9	cell 10	cell 11	cell 12	average	SD
	0.6	43.0282	19.9793	60,20727*	24.5983	24.5293	25.3264	40.739	41.4491	19.1171	7.52961	60,5691*	42.3154	28.8612	12.2907
	1.2	23.3883	7.92221	36,31093*	14.6287	18.5963	15.9166	19.1224	23.0925	12.9461	5.03955	29,34965*	21.2508	16.1903	6.19305
	3	15.5139	5.15868	24,55083*	10.5983	14.4447	12.0237	12.6836	16.1869	9.57748	4.12964	19,63037*	14.0374	11.4354	4.13475
	Table Analyzed (One way ANOVA). For 0.25% GM-1 LUVs			Kruskal-Wallis multiple comparison test. For 0.25% GM-1 LUVs
				Number of families	1
	Kruskal-Wallis test			Number of comparisons per family	3
	P value	<0,0001		Alpha	0.05
	Exact or approximate P value?	Approximate
	P value summary	****		Dunn's multiple comparisons test	Mean rank diff,	Significant?	Summary	Adjusted P Value
	Do the medians vary signif. (P < 0.05)?	Yes		B (0.6) vs. F (1.2)	33.39	Yes	*	0.015	A-B
	Number of groups	3		B (0.6) vs. J (3)	60.21	Yes	****	<0,0001	A-C
	Kruskal-Wallis statistic	25.72		F (1.2) vs. J (3)	26.82	No	ns	0.0725	B-C
	Data summary			Test details	Mean rank 1	Mean rank 2	Mean rank diff,	n1	n2	Z
	Number of treatments (columns)	3		B (0.6) vs. F (1.2)	172.7	139.3	33.39	94	94	2.807
	Number of values (total)	282		B (0.6) vs. J (3)	172.7	112.5	60.21	94	94	5.062
				F (1.2) vs. J (3)	139.3	112.5	26.82	94	94	2.255
	Table Analyzed (One way ANOVA). For 0.5% GM-1 LUVs			Kruskal-Wallis multiple comparison test. For 0.5% GM-1 LUVs
				Number of families	1
	Kruskal-Wallis test			Number of comparisons per family	3
	P value	<0,0001		Alpha	0.05
	Exact or approximate P value?	Approximate
	P value summary	****		Dunn's multiple comparisons test	Mean rank diff,	Significant?	Summary	Adjusted P Value
	Do the medians vary signif. (P < 0.05)?	Yes		2-2 (0.6) vs. 6-6 (1.2)	34.25	Yes	**	0.0093	A-B
	Number of groups	3		2-2 (0.6) vs. 10-10 (3)	68.6	Yes	****	<0,0001	A-C
	Kruskal-Wallis statistic	35.11		6-6 (1.2) vs. 10-10 (3)	34.35	Yes	**	0.009	B-C
	Data summary			Test details	Mean rank 1	Mean rank 2	Mean rank diff,	n1	n2	Z
	Number of treatments (columns)	3		2-2 (0.6) vs. 6-6 (1.2)	168.3	134	34.25	89	89	2.959
	Number of values (total)	267		2-2 (0.6) vs. 10-10 (3)	168.3	99.69	68.6	89	89	5.926
				6-6 (1.2) vs. 10-10 (3)	134	99.69	34.35	89	89	2.967
	Table Analyzed (One way ANOVA). For 4 % GM-1 LUVs			Kruskal-Wallis multiple comparison test. For 4% GM-1 LUVs
				Number of families	1
	Kruskal-Wallis test			Number of comparisons per family	3
	P value	<0,0001		Alpha	0.05
	Exact or approximate P value?	Approximate
	P value summary	****		Dunn's multiple comparisons test	Mean rank diff,	Significant?	Summary	Adjusted P Value
	Do the medians vary signif. (P < 0.05)?	Yes		2 (0.6) vs. 6 (1.2)	356.4	Yes	****	<0,0001	A-B
	Number of groups	3		2 (0.6) vs. 10 (3)	862.9	Yes	****	<0,0001	A-C
	Kruskal-Wallis statistic	304.9		6 (1.2) vs. 10 (3)	506.5	Yes	****	<0,0001	B-C
	Data summary			Test details	Mean rank 1	Mean rank 2	Mean rank diff,	n1	n2	Z
	Number of treatments (columns)	3		2 (0.6) vs. 6 (1.2)	2873	2517	356.4	1644	1644	7.175
	Number of values (total)	4932		2 (0.6) vs. 10 (3)	2873	2010	862.9	1644	1644	17.37
				6 (1.2) vs. 10 (3)	2517	2010	506.5	1644	1644	10.2
