# Supplementary material for: Actin-regulated Siglec-1 nanoclustering influences HIV-1 capture and virus-containing compartment formation in dendritic cells
Source: eLife journal article supplement (doi:10.7554/elife.78836), 2023-03-20
Supplement: fig4-figsupp1-data1 [file elife-78836-fig4-figsupp1-data1-v2.zip]

## Sheet: Figure S1B
	Experiment 1	VLP-GapCherry Intensity			Experiment 2	VLP-GapCherry Intensity
	cell nº	mDC	mDC + CT04		cell nº	mDC	mDC + CT04
	1	2982.09	1356.84		1	272.269	532.708
	2	3224.11	4665,084*		2	396.267	321.109
	3	3488.69	1494.75		3	1004.16	328.511
	4	3441.4	2022.06		4	445.354	242.485
	5	4161.85	1729.74		5	522.409	775.184
	6	1360.31	2037.11		6	1711.12	511.287
	7	2957.1	1318.65		7	1000.18	160.384
	8	1359.72	1572.04		8	573.32	1105.28
	9	2647.62	1471.69		9	1556.23	1452,438*
	10	1903.94	2147.49		10	721.471	763.22
	11	2154.87	1177.75		11	951.619	802.821
	12	3396.47	1133.92		12	1323.9	447.28
	13	1400.6	1222.26		13	414.082	225.781
	14	1622.05	2323.32		14	746.466	258.347
	15		1661.82		average	831.346	498.031
	average	2578.63	1619.25		SD	449.029	286.307
	SD	935.747	383.547
					Table Analyzed (Mann Whitney test)
	Table Analyzed (Mann Whitney test)
					Column B	CT04 5min
	Column B	CT04 5min			vs.	vs,
	vs.	vs,			Column A	Control 5min
	Column A	Control 5min
					Mann Whitney test
	Mann Whitney test				P value	0.0482
	P value	0.0049			Exact or approximate P value?	Exact
	Exact or approximate P value?	Exact			P value summary	*
	P value summary	**			Significantly different (P < 0.05)?	Yes
	Significantly different (P < 0.05)?	Yes			One- or two-tailed P value?	Two-tailed
	One- or two-tailed P value?	Two-tailed			Sum of ranks in column A,B	237 , 141
	Sum of ranks in column A,B	263 , 143			Mann-Whitney U	50
	Mann-Whitney U	38
					Difference between medians
	Difference between medians				Median of column A	734,0, n=14
	Median of column A	2802, n=14			Median of column B	447,3, n=13
	Median of column B	1533, n=14			Difference: Actual	-286.7
	Difference: Actual	-1269			Difference: Hodges-Lehmann	-242.9
	Difference: Hodges-Lehmann	-1003

## Sheet: Figure S1C
	Experiment 1	siglec-1 Intensity			Experiment 2	siglec-1 Intensity
	cell nº	mDC	mDC + CT04		cell nº	mDC	mDC + CT04
	1	15937.5	7771.87		1	2400.24	4792.11
	2	18605	14658.5		2	6722.58	10208.9
	3	10282	17593.2		3	3342.92	5073.1
	4	9033.59	4847.43		4	25779,25*	6658.39
	5	8088.71	7982.08		5	9202.19	2118.58
	6	8237.28	7435.64		6	10743.6	2104.84
	7	13214.6	4805.52		7	3974.17	9336.1
	8	7320.35	7020.91		8	12366.8	15203
	9	7640.27	12078.7		9	5210.79	11374.3
	10	11362.7	5295.09		10	10296.5
	11	11293	9211.23		11	10775.9
	12	18132.6	12119.8		average	7503.56	7429.92
	13		7658.07		SD	3608.95	4430.15
	14		6549.22
	15		11063		Table Analyzed (Mann Whitney test)
	16		28535,86*
	average	11595.6	9072.69		Column B	CT04 5min
	SD	4036.99	3850.69		vs.	vs,
					Column A	Control 5min
	Table Analyzed (Mann Whitney test)
					Mann Whitney test
	Column B	CT04 5min			P value	0.7802
	vs.	vs,			Exact or approximate P value?	Exact
	Column A	Control 5min			P value summary	ns
					Significantly different (P < 0.05)?	No
	Mann Whitney test				One- or two-tailed P value?	Two-tailed
	P value	0.0746			Sum of ranks in column A,B	104 , 86
	Exact or approximate P value?	Exact			Mann-Whitney U	41
	P value summary	ns
	Significantly different (P < 0.05)?	No			Difference between medians
	One- or two-tailed P value?	Two-tailed			Median of column A	7962, n=10
	Sum of ranks in column A,B	205 , 173			Median of column B	6658, n=9
	Mann-Whitney U	53			Difference: Actual	-1304
					Difference: Hodges-Lehmann	-288.5
	Difference between medians
	Median of column A	10788, n=12
	Median of column B	7772, n=15
	Difference: Actual	-3016
	Difference: Hodges-Lehmann	-2479
