# Supplementary material for: Actin-regulated Siglec-1 nanoclustering influences HIV-1 capture and virus-containing compartment formation in dendritic cells
Source: eLife journal article supplement (doi:10.7554/elife.78836), 2023-03-20
Supplement: fig5-data1 [file Figure 5-source data 1.xlsx]

## Sheet: Figure 5B
	5min VLP-GagCherry	iDC (siglec-1 molecules per spot)
	Number of siglec-1 molecules per spot	cell 1	cell 2	cell 3	cell 4	cell 5	cell 6	cell 7	cell 8	cell 9	cell 10	average	SD
	1	0.272253	0.827304	0.011379	8.1e-09	3.61e-07	2.83e-08	7.25e-09	2.13e-08	0.114465	0.05745	0.128285	0.260452
	2	0.439719	0.172694	0.587133	0.752387	0.623119	0.391617	0.750713	0.490867	0.401669	0.557239	0.516716	0.177028
	3	0.288028	3.73e-07	0.401373	1.01e-08	0.123057	0.244071	6.46e-07	0.509133	0.275707	0.278195	0.211957	0.177057
	4	5.21e-07	1.67e-06	0.000116	0.247613	0.253823	0.364311	0.249287	1.08e-07	0.20816	0.107115	0.143043	0.137759
	30min VLP-GagCherry	iDC (siglec-1 molecules per spot)
	Number of siglec-1 molecules per spot	cell 1	cell 2	cell 3	cell 4	cell 5	cell 6	cell 7	cell 8	cell 9	cell 10	average	SD
	1	0.070896	0.448276	1.57e-06	0.097695	8.28e-10	0.03905	0.161048	0.438957	0.14164	0.054142	0.145171	0.16597
	2	0.701592	0.551724	0.398552	0.622155	0.477861	0.539604	0.741224	0.561043	0.677028	0.829558	0.610034	0.12969
	3	0.102188	1.57e-07	0.354981	0.280143	0.289907	0.395464	4.09e-07	4.16e-08	0.181329	0.017313	0.162133	0.158353
	4	0.125324	5.36e-08	0.246465	7.6e-06	0.232232	0.025883	0.097728	1.07e-07	2.67e-06	0.098988	0.082663	0.0954931
	60min VLP-GagCherry	iDC (siglec-1 molecules per spot)
	Number of siglec-1 molecules per spot	cell 1	cell 2	cell 3	cell 4	cell 5	cell 6	cell 7	cell 8	cell 9	cell 10	average	SD
	1	4.36e-08	0.067891	0.077343	8.45e-06	0.157969	0.178719	2.19e-09	0.075303	1.27e-09	2.48e-08	0.0557234	0.0683987
	2	0.262717	0.175018	0.079815	0.328074	0.51531	0.457687	0.241059	0.441536	0.317479	0.164028	0.298272	0.141333
	3	0.259063	0.248443	0.326172	0.083703	0.32672	0.242471	0.52328	0.387307	0.269551	0.666648	0.333336	0.162463
	4	0.478221	0.508648	0.51667	0.588214	3.42e-07	0.121123	0.23566	0.095853	0.41297	0.169324	0.312668	0.211176
	Table Analyzed (Two way ANOVA)							Bonferroni multiple comparisons
								Compare each cell mean with the other cell mean in that row
	Two-way ANOVA	Ordinary
	Alpha	0.05						Number of families	4
								Number of comparisons per family	3
	Source of Variation	% of total variation	P value	P value summary	Significant?			Alpha	0.05
	Interaction	16.14	<0,0001	****	Yes
	Mulecules per spot	36.67	<0,0001	****	Yes			Bonferroni's multiple comparisons test	Mean Diff,	95,00% CI of diff,	Below threshold?	Summary	Adjusted P Value
	Time	4.631e-12	>0,9999	ns	No
								1
	ANOVA table	SS	DF	MS	F (DFn, DFd)	P value		5MIN iDC vs. 30min iDC	-0.01689	-0,1955 to 0,1617	No	ns	>0,9999
	Interaction	0.9967	6	0.1661	F (6, 108) = 6,158	P<0,0001		5MIN iDC vs. 60min iDC	0.07256	-0,1061 to 0,2512	No	ns	0.9762
	Mulecules per spot	2.264	3	0.7548	F (3, 108) = 27,98	P<0,0001		30min iDC vs. 60min iDC	0.08945	-0,08917 to 0,2681	No	ns	0.6779
	Time	2.859e-13	2	1.43e-13	F (2, 108) = 5,300e-012	P>0,9999
	Residual	2.913	108	0.02698				2
								5MIN iDC vs. 30min iDC	-0.09332	-0,2719 to 0,08530	No	ns	0.6199
	Data summary							5MIN iDC vs. 60min iDC	0.2184	0,03982 to 0,3971	Yes	*	0.0109
	Number of columns (Time)	3						30min iDC vs. 60min iDC	0.3118	0,1331 to 0,4904	Yes	***	0.0001
	Number of rows (Mulecules per spot)	4
	Number of values	120						3
								5MIN iDC vs. 30min iDC	0.04982	-0,1288 to 0,2284	No	ns	>0,9999
								5MIN iDC vs. 60min iDC	-0.1214	-0,3000 to 0,05724	No	ns	0.304
								30min iDC vs. 60min iDC	-0.1712	-0,3498 to 0,007418	No	ns	0.0649
								4
								5MIN iDC vs. 30min iDC	0.06038	-0,1182 to 0,2390	No	ns	>0,9999
								5MIN iDC vs. 60min iDC	-0.1696	-0,3482 to 0,008996	No	ns	0.0685
								30min iDC vs. 60min iDC	-0.23	-0,4086 to -0,05138	Yes	**	0.0067
								Test details	Mean 1	Mean 2	Mean Diff,	SE of diff,	N1	N2	t	DF
								1
								5MIN iDC vs. 30min iDC	0.1283	0.1452	-0.01689	0.07345	10	10	0.2299	108
								5MIN iDC vs. 60min iDC	0.1283	0.05572	0.07256	0.07345	10	10	0.9879	108
								30min iDC vs. 60min iDC	0.1452	0.05572	0.08945	0.07345	10	10	1.218	108
								2
								5MIN iDC vs. 30min iDC	0.5167	0.61	-0.09332	0.07345	10	10	1.27	108
								5MIN iDC vs. 60min iDC	0.5167	0.2983	0.2184	0.07345	10	10	2.974	108
								30min iDC vs. 60min iDC	0.61	0.2983	0.3118	0.07345	10	10	4.244	108
								3
								5MIN iDC vs. 30min iDC	0.212	0.1621	0.04982	0.07345	10	10	0.6783	108
								5MIN iDC vs. 60min iDC	0.212	0.3333	-0.1214	0.07345	10	10	1.653	108
								30min iDC vs. 60min iDC	0.1621	0.3333	-0.1712	0.07345	10	10	2.331	108
								4
								5MIN iDC vs. 30min iDC	0.143	0.08266	0.06038	0.07345	10	10	0.822	108
								5MIN iDC vs. 60min iDC	0.143	0.3127	-0.1696	0.07345	10	10	2.309	108
								30min iDC vs. 60min iDC	0.08266	0.3127	-0.23	0.07345	10	10	3.131	108

## Sheet: Figure 5C
		5min VLP-GagCherry
	Number of siglec-1 molecules per spot	cell 1	cell 2	cell 3	cell 4	cell 5	cell 6	cell 7	cell 8	cell 9	average	SD
	1	3.94e-07	5.94e-10	2.12e-08	2.11e-10	5.54e-09	3.73e-09	8.64e-09	5.68e-07	2e-07	1.33546e-07	1.99421e-07
	2	0.13303	7.55e-10	2.99e-08	0.177352	0.101881	0.034744	0.11348	0.01039	0.74481	0.146187	0.220133
	3	0.423442	0.018274	0.547414	0.466145	0.614231	0.11958	0.486655	0.439812	0.120864	0.359602	0.202546
	4	0.443528	0.981725	0.452585	0.356504	0.283888	0.845677	0.399865	0.549799	0.134326	0.494211	0.251707
		30min VLP-GagCherry
	Number of siglec-1 molecules per spot	cell 1	cell 2	cell 3	cell 4	cell 5	cell 6	cell 7	cell 8	cell 9	cell 10	average	SD
	1	7.86e-07	1.59e-07	2.06e-09	9.0619e-10	5.29779e-10	5.38795e-09	3.57795e-09	4.47973e-09	2.4277e-10	1.11904e-08	9.73375e-08	2.46875e-07
	2	0.027886	0.056312	0.008233	1.93e-09	6.3e-10	0.014121	1.82e-08	0.029163	0.074414	0.037992	0.0248121	0.0255838
	3	0.068132	0.080068	0.24502	0.095163	0.011136	0.206718	0.293942	0.125043	0.159112	0.133675	0.141801	0.0863766
	4	0.903982	0.86362	0.746747	0.904836	0.988864	0.779161	0.706057	0.845794	0.766474	0.828332	0.833387	0.0859538
		60min VLP-GagCherry
	Number of siglec-1 molecules per spot	cell 1	cell 2	cell 3	cell 4	cell 5	cell 6	cell 7	cell 8	cell 9	cell 10	average	SD
	1	1.26e-08	2.19e-09	8.18e-09	7.99e-07	5.6e-09	0.029574	1.37e-10	1.16e-09	4.85e-09	4.17e-07	0.00295753	0.00935208
	2	2.37e-08	0.104678	0.069574	1.26e-06	0.043619	0.087859	0.002041	0.019728	0.003796	5.01e-07	0.0331297	0.0406227
	3	0.041187	0.585284	0.178587	0.059124	0.079588	0.083272	0.034455	0.321352	0.156121	0.06062	0.159959	0.173059
	4	0.958812	0.310037	0.75184	0.940875	0.876794	0.799294	0.963504	0.65892	0.840084	0.939378	0.803954	0.200239											1
	Table Analyzed (Two way ANOVA)							Bonferroni multiple comparisons
								Compare each cell mean with the other cell mean in that row
	Two-way ANOVA	Ordinary
	Alpha	0.05						Number of families	4
								Number of comparisons per family	3
	Source of Variation	% of total variation	P value	P value summary	Significant?			Alpha	0.05
	Interaction	8.224	<0,0001	****	Yes
	Molecules per spot	72.17	<0,0001	****	Yes			Tukey's multiple comparisons test	Predicted (LS) mean diff,	95,00% CI of diff,	Below threshold?	Summary	Adjusted P Value
	Time	1.931e-12	>0,9999	ns	No
								1
	ANOVA table	SS (Type III)	DF	MS	F (DFn, DFd)	P value		5MIN mDC vs. 30min mDC	3.621e-08	-0,1575 to 0,1575	No	ns	>0,9999
	Interaction	1.015	6	0.1692	F (6, 104) = 8,145	P<0,0001		5MIN mDC vs. 60min mDC	-0.002957	-0,1604 to 0,1545	No	ns	0.9989
	Molecules per spot	8.912	3	2.971	F (3, 104) = 143,0	P<0,0001		30min mDC vs. 60min mDC	-0.002957	-0,1562 to 0,1503	No	ns	0.9988
	Time	2.385e-13	2	1.192e-13	F (2, 104) = 5,738e-012	P>0,9999
	Residual	2.161	104	0.02078				2
								5MIN mDC vs. 30min mDC	0.1214	-0,03611 to 0,2789	No	ns	0.1641
	Data summary							5MIN mDC vs. 60min mDC	0.1131	-0,04443 to 0,2705	No	ns	0.2074
	Number of columns (Time)	3						30min mDC vs. 60min mDC	-0.008318	-0,1616 to 0,1450	No	ns	0.9909
	Number of rows (Molecules per spot)	4
	Number of values	116						3
								5MIN mDC vs. 30min mDC	0.2178	0,06031 to 0,3753	Yes	**	0.0039
								5MIN mDC vs. 60min mDC	0.1996	0,04216 to 0,3571	Yes	**	0.009
								30min mDC vs. 60min mDC	-0.01816	-0,1714 to 0,1351	No	ns	0.9572
								4
								5MIN mDC vs. 30min mDC	-0.3392	-0,4967 to -0,1817	Yes	****	<0,0001
								5MIN mDC vs. 60min mDC	-0.3097	-0,4672 to -0,1523	Yes	****	<0,0001
								30min mDC vs. 60min mDC	0.02943	-0,1239 to 0,1827	No	ns	0.8916
								Test details	Predicted (LS) mean 1	Predicted (LS) mean 2	Predicted (LS) mean diff,	SE of diff,	N1	N2	q	DF
								1
								5MIN mDC vs. 30min mDC	1.335e-07	9.734e-08	3.621e-08	0.06623	9	10	7.731e-07	104
								5MIN mDC vs. 60min mDC	1.335e-07	0.002958	-0.002957	0.06623	9	10	0.06315	104
								30min mDC vs. 60min mDC	9.734e-08	0.002958	-0.002957	0.06447	10	10	0.06488	104
								2
								5MIN mDC vs. 30min mDC	0.1462	0.02481	0.1214	0.06623	9	10	2.592	104
								5MIN mDC vs. 60min mDC	0.1462	0.03313	0.1131	0.06623	9	10	2.414	104
								30min mDC vs. 60min mDC	0.02481	0.03313	-0.008318	0.06447	10	10	0.1825	104
								3
								5MIN mDC vs. 30min mDC	0.3596	0.1418	0.2178	0.06623	9	10	4.65	104
								5MIN mDC vs. 60min mDC	0.3596	0.16	0.1996	0.06623	9	10	4.263	104
								30min mDC vs. 60min mDC	0.1418	0.16	-0.01816	0.06447	10	10	0.3983	104
								4
								5MIN mDC vs. 30min mDC	0.4942	0.8334	-0.3392	0.06623	9	10	7.242	104
								5MIN mDC vs. 60min mDC	0.4942	0.804	-0.3097	0.06623	9	10	6.614	104
								30min mDC vs. 60min mDC	0.8334	0.804	0.02943	0.06447	10	10	0.6457	104

## Sheet: Figure 5D
	Time VLP	average siglec-1 molecules per spot iDC (normalised to average at 5 min)
		cell 1	cell 2	cell 3	cell 4	cell 5	cell 6	cell 7	cell 8	cell 9	cell 10	average	SD
	30 min	0.941823	0.640442	1.18429	0.90077	1.13681	0.993929	0.83966	0.644288	0.841842	0.892104	0.901596	0.178666
	60 min	1.5722	1.41438	1.43053	1.59083	0.895108	0.951753	1.38796	1.07093	1.29186	1.31026	1.29158	0.243512
	Time VLP	average siglec-1 molecules per spot mDC (normalised to average at 5 min)
		cell 1	cell 2	cell 3	cell 4	cell 5	cell 6	cell 7	cell 8	cell 9	cell 10	average	SD
	30 min	1.49019	1.31375	1.20736	1.54494	1.84375	1.46132	1.19543	1.43204	1.14585	1.33413	1.39688	0.207116
	60 min	1.68187	1.65238	1.46948	1.38679	1.34804	1.81588	1.8995	1.23492	1.71738	1.61338	1.58196	0.214919
	Table Analyzed (Two way ANOVA)							Bonferroni multiple comparisons
								Compare each cell mean with the other cell mean in that column
	Two-way ANOVA	Ordinary
	Alpha	0.05						Number of families	1
								Number of comparisons per family	2
	Source of Variation	% of total variation	P value	P value summary	Significant?			Alpha	0.05
	Interaction	2.562	0.1358	ns	No
	Time	20.18	0.0001	***	Yes			Bonferroni's multiple comparisons test	Mean Diff,	95,00% CI of diff,	Below threshold?	Summary	Adjusted P Value
	Cell type	37.66	<0,0001	****	Yes
								5 min - 30 min
	ANOVA table	SS	DF	MS	F (DFn, DFd)	P value		Idc	-0.39	-0,6121 to -0,1679	Yes	***	0.0004
	Interaction	0.105	1	0.105	F (1, 36) = 2,329	P=0,1358		mdc	-0.1851	-0,4072 to 0,03701	No	ns	0.1182
	Time	0.8268	1	0.8268	F (1, 36) = 18,34	P=0,0001
	Cell type	1.543	1	1.543	F (1, 36) = 34,23	P<0,0001
	Residual	1.623	36	0.04508				Test details	Mean 1	Mean 2	Mean Diff,	SE of diff,	N1	N2	t	DF
	Difference between column means							5 min - 30 min
	Mean of Idc	1.097						Idc	0.9016	1.292	-0.39	0.09495	10	10	4.107	36
	Mean of mdc	1.489						mdc	1.397	1.582	-0.1851	0.09495	10	10	1.949	36
	Difference between means	-0.3928
	SE of difference	0.06714						Bonferroni multiple comparisons
	95% CI of difference	-0,5290 to -0,2567						Compare each cell mean with the other cell mean in that row
	Difference between row means							Number of families	1
	Mean of 5 min	1.149						Number of comparisons per family	2
	Mean of 30 min	1.437						Alpha	0.05
	Difference between means	-0.2875
	SE of difference	0.06714						Bonferroni's multiple comparisons test	Mean Diff,	95,00% CI of diff,	Below threshold?	Summary	Adjusted P Value
	95% CI of difference	-0,4237 to -0,1514
								Idc - mdc
	Interaction CI							5 min	-0.4953	-0,7174 to -0,2732	Yes	****	<0,0001
	Mean diff, A1 - B1	-0.4953						30 min	-0.2904	-0,5125 to -0,06829	Yes	**	0.0084
	Mean diff, A2 - B2	-0.2904
	(A1 -B1) - (A2 - B2)	-0.2049
	95% CI of difference	-0,4772 to 0,06743						Test details	Mean 1	Mean 2	Mean Diff,	SE of diff,	N1	N2	t	DF
	(B1 - A1) - (B2 - A2)	0.2049
	95% CI of difference	-0,06743 to 0,4772						Idc - mdc
								5 min	0.9016	1.397	-0.4953	0.09495	10	10	5.216	36
	Data summary							30 min	1.292	1.582	-0.2904	0.09495	10	10	3.058	36
	Number of columns (Cell type)	2
	Number of rows (Time)	2
	Number of values	40

## Sheet: Figure 5E
	Accumulated VLP Intensity in iDC (5 min)														Accumulated VLP Intensity in iDC (30 min)												Accumulated VLP Intensity in iDC (60 min)
	Distance from centre of mass	cell 1	cell 2	cell 3	cell 4	cell 5	cell 6	cell 7	cell 8	cell 9	cell 10	average	SD		Distance from centre of mass	cell 1	cell 2	cell 3	cell 4	cell 5	cell 6	cell 7	cell 8	average	SD		Distance from centre of mass	cell 1	cell 2	cell 3	cell 4	cell 5	cell 6	cell 7	cell 8	cell 9	cell 10	average	SD
	0	0	2.44665e-10	1.6131e-05	3.50761e-55	9.3421e-07	6.76709e-08	0.00152723	0.00331614	7.12914e-05	5.41247e-05	0.000498592	0.00109806		0	1.06765e-05	2.89411e-05	9.57125e-05	0.00233782	0.00429325	0.0233136	0.00141843	0.000773628	0.004034	0.00792694		0	0.000343608	1.83478e-09	0.000151057	0.000522008	0.000140343	0.0640407	0.000128557	0.000636926	1.14793e-06	0.0374026	0.0103367	0.0221925
	0.789474	0.789474	6.62442e-09	8.70391e-05	1.34395e-46	1.28207e-05	6.71891e-07	0.00360444	0.0086063	0.000291212	0.000226639	0.0802303	0.249218		0.789474	6.06687e-05	0.00026489	0.000474514	0.00501819	0.00907632	0.0359721	0.00432439	0.00161105	0.00710027	0.0120703		0.789474	0.0017492	5.49175e-08	0.000662209	0.00198893	0.000493036	0.124526	0.000587141	0.00181836	6.91052e-06	0.0830773	0.021491	0.044474
	1.57895	1.57895	1.79359e-07	0.000469493	5.14939e-38	0.000175918	6.67104e-06	0.00848291	0.0221444	0.00118874	0.000948488	0.161236	0.498182		1.57895	0.000344665	0.00241981	0.00234898	0.0107386	0.0190851	0.0551182	0.0131057	0.0033519	0.0133141	0.0181026		1.57895	0.00885356	1.64375e-06	0.00289802	0.00754699	0.00173051	0.228087	0.00267719	0.00517972	4.15999e-05	0.174348	0.0431365	0.0843236
	2.36842	2.36842	4.85622e-06	0.00252815	1.97301e-29	0.00240886	6.62315e-05	0.0198327	0.055756	0.00483914	0.00396017	0.245782	0.746018		2.36842	0.00195547	0.0217242	0.0115424	0.0228302	0.0396851	0.0835763	0.03902	0.00696078	0.0284118	0.0261951		2.36842	0.0435509	4.91975e-05	0.0125878	0.0281983	0.00605479	0.380011	0.012117	0.0146624	0.00025038	0.329561	0.0827042	0.144479
	3.15789	3.15789	0.000131468	0.0134899	7.55963e-21	0.0320763	0.000657209	0.0456679	0.133285	0.019481	0.0163752	0.341906	0.990231		3.15789	0.0110112	0.168938	0.0547406	0.0478777	0.0806753	0.124798	0.110442	0.0143991	0.0766102	0.0554009		3.15789	0.188337	0.00147044	0.0529612	0.099684	0.0209539	0.559004	0.0530713	0.0407848	0.00150539	0.532955	0.155073	0.213226
	3.94737	3.94737	0.00354719	0.0686548	2.8965e-12	0.31271	0.00648693	0.101665	0.285335	0.0750899	0.0651214	0.486598	1.22103		3.94737	0.0594957	0.650263	0.223074	0.0976579	0.157018	0.18233	0.275167	0.02955	0.209319	0.19627		3.94737	0.541416	0.0422044	0.197069	0.297013	0.0698923	0.72263	0.203885	0.108268	0.00899436	0.724687	0.291606	0.274317
	4.73684	4.73684	0.0877905	0.283496	0.00110857	0.862668	0.0608548	0.211121	0.506976	0.249186	0.225166	0.722521	1.43247		4.73684	0.264233	0.94407	0.587088	0.188923	0.283143	0.258597	0.537229	0.0596788	0.39037	0.283236		4.73684	0.856328	0.566602	0.519114	0.617215	0.208366	0.840966	0.539267	0.257097	0.0518026	0.856829	0.531359	0.283967
	5.52632	5.52632	0.714625	0.674852	0.999998	0.989468	0.390402	0.387544	0.72186	0.576104	0.544956	1.15261	1.55108		5.52632	0.669889	0.993083	0.874972	0.333903	0.455294	0.353082	0.780262	0.116833	0.572165	0.304131		5.52632	0.966615	0.968753	0.827383	0.860268	0.477642	0.912825	0.842609	0.495297	0.247392	0.929485	0.752827	0.252061
	6.31579	6.31579	0.970577	0.906845	1	1.00018	0.858807	0.599294	0.861854	0.848594	0.824582	1.41865	1.72459		6.31579	0.917853	0.998747	0.970974	0.518928	0.637847	0.46079	0.915751	0.21616	0.704631	0.28896		6.31579	0.991668	0.992283	0.956945	0.959265	0.755439	0.951927	0.960904	0.732841	0.663579	0.964547	0.89294	0.124044
	7.10526	7.10526	0.983588	0.968548	1	1.00097	0.97685	0.779343	0.931051	0.959694	0.939714	1.5645	1.94788		7.10526	0.981804	0.999369	0.99294	0.698851	0.786241	0.572521	0.970889	0.365076	0.795961	0.236167		7.10526	0.996736	0.993089	0.992376	0.989094	0.905253	0.971942	0.991363	0.880596	0.920936	0.980401	0.962179	0.0430273
	7.89474	7.89474	0.984075	0.980916	1	1.00103	0.990563	0.89275	0.960608	0.991464	0.972123	1.66683	2.18849		7.89474	0.993992	0.999437	0.99749	0.833049	0.882935	0.677639	0.990391	0.545331	0.865033	0.171807		7.89474	0.997736	0.993116	1.00082	0.997221	0.959392	0.981867	0.998289	0.947426	0.984352	0.987358	0.984758	0.017911
	8.68421	8.68421	0.984093	0.983243	1	1.00103	0.991965	0.95128	0.972439	0.999563	0.980195	1.7548	2.43479		8.68421	0.996168	0.999445	0.998413	0.914653	0.937189	0.767829	0.996941	0.714626	0.915658	0.113193		8.68421	0.997933	0.993116	1.00277	0.999373	0.976001	0.98671	0.999818	0.973267	0.995742	0.990371	0.99151	0.0100943
	9.47368	9.47368	0.984094	0.983676	1	1.00103	0.992107	0.978402	0.97705	1.00157	0.982142	1.83738	2.68314		9.47368	0.996552	0.999445	0.998599	0.958266	0.965105	0.839292	0.999102	0.8397	0.949508	0.0697974		9.47368	0.997971	0.993116	1.00321	0.999938	0.980832	0.989056	1.00015	0.982644	0.99766	0.991668	0.993625	0.00759246
	10.2632	10.2632	0.984094	0.983756	1	1.00103	0.992121	0.990341	0.978829	1.00206	0.982609	1.9178	2.93227		10.2632	0.996619	0.999445	0.998636	0.979977	0.97883	0.892429	0.999811	0.916678	0.970303	0.0419551		10.2632	0.997979	0.993116	1.00332	1.00009	0.982216	0.990187	1.00023	0.985967	0.997979	0.992225	0.99433	0.00679085
	11.0526	11.0526	0.984094	0.983771	1	1.00103	0.992123	0.995477	0.979513	1.00218	0.98272	1.99735	3.18171		11.0526	0.996631	0.999445	0.998644	0.990403	0.985426	0.930102	1.00004	0.958852	0.982443	0.0251594		11.0526	0.99798	0.993116	1.00334	1.00013	0.98261	0.990732	1.00024	0.987135	0.998032	0.992464	0.994578	0.00652469
	11.8421	11.8421	0.984094	0.983773	1	1.00103	0.992123	0.997665	0.979775	1.00221	0.982746	2.07655	3.43128		11.8421	0.996633	0.999445	0.998645	0.995323	0.988562	0.955917	1.00012	0.980497	0.989393	0.01507		11.8421	0.99798	0.993116	1.00334	1.00014	0.982723	0.990994	1.00025	0.987545	0.998041	0.992567	0.994669	0.00643255
	12.6316	12.6316	0.984094	0.983774	1	1.00103	0.992123	0.998593	0.979875	1.00221	0.982753	2.1556	3.68089		12.6316	0.996633	0.999445	0.998646	0.997625	0.990045	0.973198	1.00014	0.991232	0.993371	0.00895959		12.6316	0.99798	0.993116	1.00335	1.00014	0.982755	0.99112	1.00025	0.987688	0.998042	0.992611	0.994704	0.00639947
	13.4211	13.4211	0.984094	0.983774	1	1.00103	0.992123	0.998986	0.979914	1.00222	0.982754	2.23459	3.93053		13.4211	0.996634	0.999445	0.998646	0.998698	0.990745	0.984585	1.00015	0.996467	0.995671	0.00535953		13.4211	0.997981	0.993116	1.00335	1.00014	0.982764	0.991181	1.00025	0.987738	0.998042	0.99263	0.994718	0.00638718
	14.2105	14.2105	0.984094	0.983774	1	1.00103	0.992123	0.999152	0.979928	1.00222	0.982755	2.31356	4.18018		14.2105	0.996634	0.999445	0.998646	0.999198	0.991075	0.99201	1.00015	0.998999	0.99702	0.00353764		14.2105	0.997981	0.993116	1.00335	1.00014	0.982766	0.99121	1.00025	0.987756	0.998043	0.992638	0.994724	0.00638247
	15	15	0.984094	0.983774	1	1.00103	0.992123	0.999223	0.979934	1.00222	0.982755	2.39252	4.42983		15	0.996634	0.999445	0.998646	0.99943	0.99123	0.99682	1.00016	1.00022	0.997822	0.00299896		15	0.997981	0.993116	1.00335	1.00014	0.982767	0.991224	1.00025	0.987762	0.998043	0.992641	0.994727	0.00638059
	Distance from cell centre at which we have 50% of total VLP Intensity
	cell nº	5 min	30 min	60 min
	1	5.293	3.865	5.718
	2	5.16	4.671	4.561
	3	5.009	4.7	5.2
	4	4.185	4.455	3.726
	5	5.675	5.561	4.562
	6	5.945	2.881	6.237
	7	4.68	4.655	5.697
	8	5.357	5.522	6.611
	9	5.406	6.014	4.632
	10		3.02	7.702
	average	5.19	4.5344	5.4646
	SD	0.523712	1.0414	1.17625
	Table Analyzed (Kruskal-Wallis test)
	Kruskal-Wallis test
	P value	0.2463
	Exact or approximate P value?	Approximate
	P value summary	ns
	Do the medians vary signif. (P < 0.05)?	No
	Number of groups	3
	Kruskal-Wallis statistic	2.803
	Data summary
	Number of treatments (columns)	3
	Number of values (total)	29
	Table Analyzed (Dunn's multiple comparison test)
	Number of families	1
	Number of comparisons per family	3
	Alpha	0.05
	Dunn's multiple comparisons test	Mean rank diff,	Significant?	Summary	Adjusted P Value
	iDC 60min vs. iDC 30min	-6	No	ns	0.3453	D-E
	iDC 60min vs. iDC 5min	-4.933	No	ns	0.6219	D-F
	iDC 30min vs. iDC 5min	1.067	No	ns	>0,9999	E-F
	Test details	Mean rank 1	Mean rank 2	Mean rank diff,	n1	n2	Z
	iDC 60min vs. iDC 30min	11.4	17.4	-6	10	10	1.576
	iDC 60min vs. iDC 5min	11.4	16.33	-4.933	10	9	1.261
	iDC 30min vs. iDC 5min	17.4	16.33	1.067	10	9	0.2726

## Sheet: Figure 5F
	Accumulated VLP Intensity in mDC (5 min)													Accumulated VLP Intensity in mDC (30 min)														Accumulated VLP Intensity in mDC (60 min)
	Distance from centre of mass	cell 1	cell 2	cell 3	cell 4	cell 5	cell 6	cell 7	cell 8	cell 9	average	SD		Distance from centre of mass	cell 1	cell 2	cell 3	cell 4	cell 5	cell 6	cell 7	cell 8	cell 9	cell 10	average	SD		Distance from centre of mass	cell 1	cell 2	cell 3	cell 4	cell 5	cell 6	cell 7	cell 8	cell 9	cell 10	average	SD
	0	0.00368485	0.000195662	0.00109287	0.0100957	5.90388e-08	0.000486605	0.00458776	6.92651e-06	4.68476e-07	0.00223899	0.00340772		0	0.00279809	2.17013e-10	1.46036e-06	0.00769437	0.00498917	2.54585e-22	0.0172142	6.80574e-05	0.00166129	0.00137473	0.00358013	0.00542353		0	0.000986256	7.42851e-11	0.00503915	6.797e-05	0.00115216	9.5417e-06	0.00010217	0.00010217	2.70621e-06	0.00350539	0.00109675	0.00176314
	0.789474	0.0111803	0.00284281	0.00451952	0.0219131	1.82972e-06	0.00457531	0.0165722	0.000157414	8.84207e-06	0.00686348	0.00794765		0.789474	0.0191172	8.34413e-08	5.61593e-05	0.0381616	0.0280708	7.59543e-14	0.0720197	0.00211492	0.0185868	0.0168536	0.0194981	0.0226785		0.789474	0.420398	0.0152623	0.526196	0.00232598	0.0166399	0.313977	0.00635841	0.00635841	4.96716e-05	0.0284872	0.133605	0.204152
	1.57895	0.0334131	0.0398653	0.01849	0.0468992	5.67035e-05	0.0415916	0.0580301	0.00356579	0.000166861	0.0268976	0.0219256		1.57895	0.119215	3.20821e-05	0.00215523	0.168677	0.142644	2.26601e-05	0.255796	0.0619109	0.177303	0.175878	0.110363	0.0899687		1.57895	0.997158	1	0.989786	0.0740456	0.198855	0.99992	0.286102	0.286102	0.000910963	0.196384	0.502926	0.433563
	2.36842	0.0956014	0.375946	0.0724779	0.0974964	0.00175437	0.290728	0.183738	0.0752161	0.00313999	0.1329	0.127586		2.36842	0.484237	0.0121856	0.076696	0.508537	0.489565	0.999852	0.603052	0.672671	0.71001	0.7259	0.528271	0.297211		2.36842	0.999023	1	0.993751	0.733143	0.784299	0.999965	0.961756	0.961756	0.0164609	0.670343	0.81205	0.306136
	3.15789	0.244397	0.892333	0.244536	0.191555	0.0516544	0.795354	0.450826	0.648589	0.0561049	0.397261	0.315129		3.15789	0.86595	0.825812	0.761803	0.838785	0.847363	1	0.869385	0.984598	0.96467	0.969329	0.89277	0.0808562		3.15789	0.999025	1	0.993769	0.990098	0.981217	0.999965	0.999444	0.999444	0.234996	0.943512	0.914147	0.23926
	3.94737	0.497884	0.985226	0.571427	0.341508	0.628126	0.974518	0.74832	0.975872	0.527777	0.694518	0.238644		3.94737	0.976802	0.999353	0.992286	0.960698	0.970508	1	0.96562	0.999482	0.99606	0.996155	0.985696	0.0155601		3.94737	0.999025	1	0.993769	1.00032	0.998303	0.999965	1.00007	1.00007	0.849184	0.992007	0.983271	0.0472036
	4.73684	0.75355	0.992317	0.842976	0.530532	0.9816	0.998339	0.913109	0.998029	0.951669	0.88468	0.156683		4.73684	0.995142	0.999899	1.00015	0.988781	0.995629	1	0.990359	0.999967	0.998916	0.998374	0.996722	0.00418898		4.73684	0.999025	1	0.993769	1.00062	0.99949	0.999965	1.00008	1.00008	0.990173	0.998161	0.998137	0.00342623
	5.52632	0.905683	0.992808	0.951992	0.70919	0.999753	1.00093	0.971626	0.999026	0.993966	0.947219	0.0946004		5.52632	0.997839	0.999901	1.00036	0.994462	1.00012	1	0.996117	0.999983	0.999168	0.998552	0.998651	0.00197624		5.52632	0.999025	1	0.993769	1.00063	0.999571	0.999965	1.00008	1.00008	0.999211	0.998905	0.999124	0.00195814
	6.31579	0.969725	0.992841	0.982614	0.837563	1.00035	1.00121	0.988959	0.99907	0.996312	0.974293	0.0522571		6.31579	0.998229	0.999901	1.00037	0.995579	1.00091	1	0.997426	0.999983	0.99919	0.998567	0.999015	0.00160823		6.31579	0.999025	1	0.993769	1.00063	0.999576	0.999965	1.00008	1.00008	0.999709	0.998994	0.999183	0.00196589
	7.10526	0.992687	0.992844	0.99029	0.912761	1.00037	1.00123	0.993807	0.999072	0.996436	0.986611	0.0279504		7.10526	0.998285	0.999901	1.00037	0.995798	1.00104	1	0.997722	0.999983	0.999192	0.998568	0.999086	0.00154091		7.10526	0.999025	1	0.993769	1.00063	0.999577	0.999965	1.00008	1.00008	0.999736	0.999005	0.999187	0.00196661
	7.89474	1.00044	0.992844	0.992158	0.951649	1.00037	1.00124	0.995141	0.999072	0.996443	0.99215	0.0155519		7.89474	0.998293	0.999901	1.00037	0.995841	1.00107	1	0.997789	0.999983	0.999192	0.998568	0.9991	0.0015272		7.89474	0.999025	1	0.993769	1.00063	0.999577	0.999965	1.00008	1.00008	0.999737	0.999006	0.999187	0.00196665
	8.68421	1.003	0.992844	0.992609	0.970468	1.00037	1.00124	0.995507	0.999072	0.996443	0.994616	0.0097564		8.68421	0.998294	0.999901	1.00037	0.995849	1.00107	1	0.997804	0.999983	0.999192	0.998568	0.999103	0.00152431		8.68421	0.999025	1	0.993769	1.00063	0.999577	0.999965	1.00008	1.00008	0.999737	0.999006	0.999187	0.00196665
	9.47368	1.00384	0.992844	0.992718	0.979281	1.00037	1.00124	0.995607	0.999072	0.996443	0.995712	0.00722194		9.47368	0.998294	0.999901	1.00037	0.995851	1.00107	1	0.997807	0.999983	0.999192	0.998568	0.999103	0.0015237		9.47368	0.999025	1	0.993769	1.00063	0.999577	0.999965	1.00008	1.00008	0.999737	0.999006	0.999187	0.00196665
	10.2632	1.00411	0.992844	0.992744	0.983346	1.00037	1.00124	0.995634	0.999072	0.996443	0.9962	0.0061486		10.2632	0.998294	0.999901	1.00037	0.995851	1.00107	1	0.997808	0.999983	0.999192	0.998568	0.999104	0.00152356		10.2632	0.999025	1	0.993769	1.00063	0.999577	0.999965	1.00008	1.00008	0.999737	0.999006	0.999187	0.00196665
	11.0526	1.0042	0.992844	0.99275	0.985207	1.00037	1.00124	0.995642	0.999072	0.996443	0.996419	0.00569001		11.0526	0.998294	0.999901	1.00037	0.995851	1.00107	1	0.997808	0.999983	0.999192	0.998568	0.999104	0.00152353		11.0526	0.999025	1	0.993769	1.00063	0.999577	0.999965	1.00008	1.00008	0.999737	0.999006	0.999187	0.00196665
	11.8421	1.00423	0.992844	0.992752	0.986057	1.00037	1.00124	0.995644	0.999072	0.996443	0.996517	0.00548911		11.8421	0.998294	0.999901	1.00037	0.995851	1.00107	1	0.997808	0.999983	0.999192	0.998568	0.999104	0.00152353		11.8421	0.999025	1	0.993769	1.00063	0.999577	0.999965	1.00008	1.00008	0.999737	0.999006	0.999187	0.00196665
	12.6316	1.00424	0.992844	0.992752	0.986444	1.00037	1.00124	0.995644	0.999072	0.996443	0.996561	0.00539932		12.6316	0.998294	0.999901	1.00037	0.995851	1.00107	1	0.997808	0.999983	0.999192	0.998568	0.999104	0.00152353		12.6316	0.999025	1	0.993769	1.00063	0.999577	0.999965	1.00008	1.00008	0.999737	0.999006	0.999187	0.00196665
	13.4211	1.00424	0.992844	0.992752	0.98662	1.00037	1.00124	0.995645	0.999072	0.996443	0.996581	0.00535875		13.4211	0.998294	0.999901	1.00037	0.995851	1.00107	1	0.997808	0.999983	0.999192	0.998568	0.999104	0.00152353		13.4211	0.999025	1	0.993769	1.00063	0.999577	0.999965	1.00008	1.00008	0.999737	0.999006	0.999187	0.00196665
	14.2105	1.00425	0.992844	0.992752	0.9867	1.00037	1.00124	0.995645	0.999072	0.996443	0.99659	0.00534032		14.2105	0.998294	0.999901	1.00037	0.995851	1.00107	1	0.997808	0.999983	0.999192	0.998568	0.999104	0.00152353		14.2105	0.999025	1	0.993769	1.00063	0.999577	0.999965	1.00008	1.00008	0.999737	0.999006	0.999187	0.00196665
	15	1.00425	0.992844	0.992752	0.986737	1.00037	1.00124	0.995645	0.999072	0.996443	0.996594	0.00533193		15	0.998294	0.999901	1.00037	0.995851	1.00107	1	0.997808	0.999983	0.999192	0.998568	0.999104	0.00152353		15	0.999025	1	0.993769	1.00063	0.999577	0.999965	1.00008	1.00008	0.999737	0.999006	0.999187	0.00196665
	Distance from cell centre at which we have 50% of total VLP Intensity
	cell nº	5min	30 min	60 min
	1	3.959	2.393	0.8277
	2	2.514	2.951	0.9612
	3	3.778	2.907	0.7722
	4	4.586	2.348	2.143
	5	3.827	2.388	1.988
	6	2.683	2.012	1.753
	7	3.273	2.144	1.753
	8	3.002	2.203	3.478
	9	3.915	2.077	2.103
	10		2.062
	average	3.50411	2.3485	1.75323
	SD	0.678747	0.335077	0.847831
	Table Analyzed (Kruskal-Wallis test)
	Kruskal-Wallis test
	P value	0.0002
	Exact or approximate P value?	Approximate
	P value summary	***
	Do the medians vary signif. (P < 0.05)?	Yes
	Number of groups	3
	Kruskal-Wallis statistic	17.12
	Data summary
	Number of treatments (columns)	3
	Number of values (total)	28
	Table Analyzed (Dunn's multiple comparison test)
	Number of families	1
	Number of comparisons per family	3
	Alpha	0.05
	Dunn's multiple comparisons test	Mean rank diff,	Significant?	Summary	Adjusted P Value
	mDC 60 min vs. mDC 30min	-6.078	No	ns	0.3233	A-B
	mDC 60 min vs. mDC 5min	-15.89	Yes	***	0.0001	A-C
	mDC 30min vs. mDC 5min	-9.811	Yes	*	0.0283	B-C
	Test details	Mean rank 1	Mean rank 2	Mean rank diff,	n1	n2	Z
	mDC 60 min vs. mDC 30min	7.222	13.3	-6.078	9	10	1.608
	mDC 60 min vs. mDC 5min	7.222	23.11	-15.89	9	9	4.098
	mDC 30min vs. mDC 5min	13.3	23.11	-9.811	10	9	2.596

## Sheet: Figure 5G
	LUVs 4% GM-1	average siglec-1 molecules per spot mDC (normalised to average at 5 min)
	Time	cell 1	cell 2	cell 3	cell 4	cell 5	cell 6	cell 7	cell 8	cell 9	cell 10	cell 11	cell 12	cell 13	cell 14	cell 15	average	SD
	30 min	1.35763	1.65278	1.47094	0.728954	0.870432	1.37422	1.4728	1.32493	1.18876	1.31869	1.42384	1.7014	1.73162	1.59586		1.37235	0.290006
	60 min	1.41566	1.8005	1.31756	2.10704	1.5106	1.73374	0.974891	1.19406	1.44447	1.32612	1.98784	1.30971	1.40403	1.74858	1.23666	1.50076	0.312951
	LUVs 0.5 % GM-1	average siglec-1 molecules per spot mDC (normalised to average at 5 min)
	Time	cell 1	cell 2	cell 3	cell 4	cell 5	cell 6	cell 7	cell 8	cell 9	cell 10	cell 11	cell 12	cell 13	cell 14	cell 15	cell 16	average	SD
	30 min	1.32362	1.20693	0.75964	1.21931	0.912555	0.508735	1.01263	1.50108	1.31865	0.512292	0.9602	0.732537	1.33139	0.644587	0.727232	0.786042	0.96609	0.316659
	60 min	1.3611	1.40661	1.44795	1.40291	1.45791	1.2282	1.54882	1.28132	1.28331	1.15894	1.26439	1.09419	0.936346				1.29785	0.167312
	Table Analyzed (Two way ANOVA)							Bonferroni multiple comparisons
								Compare each cell mean with the other cell mean in that column
	Two-way ANOVA	Ordinary
	Alpha	0.05						Number of families	1
								Number of comparisons per family	2
	Source of Variation	% of total variation	P value	P value summary	Significant?			Alpha	0.05
	Interaction	2.212	0.1772	ns	No
	Time	11.33	0.0031	**	Yes			Bonferroni's multiple comparisons test	Predicted (LS) mean diff,	95,00% CI of diff,	Below threshold?	Summary	Adjusted P Value
	GM-1 concentration	19.85	0.0001	***	Yes
								30 min - 60 min
	ANOVA table	SS (Type III)	DF	MS	F (DFn, DFd)	P value		4%	-0.1284	-0,3703 to 0,1135	No	ns	0.4526
	Interaction	0.149	1	0.149	F (1, 54) = 1,869	P=0,1772		0.5%	-0.3318	-0,5748 to -0,08869	Yes	**	0.0054
	Time	0.763	1	0.763	F (1, 54) = 9,572	P=0,0031
	GM-1 concentration	1.337	1	1.337	F (1, 54) = 16,78	P=0,0001
	Residual	4.304	54	0.07971				Test details	Predicted (LS) mean 1	Predicted (LS) mean 2	Predicted (LS) mean diff,	SE of diff,	N1	N2	t	DF
	Difference between column means							30 min - 60 min
	Predicted (LS) mean of 4%	1.437						4%	1.372	1.501	-0.1284	0.1049	14	15	1.224	54
	Predicted (LS) mean of 0.5%	1.132						0.5%	0.9661	1.298	-0.3318	0.1054	16	13	3.147	54
	Difference between predicted means	0.3046
	SE of difference	0.07437						Bonferroni multiple comparisons
	95% CI of difference	0,1555 to 0,4537						Compare each cell mean with the other cell mean in that row
	Difference between row means							Number of families	1
	Predicted (LS) mean of 5 min	1.169						Number of comparisons per family	2
	Predicted (LS) mean of 30 min	1.399						Alpha	0.05
	Difference between predicted means	-0.2301
	SE of difference	0.07437						Bonferroni's multiple comparisons test	Predicted (LS) mean diff,	95,00% CI of diff,	Below threshold?	Summary	Adjusted P Value
	95% CI of difference	-0,3792 to -0,08099
								4% - 0.5%
	Interaction CI							30 min	0.4063	0,1680 to 0,6445	Yes	***	0.0005
	Mean diff, A1 - B1	0.4063						60 min	0.2029	-0,04375 to 0,4496	No	ns	0.1264
	Mean diff, A2 - B2	0.2029
	(A1 -B1) - (A2 - B2)	0.2033
	95% CI of difference	-0,09485 to 0,5015						Test details	Predicted (LS) mean 1	Predicted (LS) mean 2	Predicted (LS) mean diff,	SE of diff,	N1	N2	t	DF
	(B1 - A1) - (B2 - A2)	-0.2033
	95% CI of difference	-0,5015 to 0,09485						4% - 0.5%
								30 min	1.372	0.9661	0.4063	0.1033	14	16	3.932	54
	Data summary							60 min	1.501	1.298	0.2029	0.107	15	13	1.897	54
	Number of columns (GM-1 concentration)	2
	Number of rows (Time)	2
	Number of values	58

## Sheet: Figure 5H
	4% GM-1 LUVs	Accumulated LUV Intensity in mDC (60 min)															4% GM-1 LUVs	Accumulated LUV Intensity in mDC (30 min)										4% GM-1 LUVs	Accumulated LUV Intensity in mDC (5 min)
	Distance from centre of mass	cell 1	cell 2	cell 3	cell 4	cell 5	cell 6	cell 7	cell 8	cell 9	cell 10	cell 11	cell 12	average	SD		Distance from centre of mass	cell 1	cell 2	cell 3	cell 4	cell 5	cell 6	cell 7	average	SD		Distance from centre of mass	cell 1	cell 2	cell 3	cell 4	cell 5	cell 6	cell 7	cell 8	cell 9	cell 10	cell 11	cell 12	cell 13	cell 14	cell 15	average	SD
	0	0.00356918	0.00410396	0.00413109	0.00507944	0.00907925	0.00590626	0.000193188	0.000117302	0.00668173	0.0013143	0.00116162	0.000661431	0.00349989	0.00287599		0	0.00129994	0.000557538	0.00182984	0.0151243	1.96121e-05	0.0355218	0.0107512	0.0093006	0.0129484		0	0.0104227	0.000392697	9.51987e-08	1.56538e-10	0.00623844	0.00837092	2.45688e-05	0.00643919	0.00013013	0.000670143	0.000276881	0.000521519	3.43692e-05	0.0044585	0.0114241	0.00329362	0.00420652
	0.789474	0.0138508	0.0190751	0.020053	0.0182592	0.0211807	0.0201876	0.000589642	0.000469212	0.0218838	0.00470974	0.00565462	0.00397263	0.0124905	0.00865837		0.789474	0.00799281	0.00464757	0.00730055	0.0256158	0.000109334	0.066587	0.021909	0.019166	0.0228672		0.789474	0.0172782	0.000875199	6.81717e-07	2.48368e-09	0.0130773	0.0139331	9.11505e-05	0.0103226	0.000366488	0.00139329	0.000613999	0.00120294	0.000110827	0.00798283	0.0181961	0.00569631	0.00698483
	1.57895	0.0521411	0.0838388	0.0915026	0.0633334	0.048602	0.0666388	0.00179816	0.0018749	0.0691659	0.0167278	0.0270462	0.0234529	0.0455102	0.0307959		1.57895	0.0474914	0.0375937	0.0286467	0.0430636	0.000609262	0.121348	0.0441269	0.0461256	0.0367961		1.57895	0.0285114	0.00194938	4.88176e-06	3.94068e-08	0.0272027	0.0231033	0.000338107	0.0165084	0.0010317	0.00289448	0.00136101	0.00277217	0.00035731	0.0142517	0.0288641	0.00994339	0.0117576
	2.36842	0.176589	0.298302	0.328984	0.196138	0.10753	0.197931	0.00546958	0.00746049	0.197156	0.0576085	0.119449	0.125823	0.151537	0.10199		2.36842	0.235439	0.245492	0.10561	0.0715142	0.00338732	0.210808	0.0868626	0.137016	0.0935845		2.36842	0.0466969	0.00433622	3.49572e-05	6.25239e-07	0.0557026	0.0380716	0.00125329	0.0263007	0.00290073	0.00600326	0.00301405	0.00637496	0.00115135	0.025313	0.045494	0.0175099	0.0200925
	3.15789	0.450995	0.650858	0.693787	0.461668	0.220908	0.458137	0.0165085	0.0292017	0.444044	0.179817	0.396345	0.456254	0.371544	0.217326		3.15789	0.652712	0.723425	0.319657	0.116449	0.0185951	0.340239	0.163847	0.333561	0.267468		3.15789	0.0755688	0.00961723	0.000250274	9.92013e-06	0.110579	0.0621094	0.00463403	0.0416505	0.00812738	0.0124088	0.00666115	0.0145893	0.00370335	0.0445567	0.0709979	0.0310309	0.0345563
	3.94737	0.746844	0.868119	0.894812	0.734352	0.39898	0.737719	0.0486944	0.107471	0.7119	0.438516	0.753534	0.808577	0.604126	0.28759		3.94737	0.914543	0.942667	0.645967	0.183963	0.0954906	0.498023	0.287442	0.509728	0.340866		3.94737	0.120018	0.0211923	0.00178944	0.000157372	0.20733	0.0997205	0.0169766	0.0653457	0.0225527	0.0254715	0.0146552	0.0330252	0.0118443	0.0772264	0.109148	0.0550969	0.0581194
	4.73684	0.896817	0.93415	0.950616	0.876324	0.60563	0.895208	0.134707	0.325501	0.869492	0.730967	0.92377	0.927399	0.755882	0.267697		4.73684	0.977912	0.978079	0.866402	0.278152	0.369699	0.654686	0.453352	0.65404	0.293658		4.73684	0.185308	0.046048	0.0126737	0.00249105	0.354072	0.156238	0.0601715	0.101071	0.0609642	0.0515568	0.0319281	0.0729763	0.0372076	0.130451	0.16414	0.0978198	0.0905429
	5.52632	0.945204	0.949442	0.96278	0.925395	0.775698	0.953914	0.319587	0.660248	0.931445	0.897403	0.968512	0.950577	0.85335	0.191626		5.52632	0.988982	0.982488	0.946942	0.39682	0.762345	0.781549	0.62968	0.784115	0.216857		5.52632	0.274879	0.0971483	0.0841493	0.0381032	0.532643	0.236209	0.191489	0.153063	0.154186	0.101531	0.0681225	0.15334	0.110746	0.211606	0.239317	0.176435	0.120338
	6.31579	0.958386	0.952744	0.965283	0.93983	0.880342	0.972295	0.580517	0.888636	0.951822	0.958068	0.9782	0.954535	0.915055	0.10966		6.31579	0.990793	0.983017	0.969402	0.528517	0.941742	0.868379	0.776134	0.865426	0.167167		6.31579	0.386902	0.193401	0.3961	0.385015	0.699827	0.340241	0.46501	0.224962	0.33725	0.190088	0.139318	0.293242	0.286077	0.323643	0.334973	0.33307	0.13486
	7.10526	0.961805	0.953447	0.965792	0.943868	0.933658	0.977726	0.7924	0.972725	0.95812	0.976425	0.980205	0.955195	0.947614	0.0508683		7.10526	0.991087	0.98308	0.975167	0.655601	0.983243	0.92119	0.874851	0.912031	0.120815		7.10526	0.511852	0.348056	0.82124	0.903426	0.822045	0.461716	0.756095	0.317677	0.582947	0.327293	0.263423	0.484911	0.561963	0.458823	0.446161	0.537842	0.202315
	7.89474	0.962681	0.953596	0.965895	0.944982	0.958223	0.979303	0.899979	0.996285	0.960028	0.981655	0.980616	0.955304	0.961545	0.0242914		7.89474	0.991134	0.983088	0.976614	0.76272	0.991077	0.951034	0.932385	0.94115	0.0816695		7.89474	0.634618	0.542677	0.966032	0.987204	0.89618	0.586883	0.909549	0.427022	0.786296	0.501149	0.44019	0.676466	0.80171	0.597757	0.562593	0.687755	0.189825
	8.68421	0.962904	0.953627	0.965916	0.945288	0.969015	0.979758	0.941856	1.00235	0.960603	0.983119	0.9807	0.955322	0.966705	0.0174273		8.68421	0.991142	0.983089	0.976976	0.843186	0.992495	0.967204	0.963114	0.959601	0.0525244		8.68421	0.74109	0.724316	0.990417	0.993008	0.936171	0.700286	0.962182	0.543185	0.897424	0.672959	0.631095	0.816139	0.923941	0.718888	0.671921	0.794868	0.145362
	9.47368	0.962961	0.953634	0.96592	0.945372	0.973657	0.97989	0.956431	1.00388	0.960776	0.983528	0.980718	0.955325	0.968508	0.016391		9.47368	0.991143	0.983089	0.977066	0.898555	0.99275	0.975765	0.978764	0.971019	0.032642		9.47368	0.823887	0.852246	0.993921	0.993376	0.956387	0.791667	0.977426	0.653663	0.944826	0.80572	0.784459	0.896315	0.969791	0.810255	0.764556	0.8679	0.102567
	10.2632	0.962975	0.953635	0.965921	0.945395	0.975635	0.979928	0.961303	1.00426	0.960828	0.983641	0.980721	0.955326	0.969131	0.0162662		10.2632	0.991143	0.983089	0.977088	0.934392	0.992796	0.980241	0.986541	0.977899	0.0199914		10.2632	0.882979	0.925561	0.994412	0.993399	0.96627	0.858595	0.981618	0.748214	0.96288	0.89012	0.880967	0.936159	0.984947	0.87192	0.836456	0.9143	0.0702459
	11.0526	0.962979	0.953636	0.965921	0.945401	0.976475	0.979938	0.96291	1.00436	0.960844	0.983673	0.980722	0.955326	0.969349	0.0162544		11.0526	0.991143	0.983089	0.977094	0.956677	0.992804	0.982568	0.990359	0.981962	0.0124966		11.0526	0.922617	0.962702	0.99448	0.9934	0.971024	0.904262	0.982754	0.822096	0.969456	0.937309	0.932693	0.954541	0.989744	0.910478	0.888556	0.942408	0.047548
	11.8421	0.96298	0.953636	0.965921	0.945403	0.976831	0.979942	0.963437	1.00438	0.960849	0.983681	0.980722	0.955326	0.969426	0.0162556		11.8421	0.991143	0.983089	0.977095	0.970193	0.992805	0.983772	0.992222	0.984331	0.00851072		11.8421	0.948112	0.980345	0.99449	0.9934	0.973292	0.933935	0.98306	0.875829	0.971812	0.961817	0.958051	0.962731	0.99124	0.933449	0.924458	0.959068	0.0320917
	12.6316	0.96298	0.953636	0.965921	0.945403	0.976982	0.979943	0.96361	1.00439	0.96085	0.983684	0.980722	0.955326	0.969454	0.0162575		12.6316	0.991143	0.983089	0.977096	0.978264	0.992805	0.984395	0.993128	0.985703	0.0067471		12.6316	0.964069	0.988469	0.994491	0.9934	0.974369	0.952608	0.983143	0.912901	0.972652	0.974058	0.969939	0.966323	0.991706	0.94674	0.948348	0.968881	0.0220024
	13.4211	0.96298	0.953636	0.965921	0.945404	0.977046	0.979943	0.963666	1.00439	0.96085	0.983685	0.980722	0.955326	0.969464	0.0162587		13.4211	0.991143	0.983089	0.977096	0.983041	0.992806	0.984717	0.993569	0.986494	0.00614414		13.4211	0.973888	0.992157	0.994491	0.9934	0.974881	0.964123	0.983165	0.937558	0.97295	0.980052	0.975395	0.967888	0.99185	0.954301	0.963879	0.974665	0.015847
	14.2105	0.96298	0.953636	0.965921	0.945404	0.977073	0.979943	0.963685	1.00439	0.960851	0.983685	0.980722	0.955326	0.969468	0.0162593		14.2105	0.991143	0.983089	0.977096	0.985853	0.992806	0.984883	0.993782	0.98695	0.0060006		14.2105	0.979865	0.993819	0.994492	0.9934	0.975123	0.971136	0.983171	0.95356	0.973056	0.98296	0.977874	0.968567	0.991895	0.958561	0.973822	0.978087	0.012446
	15	0.96298	0.953636	0.965921	0.945404	0.977084	0.979943	0.963691	1.00439	0.960851	0.983685	0.980722	0.955326	0.969469	0.0162596		15	0.991143	0.983089	0.977096	0.987503	0.992806	0.984969	0.993886	0.987213	0.00599643		15	0.983481	0.994567	0.994492	0.9934	0.975238	0.975374	0.983173	0.96378	0.973093	0.984363	0.978996	0.968862	0.991908	0.960948	0.980126	0.98012	0.010782
	Distance from cell centre at which we have 50% of total LUV Intensity
	cell nº	60 min	30 min	5 min
	1	4.305	3.085	6.997
	2	3.57	3.142	7.716
	3	4.749	4.067	6.481
	4	5.301	5.991	6.446
	5	5.358	5.052	5.331
	6	2.731	4.326	7.287
	7	6.041	5.636	6.381
	8	4.206		8.327
	9	4.514		6.799
	10	3.687		7.858
	11	4.263		8.097
	12			7.104
	13			6.925
	14			7.235
	15			7.438
	average	4.42955	4.47129	7.0948
	SD	0.927141	1.14576	0.765769
	Table Analyzed (Kruskal-Wallis test)
	Kruskal-Wallis test
	P value	<0,0001
	Exact or approximate P value?	Approximate
	P value summary	****
	Do the medians vary signif. (P < 0.05)?	Yes
	Number of groups	3
	Kruskal-Wallis statistic	22.43
	Data summary
	Number of treatments (columns)	3
	Number of values (total)	33
	Table Analyzed (Dunn's multiple comparison test)
	Number of families	1
	Number of comparisons per family	3
	Alpha	0.05
	Dunn's multiple comparisons test	Mean rank diff,	Significant?	Summary	Adjusted P Value
	mDC 60 min 4% vs. mDC 30min 4%	-0.2208	No	ns	>0,9999	A-B
	mDC 60 min 4% vs. mDC 5min 4%	-16.1	Yes	****	<0,0001	A-C
	mDC 30min 4% vs. mDC 5min 4%	-15.88	Yes	**	0.001	B-C
	Test details	Mean rank 1	Mean rank 2	Mean rank diff,	n1	n2	Z
	mDC 60 min 4% vs. mDC 30min 4%	9.636	9.857	-0.2208	11	7	0.04722
	mDC 60 min 4% vs. mDC 5min 4%	9.636	25.73	-16.1	11	15	4.194
	mDC 30min 4% vs. mDC 5min 4%	9.857	25.73	-15.88	7	15	3.587

## Sheet: Figure 5I
	0,5% GM-1 LUVs	Accumulated LUV Intensity in mDC (60 min)																0,5% GM-1 LUVs	Accumulated LUV Intensity in mDC (30 min)											0,5% GM-1 LUVs	Accumulated LUV Intensity in mDC (5 min)
	Distance from centre of mass	cell 1	cell 2	cell 3	cell 4	cell 5	cell 6	cell 7	cell 8	cell 9	cell 10	cell 11	cell 12	cell 13	average	SD		Distance from centre of mass	cell 1	cell 2	cell 3	cell 4	cell 5	cell 6	cell 7	cell 8	average	SD		Distance from centre of mass	cell 1	cell 2	cell 3	cell 4	cell 5	cell 6	cell 7	cell 8	cell 9	cell 10	cell 11	cell 12	cell 13	cell 14	average	SD
	0	0.000139541	1.5818e-06	0.0302118	0.00498629	4.83042e-05	0.000823561	0.0149527	0.000859346	0.00747911	0.0154305	9.72774e-05	0.000643091	2.29275e-05	0.00582278	0.00920299		0	5.7588e-07	1.08429e-05	2.622e-07	0.000123868	0.0011039	0.0133746	0.00082609	0.0031101	0.00231878	0.00458966		0	0.00544951	0.00252031	0.00014702	0.0495595	6.56283e-08	0.00202551	0.00118908	4.7923e-06	4.38825e-05	0.000888116	0.000290211	0.00603716	0.000251518	0.0131556	0.00582588	0.0131061
	0.789474	0.000613734	1.65087e-05	0.0480283	0.011772	0.00229645	0.00253508	0.127572	0.00525092	0.0313771	0.0269376	0.000288368	0.0024965	9.872e-05	0.0199449	0.0357126		0.789474	2.86438e-06	4.32268e-05	1.46516e-06	0.000384187	0.00241572	0.0297298	0.00201045	0.00595634	0.00506801	0.0101692		0.789474	0.00953096	0.00487592	0.00045986	0.0732805	1.08666e-06	0.00482265	0.00235424	2.03959e-05	0.000381548	0.001909	0.000678637	0.0113773	0.000735109	0.0248145	0.00966012	0.0195275
	1.57895	0.00269489	0.000172271	0.0754339	0.027536	0.0982691	0.0077753	0.578773	0.0312665	0.121305	0.0465649	0.000854511	0.00963964	0.000424958	0.0769777	0.156011		1.57895	1.4247e-05	0.000172312	8.18716e-06	0.00119092	0.00527765	0.0646831	0.00488443	0.0113769	0.010951	0.022062		1.57895	0.016616	0.00941272	0.0014374	0.106992	1.79922e-05	0.0114303	0.00465606	8.68002e-05	0.00330737	0.00409778	0.00158612	0.0213427	0.0021464	0.0462774	0.0163862	0.0288754
	2.36842	0.011748	0.00179492	0.116327	0.0630589	0.798712	0.0235872	0.913015	0.161733	0.362046	0.0791689	0.00252929	0.036469	0.00182736	0.197848	0.308993		2.36842	7.08596e-05	0.000686609	4.57476e-05	0.00368535	0.0114886	0.134627	0.0118177	0.0216205	0.0230053	0.0457377		2.36842	0.0288082	0.0180952	0.00448336	0.153469	0.000297818	0.0268033	0.00918877	0.000369322	0.0279316	0.00877047	0.00370262	0.0396966	0.00624937	0.0845468	0.0294581	0.042079
	3.15789	0.0496582	0.018409	0.174657	0.137892	0.939188	0.0692721	0.971061	0.504462	0.671004	0.131021	0.0074617	0.128237	0.00782195	0.293088	0.354013		3.15789	0.000352349	0.00273163	0.00025558	0.0113443	0.0248143	0.257823	0.0283102	0.0406987	0.0457913	0.0869385		3.15789	0.0494773	0.0345121	0.0138918	0.214932	0.00490578	0.0613356	0.0180581	0.00156999	0.193905	0.0186553	0.008619	0.0726972	0.0180466	0.149051	0.061404	0.0718996
	3.94737	0.186218	0.16273	0.252728	0.275354	0.942667	0.186277	0.977494	0.770205	0.836651	0.208035	0.0217999	0.363268	0.0328413	0.401251	0.348404		3.94737	0.00175006	0.0108004	0.00142645	0.0343634	0.0527179	0.432865	0.0662618	0.0752848	0.0844337	0.143666		3.94737	0.0836435	0.0648552	0.0421851	0.291884	0.0748408	0.133141	0.0351994	0.00664837	0.611958	0.0391686	0.0199331	0.129545	0.0509168	0.248113	0.130859	0.161819
	4.73684	0.496509	0.653954	0.348774	0.474228	0.94274	0.411903	0.978164	0.842463	0.887482	0.311538	0.0619478	0.687014	0.127694	0.555724	0.303825		4.73684	0.00864331	0.0416852	0.00791768	0.0993326	0.108281	0.618389	0.147306	0.135023	0.145822	0.198454		4.73684	0.137831	0.11865	0.120852	0.381894	0.538281	0.261097	0.0675493	0.0277036	0.813626	0.0800914	0.0454198	0.220605	0.135014	0.380432	0.237789	0.223133
	5.52632	0.7991	0.920063	0.455393	0.681198	0.942742	0.678372	0.978234	0.855531	0.90017	0.433421	0.163511	0.891235	0.387814	0.698983	0.260192		5.52632	0.0415351	0.14744	0.0426515	0.254319	0.208615	0.762873	0.295776	0.230068	0.24791	0.228097		5.52632	0.218374	0.207339	0.299136	0.479166	0.859854	0.436842	0.125949	0.108266	0.845665	0.155664	0.10017	0.350752	0.310258	0.527711	0.358939	0.249767
	6.31579	0.927565	0.957391	0.561057	0.83439	0.942742	0.858479	0.978241	0.857697	0.903166	0.556473	0.365762	0.964989	0.735981	0.803379	0.193196		6.31579	0.176807	0.405449	0.198433	0.511632	0.361448	0.850707	0.504437	0.363155	0.421508	0.212509		6.31579	0.327245	0.337394	0.566	0.575696	0.892039	0.608216	0.223385	0.341816	0.849511	0.277206	0.206659	0.509383	0.557893	0.661788	0.495302	0.218467
	7.10526	0.962737	0.961127	0.654632	0.921574	0.942742	0.939358	0.978242	0.858051	0.903864	0.662839	0.627574	0.985968	0.929843	0.871427	0.131575		7.10526	0.512155	0.722638	0.57289	0.759241	0.542966	0.896309	0.710003	0.519658	0.654482	0.138724		7.10526	0.456942	0.498711	0.791744	0.663716	0.89406	0.727725	0.36639	0.693134	0.849955	0.435051	0.378798	0.669124	0.767338	0.763274	0.639712	0.17836
	7.89474	0.971105	0.961487	0.729599	0.963945	0.942742	0.968964	0.978242	0.858109	0.904026	0.743125	0.827298	0.99151	0.990429	0.910045	0.0920023		7.89474	0.827827	0.899058	0.865004	0.89957	0.704389	0.918056	0.852597	0.669977	0.82956	0.0929572		7.89474	0.590092	0.661916	0.907413	0.737995	0.894182	0.792948	0.541179	0.913813	0.850006	0.591576	0.588257	0.801862	0.880365	0.829873	0.75582	0.135356
	8.68421	0.973027	0.961521	0.784979	0.982956	0.942742	0.978969	0.978242	0.858118	0.904063	0.797739	0.926775	0.992945	1.00565	0.929825	0.0733684		8.68421	0.94492	0.957704	0.951861	0.956558	0.814949	0.928005	0.929186	0.788764	0.908993	0.0674347		8.68421	0.707457	0.796301	0.951857	0.796689	0.89419	0.823857	0.712721	0.987698	0.850012	0.710332	0.770348	0.89565	0.927064	0.869581	0.835268	0.0911808
	9.47368	0.973465	0.961525	0.823487	0.99118	0.942742	0.982259	0.978242	0.858119	0.904072	0.832313	0.965949	0.993315	1.00925	0.939686	0.0638586		9.47368	0.972577	0.973634	0.969278	0.976498	0.877822	0.932471	0.964753	0.868976	0.942001	0.0446088		9.47368	0.797795	0.889421	0.966994	0.840705	0.89419	0.837524	0.848397	1.00683	0.850013	0.783409	0.887825	0.954587	0.944191	0.891914	0.885271	0.064911
	10.2632	0.973565	0.961525	0.84915	0.994681	0.942742	0.98333	0.978242	0.85812	0.904074	0.853213	0.979919	0.99341	1.01009	0.944774	0.0582881		10.2632	0.978334	0.977713	0.972463	0.983103	0.909854	0.934458	0.98015	0.917555	0.956704	0.0307679		10.2632	0.860341	0.946499	0.971934	0.872435	0.89419	0.84338	0.938537	1.01143	0.850013	0.822739	0.949738	0.988938	0.950194	0.904065	0.914602	0.0589737
	11.0526	0.973587	0.961525	0.865772	0.996161	0.942742	0.983678	0.978242	0.85812	0.904075	0.865498	0.984722	0.993434	1.01028	0.947526	0.0549524		11.0526	0.9795	0.978742	0.973035	0.985252	0.925261	0.935339	0.986613	0.945061	0.9636	0.0244415		11.0526	0.900536	0.978895	0.973524	0.894664	0.89419	0.845856	0.991695	1.01252	0.850013	0.842391	0.978919	1.00809	0.952265	0.910557	0.931008	0.0612704
	11.8421	0.973592	0.961525	0.87634	0.996785	0.942742	0.983791	0.978242	0.85812	0.904075	0.872599	0.986353	0.993441	1.01033	0.949072	0.0529741		11.8421	0.979735	0.979	0.973137	0.985946	0.932467	0.935729	0.98929	0.960045	0.966919	0.0220985		11.8421	0.925144	0.996484	0.974033	0.909926	0.89419	0.846897	1.02087	1.01277	0.850013	0.851846	0.991948	1.0185	0.952975	0.913991	0.93997	0.0642409
	12.6316	0.973594	0.961525	0.88298	0.997047	0.942742	0.983828	0.978242	0.85812	0.904075	0.876664	0.986904	0.993442	1.01034	0.949962	0.0518075		12.6316	0.979782	0.979065	0.973156	0.98617	0.935792	0.935901	0.990393	0.968035	0.968537	0.0213301		12.6316	0.939764	1.0058	0.974196	0.920261	0.89419	0.847333	1.03625	1.01283	0.850013	0.856312	0.997624	1.02408	0.953218	0.915799	0.944834	0.0662554
	13.4211	0.973594	0.961525	0.887121	0.997158	0.942742	0.98384	0.978242	0.85812	0.904075	0.878979	0.98709	0.993443	1.01034	0.950482	0.0511196		13.4211	0.979791	0.979081	0.973159	0.986242	0.937318	0.935977	0.990846	0.972248	0.969333	0.0210912		13.4211	0.948296	1.01068	0.974248	0.927193	0.89419	0.847516	1.04418	1.01285	0.850013	0.858403	1.00007	1.02705	0.953301	0.916748	0.947481	0.0674191
	14.2105	0.973594	0.961525	0.889691	0.997204	0.942742	0.983844	0.978242	0.85812	0.904075	0.880293	0.987153	0.993443	1.01034	0.95079	0.0507127		14.2105	0.979793	0.979085	0.97316	0.986266	0.938015	0.936011	0.991032	0.974456	0.969727	0.0210201		14.2105	0.953222	1.01321	0.974265	0.931814	0.89419	0.847593	1.04823	1.01285	0.850013	0.859378	1.00112	1.02863	0.95333	0.917245	0.948935	0.0680498
	15	0.973594	0.961525	0.891282	0.997224	0.942742	0.983845	0.978242	0.85812	0.904075	0.881037	0.987174	0.993443	1.01034	0.950973	0.0504711		15	0.979794	0.979086	0.97316	0.986273	0.938334	0.936026	0.991109	0.975609	0.969924	0.0210009		15	0.95605	1.01452	0.97427	0.934881	0.89419	0.847625	1.05029	1.01285	0.850013	0.859832	1.00157	1.02946	0.95334	0.917506	0.949742	0.0683809
	Distance from cell centre at which we have 50% of total LUV Intensity
	cell nº	5 min	30 min	60 min
	1	6.997	7.728	4.716
	2	7.716	6.971	4.483
	3	6.481	7.396	5.465
	4	6.446	6.343	4.826
	5	5.331	4.096	2.018
	6	7.287	5.123	4.967
	7	6.381	7.403	1.45
	8	8.327	6.95	3.003
	9	6.799		2.586
	10	7.858		5.574
	11	8.097		6.701
	12	7.104		4.268
	13	6.925		5.782
	14	7.235
	15	7.438
	average	7.0948	6.50125	4.29531
	SD	0.765769	1.26776	1.5764
	Table Analyzed (Kruskal-Wallis test)
	Kruskal-Wallis test
	P value	0.0002
	Exact or approximate P value?	Approximate
	P value summary	***
	Do the medians vary signif. (P < 0.05)?	Yes
	Number of groups	3
	Kruskal-Wallis statistic	17.12
	Data summary
	Number of treatments (columns)	3
	Number of values (total)	28
	Table Analyzed (Dunn's multiple comparison test)
	Number of families	1
	Number of comparisons per family	3
	Alpha	0.05
	Dunn's multiple comparisons test	Mean rank diff,	Significant?	Summary	Adjusted P Value
	mDC 60 min vs. mDC 30min	-6.078	No	ns	0.3233	A-B
	mDC 60 min vs. mDC 5min	-15.89	Yes	***	0.0001	A-C
	mDC 30min vs. mDC 5min	-9.811	Yes	*	0.0283	B-C
	Test details	Mean rank 1	Mean rank 2	Mean rank diff,	n1	n2	Z
	mDC 60 min vs. mDC 30min	7.222	13.3	-6.078	9	10	1.608
	mDC 60 min vs. mDC 5min	7.222	23.11	-15.89	9	9	4.098
	mDC 30min vs. mDC 5min	13.3	23.11	-9.811	10	9	2.596

## Sheet: Figure 5J
	Average distance of non-coloc dots from coloc dots					Distance of non-coloc dots from coloc dots (average per cell)
	All siglc-1/VLP colocalising spots	5 min	30 min	60 min		Cell nº	5 min	30 min	60 min
	1	5.54412	4.27338	4.24069		1	4.98441	3.59358	2.47936
	2	5.54168	4.11563	4.08206		2	4.36827	3.69039	2.57791
	3	5.50005	4.11111	3.99057		3	5.93027	3.2422	2.96631
	4	5.50372	4.00912	3.9145		4	7.36523	3.77529	3.40441
	5	5.42418	3.96818	3.70506		5	6.84029	3.14071	3.08779
	6	5.44716	3.85308	3.85206		6	3.91405	3.41586	3.11983
	7	5.36443	3.82623	3.90782		7	6.81236	3.95384	2.54865
	8	5.49469	3.79103	3.42823		8	4.16332	4.82287	3.43304
	9	5.43918	3.72825	3.57342		9	5.49918	4.12477	3.51823
	10	5.41095	3.79242	3.46684		10		4.05088	3.98924
	11	5.35656	3.70134	4.02777		average	5.54193	3.78104	3.11248
	12	5.29672	3.72423	3.69129		SD	1.27552	0.492539	0.48852
	13	5.27695	4.20731	3.42437
	14	5.74151	3.64866	3.21366		Table Analyzed (Kruskal-Wallis test)
	15	5.2796	3.73688	3.49325
	16	5.2674	4.26896	3.30706		Kruskal-Wallis test
	17	5.23076	4.12229	3.20191		P value	<0,0001
	18	5.22277	3.98867	2.99413		Exact or approximate P value?	Approximate
	19	5.16468	3.62069	3.10348		P value summary	****
	20	5.19927	4.03428	3.03311		Do the medians vary signif. (P < 0.05)?	Yes
	21	5.60195	3.73509	3.51592		Number of groups	3
	22	5.22682	3.88864	3.35345		Kruskal-Wallis statistic	19.19
	23	5.35276	4.14392	2.82539
	24	5.17905	4.01359	3.52554		Data summary
	25	5.75002	4.37747	3.19371		Number of treatments (columns)	3
	26	5.27167	4.60676	2.73624		Number of values (total)	29
	27	5.1072	4.77789	2.86806
	28	5.80116	4.35047	2.6514
	29	5.6729	4.49714	3.00372		Table Analyzed (Dunn's multiple comparison test)
	30	5.25012	3.88322	2.80066		Number of families	1
	31	5.18904	3.7752	2.97205		Number of comparisons per family	3
	32	5.73905	4.33033	2.59434		Alpha	0.05
	33	5.28612	4.45807	3.93849
	34	5.20498	4.39933	3.80586		Dunn's multiple comparisons test	Mean rank diff,	Significant?	Summary	Adjusted P Value
	35	5.34195	4.47148	3.76335		mDC 5min vs. mDC 30 min	9.622	Yes	*	0.0417	D-E
	36	5.2602	4.41135	3.69304		mDC 5min vs. mDC 60 min	17.12	Yes	****	<0,0001	D-F
	37	5.10023	4.47823	3.45944		mDC 30 min vs. mDC 60 min	7.5	No	ns	0.1467	E-F
	38	5.25156	4.42224	3.64833
	39	5.51477	4.49325	3.73727		Test details	Mean rank 1	Mean rank 2	Mean rank diff,	n1	n2	Z
	40	5.42924	4.55856	3.13723		mDC 5min vs. mDC 30 min	24.22	14.6	9.622	9	10	2.46
	41	5.09209	4.48204	3.35666		mDC 5min vs. mDC 60 min	24.22	7.1	17.12	9	10	4.377
	42	5.47056	4.52216	3.22871		mDC 30 min vs. mDC 60 min	14.6	7.1	7.5	10	10	1.97
	43	5.63208	4.19954	3.93121
	44	5.04735	4.54229	3.51379
	45	5.58101	4.76755	3.22941
	46	5.12373	4.63164	2.96115
	47	5.43147	4.68945	3.3559
	48	5.44424	4.39628	3.20059
	49	4.8371	4.48325	3.06009
	50	4.97011	4.62072	2.79219
	51	5.44537	4.44912	2.93548
	52	5.34241	4.26567	3.01798
	53	5.15015	4.34365	3.49825
	54	5.46514	4.24729	3.36753
	55	5.65154	4.25086	2.70695
	56	4.92928	4.45189	3.54536
	57	5.02822	4.69121	3.278
	58	6.01616	4.55863	2.74185
	59	5.39014	4.31581	2.90081
	60	5.69573	4.34187	2.65919
	61	5.13096	4.3402	3.14281
	62	5.62039	4.34419	2.88332
	63	5.64993	4.37838	3.17434
	64	5.5239	4.53648	2.69286
	65	4.86231	4.42904	2.15042
	66	4.88859	4.51797	1.90231
	67	5.59376	4.51133	1.70935
	68	5.61812	4.55266	1.64105
	69	5.77635	4.63581	1.56987
	70	5.44862	4.46151	1.5698
	71	4.80864	4.51336	1.58741
	72	4.89276	4.58117	1.66867
	73	4.88522	4.47817	1.45585
	74	5.41031	4.63757	1.48474
	75	5.82359	4.63811	1.76765
	76	5.61824	4.62703	1.45361
	77	5.66684	4.68129	1.38628
	78	4.86675	4.79991	1.57974
	79	5.16885	4.77628	1.37358
	80	5.05297	4.80141	1.33814
	81	5.57653	4.95594	1.32063
	82	5.89806	4.98523	1.5908
	83	5.11982	4.98465	1.36932
	84	5.79801	4.99169	1.40433
	85	5.68413	5.00831	1.61694
	86	5.07133	5.09964	1.59223
	87	4.97686	5.14935	1.50403
	88	5.35556	5.1957	1.74559
	89	4.86514	5.09127	1.67209
	90	5.76668	5.37628	1.53985
	91	5.01895	5.41915	1.49904
	92	5.03305	5.33976	1.6653
	93	4.95165	5.54282	1.74301
	94	4.87829	5.70489	1.62121
	95	4.93641	5.67581	1.91584
	96	5.80817	5.86444	1.85723
	97	4.89331	5.85601	3.67369
	98	4.93273	6.12134	3.6523
	99	5.02063	6.18552	3.51288
	100	5.01641	6.24249	2.94246
	101	4.9945	6.24646	2.8368
	102	5.78965	6.32574	3.01415
	103	5.47457	6.03368	2.76972
	104	5.25793	6.34839	3.07537
	105	5.87857	6.28836	3.11274
	106	5.09139	6.31055	3.03705
	107	5.27843	6.31329	2.63142
	108	5.00669	6.37271	2.90521
	109	5.35399	6.45723	2.71183
	110	5.00792	6.42635	2.64456
	111	5.02595	6.49374	2.80082
	112	5.60445	6.43818	2.97072
	113	5.45811	6.50856	2.71221
	114	5.17645	6.52149	2.60443
	115	5.43028	6.66275	2.86464
	116	5.30134	6.61146	2.561
	117	4.97281	6.56095	2.56672
	118	5.18579	6.5754	3.21217
	119	5.10081	6.70831	2.52826
	120	4.83378	6.67665	2.84233
	121	4.8419	6.7453	3.21151
	122	4.76879	6.7888	3.11018
	123	5.68012	6.98397	3.4851
	124	5.31722	5.64706	3.53927
	125	4.62146	5.47114	2.50693
	126	5.4539	5.52688	2.67948
	127	5.36871	5.46999	3.00042
	128	5.16742	5.2789	2.77149
	129	4.43801	5.33526	3.14475
	130	5.48551	5.2642	2.6293
	131	4.51545	5.20627	2.89273
	132	4.48226	5.28378	3.36395
	133	5.42	5.14581	2.87018
	134	5.49714	4.974	2.68568
	135	4.19435	4.99427	2.57924
	136	4.11426	5.06522	2.5108
	137	3.97671	4.94356	2.57453
	138	4.06478	4.70571	2.59731
	139	4.09119	4.86489	2.60286
	140	4.77825	4.95271	3.69456
	141	4.62291	4.82694	3.7186
	142	5.90009	4.94896	3.55129
	143	5.99497	4.58322	2.90713
	144	6.13113	4.59151	2.82077
	145	6.56407	4.42884	3.05561
	146	6.63563	4.74989	2.76662
	147	5.23549	4.5067	3.15144
	148	5.38767	4.56922	3.21251
	149	5.26961	4.41954	3.12876
	150	5.31766	4.52829	2.61596
	151	5.37123	4.39806	2.97195
	152	5.21596	4.81646	2.71874
	153	6.76594	4.29601	2.65498
	154	7.40255	4.59164	2.87545
	155	6.56227	4.57366	3.16417
	156	6.26273	4.81368	2.82924
	157	6.58221	4.61055	2.65802
	158	6.6742	4.53273	3.06913
	159	6.41699	4.24363	2.60361
	160	6.61553	4.75724	2.64982
	161	9.60611	4.11841	3.52428
	162	9.56673	4.21893	2.79151
	163	9.23993	4.50612	3.10114
	164	9.25816	4.44533	3.58
	165	9.07869	4.30015	3.46625
	166	9.05425	4.04058	3.90127
	167	9.01008	4.03844	3.97579
	168	8.99804	3.90922	2.62576
	169	8.94642	3.75766	2.93214
	170	10.4843	3.72097	3.41397
	171	8.36771	3.84523	3.14368
	172	8.26775	3.69553	3.59486
	173	7.99234	3.76912	2.94677
	174	8.01125	3.72345	3.32456
	175	7.73351	3.55511	3.8797
	176	7.6646	3.61084	3.37632
	177	7.45543	3.50456	3.17429
	178	7.33987	3.62992	2.97132
	179	7.33814	3.85745	2.77145
	180	7.36113	3.51794	2.79261
	181	7.38376	3.60757	2.97426
	182	7.33742	3.62447	2.79703
	183	6.69405	3.53624	1.89112
	184	7.14637	3.48256	2.00779
	185	7.24901	3.47515	1.7915
	186	7.00411	3.58998	1.38093
	187	6.68499	3.48928	1.43698
	188	6.87045	3.73433	1.50575
	189	8.49633	3.67848	1.49892
	190	8.63065	3.37059	1.59488
	191	9.05839	3.43725	1.6691
	192	8.89175	3.49699	1.6217
	193	9.078	3.19348	1.71634
	194	9.13508	3.23467	1.55966
	195	8.42134	3.32542	1.56947
	196	6.59904	3.40398	1.6794
	197	6.20387	3.51711	1.60385
	198	8.05842	3.42635	1.891
	199	7.56993	4.0436	1.74595
	200	7.46798	3.23021	1.78546
	201	7.79181	3.50037	1.92816
	202	6.20917	3.52585	1.91062
	203	7.46159	3.26238	1.90593
	204	7.59183	3.30961	2.28119
	205	7.36471	3.43524	2.35268
	206	7.42312	3.37368	2.08729
	207	6.54897	3.36764	2.43319
	208	7.21403	3.39702	2.36076
	209	6.59031	3.4652	2.71187
	210	7.21073	3.3273	2.81398
	211	6.84122	3.36265	2.21113
	212	7.03705	3.42567	2.14748
	213	7.11723	3.63483	2.48515
	214	6.59656	5.74171	2.39465
	215	6.49747	4.97499	2.64204
	216	6.96257	5.6356	2.32506
	217	6.61478	5.53393	2.52024
	218	7.14826	5.14192	2.99546
	219	7.39999	4.74552	2.77765
	220	6.69179	4.65916	2.80269
	221	6.59823	4.85608	2.77156
	222	6.65966	5.10304	2.79159
	223	6.86993	4.7719	3.00025
	224	6.62701	4.90952	2.92687
	225	6.68444	5.18379	3.07087
	226	6.67589	4.96648	3.41936
	227	6.96275	5.47342	3.30817
	228	6.75507	4.25878	3.32619
	229	6.74563	5.29361	3.3465
	230	6.82036	4.37867	3.44891
	231	6.9259	4.72274	3.3677
	232	7.15141	4.54124	3.29386
	233	7.07223	4.61058	3.54971
	234	8.25128	4.84711	3.7058
	235	9.55043	4.88293	3.78915
	236	9.58645	4.06318	3.27304
	237	9.30111	5.08147	3.44541
	238	9.47887	5.32227	3.26265
	239	8.98299	4.56584	3.63084
	240	9.01962	3.91302	3.70105
	241	9.12608	4.59305	3.25289
	242	9.42402	5.12486	3.481
	243	9.10969	5.31665	3.41728
	244	7.41949	4.45754	3.16244
	245	9.12459	4.57398	3.49817
	246	9.03756	4.76774	3.54793
	247	9.04763	4.89887	3.42997
	248	9.47313	4.60496	3.47754
	249	8.94703	3.84906	3.56283
	250	8.97757	4.98143	3.40869
	251	8.62762	3.71474	3.35488
	252	8.47719	3.70784	3.49209
	253	8.92599	5.32659	3.26763
	254	9.02214	4.75415	3.55066
	255	9.15317	5.05861	3.37752
	256	9.15815	4.42185	3.25131
	257	7.84646	3.59667	3.02947
	258	9.09915	5.44721	3.01625
	259	9.30795	4.71781	2.86867
	260	8.97153	5.23257	2.91717
	261	8.72423	5.50563	2.8933
	262	9.08346	4.55719	2.94212
	263	4.1861	3.47242	2.86452
	264	4.35686	3.44864	2.867
	265	4.85313	3.34963	3.02756
	266	4.70645	5.19726	2.94616
	267	4.92354	3.3362	3.69162
	268	5.01354	4.89324	3.55739
	269	4.3182	4.66671	3.5802
	270	8.56295	4.81163	3.60292
	271	7.20313	3.18288	3.7282
	272	4.20569	3.2173	3.62752
	273	3.85659	4.81963	3.30937
	274	3.88	3.13136	3.47926
	275	4.09095	4.56471	3.57104
	276	6.84659	3.09681	3.6256
	277	3.96012	3.03234	3.51155
	278	4.04593	4.99314	3.72451
	279	4.00551	2.93717	3.20362
	280	4.01119	4.70736	3.48083
	281	8.26575	4.86806	3.51731
	282	4.03199	5.10165	3.47963
	283	8.17144	2.88429	3.33766
	284	4.62809	2.92321	3.26759
	285	4.96746	2.91524	2.98564
	286	4.79488	5.15989	3.32236
	287	4.67936	5.02059	3.36015
	288	8.1193	4.48647	3.25602
	289	7.70584	4.85834	3.27952
	290	5.02668	4.63325	3.33596
	291	8.0479	2.84763	3.19519
	292	4.89869	4.91945	3.12018
	293	4.89192	4.82394	3.23859
	294	8.19327	5.16556	3.02166
	295	7.57072	5.31847	3.26783
	296	7.80766	2.81724	3.11152
	297	5.99511	4.65733	2.97837
	298	7.53097	4.37084	2.79515
	299	7.30152	4.49459	2.76625
	300	7.06188	2.79637	2.74906
	301	6.07327	4.27919	2.67571
	302	7.14639	4.88232	2.64946
	303	7.02718	2.80109	2.78627
	304	7.39306	2.7968	2.64152
	305	7.03328	2.80082	2.61985
	306	6.16693	2.79805	2.75729
	307	6.47047	4.99728	2.67372
	308	5.8176	2.80566	3.07354
	309	6.56583	3.97277	2.81614
	310	6.42498	2.8198	2.9212
	311	4.7496	2.8282	3.01128
	312	6.39377	2.86937	3.24735
	313	6.17487	4.19318	3.09742
	314	5.52551	4.66834	2.08922
	315	6.59766	4.1582	2.07678
	316	6.0625	4.26758	2.15382
	317	5.71282	2.91578	2.23364
	318	5.39806	4.71312	2.89921
	319	4.50735	3.00917	3.26786
	320	4.37798	4.17186	1.90734
	321	6.49663	3.08914	2.06201
	322	5.85783	4.30236	2.12585
	323	6.00722	4.26795	2.89677
	324	5.12724	3.4501	1.93299
	325	5.54396	3.83201	1.88134
	326	5.46416	4.06508	1.69857
	327	5.66709	3.92893	1.93086
	328	4.34904	3.81635	1.97189
	329	5.29647	4.01242	1.87766
	330	4.6913	4.25825	1.91087
	331	4.4797	3.7657	1.99249
	332	4.20789	4.11968	1.85456
	333	3.97648	4.47788	1.8157
	334	5.57481	3.81447	1.94707
	335	4.10399	4.47483	1.75393
	336	3.8624	4.17005	2.07522
	337	4.41112	4.41898	1.86287
	338	4.23273	5.16929	1.7728
	339	3.80478	4.4575	1.61108
	340	3.62109	4.52459	1.6131
	341	4.02625	4.19121	1.79808
	342	6.61423	4.2135	1.61041
	343	3.75119	4.11485	1.62357
	344	3.97666	4.52494	1.93668
	345	3.584	4.05333	1.69166
	346	3.26345	4.87344	1.70318
	347	6.61714	4.69124	2.03523
	348	5.72039	4.33787	1.93808
	349	3.32763	3.97166	5.42206
	350	3.1587	4.00272	5.47506
	351	3.16795	4.05169	5.38028
	352	6.12278	3.85224	5.34108
	353	3.06848	4.32977	5.30656
	354	2.98879	4.24949	5.23802
	355	6.2672	3.97703	5.2195
	356	2.93638	3.86309	5.23507
	357	2.42184	3.82308	5.31707
	358	2.72054	3.71014	5.41973
	359	2.61015	5.03084	5.1997
	360	2.41279	3.6853	5.20698
	361	2.36513	3.63352	5.15953
	362	2.17834	3.71284	5.26234
	363	2.25589	3.59995	5.26063
	364	2.03448	3.76179	5.16667
	365	2.09085	4.55804	5.38739
	366	1.99478	3.62214	5.19808
	367	1.88525	5.1242	5.19181
	368	1.99442	3.45999	5.12414
	369	1.95199	3.47803	5.10334
	370	2.04897	3.43151	5.28829
	371	1.78931	4.40669	5.19681
	372	1.98399	3.45723	5.09994
	373	1.83703	4.97505	5.12945
	374	2.07239	3.33557	5.06592
	375	1.95864	3.36146	5.36565
	376	2.07374	4.87366	5.24438
	377	2.113	3.33821	5.19814
	378	1.97378	4.93558	5.06837
	379	1.91514	3.33688	5.03944
	380	5.17899	3.37024	5.12315
	381	4.74801	4.75265	5.05467
	382	4.54784	3.38929	5.02148
	383	2.37367	3.41865	5.21488
	384	4.93196	4.84439	5.06513
	385	5.51947	5.07363	5.20812
	386	2.5043	4.70251	5.14626
	387	2.45972	4.59195	4.97614
	388	5.20068	3.47697	5.02991
	389	5.27737	4.48928	5.00802
	390	2.56565	4.8126	5.208
	391	4.52277	3.78964	5.0725
	392	5.45346	4.44339	4.98575
	393	2.67132	3.70878	4.99836
	394	2.89008	3.85841	4.94692
	395	2.91726	3.6606	5.23215
	396	3.05258	4.57403	4.95118
	397	2.9302	3.62064	5.02587
	398	4.08172	4.42888	5.02244
	399	3.59002	3.60563	5.12552
	400	3.78059	3.72729	4.96777
	401	3.55366	4.54008	4.97722
	402	8.55027	3.90398	5.02017
	403	8.54803	3.81651	4.91538
	404	7.99056	3.72051	4.90658
	405	8.74197	3.81735	4.89417
	406	8.56582	4.58651	5.0812
	407	9.65028	3.76484	4.88197
	408	9.53408	4.01463	4.89447
	409	6.48618	4.24171	4.8995
	410	6.40257	4.39993	4.89427
	411	5.6562	4.14708	5.0984
	412	5.923	3.99837	4.87189
	413	5.84602	4.59261	4.93573
	414	9.54793	4.36727	4.90797
	415	5.77509	4.23016	4.82963
	416	5.44487	4.23293	4.85031
	417	5.91078	4.26803	4.83443
	418	9.81335	4.22756	4.84393
	419	9.8703	4.09894	5.09522
	420	9.906	4.09499	4.93303
	421	9.12312	4.11041	4.82877
	422	9.95113	4.16044	5.04973
	423	9.93926	4.11151	4.81183
	424	5.79271	4.33939	4.87686
	425	9.5356	4.14614	5.01979
	426	8.83263	4.13361	4.83697
	427	8.74819	4.1212	4.78782
	428	5.76245	4.15832	4.77646
	429	8.57421	4.13853	4.7746
	430	8.43038	4.19496	4.97821
	431	8.6336	4.39153	4.94808
	432	8.48739	4.20484	4.78097
	433	8.37978	4.25029	4.77555
	434	6.09729	4.43758	4.86854
	435	8.00624	4.407	4.9078
	436	8.1669	4.22475	4.76002
	437	6.42871	4.62313	4.74631
	438	7.97183	4.28338	4.734
	439	6.95004	4.44989	4.7466
	440	6.79862	4.4943	4.79294
	441	8.65028	4.42149	4.76083
	442	7.85036	4.51997	4.75366
	443	6.96725	4.58672	4.82581
	444	6.72764	4.37556	4.88229
	445	6.68058	4.72693	4.72805
	446	6.86466	4.83455	4.7516
	447	7.41358	4.61564	4.84941
	448	7.00919	4.86301	4.80683
	449	7.06968	4.95528	4.7009
	450	7.46934	4.84238	4.71544
	451	6.14219	5.10884	4.69609
	452	5.71773	5.21219	4.68697
	453	5.85535	5.34358	4.6795
	454	6.02717	5.33298	4.72295
	455	5.41754	5.31972	4.67274
	456	5.42102	5.46434	4.70664
	457	5.82399	5.45815	4.65971
	458	5.99728	5.45165	4.66235
	459	5.12982	5.57156	4.70555
	460	6.22183	5.42454	4.67122
	461	6.77957	5.4122	4.64837
	462	5.96932	5.53063	4.6561
	463	5.08111	5.5785	4.67916
	464	5.04679	5.43754	4.66415
	465	5.0111	5.53574	4.64194
	466	6.26148	5.49239	4.65623
	467	5.06611	5.66322	4.66671
	468	4.93315	5.63377	4.74554
	469	6.39173	5.61061	4.69834
	470	6.30771	5.64301	4.72185
	471	4.63658	5.80066	4.73296
	472	4.79432	5.87503	4.75903
	473	4.50959	5.74185	4.7591
	474	4.55588	5.7515	4.78177
	475	6.42238	5.81419	4.77112
	476	4.55035	5.88886	4.77135
	477	6.34773	5.75064	4.82055
	478	4.55653	5.80435	4.80019
	479	4.6307	5.82966	4.73727
	480	6.64029	5.91302	4.7894
	481	6.541	5.88567	4.84883
	482	4.60338	5.85759	4.78505
	483	4.69615	5.94807	4.74286
	484	4.5438	5.92094	4.76311
	485	6.25526	5.97382	4.78809
	486	4.52506	6.00949	4.96959
	487	4.61251	6.02265	4.76896
	488	6.26377	6.12676	5.00389
	489	6.27071	5.98852	4.79564
	490	4.66158	6.0046	4.80091
	491	6.46554	5.9316	4.78184
	492	6.4112	6.08993	4.84552
	493	4.75263	6.02395	4.80449
	494	4.79217	6.12667	4.81602
	495	6.38269	6.07019	4.82814
	496	6.36583	6.22445	4.84943
	497	6.44285	6.18808	4.87436
	498	4.90735	6.14283	4.79419
	499	4.97087	6.17873	4.87728
	500	5.0548	6.18866	4.87364
	501	5.15967	6.2706	4.8412
	502	5.07324	6.25567	4.8497
	503	5.10229	6.34995	4.9324
	504	5.12551	6.29974	5.0789
	505	5.12505	6.38142	4.96519
	506	6.36324	6.40367	4.91148
	507	6.42489	6.39787	4.87844
	508	6.42775	3.94073	4.84862
	509	5.98204	3.94821	4.87383
	510	6.47574	3.99354	4.89823
	511	6.02761	4.0545	4.84699
	512	5.43861	3.98684	4.85689
	513	6.03192	3.76093	4.89409
	514	6.44119	3.90335	4.93626
	515	6.30538	4.1372	4.90983
	516	6.50043	3.75486	4.95954
	517	6.23944	4.29981	4.88971
	518	6.11819	4.23451	4.89511
	519	5.59882	3.759	4.98323
	520	6.34019	4.12082	4.91135
	521	6.30519	3.65405	4.97597
	522	5.64787	4.04572	4.92237
	523	6.33219	4.04703	4.97024
	524	6.72519	4.17215	4.98906
	525	6.04351	3.59627	4.97192
	526	6.3349	4.22773	4.93964
	527	6.87932	3.56392	4.94358
	528	5.38318	3.55131	4.96943
	529	5.46884	4.20128	4.96131
	530	5.381	4.26204	4.96924
	531	5.32812	4.07774	4.96755
	532	5.29953	3.5548	5.04821
	533	5.25312	3.57559	5.00507
	534	5.21878	3.60941	5.0062
	535	5.44494	4.27532	5.04428
	536	5.25602	3.53953	5.01394
	537	5.36153	3.57618	5.01944
	538	5.14925	4.31489	5.06114
	539	5.10034	4.2631	5.02581
	540	5.10446	3.62706	5.06096
	541	5.46845	4.42073	5.07987
	542	5.11425	3.58536	5.06168
	543	5.18148	4.60991	5.06904
	544	5.11316	4.49892	5.08309
	545	5.05587	4.52922	5.08871
	546	5.00534	4.33675	5.0848
	547	5.05552	3.60428	5.1493
	548	5.32864	4.35055	5.1644
	549	5.03157	3.67961	5.17045
	550	5.31658	4.32734	5.2995
	551	5.04457	4.33148	3.54822
	552	5.46168	3.72825	3.47558
	553	5.02194	3.70597	3.36066
	554	5.01798	4.5806	3.44706
	555	5.49496	3.56875	3.55688
	556	5.34893	3.70214	3.49978
	557	4.97863	4.64895	3.82551
	558	5.15218	3.67441	3.57041
	559	5.41281	3.61922	3.3195
	560	4.99623	3.69854	3.35433
	561	5.19008	3.63302	3.57961
	562	5.02091	4.60914	3.21187
	563	5.26297	3.72075	3.58504
	564	5.06434	3.67671	3.21536
	565	5.24779	4.64339	3.23711
	566	5.16886	3.76636	3.68428
	567	5.06447	3.79143	3.31268
	568	5.08882	4.83283	3.29904
	569	5.08615	4.72919	3.34231
	570	5.25074	3.77154	3.72476
	571	5.0586	3.79288	3.61282
	572	5.1806	4.25178	3.1893
	573	5.16123	3.8839	3.15134
	574	5.02527	3.90165	3.57766
	575	5.03386	3.99672	3.15872
	576	4.80957	4.01153	3.38593
	577	5.0069	4.75863	3.3022
	578	4.99058	4.0499	3.14503
	579	4.87742	4.72383	3.12371
	580	5.30058	4.40158	3.69353
	581	4.98229	4.26562	3.81827
	582	5.16746	4.13413	3.04356
	583	5.01452	4.08403	3.31573
	584	5.15426	4.76964	3.56303
	585	5.54872	4.61722	3.09784
	586	4.89808	4.078	3.05706
	587	5.20648	4.69501	3.08528
	588	5.2898	4.16408	3.04337
	589	5.12666	4.37064	3.44598
	590	5.14197	4.1466	3.13207
	591	5.0156	4.6392	3.23724
	592	4.95178	4.509	3.08513
	593	4.99605	4.81118	2.99767
	594	5.06924	4.30438	3.14563
	595	5.08374	4.56946	3.27742
	596	5.24491	4.62323	3.51574
	597	4.90062	4.40998	3.1316
	598	4.90603	4.56267	3.74229
	599	4.99758	4.53688	2.96285
	600	4.96247	4.08432	2.8951
	601	4.84645	4.34438	2.97565
	602	5.27019	4.18751	2.95473
	603	5.04591	3.8298	3.06847
	604	5.08691	3.99685	2.84346
	605	4.74477	4.13742	3.57809
	606	5.13793	4.04236	3.24305
	607	4.92009	3.8994	3.36062
	608	4.99116	3.86292	2.91747
	609	5.30361	3.83591	3.55629
	610	4.88311	3.94244	3.16631
	611	5.21796	3.94161	3.04642
	612	5.11724	3.84826	3.08449
	613	4.79671	4.03775	2.95449
	614	4.67987	4.16715	3.28156
	615	5.13075	4.0756	2.86112
	616	4.55586	3.7874	2.87915
	617	5.20866	4.28154	3.48323
	618	4.71183	4.12986	3.1204
	619	4.71758	4.18526	3.29734
	620	4.63614	4.16086	3.53383
	621	4.55842	3.74755	2.97567
	622	4.62026	4.07537	2.77225
	623	5.26145	4.34556	3.04702
	624	4.57517	4.05567	2.88881
	625	4.6149	4.28179	3.18095
	626	4.7013	4.00944	2.71743
	627	4.69561	4.1041	2.86299
	628	4.67447	4.11792	2.7755
	629	5.27538	4.26079	3.03441
	630	5.01999	3.76181	3.31199
	631	4.8543	4.04483	3.39878
	632	5.35637	3.82719	2.79571
	633	4.76769	4.19591	2.73715
	634	4.8845	3.99503	2.96873
	635	4.68611	4.0687	3.49096
	636	4.94557	3.76292	2.68276
	637	4.68845	3.86007	2.68595
	638	4.70635	4.14696	3.0531
	639	5.13964	4.01414	3.21836
	640	5.04389	3.97181	3.31433
	641	4.85562	3.81294	3.40031
	642	5.11344	3.91339	2.71636
	643	4.98778	4.06403	2.91631
	644	4.79149	4.16903	2.84047
	645	4.87565	4.05736	2.58729
	646	4.83889	4.19243	2.64764
	647	4.75221	3.83569	2.8953
	648	4.7313	4.17832	2.77288
	649	4.70625	3.78787	2.61148
	650	5.02642	3.91694	2.57957
	651	4.71901	3.84488	2.97531
	652	5.19296	4.09226	2.826
	653	4.80109	3.82568	2.88619
	654	4.73623	3.83449	3.01354
	655	4.58948	3.89568	3.06108
	656	4.97839	3.87515	2.6506
	657	4.8039	3.84794	3.49496
	658	5.14523	3.85004	3.91813
	659	5.13092	3.90122	3.45981
	660	4.71058	3.88156	3.52519
	661	4.77829	4.11087	4.01281
	662	4.72976	4.23282	3.7771
	663	4.64867	3.90963	3.545
	664	4.38889	3.98343	3.66489
	665	4.20842	4.07082	3.89083
	666	4.18332	3.93778	2.87934
	667	4.59123	4.13003	3.38254
	668	4.17431	4.03361	3.65551
	669	6.02525	4.21182	3.72196
	670	5.56778	4.28201	2.62546
	671	5.44396	4.39805	3.92836
	672	6.0288	4.16565	2.77875
	673	6.11116	4.42157	4.04722
	674	5.72546	4.05619	2.75709
	675	5.98682	3.97327	2.83913
	676	5.79441	3.96259	4.00539
	677	5.84428	3.90092	4.18481
	678	5.92316	3.87118	2.8205
	679	5.59727	3.79225	4.32947
	680	6.24933	3.86614	2.8747
	681	6.87677	3.93342	3.13474
	682	6.04978	3.72969	2.91109
	683	6.10642	3.78233	2.9246
	684	6.10577	3.65141	2.95652
	685	6.188	3.81811	3.61598
	686	6.25257	3.65586	3.02481
	687	6.28997	3.65498	3.03892
	688	9.10454	3.55152	3.22217
	689	9.05414	3.78307	3.18391
	690	8.69804	3.95655	3.32149
	691	8.68355	3.93952	3.11268
	692	8.55272	3.64824	3.30035
	693	8.51572	3.70305	3.33321
	694	8.44001	3.64521	4.26975
	695	8.37466	3.74747	3.17272
	696	8.36405	3.84563	3.96156
	697	10.0598	3.6222	3.88923
	698	7.7546	3.92801	3.0139
	699	7.66459	3.47767	3.04416
	700	7.43939	3.75014	3.52019
	701	7.50705	3.49301	4.31079
	702	7.23074	3.63025	3.11838
	703	7.18845	3.54741	3.61525
	704	7.00519	3.57007	3.13014
	705	6.91385	3.61847	4.34462
	706	6.99927	3.46327	3.48664
	707	7.03709	3.36228	3.23392
	708	7.08785	3.26239	3.15346
	709	7.07329	3.36921	3.19077
	710	6.48659	3.29026	3.80425
	711	7.00708	3.49588	4.06185
	712	7.12543	3.1734	3.2826
	713	6.92996	3.38984	3.56095
	714	6.8301	3.30787	3.72668
	715	7.05336	3.01958	3.36538
	716	8.19111	3.08896	3.19864
	717	8.33069	3.26225	4.1493
	718	8.76995	3.15558	3.27492
	719	8.60952	3.26076	3.6005
	720	8.80322	2.86534	3.85518
	721	8.86927	3.00764	4.34751
	722	8.15442	3.24615	3.46479
	723	6.84936	2.83999	3.35643
	724	6.36246	2.79684	3.83729
	725	7.81713	3.12138	3.49493
	726	7.31037	3.09775	3.35668
	727	7.21883	2.70674	3.41466
	728	7.55006	3.02635	3.63606
	729	6.37257	2.91511	3.69848
	730	7.22379	2.95192	3.9287
	731	7.35587	3.15353	3.83683
	732	7.14073	2.99103	3.5624
	733	7.19503	3.02079	3.98408
	734	6.87	2.91059	3.82163
	735	7.00524	3.06365	3.8079
	736	6.94866	2.96077	4.08079
	737	7.0696	3.36405	3.437
	738	6.76546	7.5988	3.47356
	739	6.92888	4.94716	3.55904
	740	6.98867	5.25782	3.45697
	741	6.96312	4.48937	3.9396
	742	6.8272	7.97598	3.50692
	743	6.8923	4.50512	4.29784
	744	6.99263	4.7811	3.58131
	745	7.04739	4.43384	3.78058
	746	7.28561	4.48791	3.7118
	747	7.0949	4.68717	4.19134
	748	6.9302	4.5173	4.05646
	749	7.03387	4.54815	4.08649
	750	6.92848	4.69505	3.76959
	751	6.95061	4.78833	3.73172
	752	6.96602	4.64349	4.00529
	753	6.92016	4.58903	3.05023
	754	7.0295	3.91582	3.15693
	755	7.00666	4.56747	3.01315
	756	6.9777	4.85744	2.92197
	757	7.10867	5.01565	2.93091
	758	7.14466	4.07589	2.83606
	759	7.22477	4.27989	3.10701
	760	7.19563	4.53071	2.88345
	761	8.26336	4.88933	2.89359
	762	6.69833	4.39255	3.2218
	763	6.6732	4.58167	2.86702
	764	6.27088	4.02544	2.71543
	765	6.34565	4.06525	2.84745
	766	6.00847	4.56487	2.83533
	767	5.99693	4.53987	2.81448
	768	5.99241	4.87409	2.94305
	769	6.10407	4.62629	3.20219
	770	5.9288	4.17267	2.70191
	771	7.0602	4.63854	2.70746
	772	5.61972	4.20546	2.96243
	773	5.53667	4.26176	2.84213
	774	5.60945	4.22539	3.02346
	775	6.15963	4.31649	2.7223
	776	5.65713	4.55891	2.80713
	777	5.76017	4.37004	2.59021
	778	5.48473	4.36616	2.62429
	779	5.40512	4.53372	3.36436
	780	6.08031	5.17544	2.8946
	781	6.20525	5.38811	2.75199
	782	6.39366	5.22189	2.90436
	783	6.47145	5.22412	3.01974
	784	5.51382	5.10851	2.62501
	785	6.67826	5.07307	2.56591
	786	6.89252	4.92423	2.75093
	787	6.70139	4.89398	2.90006
	788	7.08628	4.84746	2.49444
	789	7.56244	4.76657	2.92691
	790	6.65153	4.83738	2.69709
	791	6.84709	4.72261	2.61564
	792	7.3688	4.73704	2.45084
	793	7.25737	4.99764	2.47816
	794	7.48839	4.6397	3.02888
	795	7.60307	4.72764	2.53435
	796	6.91162	4.98365	2.40925
	797	7.47665	4.85184	2.49665
	798	6.6178	4.74736	2.66403
	799	6.8392	4.52711	3.18826
	800	6.37969	4.70341	2.8979
	801	6.42444	4.62024	2.45067
	802	6.70969	4.45876	2.50198
	803	6.72434	4.61895	2.86293
	804	6.53851	4.51416	2.34788
	805	6.65522	4.74062	2.37167
	806	6.582	4.87698	2.63031
	807	6.59933	5.0043	2.70938
	808	7.71263	4.66378	2.40445
	809	6.53885	4.71008	2.48928
	810	7.92315	4.28618	2.84507
	811	6.99112	4.11813	2.66925
	812	6.8183	4.38112	2.34219
	813	6.93489	4.47454	2.28087
	814	6.93722	4.39255	2.29383
	815	7.96094	4.42939	3.00117
	816	7.74018	4.33764	2.40934
	817	7.01834	4.35964	2.3166
	818	8.02231	4.29247	2.26392
	819	7.12484	4.32784	2.56641
	820	7.33581	4.57137	2.27822
	821	8.18701	4.2773	2.39672
	822	7.92302	4.23137	2.6256
	823	8.09761	3.87248	3.11394
	824	7.51617	4.1548	2.38837
	825	7.95648	4.42782	2.21757
	826	7.95444	4.25071	2.93605
	827	7.84032	4.21282	2.29031
	828	7.6688	3.8394	2.28977
	829	7.97963	3.88694	2.97192
	830	7.91288	4.12269	2.17207
	831	8.1672	3.94304	2.17777
	832	8.12846	3.67031	2.37213
	833	7.91948	3.72423	2.45145
	834	8.00455	3.64948	2.87255
	835	8.4799	3.63862	2.68903
	836	4.63429	3.8954	2.13914
	837	4.55664	4.1196	2.54304
	838	4.8066	3.99362	2.31295
	839	4.27363	3.64691	2.52818
	840	4.19705	3.67384	2.16699
	841	4.12685	3.66651	2.27363
	842	4.21752	3.66276	2.34807
	843	4.00214	3.67109	2.43564
	844	3.92982	3.88429	2.11887
	845	3.89885	3.71514	2.10142
	846	4.09499	3.74346	2.07308
	847	4.21605	3.77987	2.36908
	848	4.12073	3.77929	2.61019
	849	3.89036	3.85072	2.06904
	850	3.93025	3.7185	2.0616
	851	3.90542	3.73424	2.43162
	852	3.86377	3.88297	2.28919
	853	3.88606	3.72048	2.08581
	854	3.86214	3.89342	2.03993
	855	4.13807	3.81081	2.04588
	856	3.83523	3.79155	2.09872
	857	3.91161	3.88743	2.12358
	858	3.99321	3.98146	2.04626
	859	4.16294	3.91881	2.48193
	860	4.14624	3.89209	2.94738
	861	3.75543	4.12735	2.43947
	862	4.05941	4.05729	2.50411
	863	4.22254	4.44454	3.04183
	864	3.82961	4.36696	2.76027
	865	3.86324	4.50926	2.51009
	866	4.1548	4.74402	2.62936
	867	4.24857	4.82455	2.87037
	868	3.96669	4.16433	2.10248
	869	4.07031	4.67164	2.36483
	870	4.06856	4.99381	2.61177
	871	3.90479	5.00502	2.67378
	872	4.0458	4.8531	2.37063
	873	4.32752	5.21877	2.88423
	874	4.05706	4.18323	2.22038
	875	3.64834	4.1333	3.00199
	876	4.05637	5.52188	2.36583
	877	4.27355	5.34649	2.3295
	878	4.08497	4.32092	2.94428
	879	3.78268	4.34781	3.14572
	880	4.03198	4.37742	2.38446
	881	4.08983	4.37082	3.29763
	882	3.84677	4.43766	2.47675
	883	4.01731	5.25716	2.3091
	884	4.39071	4.44127	2.40786
	885	4.08231	4.40893	2.72048
	886	4.1167	4.44937	2.37828
	887	4.26138	4.47802	2.58663
	888	4.17789	5.39239	2.32428
	889	4.27038	4.65068	2.37691
	890	4.1723	5.2497	3.379
	891	4.29696	4.71028	2.36813
	892	4.1647	5.21812	3.51829
	893	4.24362	5.22782	2.39585
	894	4.34039	5.20075	2.44761
	895	4.2229	5.58393	2.43884
	896	4.26513	5.01286	3.22082
	897	4.17021	5.11549	2.4196
	898	4.45779	5.17522	2.90102
	899	4.25954	5.43201	2.8356
	900	4.42342	5.11934	2.58064
	901	4.17833	5.3047	2.67309
	902	4.32252	5.27076	2.54595
	903	4.23317	5.52277	3.26096
	904	4.27769	4.95935	2.5932
	905	4.41726	4.79853	2.6342
	906	4.50163	4.84123	2.51378
	907	3.74701	4.78194	3.29178
	908	3.64329	4.65649	3.61632
	909	3.60683	4.65354	2.90398
	910	4.12553	4.59284	2.72092
	911	3.69287	4.60627	2.57404
	912	3.8978	4.59234	2.76917
	913	4.07131	4.55999	3.00163
	914	4.12942	4.3277	2.60434
	915	3.81353	4.4286	2.60768
	916	3.87908	4.37981	2.71555
	917	4.12884	4.39433	2.5974
	918	3.69025	4.17538	2.78658
	919	3.9612	4.34581	3.0898
	920	4.09507	4.42792	2.79823
	921	4.14985	4.31773	2.66423
	922	4.2537	4.43902	2.82613
	923	4.208	4.09759	3.29476
	924	4.35894	4.11437	2.64125
	925	3.91337	3.96284	2.78711
	926	4.10917	4.26384	2.82619
	927	4.25717	4.03847	2.73948
	928	4.42427	4.12366	2.83423
	929	6.85601	3.9855	2.75004
	930	6.74098	4.12092	2.72958
	931	6.42992	3.99919	2.76057
	932	6.74347	4.14185	2.91503
	933	6.56001	3.92846	2.84955
	934	7.28334	4.19332	2.74579
	935	7.19687	4.18997	2.95493
	936	5.99007	4.15376	2.92115
	937	6.02855	3.92729	2.87041
	938	5.37788	3.83969	3.04686
	939	6.52137	3.91364	2.97964
	940	6.37229	4.43807	2.83661
	941	6.91681	3.85433	2.83042
	942	6.36089	3.92257	3.03708
	943	5.35558	4.19269	2.95801
	944	6.8982	4.1623	2.96258
	945	7.02534	3.65014	3.26038
	946	7.04878	3.85126	2.91792
	947	7.0507	3.41627	2.93366
	948	6.44309	3.78321	2.94475
	949	7.0707	3.66588	3.17038
	950	7.04121	3.65799	3.07185
	951	4.69951	3.79509	3.14092
	952	6.78635	3.67969	3.10073
	953	6.32274	3.76035	3.14005
	954	6.40913	3.75732	3.33538
	955	6.77409	3.61788	4.91606
	956	6.35004	3.69003	5.54748
	957	6.28104	3.59017	4.86979
	958	6.44481	3.7297	5.32474
	959	6.35991	3.99174	4.74314
	960	6.30735	3.64468	5.43003
	961	6.18908	3.74895	5.06566
	962	6.30238	3.80235	4.97628
	963	6.42833	3.69692	4.61808
	964	6.61583	3.64161	5.26738
	965	6.4204	3.65796	4.56279
	966	6.33032	3.78868	4.68317
	967	6.38486	3.6973	5.25609
	968	6.74237	3.98656	5.50273
	969	6.40008	3.92601	4.50331
	970	6.42873	3.55664	4.65995
	971	6.53444	3.47115	4.53826
	972	6.63544	3.5272	4.35417
	973	6.63407	3.30823	4.22465
	974	6.57841	3.3777	4.34925
	975	6.64079	3.50371	4.56815
	976	6.67017	3.47811	5.53784
	977	6.72404	3.74691	4.15225
	978	4.52823	3.63459	5.87569
	979	4.32266	4.38311	5.00134
	980	4.22815	3.37279	5.31353
	981	3.97815	3.73275	4.77667
	982	4.01133	3.60837	4.31581
	983	3.83677	3.42343	4.11694
	984	3.8701	3.48781	4.0175
	985	3.96355	3.65087	3.9289
	986	3.75707	3.53057	4.23778
	987	3.85331	3.56716	5.71968
	988	3.78687	3.60363	3.76551
	989	3.5766	3.69534	4.23603
	990	3.55887	3.52569	3.72905
	991	3.98412	3.56773	4.29749
	992	3.569	3.64797	3.72811
	993	3.63155	3.91552	3.6319
	994	3.60312	4.7413	5.63586
	995	3.56263	4.52458	3.50057
	996	3.58761	4.64422	5.46397
	997	3.54236	4.59989	3.2611
	998	3.54727	4.49459	3.08613
	999	3.58215	4.42807	2.52818
	1000	3.62193	4.40654	1.96608
	1001	3.77158	4.40895	1.8908
	1002	3.51661	4.4192	1.62305
	1003	3.71326	4.39269	4.42877
	1004	4.28417	4.3874	1.43207
	1005	3.85789	4.42323	1.44093
	1006	3.79361	4.3725	4.04052
	1007	3.95203	4.49282	1.29042
	1008	3.56027	4.68273	1.34446
	1009	3.9531	4.41968	1.19905
	1010	3.9523	4.31449	3.76492
	1011	4.31722	4.26108	3.87644
	1012	4.01084	4.27205	4.11635
	1013	4.6303	4.26594	1.24231
	1014	4.45918	4.29281	3.72087
	1015	4.24422	4.2931	1.08547
	1016	4.60953	4.41362	1.06389
	1017	4.34423	4.27822	3.67049
	1018	4.59085	4.35241	1.10061
	1019	4.65999	4.20878	3.53495
	1020	4.98147	4.47942	3.82027
	1021	4.77522	4.15261	3.38294
	1022	4.86346	4.26588	3.18464
	1023	4.4703	4.29854	2.88008
	1024	4.58141	4.07276	3.43686
	1025	5.26246	4.08834	3.20664
	1026	4.60803	4.10341	1.59566
	1027	5.3425	4.11348	1.32249
	1028	4.72057	4.04181	2.98402
	1029	4.55724	4.27803	1.84535
	1030	4.72171	4.129	3.07913
	1031	4.64302	4.40582	3.56535
	1032	4.73543	4.29568	3.4734
	1033	4.51733	4.25356	3.34236
	1034	4.66797	4.01107	3.36805
	1035	5.51855	4.11981	3.44462
	1036	4.81143	3.95314	3.38124
	1037	4.88132	4.3552	3.18544
	1038	5.00985	4.30514	3.18505
	1039	4.92508	3.93924	3.21023
	1040	5.00881	4.16719	3.27076
	1041	4.98025	4.31838	3.254
	1042	5.02066	3.88273	3.13219
	1043	5.0932	4.17591	3.24842
	1044	5.05772	4.45463	3.39797
	1045	5.04542	4.45782	3.25034
	1046	5.17296	4.08462	3.07645
	1047	5.19032	4.29462	3.09739
	1048	5.85213	3.94872	3.16422
	1049	5.26419	3.83123	3.23651
	1050	5.35622	3.86227	3.09183
	1051	5.81812	4.08861	2.99064
	1052	5.63053	4.18334	3.41313
	1053	5.91025	3.82846	3.35487
	1054	5.44706	4.14692	3.66524
	1055	5.59225	3.7145	3.10191
	1056	5.76845	4.0585	3.26778
	1057	5.12463	3.80396	2.97984
	1058	5.12389	3.84211	3.00569
	1059	5.5564	3.80128	3.05753
	1060	5.73689	3.68146	3.08843
	1061	4.81726	3.75882	3.17402
	1062	5.95775	3.8912	2.91256
	1063	6.53067	3.8314	3.57149
	1064	5.70408	3.73057	3.23124
	1065	4.76225	3.67352	2.85572
	1066	4.7352	3.90341	3.05674
	1067	4.69571	3.82107	2.84881
	1068	5.99845	3.53991	3.54716
	1069	4.8274	3.72566	3.45539
	1070	4.61211	3.61453	3.53259
	1071	6.14049	3.7577	3.05915
	1072	6.05569	3.73469	3.42917
	1073	4.28428	3.69345	3.52743
	1074	4.48897	3.87803	3.39952
	1075	4.12179	3.9626	3.35146
	1076	4.16355	3.90209	3.23991
	1077	6.18123	3.59042	3.3349
	1078	4.15349	3.46318	3.31945
	1079	6.10512	3.49713	3.21563
	1080	4.15624	3.71183	3.38204
	1081	4.23433	3.40368	3.6208
	1082	6.39919	3.66988	3.03374
	1083	6.29738	3.79619	3.33683
	1084	4.20625	3.72524	3.18514
	1085	4.31261	3.73326	3.54344
	1086	4.14097	3.62589	2.96199
	1087	5.98862	3.72218	3.02515
	1088	4.11282	3.60895	3.13464
	1089	4.204	3.25682	3.10372
	1090	5.99431	3.69066	2.98546
	1091	5.99882	3.63623	3.72982
	1092	4.25005	3.48862	3.24577
	1093	6.19699	3.31309	3.00832
	1094	6.1397	3.52657	3.14131
	1095	4.34888	3.29953	2.97956
	1096	4.39271	3.34268	3.11953
	1097	6.11001	3.45785	2.97621
	1098	6.09187	3.55942	2.96868
	1099	6.17334	3.32553	2.93595
	1100	4.57001	3.32157	3.08991
	1101	4.64847	3.31873	3.08242
	1102	4.75054	3.38474	3.02932
	1103	4.86394	3.40197	3.11675
	1104	4.77563	3.24851	3.07735
	1105	4.80668	3.28598	3.06378
	1106	4.84021	3.3422	3.19737
	1107	4.84344	3.30823	2.89033
	1108	6.05076	3.33465	3.08971
	1109	6.12036	3.3708	2.71468
	1110	6.11867	3.45009	2.90221
	1111	5.64671	3.40744	2.76201
	1112	6.16669	3.44284	3.03597
	1113	5.69238	3.56856	2.76524
	1114	5.21272	3.54975	2.68831
	1115	5.71153	3.517	2.57896
	1116	6.12136	3.52393	2.94665
	1117	5.97933	3.41954	2.59065
	1118	6.18493	3.87133	2.56508
	1119	5.91535	3.38298	2.99349
	1120	5.80692	3.39674	3.21273
	1121	5.40155	3.33231	2.57478
	1122	6.01785	3.28734	2.54877
	1123	5.98687	3.35011	2.51405
	1124	5.45601	3.3304	2.49377
	1125	6.02969	3.36478	2.50044
	1126	6.4364	3.56001	2.46373
	1127	5.87651	3.41053	2.523
	1128	6.12633	3.25865	3.32126
	1129	6.68696	3.35631	2.57354
	1130	4.79231	3.27046	3.68034
	1131	5.04348	3.2197	2.82614
	1132	4.87338	3.42035	3.16117
	1133	4.72421	3.19735	2.71663
	1134	4.7839	3.15683	2.43593
	1135	4.63846	3.17144	2.39821
	1136	4.66197	3.17542	2.38594
	1137	5.06893	3.31068	2.41217
	1138	4.64611	3.49421	2.41871
	1139	4.98918	3.65919	3.70109
	1140	4.52655	3.25724	2.43705
	1141	4.48426	3.41056	2.4443
	1142	4.50905	3.0947	2.33394
	1143	4.85314	3.2891	2.47902
	1144	4.52799	3.05315	2.74081
	1145	4.74146	3.17957	2.64249
	1146	4.6193	3.04612	3.73702
	1147	4.47285	3.78272	2.32058
	1148	4.43823	3.07713	3.67562
	1149	4.51017	3.04243	2.70741
	1150	4.69987	3.16102	2.60016
	1151	4.42007	3.0548	2.59542
	1152	4.9793	3.00059	2.56051
	1153	4.52048	3.65558	2.63727
	1154	4.84629	3.25476	2.66682
	1155	4.37579	3.02653	3.79078
	1156	4.57634	3.57084	2.74613
	1157	4.8812	3.06408	2.9333
	1158	4.72051	3.66295	3.55333
	1159	4.32479	3.0413	2.75215
	1160	4.82384	3.07528	2.6695
	1161	4.7886	3.58124	2.9184
	1162	4.33937	3.28604	3.46776
	1163	4.90485	3.2003	3.58114
	1164	4.36754	3.76355	3.74009
	1165	5.00344	4.00057	2.72342
	1166	4.74368	3.64817	3.52684
	1167	4.97858	3.56496	3.11054
	1168	4.52597	3.29252	2.81846
	1169	4.41306	3.50936	3.58101
	1170	4.82563	3.77662	2.8419
	1171	4.43259	3.25696	3.52779
	1172	4.60895	3.51704	3.78546
	1173	4.81799	3.28344	3.50921
	1174	4.53679	3.2809	3.45694
	1175	4.9553	3.33947	3.32485
	1176	4.37015	3.6414	3.70632
	1177	4.37993	3.38373	3.63191
	1178	4.51767	3.55115	3.13793
	1179	4.79706	3.44053	3.1502
	1180	4.36438	3.36826	3.55475
	1181	4.25218	3.64848	3.28074
	1182	5.18025	3.38883	3.73692
	1183	4.38249	3.36765	2.73932
	1184	4.60729	3.45085	3.84515
	1185	4.83406	3.41135	2.68591
	1186	5.00995	3.76038	2.64128
	1187	5.06915	3.54033	2.69722
	1188	4.29764	3.58081	2.73027
	1189	4.66182	3.65197	2.70658
	1190	5.17548	3.7631	2.79414
	1191	4.56675	3.66588	2.74971
	1192	4.60093	3.66551	3.37421
	1193	4.44748	3.9179	2.69103
	1194	4.76415	3.78943	2.67152
	1195	4.82627	3.76425	2.77026
	1196	4.53096	3.53283	3.37574
	1197	4.56091	3.77635	2.81026
	1198	4.75307	3.6413	2.70537
	1199	4.36564	3.00012	3.57783
	1200	4.74177	2.98981	2.94463
	1201	4.87096	2.93572	2.83134
	1202	4.83577	3.16097	2.78812
	1203	4.3282	2.90701	2.99015
	1204	4.81275	3.29606	2.73389
	1205	4.57005	3.02576	2.83432
	1206	4.6329	2.95969	3.27543
	1207	4.51605	2.86595	3.01635
	1208	5.0433	2.94123	2.83742
	1209	4.73329	2.87734	3.23491
	1210	4.55852	3.05711	2.85121
	1211	4.91843	3.29626	2.90804
	1212	4.62878	3.01291	3.0222
	1213	4.82464	3.12437	2.99514
	1214	4.71039	3.4883	3.38303
	1215	4.47288	3.21393	3.28749
	1216	4.28807	2.98042	2.92404
	1217	4.95613	3.52583	3.1817
	1218	4.08216	3.03786	2.97274
	1219	4.81428	3.38279	3.07574
	1220	4.30999	3.46444	3.29826
	1221	4.29371	3.10564	3.93255
	1222	4.17555	3.44957	3.23597
	1223	4.01998	3.51478	3.29241
	1224	4.14065	2.98963	3.18224
	1225	4.87508	3.62056	3.02835
	1226	4.0443	3.6419	3.34559
	1227	4.09985	3.32454	3.27533
	1228	4.2545	3.59054	3.18575
	1229	4.23046	3.73234	3.43424
	1230	4.18218	3.51143	3.38808
	1231	4.89177	3.59739	3.39293
	1232	4.6013	3.71363	3.26345
	1233	4.3914	3.83949	3.30238
	1234	4.98146	3.63618	3.61028
	1235	4.32655	3.71907	3.53825
	1236	4.42419	3.81314	2.03096
	1237	4.15441	3.76272	3.29922
	1238	4.49989	3.72789	1.96818
	1239	4.16434	4.07623	1.91243
	1240	4.19268	3.66553	1.97338
	1241	4.74033	3.77564	2.01114
	1242	4.6179	3.77286	1.97552
	1243	4.38536	3.85365	2.08534
	1244	4.09225	3.62869	2.02957
	1245	3.9828	3.91834	2.75679
	1246	3.92082	3.79762	1.95282
	1247	3.89166	3.86403	1.92471
	1248	3.89415	3.80747	2.04626
	1249	3.98223	3.86559	2.75669
	1250	3.94102	3.78929	2.09001
	1251	3.96999	3.95786	1.95536
	1252	3.93545	4.07765	2.96271
	1253	3.66572	3.87986	2.25312
	1254	5.0143	3.86504	2.11282
	1255	3.73157	4.02359	2.05502
	1256	3.67679	4.01535	2.30607
	1257	3.57145	3.84449	1.98121
	1258	4.79129	3.94515	2.10713
	1259	3.73762	3.91746	2.64334
	1260	5.04137	4.07572	2.32798
	1261	5.04843	3.98127	2.10806
	1262	3.67272	3.94491	2.58454
	1263	3.73675	4.03089	2.12128
	1264	4.61136	4.0501	2.19232
	1265	4.5687	4.1131	2.32986
	1266	4.36723	4.10187	2.29929
	1267	4.24622	4.21287	2.74123
	1268	4.22086	4.24359	2.63781
	1269	4.85222	4.07219	2.20856
	1270	4.02801	4.08459	2.51836
	1271	6.7704	4.02863	2.269
	1272	5.62141	4.17144	2.3943
	1273	4.8576	4.11738	2.64912
	1274	4.5198	4.21123	3.31487
	1275	4.61163	4.18694	2.58035
	1276	6.15067	4.32988	2.6433
	1277	6.50883	4.36019	2.51959
	1278	6.25119	4.21918	2.33677
	1279	6.29507	4.25147	2.70465
	1280	6.39365	4.32207	2.62835
	1281	5.91096	4.3472	2.52638
	1282	5.07154	4.33202	2.8147
	1283	5.57361	4.4394	2.76245
	1284	5.34035	4.37949	2.77425
	1285	5.93587	4.45675	2.62373
	1286	5.47691	4.47676	2.66574
	1287	5.55137	4.48027	3.04262
	1288	6.08799	3.89976	2.95499
	1289	5.89901	3.95723	3.93793
	1290	9.64792	3.34336	3.64259
	1291	9.61013	3.2483	3.50466
	1292	9.20826	3.22491	3.50116
	1293	9.26019	3.55295	3.37263
	1294	9.00189	3.23113	3.27191
	1295	8.98078	3.21386	3.1555
	1296	8.95553	3.48814	2.86596
	1297	9.02607	3.25602	2.89017
	1298	8.89676	3.21935	2.86375
	1299	9.77731	3.18148	2.70493
	1300	8.45898	3.1325	4.68194
	1301	8.35573	3.56155	2.62573
	1302	8.13444	3.0971	2.61453
	1303	8.25357	3.07632	4.59094
	1304	7.91058	3.11178	2.39208
	1305	7.87322	3.27883	4.7144
	1306	7.63037	3.13091	2.16984
	1307	7.51001	3.34113	5.06615
	1308	7.67365	3.43053	2.1066
	1309	7.72494	3.09793	2.0097
	1310	7.79074	3.12548	5.11367
	1311	7.767	3.0295	1.94822
	1312	6.88495	3.66973	4.94472
	1313	7.63067	3.73885	5.07247
	1314	7.77373	3.83415	1.87236
	1315	7.50241	3.11179	1.86184
	1316	7.19277	3.67662	1.93346
	1317	7.42077	3.78759	1.82685
	1318	6.88155	3.13514	1.88409
	1319	7.02665	3.10028	1.80982
	1320	7.51099	3.93061	1.76925
	1321	7.30574	3.21306	1.81766
	1322	7.51549	3.84108	1.88529
	1323	7.572	3.36571	5.05135
	1324	6.73178	3.27388	1.83247
	1325	6.96644	3.3003	1.79173
	1326	5.98184	3.15449	1.91736
	1327	6.27568	3.894	4.88609
	1328	5.69483	3.17231	1.81635
	1329	5.55908	4.04375	1.84295
	1330	5.93841	3.1707	1.85467
	1331	5.66509	3.20204	1.89878
	1332	5.53605	4.12528	4.73938
	1333	5.6819	4.06428	1.88622
	1334	5.41309	3.40139	1.92646
	1335	5.48173	3.73615	4.60722
	1336	6.65676	4.02713	1.9627
	1337	5.2389	3.47974	2.02238
	1338	6.53927	3.17961	4.55935
	1339	5.16275	3.81577	2.01441
	1340	4.88349	3.99043	2.00926
	1341	4.9967	3.80097	4.8102
	1342	5.06551	3.48468	2.11197
	1343	6.48827	3.9657	4.17342
	1344	6.15932	3.84523	2.20506
	1345	4.95524	3.54104	2.13045
	1346	6.41954	3.93535	2.32216
	1347	5.09035	4.06915	2.17355
	1348	5.37485	3.72964	2.50422
	1349	6.53049	3.67133	2.4053
	1350	6.03307	3.87016	3.94246
	1351	6.21421	3.84566	2.3728
	1352	5.08331	3.55262	2.6024
	1353	5.99802	3.90657	3.80096
	1354	5.81162	4.0112	3.16426
	1355	5.6357	3.93842	3.36498
	1356	5.16002	3.79487	2.48049
	1357	5.69568	3.85678	3.02163
	1358	5.61162	3.79478	2.70648
	1359	5.88107	3.85786	2.78359
	1360	5.63208	3.74832	4.28482
	1361	5.33095	3.79013	3.64285
	1362	5.36708	3.88213	4.2118
	1363	6.42227	3.96287	4.64515
	1364	7.83018	3.96447	2.86171
	1365	7.82507	3.88108	2.42421
	1366	7.4304	4.05615	2.99728
	1367	7.55014	3.93524	3.89419
	1368	7.12229	3.98141	4.38987
	1369	7.12702	3.87405	3.97353
	1370	7.16277	4.06495	2.58652
	1371	7.35854	3.95205	2.65856
	1372	7.11023	3.89818	4.79281
	1373	7.0751	4.08191	4.66531
	1374	6.91382	4.02429	4.61967
	1375	6.82226	4.03322	4.53475
	1376	6.90947	4.01599	4.52438
	1377	7.48017	4.1042	4.50242
	1378	6.92258	4.10207	4.49644
	1379	7.01394	4.16435	4.2558
	1380	6.68257	4.31034	4.33665
	1381	6.56852	4.59663	4.36588
	1382	7.2189	4.42139	4.19697
	1383	7.34023	3.96062	4.73656
	1384	7.51614	4.14014	4.32893
	1385	7.56857	4.29875	4.26913
	1386	6.4122	4.1719	4.63729
	1387	7.67612	3.99262	4.02563
	1388	7.89542	3.91367	4.63625
	1389	7.63771	3.82566	3.84558
	1390	7.75061	4.00859	4.71306
	1391	8.17625	3.97149	3.83082
	1392	4.91043	3.80989	3.75069
	1393	5.11156	4.04008	4.66322
	1394	5.66291	4.1692	3.71943
	1395	5.52089	4.05353	4.50522
	1396	5.76114	3.69599	4.57814
	1397	5.86888	4.23314	3.60055
	1398	5.10788	4.0602	3.50809
	1399	7.87354	4.11361	3.68108
	1400	6.73137	4.07508	3.49429
	1401	5.00544	3.5688	3.60342
	1402	4.5971	3.9694	3.42726
	1403	4.68339	4.26102	3.29388
	1404	4.89995	3.93354	3.40878
	1405	6.57987	4.18746	3.4484
	1406	4.81611	3.86919	4.42419
	1407	4.89614	3.97156	3.32776
	1408	4.91647	3.96759	3.21275
	1409	4.90529	4.12747	3.39162
	1410	7.8327	3.51551	4.26301
	1411	4.96065	3.86112	3.1356
	1412	7.88279	3.59441	3.17041
	1413	5.51037	4.02326	3.08572
	1414	5.599	3.76961	3.12855
	1415	5.57198	3.86346	4.12308
	1416	5.51252	3.52182	3.03142
	1417	7.87266	3.62525	3.08091
	1418	7.54243	3.94354	4.00865
	1419	5.73574	3.76981	2.99098
	1420	7.86327	3.74364	2.97655
	1421	5.7226	3.57513	3.95138
	1422	5.81423	3.68034	3.02235
	1423	8.02059	3.83806	3.05465
	1424	7.5559	3.91692	4.10096
	1425	7.76859	3.78903	2.99038
	1426	6.50075	3.97097	3.69743
	1427	7.55016	3.58944	2.96392
	1428	7.42365	3.94953	3.02748
	1429	7.23758	3.49231	2.97086
	1430	6.61892	3.67717	3.01563
	1431	7.35107	3.5809	2.98797
	1432	7.25378	3.81263	2.97452
	1433	7.57587	3.51138	3.56093
	1434	7.36168	3.54204	3.33219
	1435	6.79307	3.63571	3.00693
	1436	6.99765	3.56175	3.48389
	1437	6.83812	3.53257	3.18157
	1438	4.01333	3.54328	3.26216
	1439	3.92515	3.58237	2.99655
	1440	4.45482	3.56753	3.1271
	1441	3.58542	3.81573	3.03599
	1442	3.49959	3.94777	3.05366
	1443	3.4876	3.59028	3.75521
	1444	3.51877	3.71411	3.39012
	1445	3.28458	3.76774	3.71273
	1446	3.22262	3.61939	3.98498
	1447	3.22173	3.82032	3.08435
	1448	3.57705	3.71215	3.05402
	1449	3.74776	3.9099	3.13222
	1450	3.41128	3.97385	3.52821
	1451	3.17423	4.09108	3.83313
	1452	3.21175	4.48092	3.58057
	1453	3.26234	4.5861	3.15009
	1454	3.16554	4.36732	3.29608
	1455	3.19886	4.22526	3.93139
	1456	3.15396	4.31579	3.85302
	1457	3.65088	4.2001	3.83034
	1458	3.16149	4.21886	3.70173
	1459	3.32473	4.1258	3.73198
	1460	3.45098	4.21632	3.73073
	1461	3.70164	4.28618	3.75572
	1462	3.71393	4.03715	3.50647
	1463	3.0503	4.12241	3.60972
	1464	3.58361	3.93461	3.65942
	1465	3.82985	4.15569	3.4747
	1466	3.26248	3.89274	3.81151
	1467	3.32468	3.86223	3.70928
	1468	3.74996	3.8039	3.61704
	1469	3.89514	4.10921	3.72336
	1470	3.47834	4.04631	3.36202
	1471	3.32341	3.99945	3.76829
	1472	3.64654	3.77378	3.21762
	1473	3.4103	3.80004	3.95672
	1474	3.63963	3.94372	3.23872
	1475	4.02728	4.05278	3.19226
	1476	3.30179	4.1629	3.95163
	1477	2.91022	3.90588	3.21348
	1478	3.68245	3.923	3.79675
	1479	3.96873	3.56899	3.887
	1480	3.73448	4.04237	3.13046
	1481	3.02118	3.7383	2.94988
	1482	3.68143	3.89043	3.36513
	1483	3.75817	3.53292	3.06073
	1484	3.09692	3.44218	3.23989
	1485	3.67909	3.7966	3.03189
	1486	4.16418	3.54418	2.89698
	1487	3.77707	3.41078	3.05526
	1488	3.82899	3.28126	3.20234
	1489	4.01567	3.40674	3.74003
	1490	3.93093	3.29115	3.05097
	1491	4.06201	3.5265	2.90059
	1492	3.94532	3.10102	3.22007
	1493	4.1232	3.38826	3.5493
	1494	3.99147	2.85044	2.87079
	1495	4.09776	2.57681	2.94953
	1496	4.23413	2.97582	2.86922
	1497	4.0975	2.75185	2.98766
	1498	4.15161	2.61039	3.39321
	1499	4.05837	2.69314	2.81925
	1500	4.41129	2.31892	2.96368
	1501	4.19182	2.42203	3.27168
	1502	4.38544	3.1282	2.81624
	1503	4.10134	2.26251	2.83059
	1504	4.28504	2.1738	3.21585
	1505	4.19358	2.48672	2.96162
	1506	4.27262	2.42781	3.02024
	1507	4.42905	2.11627	3.39251
	1508	4.52714	2.34414	2.94792
	1509	3.43851	2.55232	2.94607
	1510	3.3572	2.57756	2.83922
	1511	3.33651	2.36466	3.0767
	1512	4.11903	2.1981	2.82609
	1513	3.39906	2.21098	3.05587
	1514	3.59602	2.35358	2.74511
	1515	4.06181	2.61527	2.77666
	1516	4.13743	2.38587	2.83473
	1517	3.52814	2.72516	3.69033
	1518	3.60696	7.07984	2.72483
	1519	4.14569	4.09138	2.77374
	1520	3.46229	4.42383	2.65207
	1521	3.69167	3.53073	2.6857
	1522	4.1038	7.44381	2.84468
	1523	4.17181	3.54007	2.69414
	1524	4.30599	3.88838	2.78312
	1525	4.23532	3.46821	2.73774
	1526	4.44269	3.53237	3.0244
	1527	3.82995	3.79851	2.79693
	1528	4.07974	3.58051	2.99516
	1529	4.25013	3.62934	3.28462
	1530	4.46274	3.79138	2.82628
	1531	8.3498	3.89104	3.1174
	1532	8.17241	3.71982	2.85335
	1533	7.96521	3.65116	2.91118
	1534	8.07396	3.17503	3.17443
	1535	7.87322	3.62144	3.05549
	1536	8.54048	3.96319	3.31915
	1537	8.45062	4.15081	3.63618
	1538	7.96807	3.49071	4.78005
	1539	8.03723	3.95532	4.47406
	1540	7.22481	3.57507	4.57005
	1541	8.51891	4.00069	4.37163
	1542	8.32906	3.41811	5.1261
	1543	8.12949	3.63036	5.38429
	1544	8.29854	3.21425	4.52536
	1545	7.12718	3.29818	4.87529
	1546	8.90855	3.60858	4.63079
	1547	8.24156	3.57953	4.05095
	1548	8.26356	3.98496	5.18255
	1549	8.25922	3.67896	5.04706
	1550	7.59006	3.24338	4.30864
	1551	8.27571	3.69158	4.25652
	1552	8.23398	3.25258	4.86104
	1553	6.11879	3.27509	4.00738
	1554	7.72609	3.32901	3.98521
	1555	7.15227	3.35928	5.03367
	1556	7.15821	3.58643	3.8804
	1557	7.95904	3.40596	5.72612
	1558	7.05942	3.45538	4.18312
	1559	6.96812	3.56697	5.93774
	1560	7.14886	4.31588	4.6509
	1561	7.04225	4.13866	5.56888
	1562	6.97352	3.95449	5.15386
	1563	6.96601	3.94571	5.01289
	1564	6.87661	3.82938	3.8177
	1565	7.01419	3.79738	4.1551
	1566	7.37502	3.65828	3.83293
	1567	6.98502	3.63111	5.17914
	1568	6.83661	3.60805	5.43005
	1569	6.92356	3.5435	5.2805
	1570	7.40579	3.62908	5.6476
	1571	6.9566	3.52922	3.67278
	1572	6.94829	3.5667	5.45643
	1573	7.1292	3.88103	5.76763
	1574	7.28518	3.48836	5.23591
	1575	7.22366	3.60046	3.57764
	1576	7.07995	3.87965	5.74391
	1577	7.20272	3.75374	5.13684
	1578	7.23146	3.65802	5.39263
	1579	7.25152	3.50051	3.51581
	1580	3.99486	3.63727	5.04605
	1581	3.89228	3.66547	5.21344
	1582	3.76677	3.47688	5.281
	1583	3.4486	3.63472	4.87222
	1584	3.43293	3.53909	5.4219
	1585	3.21559	3.81669	5.02043
	1586	3.17509	4.03082	5.12142
	1587	3.24974	4.2043	4.90626
	1588	3.06679	3.77982	4.78058
	1589	3.11637	3.90945	4.97112
	1590	3.04493	3.97364	4.80374
	1591	3.12412	3.84528	5.13205
	1592	3.14227	3.77	5.00737
	1593	3.97282	3.88564	5.10401
	1594	2.9276	3.84731	3.06151
	1595	2.90279	3.92302	3.09396
	1596	2.88176	3.89422	5.07033
	1597	2.86904	3.97969	3.00026
	1598	2.85974	3.94165	4.99747
	1599	2.84986	4.02885	2.86581
	1600	2.82928	4.71429	4.84428
	1601	2.82496	4.04858	2.89433
	1602	2.84386	4.13515	2.87578
	1603	2.95131	4.15721	2.88121
	1604	2.8225	4.17663	2.92446
	1605	2.89833	4.40841	4.15526
	1606	4.38033	4.26793	3.48007
	1607	3.03729	4.3297	3.40881
	1608	2.97323	4.21355	3.29875
	1609	3.13851	4.29812	3.29888
	1610	2.81566	4.2601	3.2766
	1611	3.13627	4.09464	3.61856
	1612	3.13282	3.94697	3.88879
	1613	3.5073	4.04162	3.25621
	1614	3.18998	3.91123	3.443
	1615	3.84002	3.89294	3.29828
	1616	4.56527	4.09795	3.26874
	1617	3.40924	4.34064	3.73944
	1618	3.76696	4.20906	3.6296
	1619	3.48787	3.914	3.17756
	1620	3.71851	3.96148	3.17559
	1621	3.77934	3.94036	3.49956
	1622	4.10515	3.94272	3.20211
	1623	3.89159	3.9623	3.14822
	1624	3.97765	4.16368	3.65684
	1625	4.34566	4.02047	3.23732
	1626	4.48186	4.09229	4.38753
	1627	4.38281	4.10178	3.12832
	1628	4.50001	4.14891	4.61026
	1629	4.46686	4.26369	3.35303
	1630	4.63509	4.04309	4.2332
	1631	4.41272	4.07744	3.81645
	1632	4.61665	4.1933	3.6842
	1633	4.51779	4.05356	3.11139
	1634	4.61093	4.23387	3.11189
	1635	4.30998	4.20765	3.08025
	1636	4.5104	4.18276	3.87425
	1637	4.65305	4.25814	4.14097
	1638	4.62363	4.3754	4.00072
	1639	4.68712	4.33402	4.38094
	1640	4.52964	4.34455	3.05926
	1641	4.2709	4.54605	4.22612
	1642	4.46753	4.52701	4.5533
	1643	4.3484	3.77085	4.04604
	1644	4.4405	3.69561	3.06549
	1645	4.37659	3.64302	4.58937
	1646	4.3736	3.81699	3.94728
	1647	4.38438	3.88181	4.24826
	1648	4.42198	3.60771	3.04311
	1649	4.4535	3.71377	3.92439
	1650	5.02064	3.91658	4.07833
	1651	4.51227	3.89516	4.19962
	1652	4.5938	3.75395	3.8139
	1653	4.98447	4.09872	4.38594
	1654	4.8096	3.48303	3.98062
	1655	5.93399	3.36844	4.09683
	1656	5.43543	4.36052	3.87652
	1657	5.57803	4.16192	3.79311
	1658	5.72914	3.24303	3.99592
	1659	5.09309	3.21937	3.86555
	1660	5.09434	3.21899	4.42108
	1661	5.51643	3.18142	4.35324
	1662	5.68872	3.28086	4.46968
	1663	4.73635	4.1011	3.82633
	1664	5.91477	3.25132	3.92914
	1665	6.56337	3.14856	4.54934
	1666	5.63718	3.16726	3.88152
	1667	4.67711	3.17852	4.57036
	1668	4.63402	4.20001	3.83974
	1669	4.58856	3.37335	4.53855
	1670	5.97861	4.01356	4.0017
	1671	4.61636	3.43754	3.94243
	1672	4.48745	3.96934	3.98815
	1673	6.16801	3.96211	4.14905
	1674	6.0783	3.92142	4.26916
	1675	4.07132	4.38122	4.39937
	1676	4.09353	3.72436	2.97727
	1677	3.6676	3.80477	2.93521
	1678	3.66371	3.87441	2.84829
	1679	6.24912	4.18656	2.95864
	1680	3.64054	3.83437	2.80171
	1681	6.16535	4.0189	2.88362
	1682	3.62392	4.00063	2.73222
	1683	3.65235	4.28228	2.71977
	1684	6.47249	4.26047	2.71726
	1685	6.36093	4.04589	3.19754
	1686	3.62656	4.14005	2.76357
	1687	3.73326	4.12108	2.70719
	1688	3.59871	3.92117	2.72125
	1689	6.0026	3.96803	2.77537
	1690	3.61008	3.88188	2.64115
	1691	3.68172	3.89233	3.06949
	1692	6.00111	3.99607	2.94772
	1693	5.99989	3.86354	2.68173
	1694	3.73252	3.65884	3.24735
	1695	6.19331	3.75965	3.07
	1696	6.11595	3.78749	2.69307
	1697	3.85673	3.75287	3.24799
	1698	3.90036	3.56236	2.60201
	1699	6.08035	3.78761	2.95611
	1700	6.06074	3.87523	2.71407
	1701	6.14844	3.79229	2.6593
	1702	4.21521	3.97541	2.98629
	1703	4.31631	3.58273	2.63021
	1704	4.44131	3.64068	2.88818
	1705	4.53169	3.4755	2.72441
	1706	4.47843	3.83202	2.86845
	1707	4.50595	3.56704	2.7807
	1708	4.55947	3.78177	3.01964
	1709	4.57012	3.62457	2.95444
	1710	6.04566	3.85094	2.89726
	1711	6.11944	3.7225	3.13528
	1712	6.11603	4.09403	2.77821
	1713	5.60173	3.68663	3.03823
	1714	6.1655	3.94533	3.14923
	1715	5.64748	3.95543	2.72631
	1716	4.97371	4.16227	2.88928
	1717	5.66388	3.95162	3.01896
	1718	6.10428	3.8705	2.70922
	1719	5.94735	3.70865	2.78781
	1720	6.17259	4.25552	2.85421
	1721	5.87674	3.69877	2.6659
	1722	5.75944	3.74343	2.97548
	1723	5.22229	4.00819	2.74228
	1724	5.98597	3.99552	2.80238
	1725	5.95001	3.87519	2.69745
	1726	5.28059	3.73726	2.67458
	1727	5.9874	3.74694	2.76635
	1728	6.40702	3.70048	2.72342
	1729	5.74749	3.60683	3.24828
	1730	6.04579	3.61033	3.27041
	1731	6.62435	3.73877	3.38397
	1732		3.6457	4.33842
	1733		3.72013	4.47318
	1734		3.7318	3.57695
	1735		3.63026	4.37955
	1736		3.69738	3.6951
	1737		3.626	4.27142
	1738		3.74281	3.80515
	1739		4.00073	4.48728
	1740		3.70101	4.40581
	1741		3.7919	4.46369
	1742		3.86775	4.67748
	1743		3.77345	4.0694
	1744		3.73701	4.82675
	1745		3.7869	4.4909
	1746		3.88293	4.35339
	1747		3.86357	3.95771
	1748		4.09325	4.17424
	1749		4.04593	4.3648
	1750		3.80564	3.66093
	1751		4.08783	4.27764
	1752		4.15561	3.56671
	1753		3.74208	3.49581
	1754		3.78773	4.08463
	1755		3.8264	3.54749
	1756		4.09482	3.37331
	1757		3.94848	3.46376
	1758		3.88757	4.66093
	1759		4.52481	3.16219
	1760		3.82807	4.78736
	1761		3.97206	3.22575
	1762		4.25412	4.59426
	1763		3.85457	3.26049
	1764		3.86972	3.0966
	1765		3.93212	4.62439
	1766		4.15591	3.04878
	1767		3.93173	3.04359
	1768		3.92975	3.02581
	1769		4.01615	3.01401
	1770		3.99418	2.97699
	1771		3.99396	4.69562
	1772		4.03783	2.89527
	1773		4.17763	4.99974
	1774		3.58346	2.86843
	1775		3.32402	2.8728
	1776		3.48017	4.95477
	1777		3.41885	4.65175
	1778		3.27684	2.86239
	1779		3.26143	4.60776
	1780		3.25627	2.85985
	1781		3.21948	2.86761
	1782		3.20793	2.87878
	1783		3.21731	2.87775
	1784		3.1894	4.59076
	1785		3.21609	2.90014
	1786		3.1689	2.89741
	1787		3.32067	2.92804
	1788		3.73124	2.92487
	1789		3.22751	2.97948
	1790		3.22501	2.96606
	1791		3.08991	2.97131
	1792		3.13714	4.81663
	1793		3.11547	4.58763
	1794		3.10361	2.98616
	1795		3.10016	4.47097
	1796		3.46016	3.05366
	1797		3.08671	3.0669
	1798		3.1746	3.07773
	1799		3.06644	3.11381
	1800		3.6246	4.52078
	1801		3.00641	3.19632
	1802		3.07917	3.35111
	1803		3.12392	3.2945
	1804		2.95746	3.19893
	1805		2.94956	4.36726
	1806		2.93891	4.13138
	1807		2.94222	3.48008
	1808		2.90298	3.34596
	1809		3.39541	3.27513
	1810		2.95498	3.63329
	1811		3.63721	3.39585
	1812		3.49561	3.86262
	1813		3.08122	3.71827
	1814		2.86178	3.63237
	1815		2.9474	3.5146
	1816		2.85695	4.47531
	1817		3.64114	4.1677
	1818		3.13954	4.09731
	1819		2.80549	3.76457
	1820		2.9973	4.02764
	1821		3.16195	3.61855
	1822		2.77682	3.31689
	1823		3.48707	3.27604
	1824		3.88643	3.0837
	1825		3.96701	3.18666
	1826		2.93981	3.32591
	1827		3.74028	3.00827
	1828		2.80874	3.26142
	1829		2.73117	3.01006
	1830		2.75697	3.00426
	1831		3.59133	3.22261
	1832		3.68424	3.00042
	1833		2.75304	3.01823
	1834		3.71115	3.00109
	1835		2.68114	3.66095
	1836		3.63109	3.13932
	1837		3.40639	3.88106
	1838		2.86844	3.04948
	1839		3.51491	3.71804
	1840		2.7548	3.04009
	1841		2.82397	3.16225
	1842		2.94612	3.82732
	1843		3.62948	3.29132
	1844		3.46343	3.21085
	1845		3.42172	3.3559
	1846		3.01766	3.42602
	1847		2.93279	3.33112
	1848		2.73219	4.10805
	1849		2.85694	3.50024
	1850		2.76375	4.47005
	1851		3.62486	3.64206
	1852		2.93054	3.6784
	1853		2.86394	4.56677
	1854		3.0768	4.2874
	1855		3.21279	3.75846
	1856		3.92121	4.32135
	1857		2.82912	3.81591
	1858		2.74571	3.90639
	1859		2.81094	3.9794
	1860		3.78993	3.94515
	1861		2.77142	4.44259
	1862		3.02734	3.95499
	1863		3.93187	4.05493
	1864		3.85841	4.15169
	1865		3.90615	4.1068
	1866		3.77592	4.29289
	1867		3.14142	4.11299
	1868		3.81027	4.25652
	1869		2.87105	4.77736
	1870		3.95436	4.60152
	1871		3.92332	4.23819
	1872		3.82786	4.66435
	1873		3.06797	4.29457
	1874		3.26421	4.38882
	1875		3.13962	4.37658
	1876		3.15183	4.33094
	1877		3.86126	4.8229
	1878		3.39613	4.33983
	1879		3.7333	4.36685
	1880		3.36885	4.39713
	1881		3.7803	4.44031
	1882		3.45701	4.81802
	1883		3.6371	4.67311
	1884		3.69164	4.45155
	1885		3.67807	4.58669
	1886		3.6855	4.62841
	1887		3.68819	4.47096
	1888		3.82922	4.5721
	1889		3.83555	4.61627
	1890		3.87312	4.51939
	1891		4.01575	4.56467
	1892		3.9794	4.579
	1893		3.99659	4.98088
	1894		4.28334	4.81449
	1895		2.58224	4.77226
	1896		2.77986	4.66394
	1897		2.46756	4.79357
	1898		2.76069	4.99088
	1899		2.39684	2.54699
	1900		2.38625	2.53359
	1901		2.46391	2.58852
	1902		2.3835	2.54216
	1903		2.5312	2.53537
	1904		2.30238	2.76956
	1905		2.58378	2.53453
	1906		2.46371	2.8714
	1907		2.34485	2.89342
	1908		2.28417	2.56513
	1909		2.60662	2.80967
	1910		2.46284	3.02275
	1911		2.36523	2.88407
	1912		2.75632	2.62174
	1913		2.21157	3.37626
	1914		2.19284	2.74595
	1915		2.33005	3.11073
	1916		2.38409	2.69426
	1917		2.60251	3.02561
	1918		2.96275	3.38131
	1919		2.55177	2.79424
	1920		2.59554	3.61045
	1921		2.88864	3.44086
	1922		2.33809	3.70376
	1923		2.7119	3.80405
	1924		2.25809	3.62084
	1925		2.12507	3.17803
	1926		2.32101	3.81807
	1927		2.69495	3.5054
	1928		2.51222	4.00682
	1929		2.43917	4.06412
	1930		2.68748	3.73455
	1931		2.07078	3.5537
	1932		2.40456	4.163
	1933		2.60527	3.66954
	1934		3.0202	4.22504
	1935		2.58513	4.35481
	1936		2.56614	4.44959
	1937		2.68508	4.39533
	1938		2.67379	3.92275
	1939		2.65962	4.39348
	1940		2.72216	4.54794
	1941		2.70652	4.67841
	1942		3.09095	4.61146
	1943		2.90826	4.86858
	1944		2.91088	4.5904
	1945		3.11747	4.82077
	1946		2.82916	4.29346
	1947		2.7714	4.22324
	1948		3.0236	4.78451
	1949		2.74377	4.44385
	1950		2.94931	4.81992
	1951		2.71197	4.97076
	1952		2.77429	4.93688
	1953		2.81187	4.84187
	1954		2.70474	4.66457
	1955		2.95067	4.82521
	1956		2.88616	4.8201
	1957		3.07043	4.87507
	1958		2.82755	4.96387
	1959		3.19063	4.78269
	1960		2.93842	4.73859
	1961		2.9136	4.89649
	1962		2.83405	5.11224
	1963		2.86204	5.20341
	1964		3.09783	4.86993
	1965		2.93076	5.07714
	1966		3.0559	4.9553
	1967		3.22558	4.89896
	1968		3.05523	4.9977
	1969		3.04353	5.05252
	1970		3.14073	4.97392
	1971		3.10695	4.98306
	1972		3.20664	4.98557
	1973		3.28883	5.08004
	1974		3.19213	5.10887
	1975		3.21557	5.55751
	1976		4.20295
	1977		4.48429
	1978		4.32203
	1979		3.61077
	1980		3.59979
	1981		3.47947
	1982		3.70426
	1983		3.41317
	1984		3.52259
	1985		3.52287
	1986		3.44517
	1987		3.33319
	1988		3.37684
	1989		3.31485
	1990		3.50264
	1991		3.45576
	1992		3.42159
	1993		3.54358
	1994		3.93868
	1995		3.3217
	1996		3.344
	1997		3.53444
	1998		3.36575
[truncated: 299 more rows]

## Sheet: Figure 5K
	4% GM-1 LUV	Distance of non-coloc dots from coloc dots (average per cell)
	Time	cell 1	cell 2	cell 3	cell 4	cell 5	cell 6	cell 7	cell 8	cell 9	cell 10	cell 11	cell 12	cell 13	cell 14	cell 15	average	SD
	5	9.47208	9.67832	8.97924	10.1498	12.2984	11.4648	7.88142	8.45309	12.862	12.8059	6.99522	9.98471				10.0854	1.92499
	30	6.03608	8.01804	5.29514	10.3087	7.54479	7.34001	6.30158	6.13988	7.0481	7.24223	6.522	7.61026	6.27908	6.51124		7.01408	1.20502
	60	5.80134	4.2265	4.18279	4.26262	6.28954	5.8272	7.62301	7.32588	6.43004	6.40018	3.99286	4.70923	5.14302	5.29985	7.43245	5.6631	1.24284
	0,5 % GM-1 LUV	Distance of non-coloc dots from coloc dots (average per cell)
	Time	cell 1	cell 2	cell 3	cell 4	cell 5	cell 6	cell 7	cell 8	cell 9	cell 10	cell 11	cell 12	cell 13	cell 14	cell 15	cell 16	average	SD
	5	8.96514	7.9678	10.2081	7.82454	9.0109	9.40467	9.37565	8.47691	7.68091	8.67985	10.8354						0.983267	0.983267
	30	8.03234	8.27047	8.6122	10.9301	9.28504	9.08345	7.42148	8.06961	6.50859	10.5782	9.80399	12.8975	9.85845	13.4075	10.7078	10.638	1.87449	1.87449
	60	6.07395	4.61787	6.6919	5.56994	6.67477	3.68262	5.23325	5.86513	7.09329	7.4153	5.64382	6.84944	3.61781	6.91235			1.21726	1.21726
	Table Analyzed (Two way ANOVA)							Bonferroni multiple comparisons
								Compare each cell mean with the other cell mean in that column
	Two-way ANOVA	Ordinary
	Alpha	0.05						Number of families	2
								Number of comparisons per family	3
	Source of Variation	% of total variation	P value	P value summary	Significant?			Alpha	0.05
	Interaction	11.49	<0,0001	****	Yes
	Time	46.32	<0,0001	****	Yes			Bonferroni's multiple comparisons test	Predicted (LS) mean diff,	95,00% CI of diff,	Below threshold?	Summary	Adjusted P Value
	GM-1 concentration	1.474	0.0918	ns	No
								4% GM-1
	ANOVA table	SS (Type III)	DF	MS	F (DFn, DFd)	P value		5 vs. 30	3.071	1,661 to 4,481	Yes	****	<0,0001
	Interaction	48.71	2	24.35	F (2, 76) = 11,36	P<0,0001		5 vs. 60	4.422	3,034 to 5,810	Yes	****	<0,0001
	Time	196.4	2	98.2	F (2, 76) = 45,81	P<0,0001		30 vs. 60	1.351	0,01906 to 2,683	Yes	*	0.0457
	GM-1 concentration	6.25	1	6.25	F (1, 76) = 2,916	P=0,0918
	Residual	162.9	76	2.143				0.5 % GM-1
								5 vs. 30	-0.6834	-2,087 to 0,7204	No	ns	0.7112
	Difference between column means							5 vs. 60	3.095	1,651 to 4,539	Yes	****	<0,0001
	Predicted (LS) mean of 4% GM-1	7.588						30 vs. 60	3.779	2,467 to 5,090	Yes	****	<0,0001
	Predicted (LS) mean of 0.5 % GM-1	8.144
	Difference between predicted means	-0.5567
	SE of difference	0.326						Test details	Predicted (LS) mean 1	Predicted (LS) mean 2	Predicted (LS) mean diff,	SE of diff,	N1	N2	t	DF
	95% CI of difference	-1,206 to 0,09261
								4% GM-1
	Data summary							5 vs. 30	10.09	7.014	3.071	0.576	12	14	5.333	76
	Number of columns (GM-1 concentration)	2						5 vs. 60	10.09	5.663	4.422	0.567	12	15	7.799	76
	Number of rows (Time)	3						30 vs. 60	7.014	5.663	1.351	0.5441	14	15	2.483	76
	Number of values	82
								0.5 % GM-1
								5 vs. 30	8.948	9.632	-0.6834	0.5734	11	16	1.192	76
								5 vs. 60	8.948	5.853	3.095	0.5899	11	14	5.247	76
								30 vs. 60	9.632	5.853	3.779	0.5358	16	14	7.052	76
