# Supplementary material for: Actin-regulated Siglec-1 nanoclustering influences HIV-1 capture and virus-containing compartment formation in dendritic cells
Source: eLife journal article supplement (doi:10.7554/elife.78836), 2023-03-20
Supplement: fig6-data1 [file Figure 6-source data 1.xlsx]

## Sheet: Figure 6B
	distance from cell base	Area in um2 (5 min VLP mDC )							distance from cell base	Area in um2 (30 min VLP mDC)							distance from cell base	Area in um2 (60 min VLP mDC )
		Experiment 1	Experiment 2	Experiment 3	Experiment 4	average	SEM			Experiment 1	Experiment 2	Experiment 3	Experiment 4	average	SEM			Experiment 1	Experiment 2	Experiment 3	average	SEM
	2	465.358	242.749	210.861	217.25	284.054	60.8257		2	159.056	144.12	166.014	84.1715	138.34	18.6249		2	105.077	151.89	86.4256	114.464	19.472
	4	178.722	175.518	148.674	83.274	146.547	22.1408		4	118.419	135.186	132.402	97.298	120.826	8.65812		4	92.1097	146.191	77.4444	105.248	20.9045
	6	146.513	145.971	125.095	87.9116	126.373	13.7557		6	114.168	156.714	157.461	120.585	137.232	11.5393		6	101.962	164.289	95.3339	120.528	21.9639
	8	123.877	126.387	89.0093	75.7648	103.759	12.6425		8	129.167	162.289	171.535	111.436	143.607	14.0609		8	113.223	161.497	103.79	126.17	17.8722
	10	104.603	85.5775	100.882	57.3249	87.0968	10.7439		10	124.219	157.662	161.855	106.027	137.441	13.4371		10	106.442	160.34	102.231	123.004	18.7074
	12	94.9575	108.413	58.5925	39.2003	75.2908	15.9823		12	93.3453	161.679	128.475	60.0726	110.893	21.9449		12	86.3595	119.541	71.4451	92.4487	14.2141
	14		112.169	31.457	24.914	56.1799	24.299		14	70.4633	118.621	87.8284	55.784	83.1743	13.5091		14	67.4969	113.032	43.2268	74.5852	20.4603
	16				20.015	20.015	#DIV/0!		16	63.2222	70.22	85.4339	106.693	81.3923	9.6239		16	49.4316	78.0614	17.8379	48.4436	17.392
	Number of cells analysed	10 cells	15 cells	13 cells	15 cells		#DIV/0!		Number of cells analysed	13 cells	13 cells	14 cells	7 cells		#DIV/0!		Number of cells analysed	11 cells	9 cells	17 cells	#DIV/0!
	Table Analyzed (Two way ANOVA) 5 minutes vs. 30 minutes										Table Analyzed (Two way ANOVA) 5 minutes vs. 60 minutes										Table Analyzed (Two way ANOVA) 30 minutes vs. 60 minutes
	Two-way ANOVA	Ordinary									Two-way ANOVA	Ordinary									Two-way ANOVA	Ordinary
	Alpha	0.05									Alpha	0.05									Alpha	0.05
	Source of Variation	% of total variation	P value	P value summary	Significant?						Source of Variation	% of total variation	P value	P value summary	Significant?						Source of Variation	% of total variation	P value	P value summary	Significant?
	Interaction	23.83	0.0009	***	Yes						Interaction	21.63	0.0065	**	Yes						Interaction	0.8274	0.9983	ns	No
	Row Factor	43.6	<0,0001	****	Yes						Row Factor	36.61	0.0001	***	Yes						Row Factor	42.88	0.0004	***	Yes
	Column Factor	0.2399	0.5796	ns	No						Column Factor	0.6493	0.4016	ns	No						Column Factor	6.203	0.0311	*	Yes
	ANOVA table	SS (Type III)	DF	MS	F (DFn, DFd)	P value					ANOVA table	SS (Type III)	DF	MS	F (DFn, DFd)	P value					ANOVA table	SS (Type III)	DF	MS	F (DFn, DFd)	P value
	Interaction	59021	7	8432	F (7, 44) = 4,421	P=0,0009					Interaction	53999	7	7714	F (7, 36) = 3,429	P=0,0065					Interaction	626.2	7	89.46	F (7, 40) = 0,09511	P=0,9983
	Row Factor	108015	7	15431	F (7, 44) = 8,090	P<0,0001					Row Factor	91406	7	13058	F (7, 36) = 5,804	P=0,0001					Row Factor	32456	7	4637	F (7, 40) = 4,929	P=0,0004
	Column Factor	594.2	1	594.2	F (1, 44) = 0,3115	P=0,5796					Column Factor	1621	1	1621	F (1, 36) = 0,7206	P=0,4016					Column Factor	4695	1	4695	F (1, 40) = 4,991	P=0,0311
	Residual	83922	44	1907							Residual	80989	36	2250							Residual	37626	40	940.7
	Difference between column means										Difference between column means										Difference between column means
	Predicted (LS) mean of 30 min	119.1									Predicted (LS) mean of 60 min (no sac)	100.6									Predicted (LS) mean of 60 min (no sac)	100.6
	Predicted (LS) mean of 5 min	112.4									Predicted (LS) mean of 5 min	112.4									Predicted (LS) mean of 30 min	119.1
	Difference between predicted means	6.699									Difference between predicted means	-11.8									Difference between predicted means	-18.5
	SE of difference	12									SE of difference	13.9									SE of difference	8.282
	95% CI of difference	-17,49 to 30,89									95% CI of difference	-40,00 to 16,40									95% CI of difference	-35,24 to -1,763
	Data summary										Data summary										Data summary
	Number of columns (Column Factor)	2									Number of columns (Column Factor)	2									Number of columns (Column Factor)	2
	Number of rows (Row Factor)	8									Number of rows (Row Factor)	8									Number of rows (Row Factor)	8
	Number of values	60									Number of values	52									Number of values	56
	Bonferroni multiple comparison test 5 minutes vs. 30 minutes										Bonferroni multiple comparison test 5 minutes vs. 30 minutes										Bonferroni multiple comparison test 5 minutes vs. 30 minutes
	Number of families	1									Number of families	1									Number of families	1
	Number of comparisons per family	8									Number of comparisons per family	8									Number of comparisons per family	8
	Alpha	0.05									Alpha	0.05									Alpha	0.05
	Bonferroni's multiple comparisons test	Predicted (LS) mean diff,	95,00% CI of diff,	Below threshold?	Summary	Adjusted P Value					Bonferroni's multiple comparisons test	Predicted (LS) mean diff,	95,00% CI of diff,	Below threshold?	Summary	Adjusted P Value					Bonferroni's multiple comparisons test	Predicted (LS) mean diff,	95,00% CI of diff,	Below threshold?	Summary	Adjusted P Value
	30 min - 5 min										60 min (no sac) - 5 min										60 min (no sac) - 30 min
	2	-145.7	-234,4 to -57,02	Yes	***	0.0002					2	-169.6	-274,8 to -64,37	Yes	***	0.0003					2	-23.88	-91,50 to 43,74	No	ns	>0,9999
	4	-25.72	-114,4 to 62,98	No	ns	>0,9999					4	-41.3	-146,5 to 63,92	No	ns	>0,9999					4	-15.58	-83,20 to 52,04	No	ns	>0,9999
	6	10.86	-77,84 to 99,56	No	ns	>0,9999					6	-5.845	-111,1 to 99,38	No	ns	>0,9999					6	-16.7	-84,32 to 50,92	No	ns	>0,9999
	8	39.85	-48,85 to 128,5	No	ns	>0,9999					8	22.41	-82,81 to 127,6	No	ns	>0,9999					8	-17.44	-85,06 to 50,18	No	ns	>0,9999
	10	50.34	-38,35 to 139,0	No	ns	0.8815					10	35.91	-69,31 to 141,1	No	ns	>0,9999					10	-14.44	-82,06 to 53,18	No	ns	>0,9999
	12	35.6	-53,09 to 124,3	No	ns	>0,9999					12	17.16	-88,06 to 122,4	No	ns	>0,9999					12	-18.44	-86,06 to 49,17	No	ns	>0,9999
	14	26.99	-68,81 to 122,8	No	ns	>0,9999					14	18.41	-94,08 to 130,9	No	ns	>0,9999					14	-8.589	-76,21 to 59,03	No	ns	>0,9999
	16	61.38	-78,87 to 201,6	No	ns	>0,9999					16	28.43	-130,6 to 187,5	No	ns	>0,9999					16	-32.95	-100,6 to 34,67	No	ns	>0,9999
	Test details	Predicted (LS) mean 1	Predicted (LS) mean 2	Predicted (LS) mean diff,	SE of diff,	N1	N2	t	DF		Test details	Predicted (LS) mean 1	Predicted (LS) mean 2	Predicted (LS) mean diff,	SE of diff,	N1	N2	t	DF		Test details	Predicted (LS) mean 1	Predicted (LS) mean 2	Predicted (LS) mean diff,	SE of diff,	N1	N2	t	DF
	30 min - 5 min										60 min (no sac) - 5 min										60 min (no sac) - 30 min
	2	138.3	284.1	-145.7	30.88	4	4	4.719	44		2	114.5	284.1	-169.6	36.23	3	4	4.681	36		2	114.5	138.3	-23.88	23.42	3	4	1.019	40
	4	120.8	146.5	-25.72	30.88	4	4	0.8329	44		4	105.2	146.5	-41.3	36.23	3	4	1.14	36		4	105.2	120.8	-15.58	23.42	3	4	0.665	40
	6	137.2	126.4	10.86	30.88	4	4	0.3516	44		6	120.5	126.4	-5.845	36.23	3	4	0.1613	36		6	120.5	137.2	-16.7	23.42	3	4	0.7131	40
	8	143.6	103.8	39.85	30.88	4	4	1.29	44		8	126.2	103.8	22.41	36.23	3	4	0.6186	36		8	126.2	143.6	-17.44	23.42	3	4	0.7444	40
	10	137.4	87.1	50.34	30.88	4	4	1.63	44		10	123	87.1	35.91	36.23	3	4	0.9912	36		10	123	137.4	-14.44	23.42	3	4	0.6163	40
	12	110.9	75.29	35.6	30.88	4	4	1.153	44		12	92.45	75.29	17.16	36.23	3	4	0.4736	36		12	92.45	110.9	-18.44	23.42	3	4	0.7874	40
	14	83.17	56.18	26.99	33.36	4	3	0.8093	44		14	74.59	56.18	18.41	38.73	3	3	0.4753	36		14	74.59	83.17	-8.589	23.42	3	4	0.3667	40
	16	81.39	20.02	61.38	48.83	4	1	1.257	44		16	48.44	20.02	28.43	54.77	3	1	0.5191	36		16	48.44	81.39	-32.95	23.42	3	4	1.407	40

## Sheet: Figure 6C
	0,5% GM-1 LUVs	Area in um2 (5 min pulse)															4% GM-1 LUVs	Area in um2 (5 min pulse)
	Distance from cell base	cell 1	cell 2	cell 3	cell 4	cell 5	cell 6	cell 7	cell 8	cell 9	cell 10	cell 11	cell 12	average	SD		Distance from cell base	cell 1	cell 2	cell 3	cell 4	cell 5	cell 6	cell 7	cell 8	cell 9	cell 10	cell 11	cell 12	cell 13	cell 14	cell 15	average	SD
	2	422.034	383.949	403.373	344.222	406.118	310.733	450.622	368.445	526.222	351.522	277.803	448.377	391.118	64.5743		2	469.464	327.549	221.571	210.369	378.7	442.909	230.89	474.606	499.33	310.845	543.395	491.336	352.201	613.357	447.438	400.931	122.793
	4	471.574	337.219	314.721	225.756	305.909	283.319	293.029	253.668	420.273	332.541	233.097	311.041	315.179	68.5673		4	291.041	224.18	171.499	164.661	162.123	284.473	189.977	291.459	298.524	254.376	333.495	331.442	226.393	459.591	394.829	271.871	86.3102
	6	410.488	248.493	299.198	171.815	218.123	238.738	211.439	211.107	266.722	299.489	185.064	198.625	246.608	63.1674		6	210.15	178.455	143.856	146.446	118.427	192.639	151.602	219.005	211.505	175.604	216.131	229.126	182.339	273.177	333.455	198.794	54.3077
	8	281.124	198.977	261.418	151.883	156.29	279.497	162.143	176.15	183.732	263.536	178.733	129.887	201.948	52.0624		8	157.298	135.864	118.647	126.472	97.452	139.664	119.716	160.728	179.097		145.639	167.504	141.679	170.87	268.554	152.085	40.5358
	10	266.134	115.826	179.078	141.484	86.5705	283.814	131.617	145.465	111.448	237.18	143.054	93.883	161.296	63.6487		10		97.227	98.016	97.4745	78.6135		87.197		161.816			120.248	101.498		194.186	115.142	38.2104
	12	239.657			134.369	39.467	280.587		76.3015		213.555	139.596	59.925	147.932	83.0749		12			60.318		54.281										125.469	80.0228	39.4735
	Table Analyzed (Two way ANOVA)
	Two-way ANOVA	Ordinary
	Alpha	0.05
	Source of Variation	% of total variation	P value	P value summary	Significant?
	Interaction	0.9918	0.6133	ns	No
	Distance from cell base	61.2	<0,0001	****	Yes
	GM-1 concentration	2.465	0.0034	**	Yes
	ANOVA table	SS (Type III)	DF	MS	F (DFn, DFd)	P value
	Interaction	19239	5	3848	F (5, 127) = 0,7149	P=0,6133
	Distance from cell base	1187095	5	237419	F (5, 127) = 44,11	P<0,0001
	GM-1 concentration	47824	1	47824	F (1, 127) = 8,886	P=0,0034
	Residual	683522	127	5382
	Difference between column means
	Predicted (LS) mean of 5 min (0,5%)	244
	Predicted (LS) mean of 5 min (4%)	203.1
	Difference between predicted means	40.87
	SE of difference	13.71
	95% CI of difference	13,74 to 68,01
	Data summary
	Number of columns (GM-1 concentration)	2
	Number of rows (Distance from cell base)	6
	Number of values	139
	Bonferroni multiple comparison test
	Number of families	1
	Number of comparisons per family	6
	Alpha	0.05
	Bonferroni's multiple comparisons test	Predicted (LS) mean diff,	95,00% CI of diff,	Below threshold?	Summary	Adjusted P Value
	5 min (0,5%) - 5 min (4%)
	2	-9.812	-85,97 to 66,34	No	ns	>0,9999
	4	43.31	-32,85 to 119,5	No	ns	0.7796
	6	47.81	-28,34 to 124,0	No	ns	0.5692
	8	49.86	-27,49 to 127,2	No	ns	0.5188
	10	46.15	-40,55 to 132,9	No	ns	0.9367
	12	67.91	-65,21 to 201,0	No	ns	>0,9999
	Test details	Predicted (LS) mean 1	Predicted (LS) mean 2	Predicted (LS) mean diff,	SE of diff,	N1	N2	t	DF
	5 min (0,5%) - 5 min (4%)
	2	391.1	400.9	-9.812	28.41	12	15	0.3453	127
	4	315.2	271.9	43.31	28.41	12	15	1.524	127
	6	246.6	198.8	47.81	28.41	12	15	1.683	127
	8	201.9	152.1	49.86	28.86	12	14	1.728	127
	10	161.3	115.1	46.15	32.35	12	9	1.427	127
	12	147.9	80.02	67.91	49.67	8	3	1.367	127
	10	137.4	87.1	50.34	30.88	4	4	1.63	44
	12	110.9	75.29	35.6	30.88	4	4	1.153	44
	14	83.17	56.18	26.99	33.36	4	3	0.8093	44
	16	81.39	20.02	61.38	48.83	4	1	1.257	44

## Sheet: Figure 6D
	0,5% GM-1 LUVs	Area in um2 (30 min pulse)											4% GM-1 LUVs	Area in um2 (30 min pulse)
	Distance from cell base	cell 1	cell 2	cell 3	cell 4	cell 5	cell 6	cell 7	cell 8	average	SD		Distance from cell base	cell 1	cell 2	cell 3	cell 4	cell 5	cell 6	cell 7	average	SD
	2	441.226	400.658	387.143	363.139	496.353	318.817	422.437	465.188	411.87	53.2967		2	91.5795	133.36	69.1975	394.512	235.119	221.394	241.267	198.061	111.436
	4	181.763	177.667	222.503	259.046	345.608	145.194	209.338	204.507	218.203	57.5393		4	87.837	78.782	90.707	285.343	130.306	202.731	224.13	157.119	80.7035
	6	102.735	117.783	173.061	172.018	213.969	41.927	142.781	175.097	142.421	50.3522		6	103.465	97.205	125.369	168.712	118.254	170.825	183.311	138.163	35.308
	8	41.873	81.3607	147.74	125.249	129.345		100.559	130.23	108.051	33.7307		8	110.602	133.177	135.539	115.293	114.394	140.933	191.795	134.533	27.9021
	10			113.288	80.301	87.821		79.101		90.1279	13.7831		10	117.466	121.728	129.402		114.898	116.846	189.978	131.72	29.0056
	Table Analyzed (Two way ANOVA)
	Two-way ANOVA	Ordinary
	Alpha	0.05
	Source of Variation	% of total variation	P value	P value summary	Significant?
	Interaction	19.2	<0,0001	****	Yes
	Row Factor	45.28	<0,0001	****	Yes
	Column Factor	3.811	0.0053	**	Yes
	ANOVA table	SS (Type III)	DF	MS	F (DFn, DFd)	P value
	Interaction	149053	4	37263	F (4, 59) = 10,56	P<0,0001
	Row Factor	351548	4	87887	F (4, 59) = 24,91	P<0,0001
	Column Factor	29585	1	29585	F (1, 59) = 8,385	P=0,0053
	Residual	208161	59	3528
	Difference between column means
	Predicted (LS) mean of 30 min (0,5%)	194.1
	Predicted (LS) mean of 30 min (4%)	151.9
	Difference between predicted means	42.22
	SE of difference	14.58
	95% CI of difference	13,04 to 71,39
	Data summary
	Number of columns (Column Factor)	2
	Number of rows (Row Factor)	5
	Number of values	69
	Bonferroni multiple comparison test
	Number of families	1
	Number of comparisons per family	5
	Alpha	0.05
	Bonferroni's multiple comparisons test	Predicted (LS) mean diff,	95,00% CI of diff,	Below threshold?	Summary	Adjusted P Value
	30 min (0,5%) - 30 min (4%)
	2	213.8	132,0 to 295,6	Yes	****	<0,0001
	4	61.08	-20,74 to 142,9	No	ns	0.2578
	6	4.258	-77,57 to 86,09	No	ns	>0,9999
	8	-26.48	-111,0 to 58,03	No	ns	>0,9999
	10	-41.59	-143,6 to 60,46	No	ns	>0,9999
	Test details	Predicted (LS) mean 1	Predicted (LS) mean 2	Predicted (LS) mean diff,	SE of diff,	N1	N2	t	DF
	30 min (0,5%) - 30 min (4%)
	2	411.9	198.1	213.8	30.74	8	7	6.955	59
	4	218.2	157.1	61.08	30.74	8	7	1.987	59
	6	142.4	138.2	4.258	30.74	8	7	0.1385	59
	8	108.1	134.5	-26.48	31.75	7	7	0.8341	59
	10	90.13	131.7	-41.59	38.34	4	6	1.085	59

## Sheet: Figure 6E
	0,5% GM-1 LUVs	Area in um2 (60 min pulse)																	4% GM-1 LUVs	Area in um2 (60 min pulse)
	Distance from cell base	cell 1	cell 2	cell 3	cell 4	cell 5	cell 6	cell 7	cell 8	cell 9	cell 10	cell 11	cell 12	cell 13	cell 14	average	SD		Distance from cell base	cell 1	cell 2	cell 3	cell 4	cell 5	cell 6	cell 7	cell 8	cell 9	cell 10	cell 11	cell 12	average	SD
	2	241.846	218.31	488.957	207.23	188.934	151.465	172.572	174.643	272.99	170.308	290.606	262.519	111.727	180.149	223.733	91.2041		2	102.701	64.7505	72.812	74.677	66.8295	92.851	360.451	114.803	97.104	118.088	104.745	70.823	111.72	80.5643
	4	108.415	157.793	169.198	254.175	132.57	130.48	94.162	65.926	282.894	98.425	180.686	151.907	107.687	130.459	147.484	60.2761		4	99.501	75.0345	49.667	30.762	139.271	77.804	154.6	111.504	91.411	138.633	39.169	57.145	88.7084	41.2006
	6	110.825	154.047	139.122	236.734	184.774	173.809	115.654	88.573	260.753	101.313	193.843	164.956	114.744	160.737	157.135	50.6492		6	119.97	86.387	39.799	51.492	170.008	105.108	160.239	125.702	126.973	174.75	54.818	65.768	106.751	47.4431
	8	102.565	191.351	113.719	205.929	187.935	175.277	164.995	104.039	223.577	101.596	184.807	205.475	95.2795	163.897	158.603	45.5871		8	133.164	92.1565	44.618	81.27	166.571	126.174	139.508	129.501	173.894	190.073	75.455	81.518	119.492	44.8083
	10	74.3125	244.389	55.8645	166.19	172.686	137.388	175.591	150.707	168.565	104.563	170.409	219.526	59.935	146.46	146.185	55.9331		10	137.788	84.028	100.482	125.176	168.354	145.78	111.761	112.334	185.277	190.701	106.676	106.93	131.274	34.6808
	12	38.002	254.838		128.644	145.469	107.901	192.713	170.36	94.878	74.7455	165.16	188.93	25.7115	136.078	132.572	64.6543		12	121.202	66.2365	145.416	137.233	119.242	149.884	97.98	96.1	178.761	177.285	103.279	122.235	126.238	33.489
	Table Analyzed (Two way ANOVA)
	Two-way ANOVA	Ordinary
	Alpha	0.05
	Source of Variation	% of total variation	P value	P value summary	Significant?
	Interaction	7.125	0.0197	*	Yes
	Row Factor	5.599	0.0588	ns	No
	Column Factor	13.24	<0,0001	****	Yes
	ANOVA table	SS (Type III)	DF	MS	F (DFn, DFd)	P value
	Interaction	45655	5	9131	F (5, 143) = 2,784	P=0,0197
	Row Factor	35879	5	7176	F (5, 143) = 2,188	P=0,0588
	Column Factor	84852	1	84852	F (1, 143) = 25,87	P<0,0001
	Residual	469048	143	3280
	Difference between column means
	Predicted (LS) mean of 60 min (0,5%)	161
	Predicted (LS) mean of 60 min (4%)	114
	Difference between predicted means	46.92
	SE of difference	9.225
	95% CI of difference	28,69 to 65,16
	Data summary
	Number of columns (Column Factor)	2
	Number of rows (Row Factor)	6
	Number of values	155
	Bonferroni multiple comparison test
	Number of families	1
	Number of comparisons per family	6
	Alpha	0.05
	Bonferroni's multiple comparisons test	Predicted (LS) mean diff,	95,00% CI of diff,	Below threshold?	Summary	Adjusted P Value
	60 min (0,5%) - 60 min (4%)
	2	112	51,73 to 172,3	Yes	****	<0,0001
	4	58.78	-1,504 to 119,1	No	ns	0.0603
	6	50.38	-9,896 to 110,7	No	ns	0.1613
	8	39.11	-21,17 to 99,39	No	ns	0.5084
	10	14.91	-45,37 to 75,19	No	ns	>0,9999
	12	6.334	-55,01 to 67,67	No	ns	>0,9999
	Test details	Predicted (LS) mean 1	Predicted (LS) mean 2	Predicted (LS) mean diff,	SE of diff,	N1	N2	t	DF
	60 min (0,5%) - 60 min (4%)
	2	223.7	111.7	112	22.53	14	12	4.972	143
	4	147.5	88.71	58.78	22.53	14	12	2.609	143
	6	157.1	106.8	50.38	22.53	14	12	2.236	143
	8	158.6	119.5	39.11	22.53	14	12	1.736	143
	10	146.2	131.3	14.91	22.53	14	12	0.6618	143
	12	132.6	126.2	6.334	22.93	13	12	0.2763	143

## Sheet: Figure 6G
	Experiment 1	pERM Intensity			Experiment 2	pERM Intensity			Experiment 3	pERM Intensity
	Cell nº	0 min	60 min		Cell nº	0 min	60 min		Cell nº	0 min	60 min
	1	27.5314	19.0748		1	14.6462	11.7678		1	28.4552	27.3531
	2	22.2331	18.832		2	13.6349	9.48177		2	37.1902	29.4498
	3	25.0981	31.571		3	23.268	12.1226		3	27.1015	34.1346
	4	35.0408	26.8276		4	13.7348	8.20201		4	27.6485	26.2549
	5	28.2573	22.1453		5	24.4288	10.1069		5	31.5678	29.2326
	6	38.8732	23.6151		6	10.7562	11.0126		6	27.8005	18.3014
	7	32.9025	26.8834		7	15.6556	10.7562		7	27.1344	28.8497
	8	31.4637	26.579		8	14.017	15.6556		8	32.5472
	9	32.1548	24.3204		9	11.9175	10.5884		9	41.4538
	10	37.5622	31.7837		10	17.8464	12.2399		10	25.4014
	11	32.5574			11	10.0076	11.3539		11	34.1685
	12	39.8934			12	21.8147	10.3975		12	28.9779
	average	31.964	25.1632		13	16.2279	17.8464		13	50.0599
	SD	5.46191	4.49681		14	21.2392	10.9747		14	34.2362
					15	18.5915	24.3692		15	28.7957
					16	16.0694	15.2694		average	32.1693	27.6537
					17	16.6483	14.6462		SD	6.61156	4.80735
					18	14.0943	13.6974
					19	11.4527	10.1152
					20	25.2615	13.9959
					21	18.0478	20.8911
					22	24.7405	14.2146
					23	20.8246	19.9916
					24	22.5885	25.8035
					25	19.7557	9.84947
					26	16.0614	14.1437
					27	20.0279	14.8317
					28	27.2544	12.887
					29	22.0211	18.8568
					30	22.6569	11.8483
					31	18.0453	12.805
					32	19.5794	20.9084
					33	21.2329	16.2136
					34	23.6956	14.5752
					35	31.3353	19.6099
					36	14.0646	22.8326
					37	25.3236	15.5801
					38	13.069	15.801
					39	12.0907	18.508
					40	15.1004	15.2225
					average	18.4707	14.7493
					SD	5.05684	4.30384
		pERM Intensity
	Experiment nº	0 min	60 min
	Experiment 1	31.96	25.16
	Experiment 2	18.47	14.97
	Experiment 3	32.17	27.65
	average	27.5333	22.5933
	SEM	4.53207	3.87885
	Paired T-test
	Column B	60 min
	vs.	vs,
	Column A	0min
	Ratio paired t test
	P value	0.0162
	P value summary	*
	Significantly different (P < 0.05)?	Yes
	One- or two-tailed P value?	Two-tailed
	t, df	t=7,754, df=2
	Number of pairs	3
	How big is the difference?
	Geometric mean of ratios (B / A)	0.8185
	SD of log(ratios)	0.01943
	SEM of log(ratios)	0.01122
	95% confidence interval	0,7324 to 0,9147
	R squared (partial eta squared)	0.9678
	How effective was the pairing?
	Correlation coefficient (r)	0.9912
	P value (one tailed)	0.0423
	P value summary	*
	Was the pairing significantly effective?	Yes

## Sheet: Figure 6H
		mDC
	Time	cell 1	cell 2	cell 3	cell 4	cell 5	cell 6	cell 7	cell 8	cell 9	cell 10	cell 11	cell 12	cell 13	cell 14	cell 15	average	SD
	0 min	28.4552	37.1902	27.1015	27.6485	31.5678	27.8005	27.1344	32.5472	41.4538	25.4014	34.1685	28.9779	50.0599	34.2362	28.7957	32.1693	6.61156
	60 min	27.3531	29.4498	34.1346	26.2549	29.2326	18.3014	28.8497									27.6537	4.80735
		mDC + CN03
	Time	cell 1	cell 2	cell 3	cell 4	cell 5	cell 6	cell 7	cell 8	cell 9	cell 10	cell 11	cell 12	cell 13	cell 14	cell 15	average	SD
	0 min	54.379	41.3754	41.9396	46.0963	49.7062	41.116	60.6365	51.772	51.772							48.7548	6.69177
	60 min	51.0295	36.3081	42.2671	23.7572	29.4911	27.2886	31.8285	30.6549	39.1996	40.8251	44.4016	23.8474	43.8066	29.4265	32.7128	35.123	8.17044
	Table Analyzed (Two-way ANOVA)							Multiple compaison Bonferroni post test
								Number of families	1
	Two-way ANOVA	Ordinary						Number of comparisons per family	2
	Alpha	0.05						Alpha	0.05
	Source of Variation	% of total variation	P value	P value summary	Significant?			Bonferroni's multiple comparisons test	Predicted (LS) mean diff,	95,00% CI of diff,	Below threshold?	Summary	Adjusted P Value
	Interaction	5.082	0.0418	*	Yes
	Time	20.14	0.0001	***	Yes			control - CN03
	Treatment	35.38	<0,0001	****	Yes			0 min	-16.59	-23,42 to -9,749	Yes	****	<0,0001
								60 min	-7.469	-14,89 to -0,04711	Yes	*	0.0483
	ANOVA table	SS (Type III)	DF	MS	F (DFn, DFd)	P value
	Interaction	214.6	1	214.6	F (1, 42) = 4,410	P=0,0418
	Time	850.3	1	850.3	F (1, 42) = 17,48	P=0,0001		Test details	Predicted (LS) mean 1	Predicted (LS) mean 2	Predicted (LS) mean diff,	SE of diff,	N1	N2	t	DF
	Treatment	1494	1	1494	F (1, 42) = 30,71	P<0,0001
	Residual	2043	42	48.65				control - CN03
								0 min	32.17	48.75	-16.59	2.941	15	9	5.639	42
	Difference between column means							60 min	27.65	35.12	-7.469	3.193	7	15	2.339	42
	Predicted (LS) mean of control	29.91
	Predicted (LS) mean of CN03	41.94
	Difference between predicted means	-12.03
	SE of difference	2.17
	95% CI of difference	-16,41 to -7,647
	Difference between row means
	Predicted (LS) mean of 0 min	40.46
	Predicted (LS) mean of 60 min	31.39
	Difference between predicted means	9.074
	SE of difference	2.17
	95% CI of difference	4,693 to 13,45
	Interaction CI
	Mean diff, A1 - B1	-16.59
	Mean diff, A2 - B2	-7.469
	(A1 -B1) - (A2 - B2)	-9.116
	95% CI of difference	-17,88 to -0,3559
	(B1 - A1) - (B2 - A2)	9.116
	95% CI of difference	0,3559 to 17,88
	Data summary
	Number of columns (Treatment)	2
	Number of rows (Time)	2
	Number of values	46

## Sheet: Figure 6I
		mDC											Mdc + CN03
	Distance from VLP centre of mass	cell 1	cell 2	cell 3	cell 4	cell 5	cell 6	cell 7	average	SD		Distance from VLP centre of mass	cell 1	cell 2	cell 3	cell 4	cell 5	cell 6	cell 7	cell 8	cell 9	cell 10	cell 11	cell 12	cell 13	average	SD
	0.25	0	0	0	0	0	0	0	0	0		0.25	0	0	0	0*	0	0	0	0	0	0	0	0	0	0	0
	0.5	0	0	0	0	0	0	0	0	0		0.5	0	0	0	0,246339*	0	0	0	0	0	0	0	0	0	0	0
	0.75	0	0	0.000853	0	0	0		0.000142167	0.000348236		0.75	0	0	0	0,247859*	0	0	0	0	0	0	0	0	0	0	0
	1		0	0.000853	0	0	0	0.061104	0.0103262	0.0248783		1	0	0	0	0,334528*	0	0	1.7e-05	0	0	0	0	2.69e-05	0	3.65833e-06	8.80087e-06
	1.25	0.004147	0.000717	0.115923	0.000991	0	0	0.109929	0.033101	0.0545764		1.25	0.004891	0	0	0,474161*	0	0	3.6e-05	0.134733	0	0	0	9.9e-05	0	0.0116466	0.0387875
	1.5	0.095498	0.001305	0.115923	0.129582	0	0	0.185439	0.0753924	0.0752227		1.5	0.027806	0	0.003875	0,535543*	0	0	3.6e-05	0.194416	0	0	0	9.9e-05	0	0.0188527	0.0558575
	1.75	0.220247	0.040655	0.311804	0.204337	0.000102	0	0.285834	0.151854	0.135043		1.75	0.059913	0	0.01082	0,635875*	0	0.049905	0.000481	0.304136	0.00765	0	0	9.9e-05	0.051101	0.0403421	0.0862534
	2	0.497836	0.158306	0.388862	0.336873	0.019046	1.21e-05	0.312596	0.24479	0.189834		2	0.059913	0	0.01082	0,699327*	0	0.140989	0.001632	0.43655	0.062072	0	0.000168	9.9e-05	0.061888	0.0645109	0.125011
	2.25	0.539002	0.27939	0.530363	0.486788	0.077728	1.21e-05	0.348706	0.323141	0.21738		2.25	0.109153	0	0.01082	0,708861*	3.78e-05	0.211235	0.003473	0.505152	0.109339	0	0.000168	9.9e-05	0.129364	0.0899034	0.148795
	2.5	0.667828	0.382877	0.718069	0.616818	0.210557	1.21e-05	0.478036	0.439171	0.261862		2.5	0.185036	0.016233	0.01082	0,737044*	0.001152	0.34807	0.011826	0.601143	0.138453	0.006249	0.015807	0.000222	0.222676	0.129807	0.186871
	2.75	0.836699	0.575375	0.809248	0.801394	0.303582	0.02607	0.530731	0.554728	0.302404		2.75	0.224541	0.087175	0.036746	0,773282*	0.001223	0.518485	0.066237	0.665885	0.173738	0.027935	0.114545	0.000222	0.367092	0.190319	0.217459
	3	0.919758	0.803912	0.924031	0.872468	0.348944	0.191201	0.665129	0.675063	0.293827		3	0.287557	0.109781	0.124913	0,786169*	0.001223	0.656202	0.095336	0.732454	0.250302	0.04901	0.198311	0.05671	0.498933	0.255061	0.245391
	3.25	0.937421	0.881774	0.930579	0.925978	0.389071	0.287322	0.763897	0.730863	0.276296		3.25	0.301557	0.153067	0.258507	0,823768*	0.001223	0.778235	0.184861	0.804769	0.378545	0.109509	0.2519	0.108921	0.59423	0.32711	0.264295
	3.5	0.940139	0.918003	0.935327	0.931388	0.43412	0.379052	0.785355	0.760483	0.248156		3.5	0.373875	0.177791	0.339571	0,868773*	0.002478	0.852697	0.274207	0.846282	0.508585	0.186393	0.331069	0.205478	0.729903	0.402361	0.276412
	3.75	0.940139	0.92754	0.937524	0.940517	0.475226	0.443033	0.79705	0.780147	0.225358		3.75	0.478242	0.246807	0.339571	0,927467*	0.00292	0.900152	0.389329	0.913737	0.670555	0.194343	0.428472	0.273619	0.793762	0.469292	0.291519
	4	0.940139	0.944602	0.949632	0.943123	0.544396	0.5133	0.803749	0.805563	0.196108		4	0.544878	0.37153	0.393406	0,942987*	0.00292	0.918297	0.462463	0.929916	0.744675	0.215173	0.543159	0.393095	0.857313	0.531402	0.287355
	4.25	0.947356	0.959429	0.961768	0.950419	0.591406	0.574289	0.809512	0.82774	0.175636		4.25	0.654374	0.490242	0.457242	0,951694*	0.003239	0.939326	0.490301	0.929916	0.792054	0.307121	0.625568	0.515972	0.857313	0.588556	0.273453
	4.5	0.947356	0.968829	0.965521	0.95537	0.667838	0.623131	0.811611	0.848522	0.149531		4.5	0.698121	0.537011	0.57184	0,966161*	0.008133	0.952989	0.541526	0.932738	0.867048	0.404586	0.690881	0.674904	0.910021	0.64915	0.268654
	4.75	0.949702	0.968829	0.987111	0.960285	0.721878	0.650283	0.814615	0.864672	0.136058		4.75	0.735329	0.563414	0.667733	0,974312*	0.098459	0.954135	0.588025	0.939506	0.951479	0.450964	0.753039	0.840649	0.917709	0.705037	0.254457
	5	0.959608	0.971257	0.987903	0.960285	0.8229	0.68276	0.815308	0.885717	0.114655		5	0.773992	0.592027	0.747885	0,97643*	0.32404	0.963991	0.626502	0.941712	0.969322	0.518848	0.809307	0.899179	0.931408	0.758184	0.205423
	5.25	0.970073	0.971788	0.988356	0.961794	0.919684	0.709638	0.817494	0.905547	0.104008		5.25	0.805532	0.644934	0.826298	0,980162*	0.444685	0.977121	0.670238	0.941748	0.973002	0.555505	0.83647	0.962579	0.943955	0.798506	0.180274
	5.5	0.970073	0.971866	0.989028	0.961794	0.926568	0.752744	0.819737	0.913116	0.0907814		5.5	0.869142	0.698509	0.867658	0,981911*	0.553809	0.980418	0.695983	0.941748	0.974004	0.575729	0.866827	0.971243	0.950579	0.828804	0.156906
	5.75	0.970073	0.977257	0.989028	0.964207	0.971112	0.804481	0.825518	0.928811	0.0783638		5.75	0.913232	0.739961	0.89409	0,981911*	0.617516	0.980684	0.730816	0.946278	0.975413	0.605031	0.882837	0.975056	0.955597	0.851376	0.140206
	6	0.970073	0.977257	0.989066	0.964207	0.983794	0.822216	0.850634	0.93675	0.0695093		6	0.945462	0.791008	0.928116	0,982107*	0.653767	0.986396	0.775142	0.95753	0.975842	0.655486	0.883968	0.982321	0.969429	0.875372	0.124989
	6.25	0.970073	0.977257	0.989066	0.964401	0.985539	0.84023	0.863438	0.941429	0.0621432		6.25	0.951427	0.835887	0.959846	0,986112*	0.68897	0.987854	0.824845	0.95753	0.975842	0.700185	0.88739	0.985896	0.96978	0.893788	0.108363
	6.5	0.979321	0.980284	0.990285	0.964401	0.990068	0.852547	0.873706	0.94723	0.0584191		6.5	0.959711	0.890737	0.977777	0,987391*	0.736161	0.987854	0.850262	0.95753	0.983158	0.738981	0.900988	0.986027	0.969826	0.911584	0.0922225
	6.75	0.985074	0.980581	0.991525	0.97395	0.994758	0.874013	0.877259	0.95388	0.0538926		6.75	0.959711	0.962231	0.997498	0,98749*	0.806723	0.988832	0.879813	0.981463	0.987033	0.752472	0.902379	0.986524	0.976545	0.931769	0.08043
	7	0.985074	0.981453	0.996531	0.97395	0.996198	0.887307	0.881486	0.957428	0.0505483		7	0.96655	0.991583	0.997498	0,98749*	0.859618	0.990554	0.924015	0.983326	0.987033	0.786775	0.909535	0.987883	0.982809	0.947265	0.0660107
	7.25	0.985074	0.981466	0.996531	0.975555	0.996386	0.909354	0.88755	0.961702	0.0443164		7.25	0.972332	0.99174	0.997707	0,987561*	0.890849	0.991682	0.956701	0.989214	0.987033	0.834371	0.918117	0.987911	0.982809	0.958372	0.0511383
	7.5	0.985074	0.981466	0.997475	0.975555	0.996653	0.920868	0.88755	0.96352	0.042373		7.5	0.974066	0.992544	0.997707	0,987561*	0.922657	0.993452	0.964873	0.989214	0.987033	0.845537	0.938084	0.989745	0.98302	0.964828	0.0442281
	7.75	0.985074	0.98197	0.997551	0.975555	0.996653	0.931096	0.887833	0.965105	0.0407594		7.75	0.975578	0.992544	0.997707	0,98765*	0.947656	0.994759	0.973652	0.989333	0.989045	0.892932	0.950709	0.992713	0.983141	0.973314	0.0302076
	8	0.986768	0.982506	0.997551	0.975555	0.996939	0.94935	0.896984	0.969379	0.0358428		8	0.978332	0.992544	0.997707	0,991124*	0.974313	0.994759	0.988693	0.989333	0.989045	0.932661	0.973053	0.994129	0.98382	0.982366	0.0175929
	8.25	0.986768	0.982506	0.997551	0.975555	1	0.97238	0.908705	0.974781	0.0309037		8.25	0.979124	0.992544	0.997707	0,991297*	0.983821	0.99524	0.992939	0.991601	0.989395	0.952331	0.975894	0.995588	0.983905	0.985841	0.0125773
	8.5	0.987646	0.982506	0.997576	0.976187	1	0.985227	0.91588	0.97786	0.0285623		8.5	0.979653	0.992544	0.997707	0,991354*	0.991875	0.996285	0.995175	0.991659	0.989395	0.981534	0.978923	0.995937	0.98408	0.989564	0.00679727
	8.75	0.98857	0.982554	0.997576	0.976187	1	0.985227	0.92728	0.979628	0.0245261		8.75	0.979653	0.992544	0.997707	0,991354*	0.994052	0.998009	0.99625	0.991787	0.99198	0.997879	0.979684	0.996229	0.984903	0.991723	0.0067239
	9	0.98857	0.984202	0.997576	0.985506	1	0.996707	0.934062	0.983803	0.022798		9	0.993765	0.992544	0.997707	0,991428*	0.994052	0.998009	0.99785	0.991787	0.994658	0.99867	0.982206	0.998528	0.987335	0.993926	0.00502639
	9.25	0.98857	0.984202	0.997576	0.985539	1	0.998164	0.936623	0.984382	0.0220143		9.25	0.993765	1	0.998483	0,992097*	0.994072	0.999233	0.99785	0.991847	0.994833	0.999963	0.982206	0.998528	0.989145	0.994994	0.00531356
	9.5	0.98857	0.984632	0.997576	0.985539	1	0.998164	0.940692	0.985025	0.0205459		9.5	0.994001	1	0.998483	0,993005*	0.995053	0.999403	0.99785	0.992881	0.994999	0.999963	0.987301	0.999582	0.990275	0.995816	0.00414914
	9.75	0.98857	0.985235	0.997817	0.985539	1	0.998827	0.947968	0.986279	0.0180438		9.75	0.994001	1	1	0,993421*	0.997904	0.999568	0.99785	0.993932	0.99531	0.999963	0.987413	0.999727	0.99061	0.996356	0.00417118
	10	0.98857	0.985258	0.997817	0.985823	1	0.998827	0.959416	0.987959	0.0140666		10	0.994001	1	1	0,993719*	1	0.999802	0.99785	0.994025	0.99531	0.999963	0.995211		0.992452	0.997147	0.00297828
	10.25	0.989669	0.985286	0.997817	0.985823	1	0.998827	0.964528	0.98885	0.0123718		10.25	0.999897	1	1	0,994999*	1	0.999902	0.99785	0.995135	0.995636	0.999963	0.99998	0.999904	0.994241	0.998542	0.00223678
	10.5	0.990357	0.986104	0.997867	0.985823	1	0.998827	0.964528	0.989072	0.0123515		10.5	0.999897	1	1	0,999124*	1	0.999961	0.998995	0.99658	0.996275	1	0.99998		0.995437	0.99883	0.0017985
	10.75	0.990357	0.986104	0.997967	0.986977	1	0.998827	0.968194	0.989775	0.0111129		10.75	0.999897	1	1	0,999698*	1	1	0.998995	0.997483	0.996999	1	0.99998	0.999971	0.996073	0.999117	0.00142757
	11	0.990357	0.986166	0.998136	0.987204	1	0.998948	0.96861	0.989917	0.011003		11	0.999986	1	1	0,999963*	1	1	1	0.997882	0.996999	1	0.99998	0.999971	0.996073	0.999241	0.00141422
	11.25	0.990357	0.986202	0.998189	0.989793	1	1	0.969658	0.9906	0.0107466		11.25	0.999986	1	1	0,999963*	1	1	1	0.998481	0.997869	1	0.99998	0.999971	0.996604	0.999408	0.00113503
	11.5	0.990357	0.986202	0.998579	0.989793	1	1	0.969658	0.990656	0.0107934		11.5	0.999986	1	1	1*	1	1	1	0.998709	0.998589	1	0.99998	0.999971	0.997139	0.999531	0.000914862
	11.75	0.990357	0.986808	0.99939	0.989793	1	1	0.969658	0.990858	0.0108565		11.75	0.999986	1	1	1*	1	1	1	0.999295	0.998935	1	0.99998	0.999971	0.997358	0.999627	0.00079453
	12	0.990357	0.995492	0.999642	0.989793	1	1	0.969658	0.992135	0.0108413		12	0.999986	1	1	1*	1	1	1	0.999957	0.999385	1	0.99998	0.999971	0.997358	0.99972	0.000763913
	12.25	0.990357	0.996238	0.999862	0.990361	1	1	0.999831	0.996664	0.00451299		12.25	0.999986	1	1	1*	1	1	1	0.999957	0.999778	1	0.99998	0.999971	0.998095	0.999814	0.0005449
	12.5	0.990357	0.996238	0.999862	0.991142	1	1	0.999831	0.996776	0.00433743		12.5	0.999986	1	1	1*	1	1	1	0.999989	0.999882	1	0.99998	0.999971	1	0.999984	3.35884e-05
	12.75	0.990357	0.996273	0.999969	0.991142	1	1	0.999831	0.996796	0.00434957		12.75	0.999986	1	1	1*	1	1	1	0.999989	0.999882	1	0.99998	0.999971	1	0.999984	3.35884e-05
	13	0.990357	0.996273	0.999969	0.991142	1	1	0.999831	0.996796	0.00434957		13	0.999986	1	1	1*	1	1	1	0.999989	0.999882	1	0.99998	0.999971	1	0.999984	3.35884e-05
	13.25	0.990408	0.996719	1	0.991142	1	1	0.999831	0.996871	0.00433491		13.25	0.999986	1	1	1*	1	1	1	0.999989	0.999934	1	0.99998	0.999971	1	0.999988	1.97269e-05
	13.5	0.990408	0.999596	1	0.991142	1	1	0.999831	0.997282	0.00445283		13.5	0.999986	1	1	1*	1	1	1	0.999989	0.999934	1	0.99998	0.999971	1	0.999988	1.97269e-05
	13.75	0.990477	0.999596	1	0.991913	1	1	0.999831	0.997402	0.00426316		13.75	0.999986	1	1	1*	1	1	1	0.999989	0.999934	1	0.99998	0.999971	1	0.999988	1.97269e-05
	14	0.990477	0.999596	1	0.991913	1	1	0.999937	0.997418	0.0042734		14	0.999986	1	1	1*	1	1	1	0.999989	0.999934	1	0.99998	0.999971	1	0.999988	1.97269e-05
	14.25	0.990603	0.999988	1	0.992295	1	1	0.999937	0.997546	0.00419374		14.25	0.999986	1	1	1*	1	1	1	0.999989	0.999934	1	0.99998	0.999971	1	0.999988	1.97269e-05
	14.5	0.990603	1	1	0.992411	1	1	0.999937	0.997564	0.00417086		14.5	0.999986	1	1	1*	1	1	1	0.999989	0.999934	1	0.99998	0.999971	1	0.999988	1.97269e-05
	14.75	0.997167	1	1	0.992411	1	1	1	0.998511	0.00288969		14.75	0.999986	1	1	1*	1	1	1	0.999989	0.999934	1	0.99998	0.999971	1	0.999988	1.97269e-05
	15	0.997167	1	1	0.992989	1	1	1	0.998594	0.00268752		15	0.999986	1	1	1*	1	1	1	0.999989	1	1	0.99998	0.999971	1	0.999994	1.00076e-05
	15.25	0.999875	1	1	0.992989	1	1	1	0.998981	0.00264245		15.25	0.999986	1	1	1*	1	1	1	0.999989	1	1	0.99998	0.999971	1	0.999994	1.00076e-05
	15.5	0.999875	1	1	0.992989	1	1	1	0.998981	0.00264245		15.5	0.999986	1	1	1*	1	1	1	0.999989	1	1	0.99998	0.999971	1	0.999994	1.00076e-05
	15.75	0.999875	1	1	0.992989	1	1	1	0.998981	0.00264245		15.75	0.999986	1	1	1*	1	1	1	0.999989	1	1	0.99998	0.999971	1	0.999994	1.00076e-05
	16	0.999875	1	1	0.992989	1	1	1	0.998981	0.00264245		16	0.999986	1	1	1*	1	1	1	0.999989	1	1	0.99998	0.999971	1	0.999994	1.00076e-05
	16.25	0.99997	1	1	0.994112	1	1	1	0.999155	0.00222359		16.25	0.999986	1	1	1*	1	1	1	0.999989	1	1	0.99998	0.999971	1	0.999994	1.00076e-05
	16.5	0.99997	1	1	0.994112	1	1	1	0.999155	0.00222359		16.5	0.999986	1	1	1*	1	1	1	0.999989	1	1	0.99998	0.999971	1	0.999994	1.00076e-05
	16.75	0.99997	1	1	0.995284	1	1	1	0.999322	0.00178063		16.75	0.999986	1	1	1*	1	1	1	0.999989	1	1	0.99998	0.999971	1	0.999994	1.00076e-05
	Distance from cell centre at which we have 50% of total VLP Intensity
	Cell Number	Control	Control + CN03
	1	2.119	3.778
	2	2.597	4.537
	3	2.13	4.216
	4	2.236	5.588
	5	3.673	2.729
	6	4.032	4.359
	7	1.164	2.09
	8		3.469
	9		5.08
	10		3.908
	11		4.159
	12		3.025
	AVERAGE	2.56443	3.9115
	SD	0.986573	0.983372
	Table Analyzed Mann-Whitney test
	Column B	CN03
	vs.	vs,
	Column A	Control
	Mann Whitney test
	P value	0.0171
	Exact or approximate P value?	Exact
	P value summary	*
	Significantly different (P < 0.05)?	Yes
	One- or two-tailed P value?	Two-tailed
	Sum of ranks in column A,B	42 , 148
	Mann-Whitney U	14
	Difference between medians
	Median of column A	2,236, n=7
	Median of column B	4,034, n=12
	Difference: Actual	1.798
	Difference: Hodges-Lehmann	1.549

## Sheet: Figure 6J
	Cell area um2 mDC (60min VLP)											Cell area um2 mDC + CN03 (60min VLP)
	Distance from cell base	cell 1	cell 2	cell 3	cell 4	cell 5	cell 6	cell 7	average	SD		Distance from cell base	cell 1	cell 2	cell 3	cell 4	cell 5	cell 6	cell 7	cell 8	cell 9	cell 10	cell 11	cell 12	cell 13	cell 14	average	SD
	2		135.512	85.334	61.423	83.883	138.706	82.285	97.8572	28.8922		2	76.5655	141.674	143.454	137.836	123.779	208.438	145.968	204.111	115.712	125.038	180.964	123.647	125.826	135.172	142.013	35.151
	4	74.682	152.387	55.337	58.176	95.8005	117.068	48.002	85.9218	35.365		4	90.655	113.971	125.682	65.629	117.346	205.281	95.629	162.23	105.259	89.858	151.64	136.722	119.335	116.259	121.107	35.0243
	6	39.07	155.986	48.429	141.345	116.326	134.382	62.966	99.7863	44.7784		6	105.944	99.271	126.944	85.6655	123.062	187.177	93.329	138.385	123.87	102.123	139.361	153.185	111.612	117.062	121.928	26.694
	8	49.83	140.567	69.264	111.398	115.982	146.538	95.89	104.21	32.8447		8	105.701	76.099	110.647	111.079	111.224	158.315	81.0405	88.362	128.736	114.192	117.418	143.652	96.6705	112.138	111.091	22.4187
	10	81.577	135.815	99.09	84.58	85.025	126.768	107.387	102.892	19.9911		10	81.6975	42.589	68.535	120.734	80.174	89.6765	40.102		130.533	111.393	86.9215	110.795	74.608	107.843	88.1232	27.9292
	12	86.037	123.806	106.923	66.1775	38.2535	77.47	19.189	73.9794	33.9427		12	49.112			94.976	61.796		41.921		114.988	93.16		58.765	53.996	98.834	74.172	26.2994
	14	85.017	90.239	81.5685			44.468	11.445	62.5475	30.2385		14	27.725			38.687					77.606	64.464				69.9015	55.6767	21.3916
	Table Analyzed (Two way ANOVA)
	Two-way ANOVA	Ordinary
	Alpha	0.05
	Source of Variation	% of total variation	P value	P value summary	Significant?
	Interaction	6.52	0.0706	ns	No
	Distance from cell base	20.36	<0,0001	****	Yes
	Treatment	2.327	0.0405	*	Yes
	ANOVA table	SS (Type III)	DF	MS	F (DFn, DFd)	P value
	Interaction	12063	6	2011	F (6, 115) = 2,005	P=0,0706
	Distance from cell base	37670	6	6278	F (6, 115) = 6,261	P<0,0001
	Treatment	4305	1	4305	F (1, 115) = 4,294	P=0,0405
	Residual	115316	115	1003
	Difference between column means
	Predicted (LS) mean of 30 min Ctr	89.6
	Predicted (LS) mean of 30 in Rho act	102
	Difference between predicted means	-12.42
	SE of difference	5.992
	95% CI of difference	-24,29 to -0,5470
	Data summary
	Number of columns (Treatment)	2
	Number of rows (Distance from cell base)	7
	Number of values	129
	Multiple comparison Bonferroni
	Number of families	1
	Number of comparisons per family	7
	Alpha	0.05
	Bonferroni's multiple comparisons test	Predicted (LS) mean diff,	95,00% CI of diff,	Below threshold?	Summary	Adjusted P Value
	60 min Ctr - 60 in Rho act
	2	-44.16	-86,48 to -1,833	Yes	*	0.0355
	4	-35.19	-75,34 to 4,966	No	ns	0.1259
	6	-22.14	-62,29 to 18,01	No	ns	0.9356
	8	-6.881	-47,03 to 33,27	No	ns	>0,9999
	10	14.77	-25,89 to 55,43	No	ns	>0,9999
	12	-0.1926	-43,90 to 43,52	No	ns	>0,9999
	14	6.871	-47,99 to 61,73	No	ns	>0,9999
	Test details	Predicted (LS) mean 1	Predicted (LS) mean 2	Predicted (LS) mean diff,	SE of diff,	N1	N2	t	DF
	60 min Ctr - 60 in Rho act
	2	97.86	142	-44.16	15.45	6	14	2.858	115
	4	85.92	121.1	-35.19	14.66	7	14	2.4	115
	6	99.79	121.9	-22.14	14.66	7	14	1.51	115
	8	104.2	111.1	-6.881	14.66	7	14	0.4694	115
	10	102.9	88.12	14.77	14.85	7	13	0.9948	115
	12	73.98	74.17	-0.1926	15.96	7	9	0.01207	115
	14	62.55	55.68	6.871	20.03	5	5	0.3431	115
