# Supplementary material for: Actin-regulated Siglec-1 nanoclustering influences HIV-1 capture and virus-containing compartment formation in dendritic cells
Source: eLife journal article supplement (doi:10.7554/elife.78836), 2023-03-20
Supplement: fig6-figsupp1-data1 [file elife-78836-fig6-figsupp1-data1-v2.zip]

## Sheet: Figure S1A
	Mander siglec-1 coloc VLP (5 minutes pulse)
	Distance from cell base	Experiment 1	Experiment 2	Experiment 3	average	SEM
	2	0.14346	0.051099	0.139926	0.111495	0.0302152
	4	0.129234	0.092815	0.1614	0.127816	0.0198115
	6	0.122876	0.033914	0.19798	0.118257	0.0474181
	8	0.109858	0.004165	0.091556	0.0685263	0.0326115
	10	0.116367	0	0.10573	0.0740323	0.0371433
	12	0.06932	0	0.000348	0.0232227	0.0230489
	Number of cells analysed	9 cells	13 cells	15 cells
	Mander siglec-1 coloc VLP (30 minutes pulse)
	Distance from cell base	Experiment 1	Experiment 2	Experiment 3	average	SEM
	2	0.246556	0.246053	0.177021	0.22321	0.0230951
	4	0.195034	0.154165	0.0967767	0.148659	0.0284978
	6	0.175232	0.1209	0.0137708	0.103301	0.0474332
	8	0.113816	0.156644	0.00957606	0.0933453	0.0436712
	10	0.107465	0.0994449	0.0060861	0.0709987	0.0325388
	12	0.05292	0.0600654	0.00412811	0.0390378	0.0175763
	Number of cells analysed	15 cells	13 cells	13 cells
	Mander siglec-1 coloc VLP (60 minutes pulse)
	Distance from cell base	Experiment 1	Experiment 2	average	SEM
	2	0.145702	0.115761	0.130732	0.0122235
	4	0.215297	0.167229	0.191263	0.0196239
	6	0.0987279	0.085545	0.0921365	0.00538191
	8	0	0.043982	0.021991	0.0179556
	10	0	0	0	0
	12	0	0	0	0
	Number of cells analysed	11 cells	11 cells
	Table Analyzed (Two way ANOVA)							Bonferroni multiple comparison test
	Two-way ANOVA	Ordinary						Number of families	6
	Alpha	0.05						Number of comparisons per family	3
								Alpha	0.05
	Source of Variation	% of total variation	P value	P value summary	Significant?
	Interaction	12.06	0.4171	ns	No			Bonferroni's multiple comparisons test	Predicted (LS) mean diff,	95,00% CI of diff,	Below threshold?	Summary	Adjusted P Value
	Distance from cell base	50.93	<0,0001	****	Yes
	Time	5.239	0.1162	ns	No			2
								60 min vs. 30 min	-0.09248	-0,2143 to 0,02931	No	ns	0.1911
	ANOVA table	SS (Type III)	DF	MS	F (DFn, DFd)	P value		60 min vs. 5 min	0.01924	-0,1026 to 0,1410	No	ns	>0,9999
	Interaction	0.02951	10	0.002951	F (10, 30) = 1,066	P=0,4171		30 min vs. 5 min	0.1117	0,002780 to 0,2206	Yes	*	0.0429
	Distance from cell base	0.1246	5	0.02492	F (5, 30) = 9,000	P<0,0001
	Time	0.01281	2	0.006407	F (2, 30) = 2,314	P=0,1162		4
	Residual	0.08305	30	0.002768				60 min vs. 30 min	0.0426	-0,07919 to 0,1644	No	ns	>0,9999
								60 min vs. 5 min	0.06345	-0,05835 to 0,1852	No	ns	0.5895
	Data summary							30 min vs. 5 min	0.02084	-0,08809 to 0,1298	No	ns	>0,9999
	Number of columns (Time)	3
	Number of rows (Distance from cell base)	6						6
	Number of values	48						60 min vs. 30 min	-0.01116	-0,1330 to 0,1106	No	ns	>0,9999
								60 min vs. 5 min	-0.02612	-0,1479 to 0,09567	No	ns	>0,9999
								30 min vs. 5 min	-0.01496	-0,1239 to 0,09398	No	ns	>0,9999
								8
								60 min vs. 30 min	-0.07135	-0,1931 to 0,05044	No	ns	0.4435
								60 min vs. 5 min	-0.04654	-0,1683 to 0,07526	No	ns	>0,9999
								30 min vs. 5 min	0.02482	-0,08412 to 0,1338	No	ns	>0,9999
								10
								60 min vs. 30 min	-0.071	-0,1928 to 0,05079	No	ns	0.4493
								60 min vs. 5 min	-0.07403	-0,1958 to 0,04776	No	ns	0.4011
								30 min vs. 5 min	-0.003034	-0,1120 to 0,1059	No	ns	>0,9999
								12
								60 min vs. 30 min	-0.03904	-0,1608 to 0,08275	No	ns	>0,9999
								60 min vs. 5 min	-0.02322	-0,1450 to 0,09857	No	ns	>0,9999
								30 min vs. 5 min	0.01582	-0,09312 to 0,1247	No	ns	>0,9999
								Test details	Predicted (LS) mean 1	Predicted (LS) mean 2	Predicted (LS) mean diff,	SE of diff,	N1	N2	t	DF
								2
								60 min vs. 30 min	0.1307	0.2232	-0.09248	0.04803	2	3	1.925	30
								60 min vs. 5 min	0.1307	0.1115	0.01924	0.04803	2	3	0.4005	30
								30 min vs. 5 min	0.2232	0.1115	0.1117	0.04296	3	3	2.6	30
								4
								60 min vs. 30 min	0.1913	0.1487	0.0426	0.04803	2	3	0.887	30
								60 min vs. 5 min	0.1913	0.1278	0.06345	0.04803	2	3	1.321	30
								30 min vs. 5 min	0.1487	0.1278	0.02084	0.04296	3	3	0.4852	30
								6
								60 min vs. 30 min	0.09214	0.1033	-0.01116	0.04803	2	3	0.2324	30
								60 min vs. 5 min	0.09214	0.1183	-0.02612	0.04803	2	3	0.5438	30
								30 min vs. 5 min	0.1033	0.1183	-0.01496	0.04296	3	3	0.3481	30
								8
								60 min vs. 30 min	0.02199	0.09335	-0.07135	0.04803	2	3	1.486	30
								60 min vs. 5 min	0.02199	0.06853	-0.04654	0.04803	2	3	0.9689	30
								30 min vs. 5 min	0.09335	0.06853	0.02482	0.04296	3	3	0.5777	30
								10
								60 min vs. 30 min	0	0.071	-0.071	0.04803	2	3	1.478	30
								60 min vs. 5 min	0	0.07403	-0.07403	0.04803	2	3	1.541	30
								30 min vs. 5 min	0.071	0.07403	-0.003034	0.04296	3	3	0.07062	30
								12
								60 min vs. 30 min	0	0.03904	-0.03904	0.04803	2	3	0.8128	30
								60 min vs. 5 min	0	0.02322	-0.02322	0.04803	2	3	0.4835	30
								30 min vs. 5 min	0.03904	0.02322	0.01582	0.04296	3	3	0.3681	30

## Sheet: Figure S1B
		Mander siglec-1 coloc 4% GM-1 LUV (5 minutes pulse)
	Distance from cell base	cell 1	cell 2	cell 3	cell 4	cell 5	cell 6	cell 7	cell 8	cell 9	cell 10	cell 11	cell 12	cell 13	cell 14	cell 15	average	SD
	2	0.099112	0.342557	0.115018	0.128159	0.072091	0.093882	0.132753	0.095526	0,261126*	0.226353	0.39533	0.083351	0.144727	0.133694	0.075777	0.152738	0.100003
	4	0.323949	0.402603	0.288494	0.289644	0.222681	0.240135	0.322246	0.197495	0,718412*	0.164022	0.590073	0.311017	0.310921	0.296219	0.224882	0.298884	0.103929
	6	0.144059	0.303175	0.404083	0.234949	0.248054	0.231385	0.279487	0.135178	0,642593*	0.137803	0.299803	0.194725	0.289769	0.376105	0.143439	0.24443	0.0872449
	8	0.064107	0.224437	0.212096	0.22363	0.117172	0.168992	0.242236	0.235838	0,555112*	0	0	0.07045	0.180164	0.226852	0.074112	0.14572	0.0890793
	10	0	0.275743	0.181205	0.067708	0.201269	0	0.245874	0	0,526012*	0	0	0	0.33244	0	0.053088	0.0969519	0.122837
	12	0	0	0.050378	0	0.207493	0	0.151673	0	0*	0	0	0	0	0	0	0.0292531	0.0659927
		Mander siglec-1 coloc 4% GM-1 LUV (30 minutes pulse)
	Distance from cell base	cell 1	cell 2	cell 3	cell 4	cell 5	cell 6	cell 7	average	SD
	2	0.201832	0.268981	0.28111	0.393024	0.213895	0.201563		0.260068	0.0736827
	4	0.353184	0.195284	0.340456	0.353434	0.032214	0.276536	0.295996	0.263872	0.116494
	6	0.090525	0.165345	0.268218	0.17674	0.23146	0.174661	0.549519	0.236638	0.148761
	8	0.031887	0.129412	0.067895	0.08195	0.212327	0.09026	0.275496	0.127032	0.0868493
	10	0.029213	0	0.040971	0	0.00559	0.073482	0.123064	0.0389029	0.0456684
	12	0	0.090909	0.008395	0	0	0	0.311346	0.0586643	0.116319
		Mander siglec-1 coloc 4% GM-1 LUV (60 minutes pulse)
	Distance from cell base	cell 1	cell 2	cell 3	cell 4	cell 5	cell 6	cell 7	cell 8	cell 9	cell 10	cell 11	cell 12	cell 13	average	SD
	2	0.352334	0.351443	0.221135	0.380407	0.24625	0.372611	0.138775	0.382895	0.369795	0.190139	0.476069	0.308304	0.357241	0.319031	0.0938417
	4	0.381675	0.157955	0.328952	0.264045	0.179528	0.029145	0.433632	0.388105	0.361269	0.030221	0.351113	0.233816	0.412281	0.273211	0.138227
	6	0.520408	0.032948	0.052554	0.050852	0.257098	0.370968	0.263654	0.228818	0.169596	0.13895	0.147155	0.122956	0	0.181227	0.147401
	8	0	0.042459	0.04374	0.061453	0.12382	0.11347	0.218726	0.107064	0.170732	0	0.164165	0.117093	0.142857	0.100429	0.0671462
	10	0.217469	0	0.03105	0.180505	0.132368	0.065714	0.071212	0.167696	0.1475	0.023356	0.077348	0.046233	0.2049	0.105027	0.0735294
	12	0.10177	0	0	0.126966	0.003576	0.017036	0.198795	0.278552	0.129697	0.008521	0.07473	0	0.041009	0.0754348	0.088542
	Table Analyzed (Two way ANOVA)							Bonferroni multiple comparison test
	Two-way ANOVA	Ordinary						Number of families	6
	Alpha	0.05						Number of comparisons per family	3
								Alpha	0.05
	Source of Variation	% of total variation	P value	P value summary	Significant?
	Interaction	7.43	0.0058	**	Yes			Bonferroni's multiple comparisons test	Predicted (LS) mean diff,	95,00% CI of diff,	Below threshold?	Summary	Adjusted P Value
	Distance from the cell base	36.65	<0,0001	****	Yes
	Time	0.2471	0.6504	ns	No			2
								LUV 4% 5min vs. LUV 4% 30min	-0.1073	-0,2272 to 0,01259	No	ns	0.0956
	ANOVA table	SS (Type III)	DF	MS	F (DFn, DFd)	P value		LUV 4% 5min vs. Group C	-0.1663	-0,2610 to -0,07163	Yes	***	0.0001
	Interaction	0.2683	10	0.02683	F (10, 185) = 2,593	P=0,0058		LUV 4% 30min vs. Group C	-0.05896	-0,1803 to 0,06233	No	ns	0.7252
	Distance from the cell base	1.324	5	0.2647	F (5, 185) = 25,58	P<0,0001
	Time	0.008922	2	0.004461	F (2, 185) = 0,4311	P=0,6504		4
	Residual	1.914	185	0.01035				LUV 4% 5min vs. LUV 4% 30min	0.03501	-0,07875 to 0,1488	No	ns	>0,9999
								LUV 4% 5min vs. Group C	0.02567	-0,06898 to 0,1203	No	ns	>0,9999
	Data summary							LUV 4% 30min vs. Group C	-0.009339	-0,1246 to 0,1059	No	ns	>0,9999
	Number of columns (Time)	3
	Number of rows (Distance from the cell base)	6						6
	Number of values	203						LUV 4% 5min vs. LUV 4% 30min	0.007791	-0,1060 to 0,1216	No	ns	>0,9999
								LUV 4% 5min vs. Group C	0.0632	-0,03146 to 0,1579	No	ns	0.3253
								LUV 4% 30min vs. Group C	0.05541	-0,05980 to 0,1706	No	ns	0.7403
								8
								LUV 4% 5min vs. LUV 4% 30min	0.01869	-0,09508 to 0,1325	No	ns	>0,9999
								LUV 4% 5min vs. Group C	0.04529	-0,04937 to 0,1399	No	ns	0.7476
								LUV 4% 30min vs. Group C	0.0266	-0,08861 to 0,1418	No	ns	>0,9999
								10
								LUV 4% 5min vs. LUV 4% 30min	0.05805	-0,05572 to 0,1718	No	ns	0.6577
								LUV 4% 5min vs. Group C	-0.008075	-0,1027 to 0,08658	No	ns	>0,9999
								LUV 4% 30min vs. Group C	-0.06612	-0,1813 to 0,04909	No	ns	0.5017
								12
								LUV 4% 5min vs. LUV 4% 30min	-0.02941	-0,1432 to 0,08435	No	ns	>0,9999
								LUV 4% 5min vs. Group C	-0.04618	-0,1408 to 0,04848	No	ns	0.7201
								LUV 4% 30min vs. Group C	-0.01677	-0,1320 to 0,09844	No	ns	>0,9999
								Test details	Predicted (LS) mean 1	Predicted (LS) mean 2	Predicted (LS) mean diff,	SE of diff,	N1	N2	t	DF
								2
								LUV 4% 5min vs. LUV 4% 30min	0.1527	0.2601	-0.1073	0.04964	14	6	2.162	185
								LUV 4% 5min vs. Group C	0.1527	0.319	-0.1663	0.03918	14	13	4.244	185
								LUV 4% 30min vs. Group C	0.2601	0.319	-0.05896	0.05021	6	13	1.174	185
								4
								LUV 4% 5min vs. LUV 4% 30min	0.2989	0.2639	0.03501	0.04709	14	7	0.7435	185
								LUV 4% 5min vs. Group C	0.2989	0.2732	0.02567	0.03918	14	13	0.6553	185
								LUV 4% 30min vs. Group C	0.2639	0.2732	-0.009339	0.04769	7	13	0.1958	185
								6
								LUV 4% 5min vs. LUV 4% 30min	0.2444	0.2366	0.007791	0.04709	14	7	0.1655	185
								LUV 4% 5min vs. Group C	0.2444	0.1812	0.0632	0.03918	14	13	1.613	185
								LUV 4% 30min vs. Group C	0.2366	0.1812	0.05541	0.04769	7	13	1.162	185
								8
								LUV 4% 5min vs. LUV 4% 30min	0.1457	0.127	0.01869	0.04709	14	7	0.3969	185
								LUV 4% 5min vs. Group C	0.1457	0.1004	0.04529	0.03918	14	13	1.156	185
								LUV 4% 30min vs. Group C	0.127	0.1004	0.0266	0.04769	7	13	0.5578	185
								10
								LUV 4% 5min vs. LUV 4% 30min	0.09695	0.0389	0.05805	0.04709	14	7	1.233	185
								LUV 4% 5min vs. Group C	0.09695	0.105	-0.008075	0.03918	14	13	0.2061	185
								LUV 4% 30min vs. Group C	0.0389	0.105	-0.06612	0.04769	7	13	1.387	185
								12
								LUV 4% 5min vs. LUV 4% 30min	0.02925	0.05866	-0.02941	0.04709	14	7	0.6246	185
								LUV 4% 5min vs. Group C	0.02925	0.07543	-0.04618	0.03918	14	13	1.179	185
								LUV 4% 30min vs. Group C	0.05866	0.07543	-0.01677	0.04769	7	13	0.3517	185

## Sheet: Figure S1D
		Time after VLP addition
	Cell nº	0 min	60 min
	cell 1	33.4069	35.2134
	cell 2	41.0141	29.243
	cell 3	35.8753	22.2923
	cell 4	43.6229	21.241
	cell 5	38.7381	23.6626
	cell 6	29.8096	21.3282
	cell 7	32.577	21.6004
	cell 8		53,30077*
	average	36.4348	24.9401
	SD	4.93627	5.33199
	Table Analyzed (Mann-Whitney test)
	Column B	60min
	vs.	vs,
	Column A	0min
	Mann Whitney test
	P value	0.0041
	Exact or approximate P value?	Exact
	P value summary	**
	Significantly different (P < 0.05)?	Yes
	One- or two-tailed P value?	Two-tailed
	Sum of ranks in column A,B	74 , 31
	Mann-Whitney U	3
	Difference between medians
	Median of column A	35,88, n=7
	Median of column B	22,29, n=7
	Difference: Actual	-13.58
	Difference: Hodges-Lehmann	-11.77

## Sheet: Figure S1E
	Ration pcofilin-cofilin (normalised to 0 min)
	Time	0 min	5 min	30 min	60 min
	Experiment 1	1	0.680698	0.543647	0.349995
	Experiment 2	1	0.891092	0.75368	0.819281
	Experiment 3	1	0.498775	0.448706	0.758934
	Experiment 4	1	0.916656	0.755032	0.587808
	average	1	0.746805	0.625266	0.629005
	SEM	0	0.0981315	0.077009	0.105131
	Ratio pair T test (0min vs 30min)			Ratio pair T test (5min vs 30min)
	Column C	30 min		Column C	30 min
	vs.	vs,		vs.	vs,
	Column A	0 min		Column B	5 min
	Ratio paired t test			Ratio paired t test
	P value	0.031		P value	0.0064
	P value summary	*		P value summary	**
	Significantly different (P < 0.05)?	Yes		Significantly different (P < 0.05)?	Yes
	One- or two-tailed P value?	Two-tailed		One- or two-tailed P value?	Two-tailed
	t, df	t=3,845, df=3		t, df	t=6,842, df=3
	Number of pairs	4		Number of pairs	4
	How big is the difference?			How big is the difference?
	Geometric mean of ratios (C / A)	0.6104		Geometric mean of ratios (C / B)	0.8411
	SD of log(ratios)	0.1115		SD of log(ratios)	0.02196
	SEM of log(ratios)	0.05576		SEM of log(ratios)	0.01098
	95% confidence interval	0,4057 to 0,9184		95% confidence interval	0,7761 to 0,9116
	R squared (partial eta squared)	0.8313		R squared (partial eta squared)	0.9398
	How effective was the pairing?			How effective was the pairing?
	Correlation coefficient (r)	Horizontal line		Correlation coefficient (r)	0.9874
	P value (one tailed)			P value (one tailed)	0.0063
	P value summary			P value summary	**
	Was the pairing significantly effective?			Was the pairing significantly effective?	Yes
