# Supplementary material for: Actin-regulated Siglec-1 nanoclustering influences HIV-1 capture and virus-containing compartment formation in dendritic cells
Source: eLife journal article supplement (doi:10.7554/elife.78836), 2023-03-20

Uncropped gel image of Figure 6-figure supplement 1E

***p-Cofilin & actin***  
(1st blot from top)

Actin

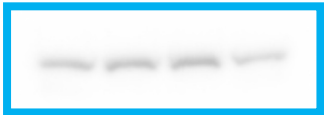

p-Cofilin

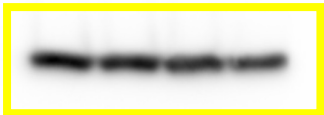

0 5 30 60

+VLP (min)

***Cofilin & actin***  
(3rd blot from top)

Actin

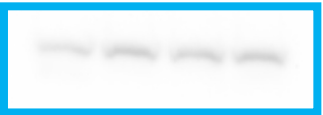

Cofilin

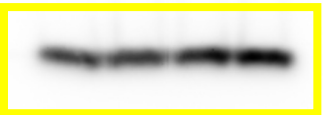

0 5 30 60

+VLP (min)

Same + picture of membranes with MW marker

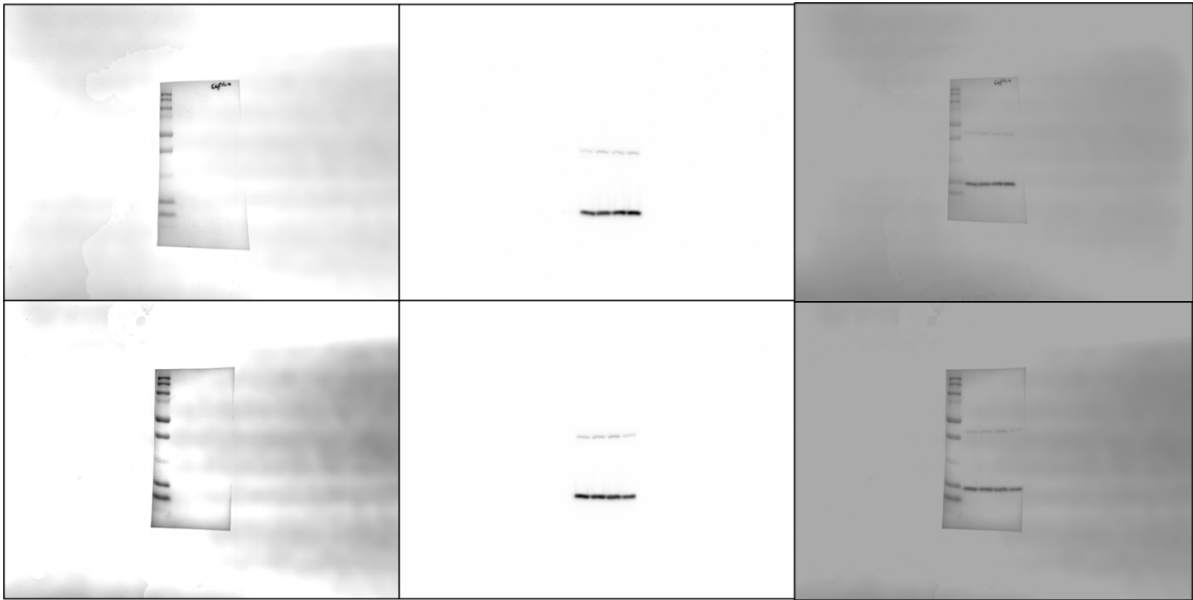

Supplement: fig6-figsupp1-data2 [file elife-78836-fig6-figsupp1-data2-v2.zip]
