# Supplementary figures and images for: Actin-regulated Siglec-1 nanoclustering influences HIV-1 capture and virus-containing compartment formation in dendritic cells
Source: eLife journal article supplement (doi:10.7554/elife.78836), 2023-03-20

Figure 1

A

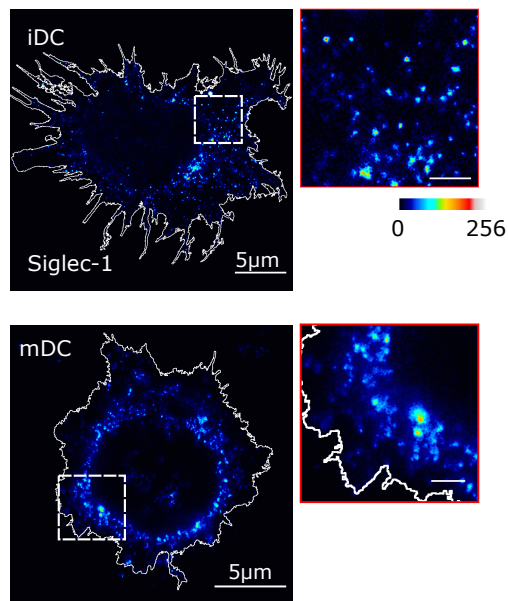

B

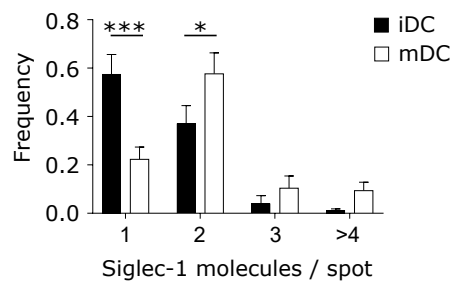

C

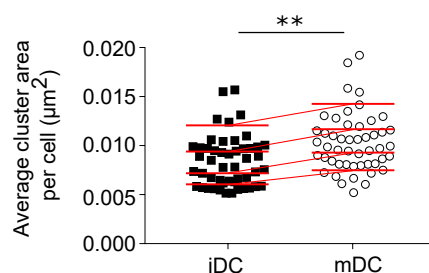

D

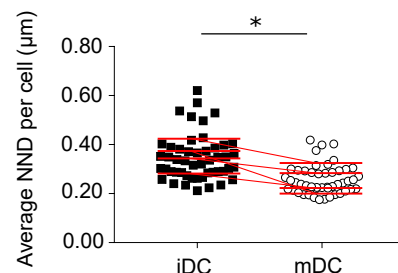

E

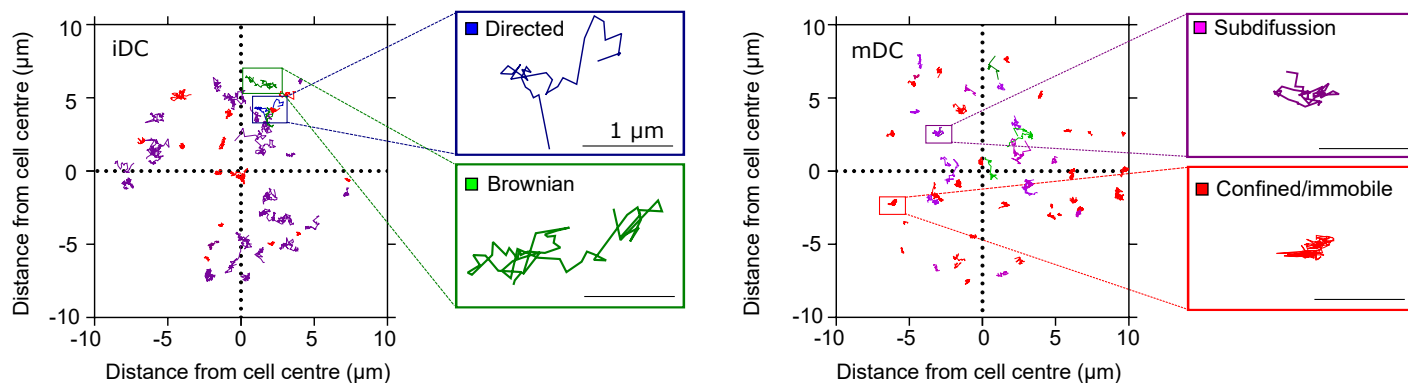

F

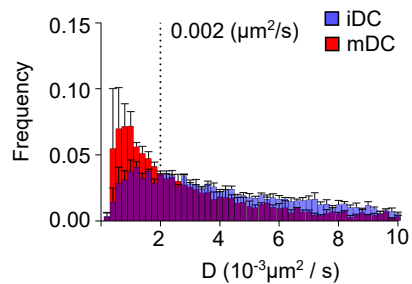

G

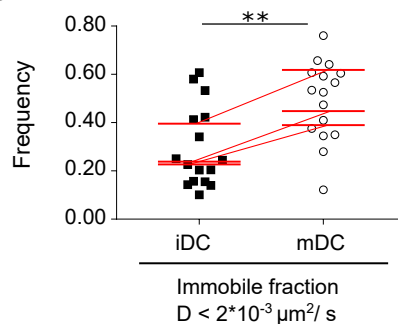

H

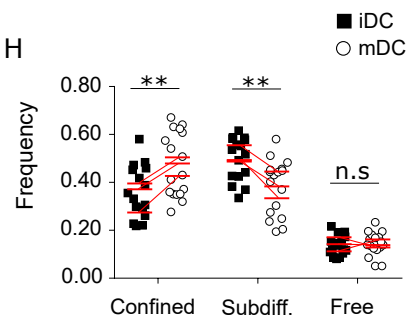

I

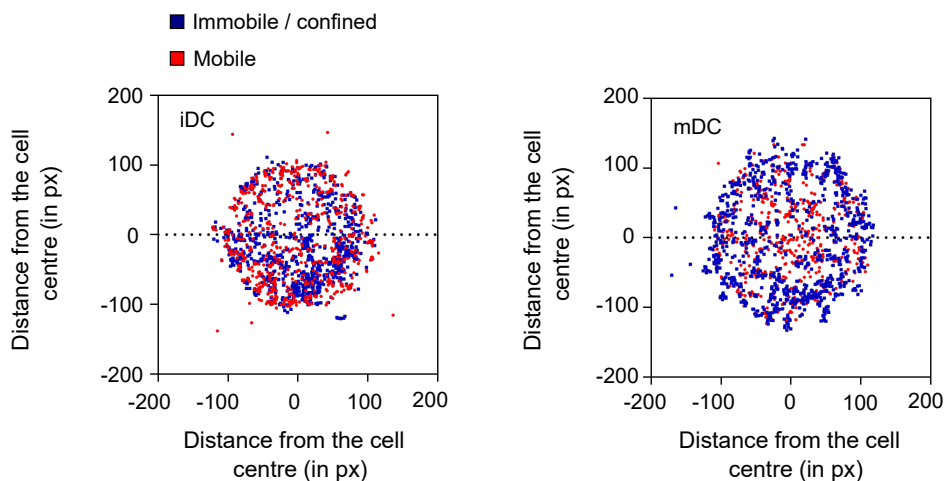

J

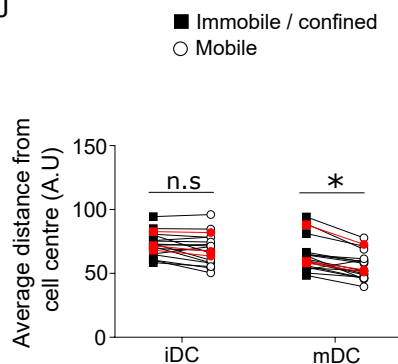

Supplement: fig1-data1 [file elife-78836-fig1-data1-v2.zip]

Uncropped gel image of Figure 1-figure supplement 1E

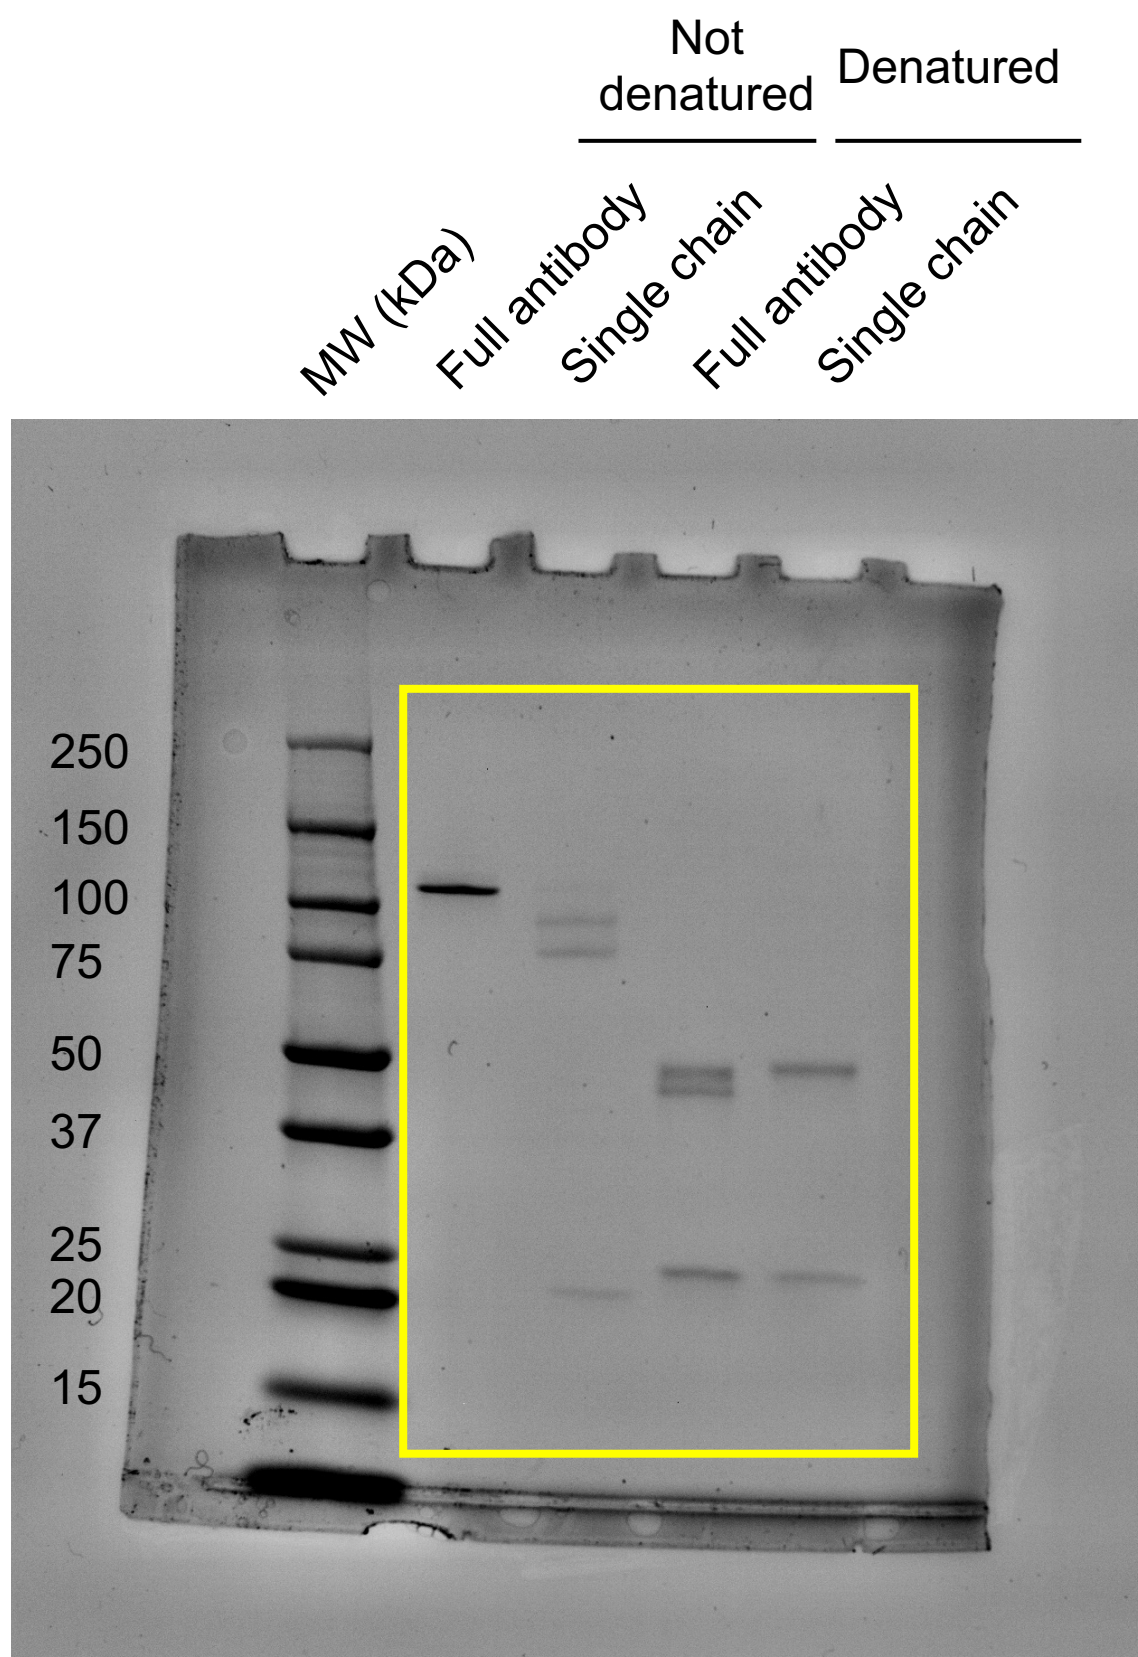

Supplement: fig1-figsupp1-data1 [file elife-78836-fig1-figsupp1-data1-v2.zip]

**Figure 1-figure supplement 1**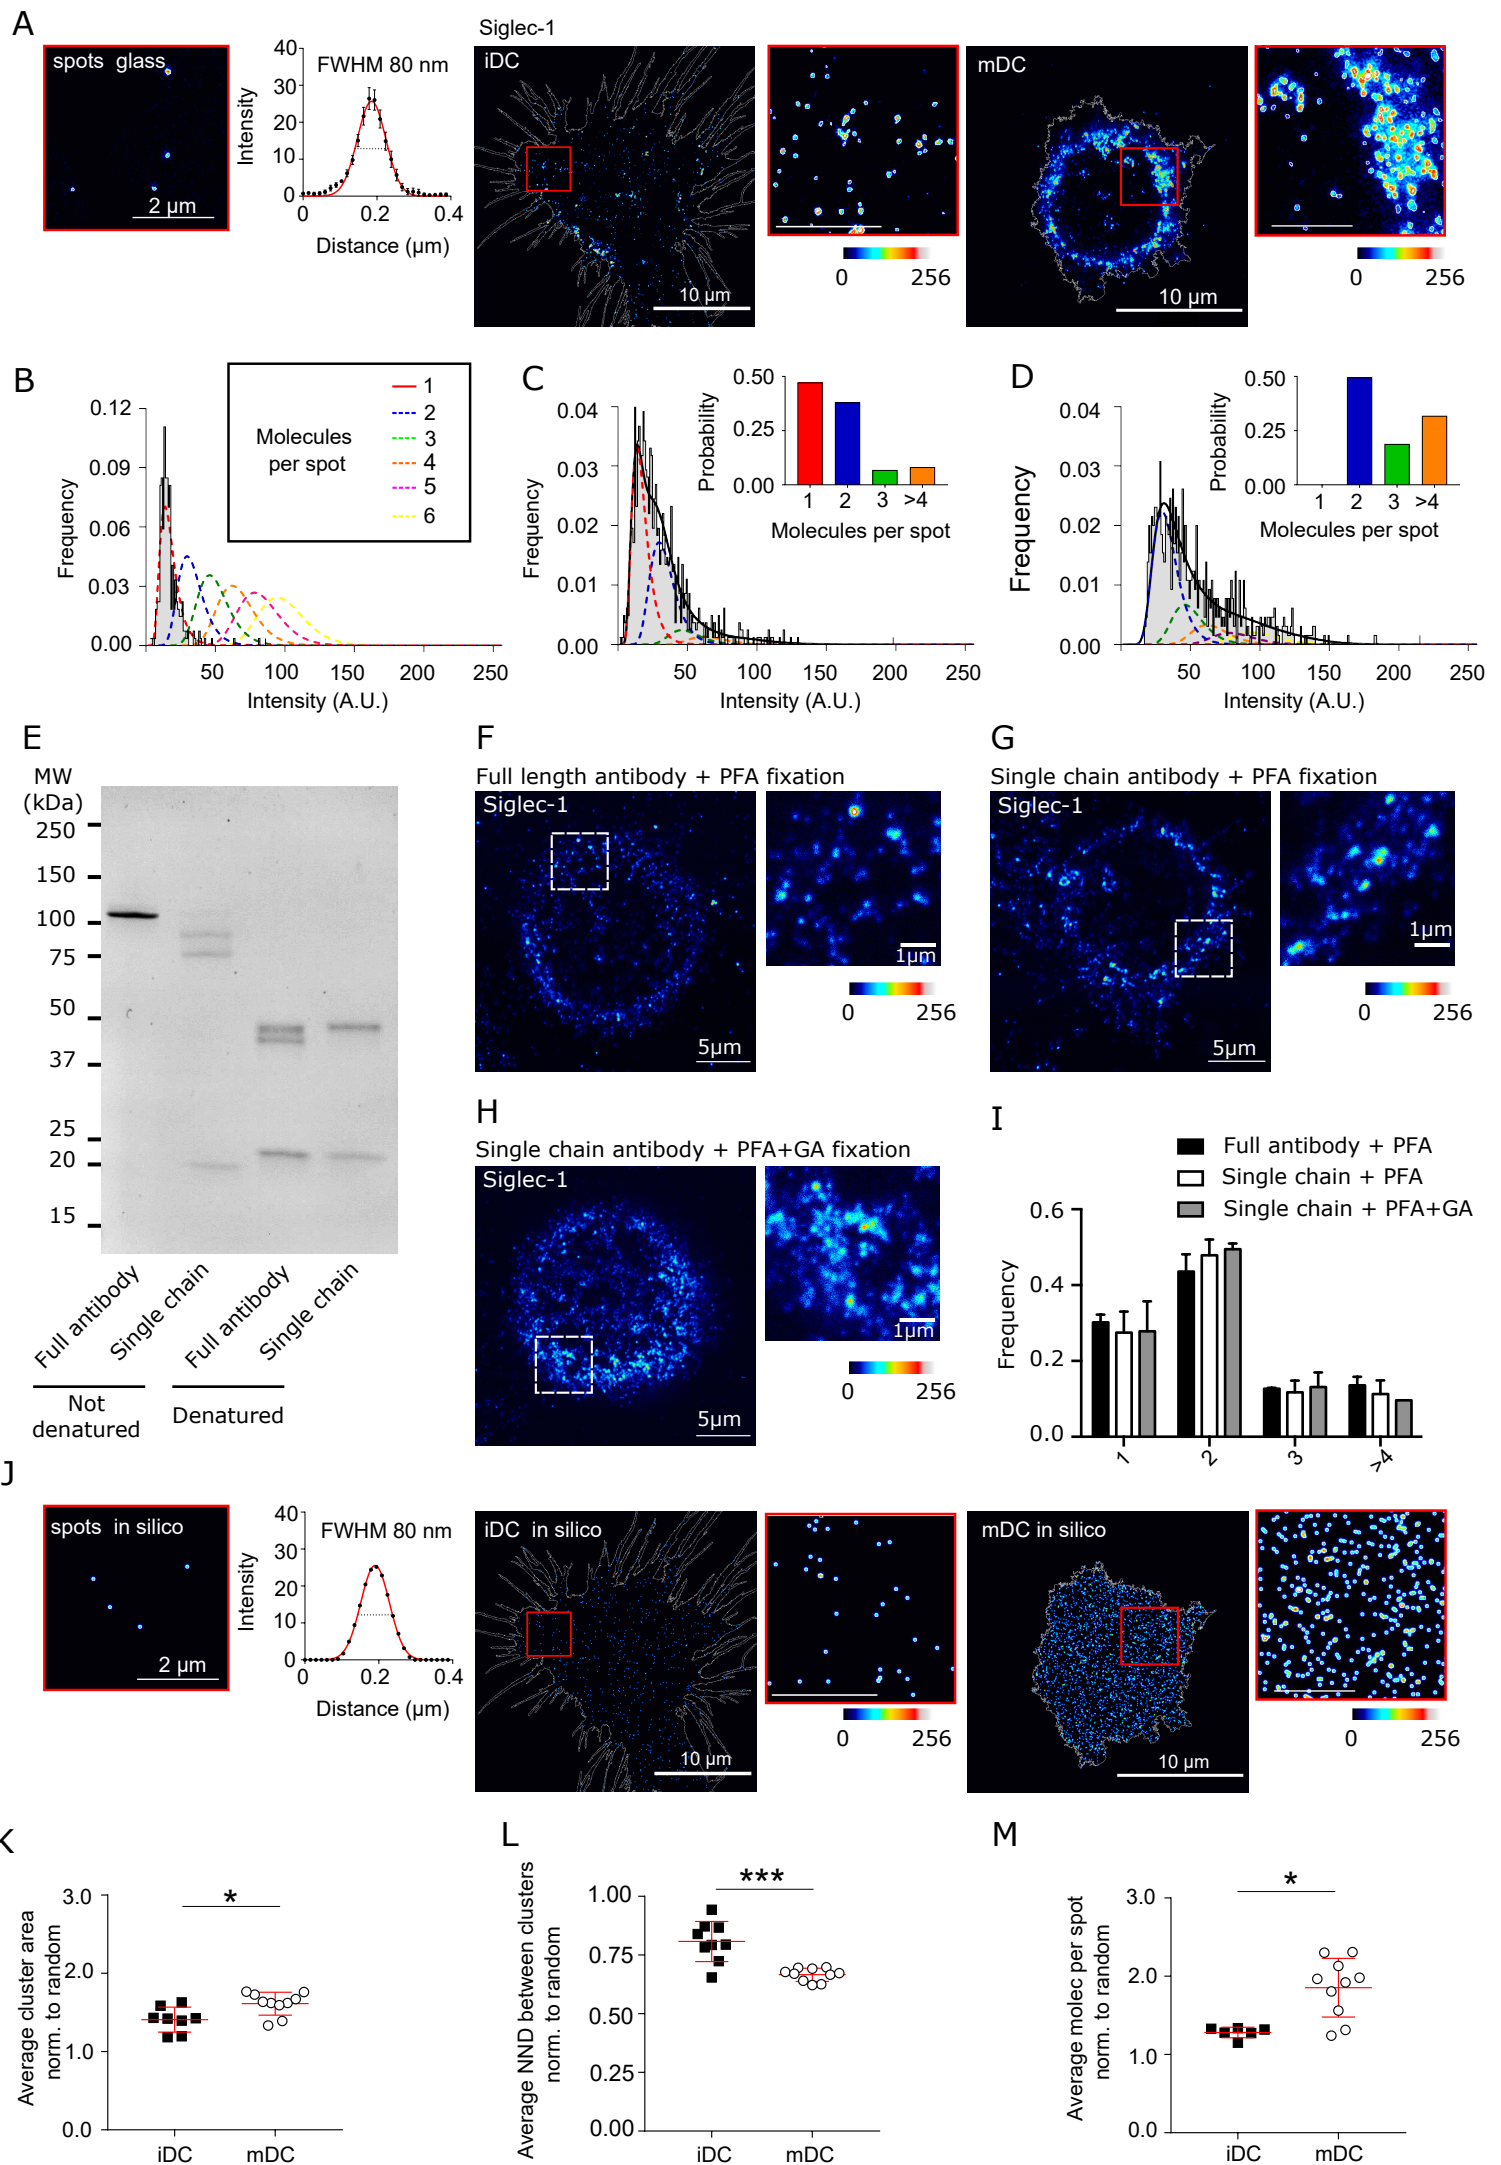

Supplement: fig1-figsupp1-data2 [file elife-78836-fig1-figsupp1-data2-v2.zip]

Figure 2

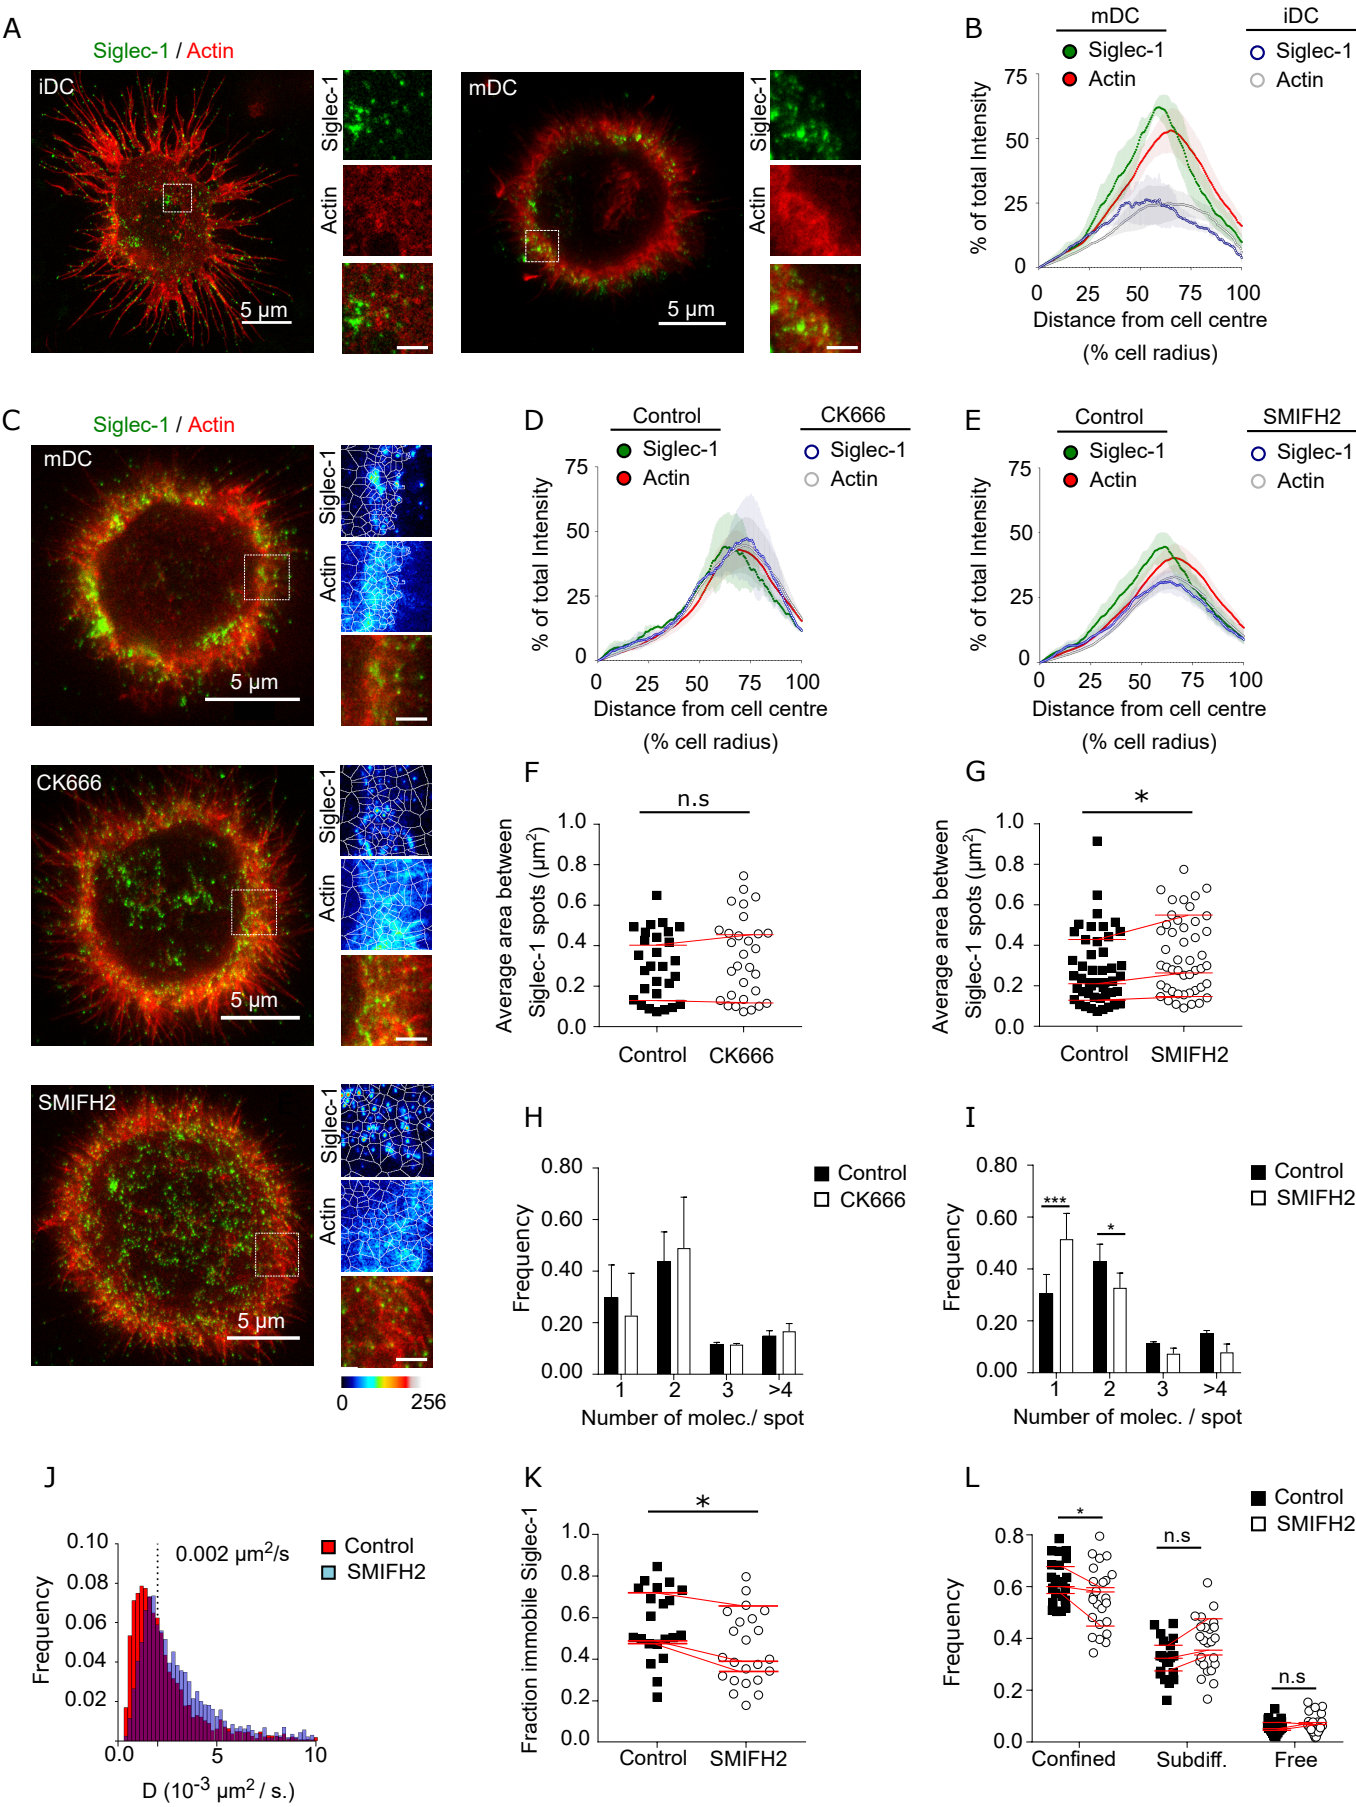

Supplement: fig2-data1 [file Figure 2.pdf › Figure 2-source data 1/Figure 2.pdf]

Figure 2-figure supplement 1

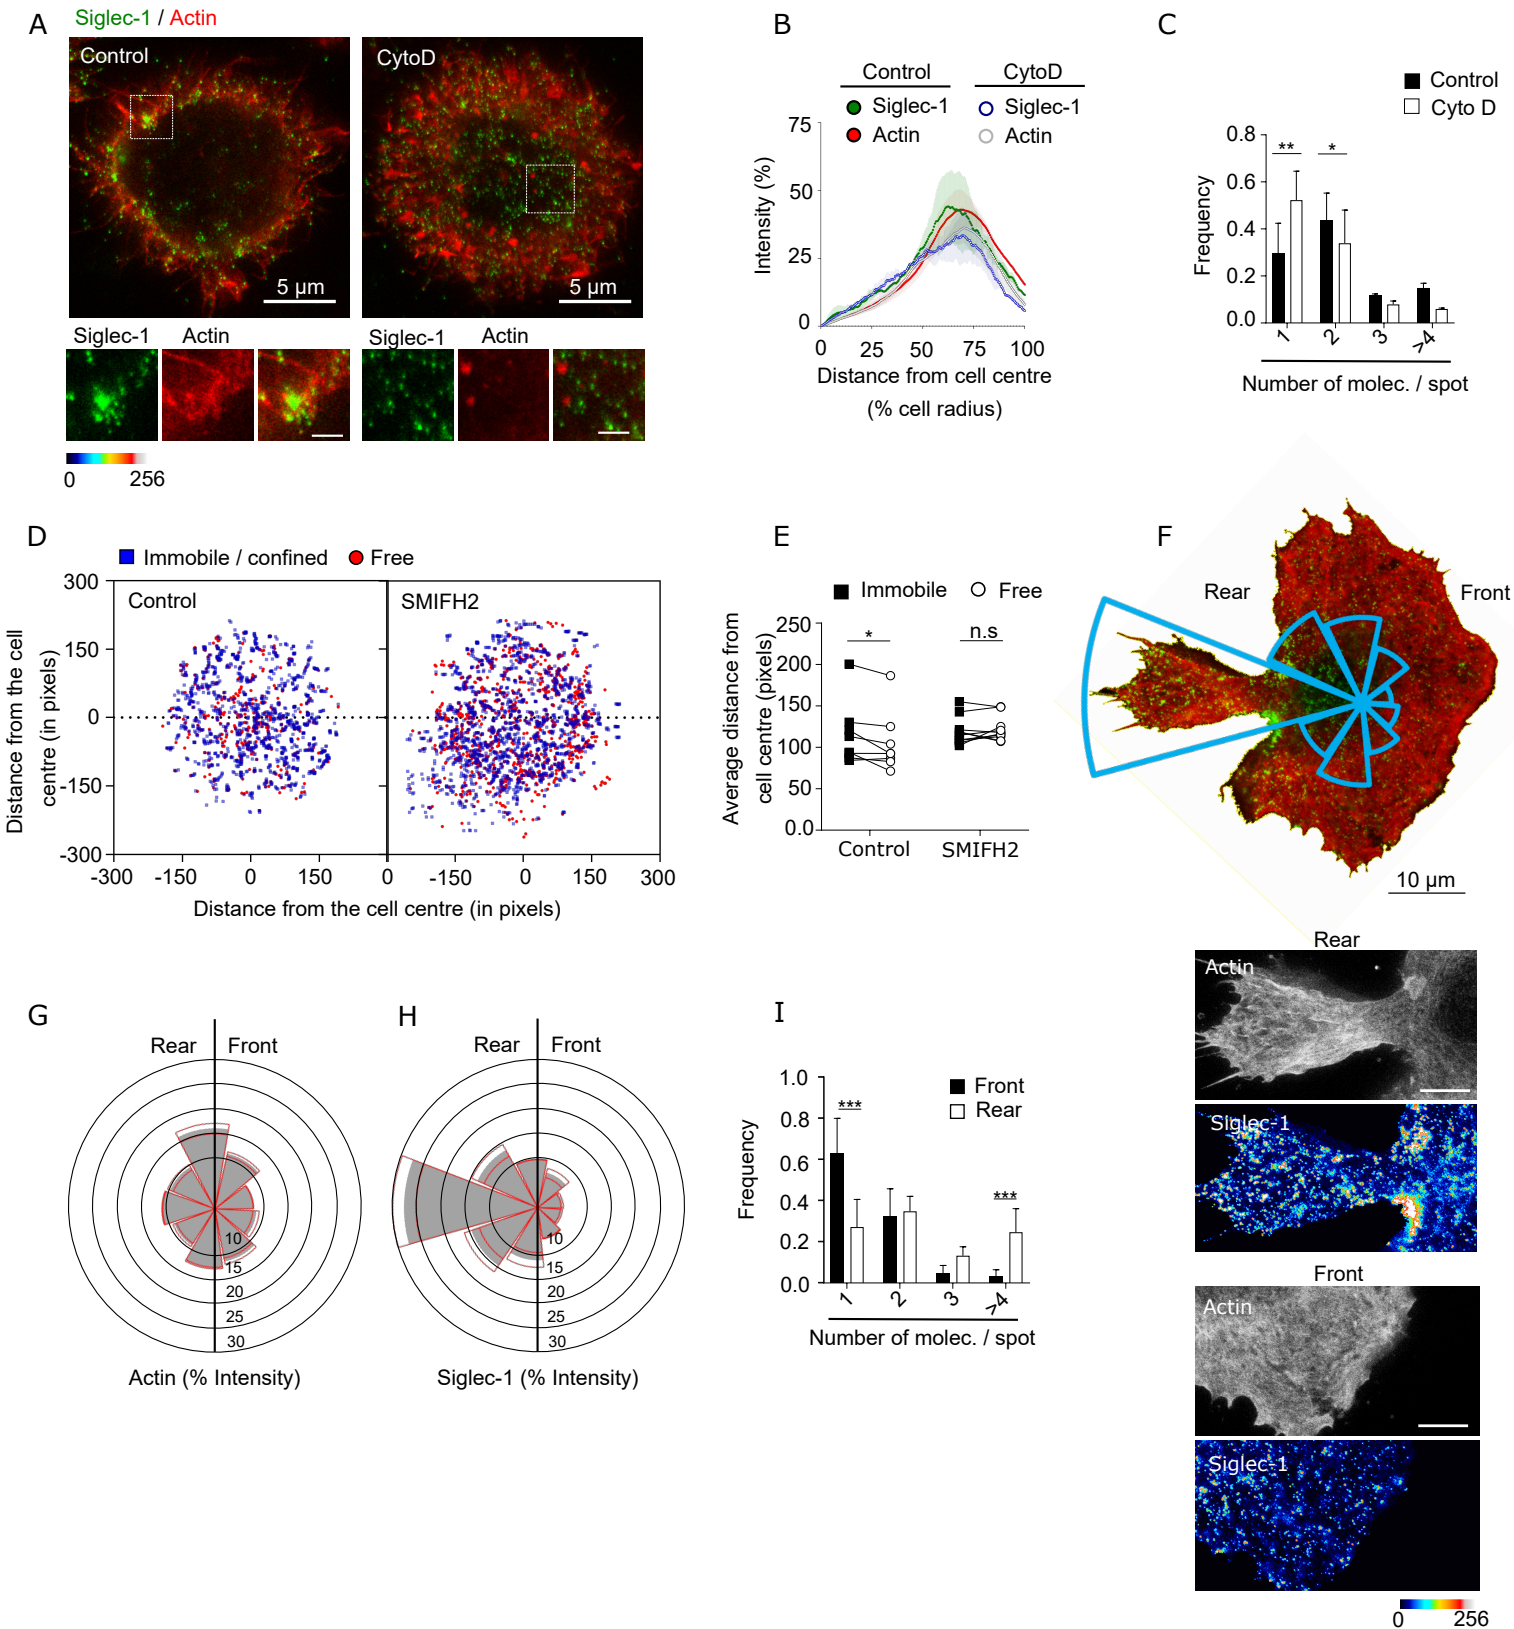

Supplement: fig2-figsupp1-data1 [file elife-78836-fig2-figsupp1-data1-v2.zip]

Figure 3

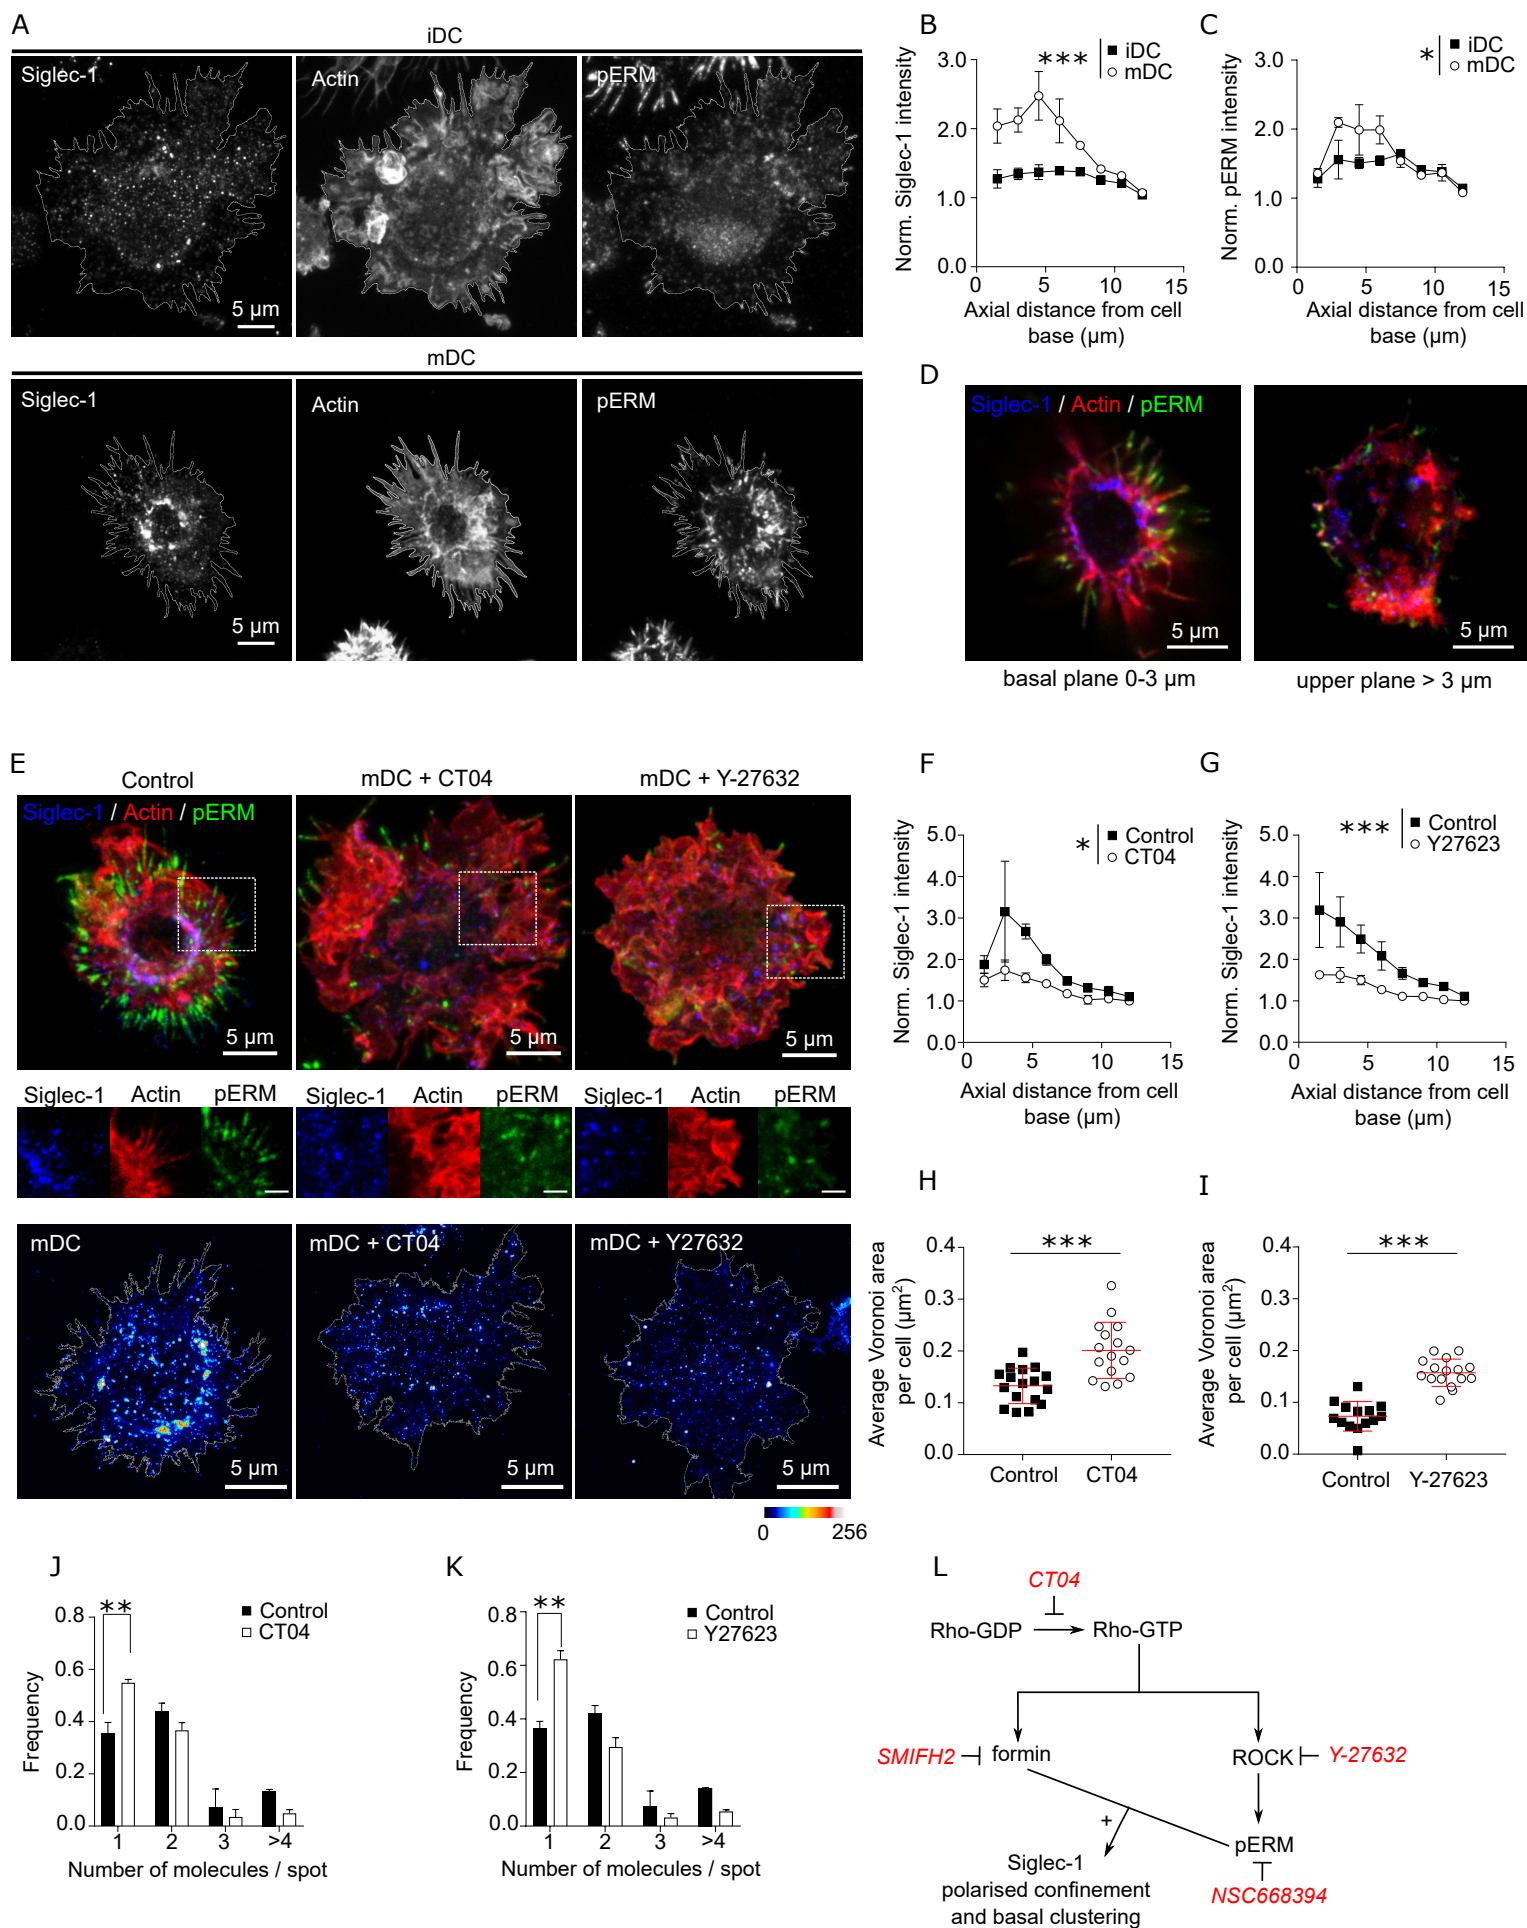

Supplement: fig3-data1 [file elife-78836-fig3-data1-v2.zip]

Figure 3-figure supplement 1

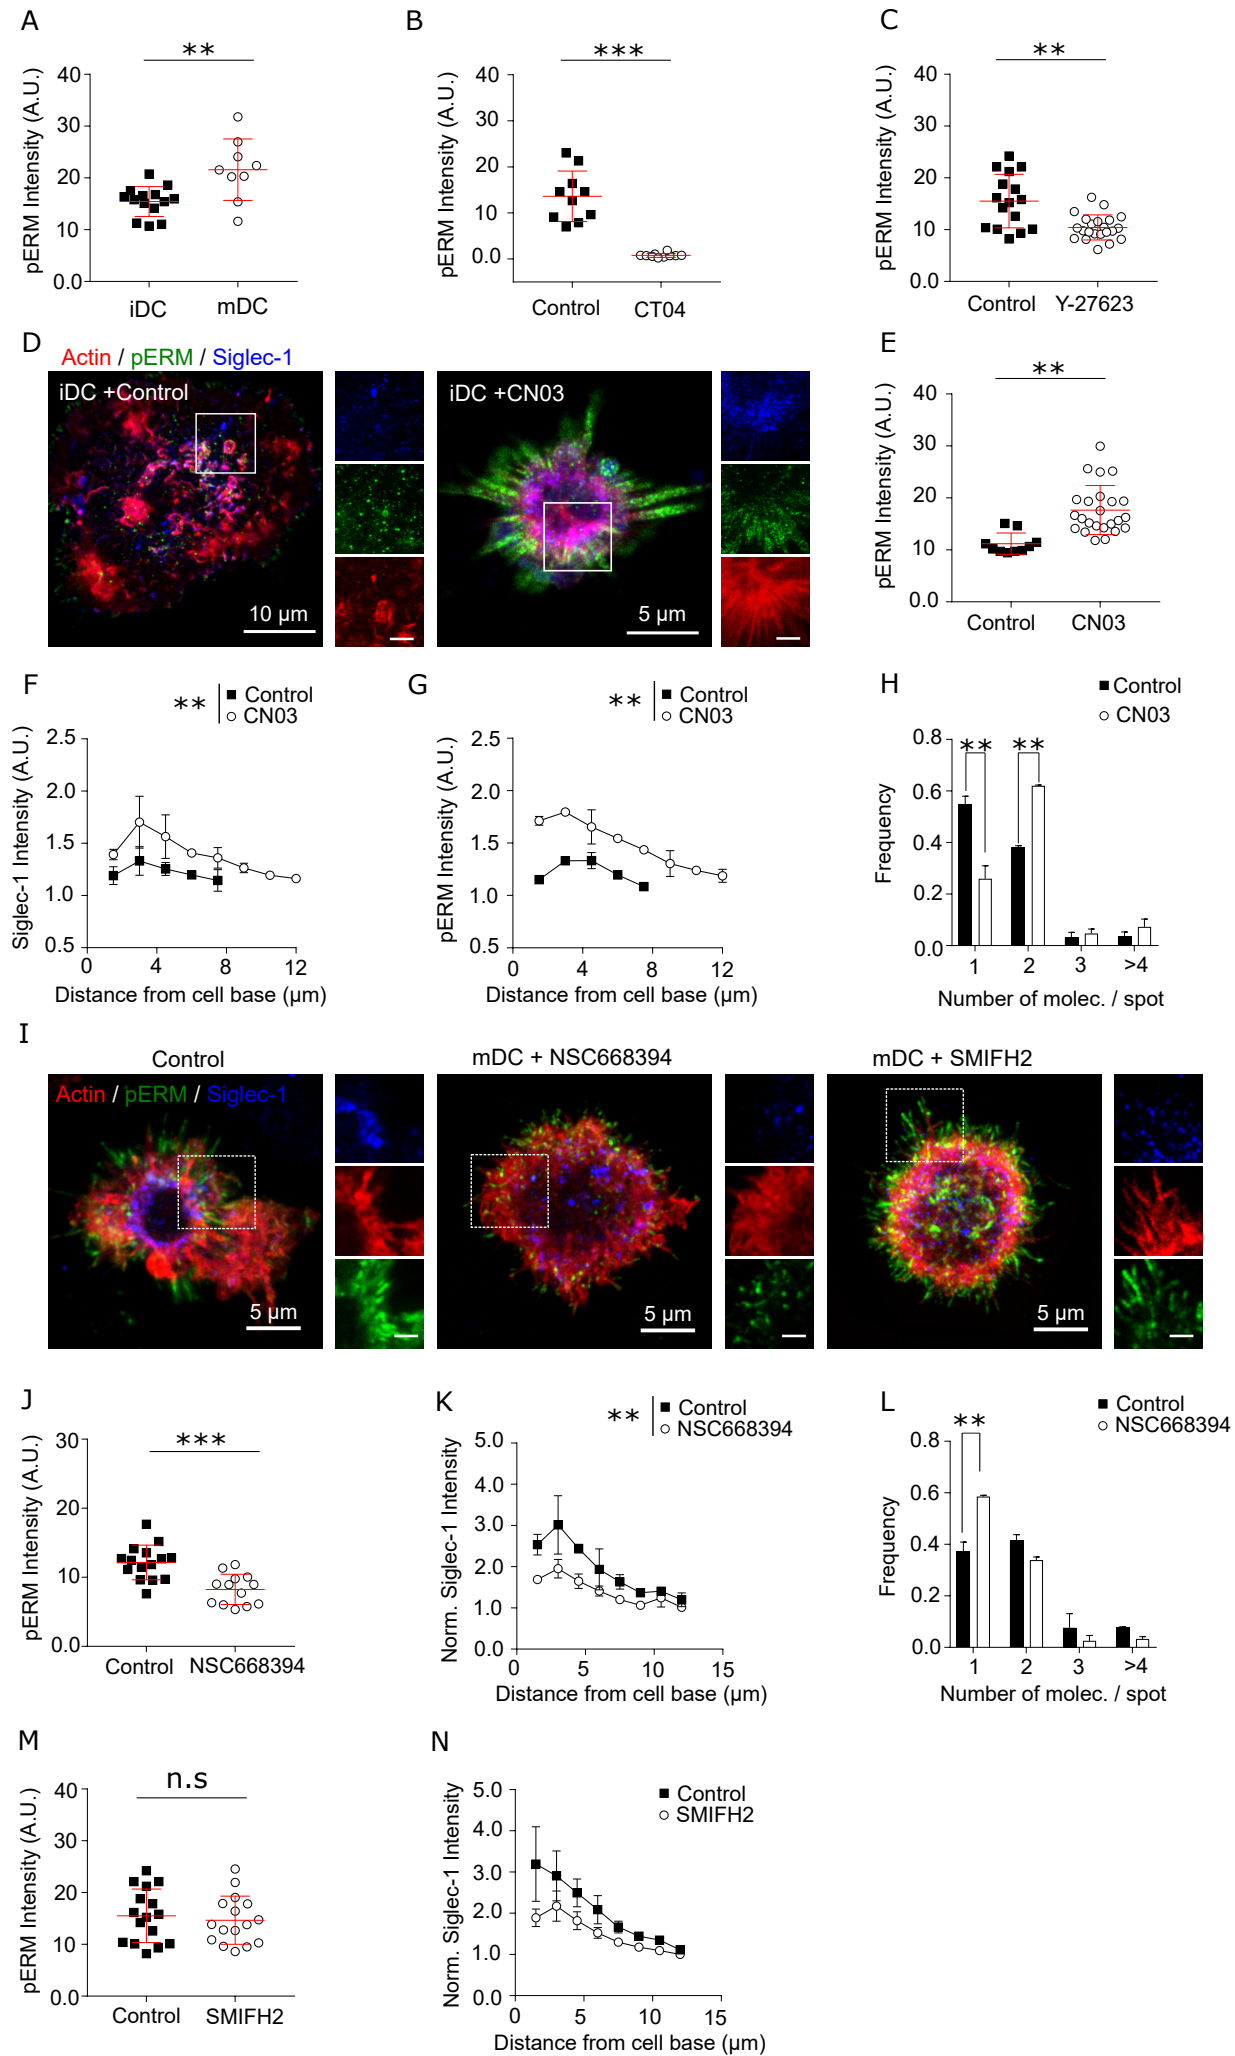

Supplement: fig3-figsupp1-data1 [file elife-78836-fig3-figsupp1-data1-v2.zip]

Figure 4

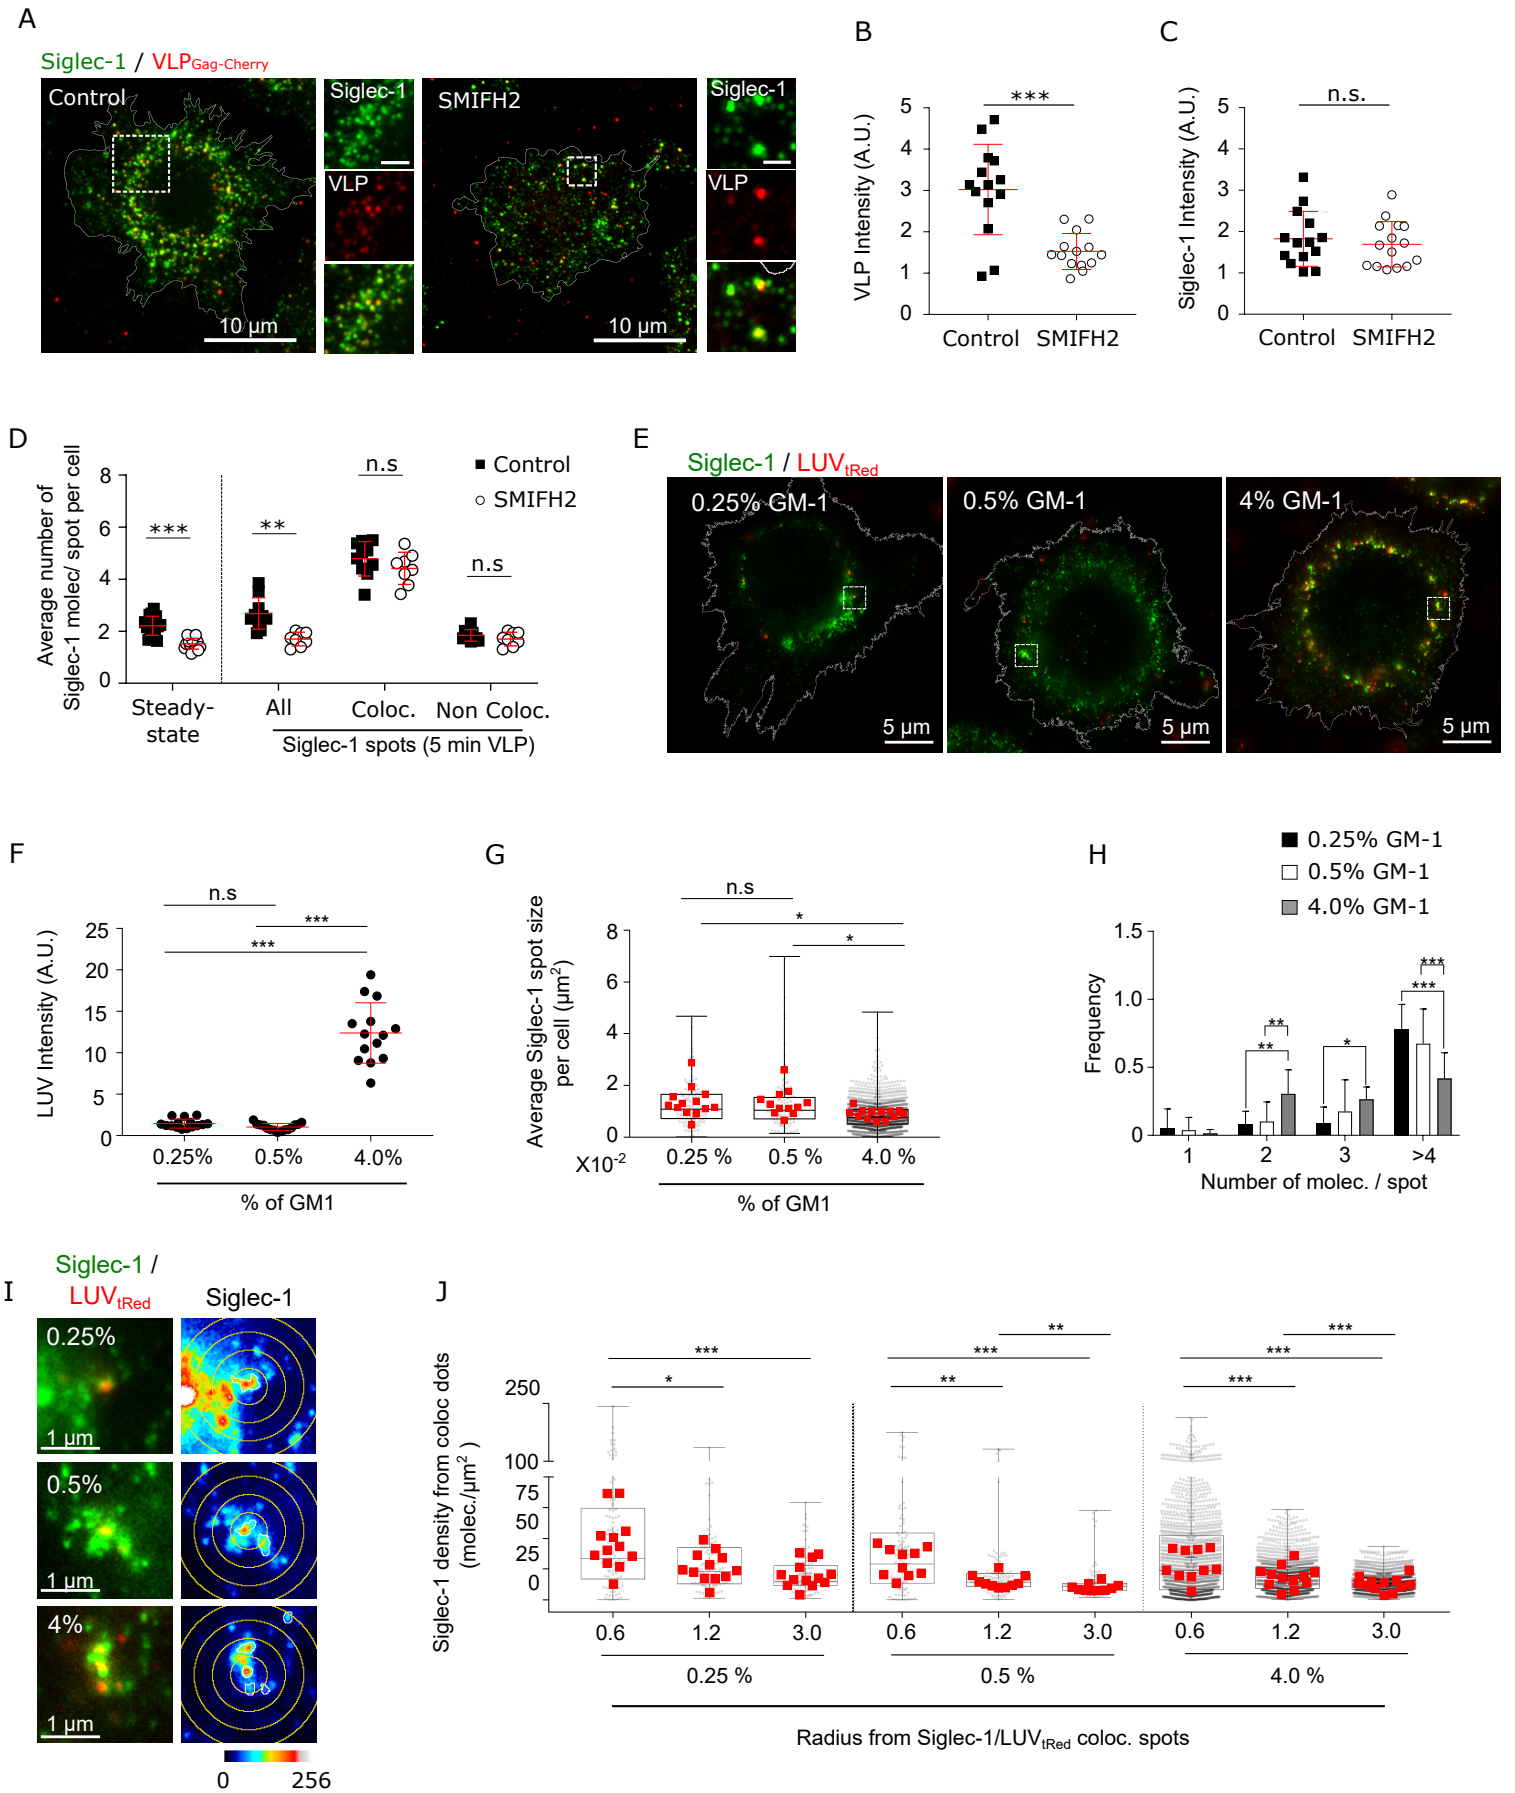

Supplement: fig4-data1 [file Figure 4.pdf › Figure 4-source data 1/Figure 4.pdf]

Figure 4-figure supplement 1

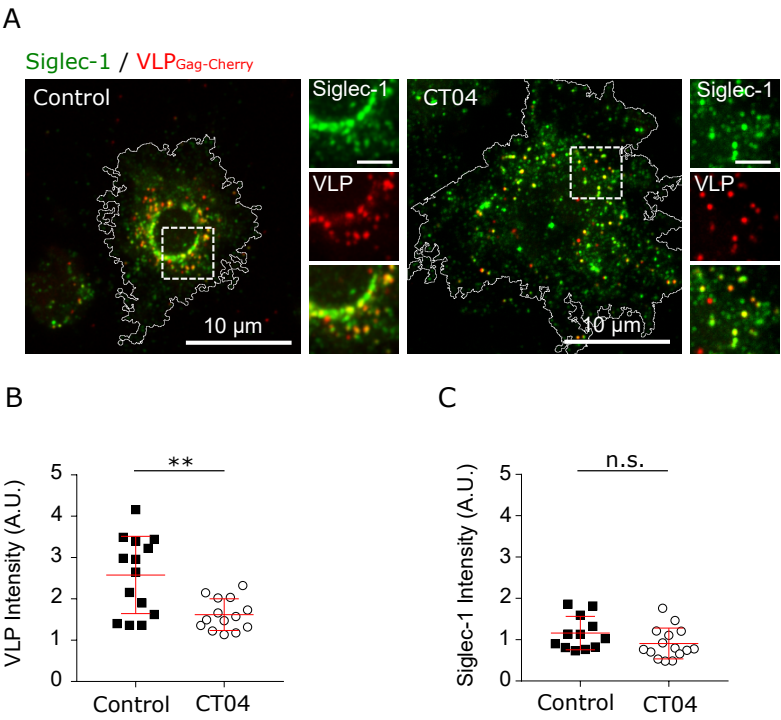

Supplement: fig4-figsupp1-data1 [file elife-78836-fig4-figsupp1-data1-v2.zip]

Figure 5

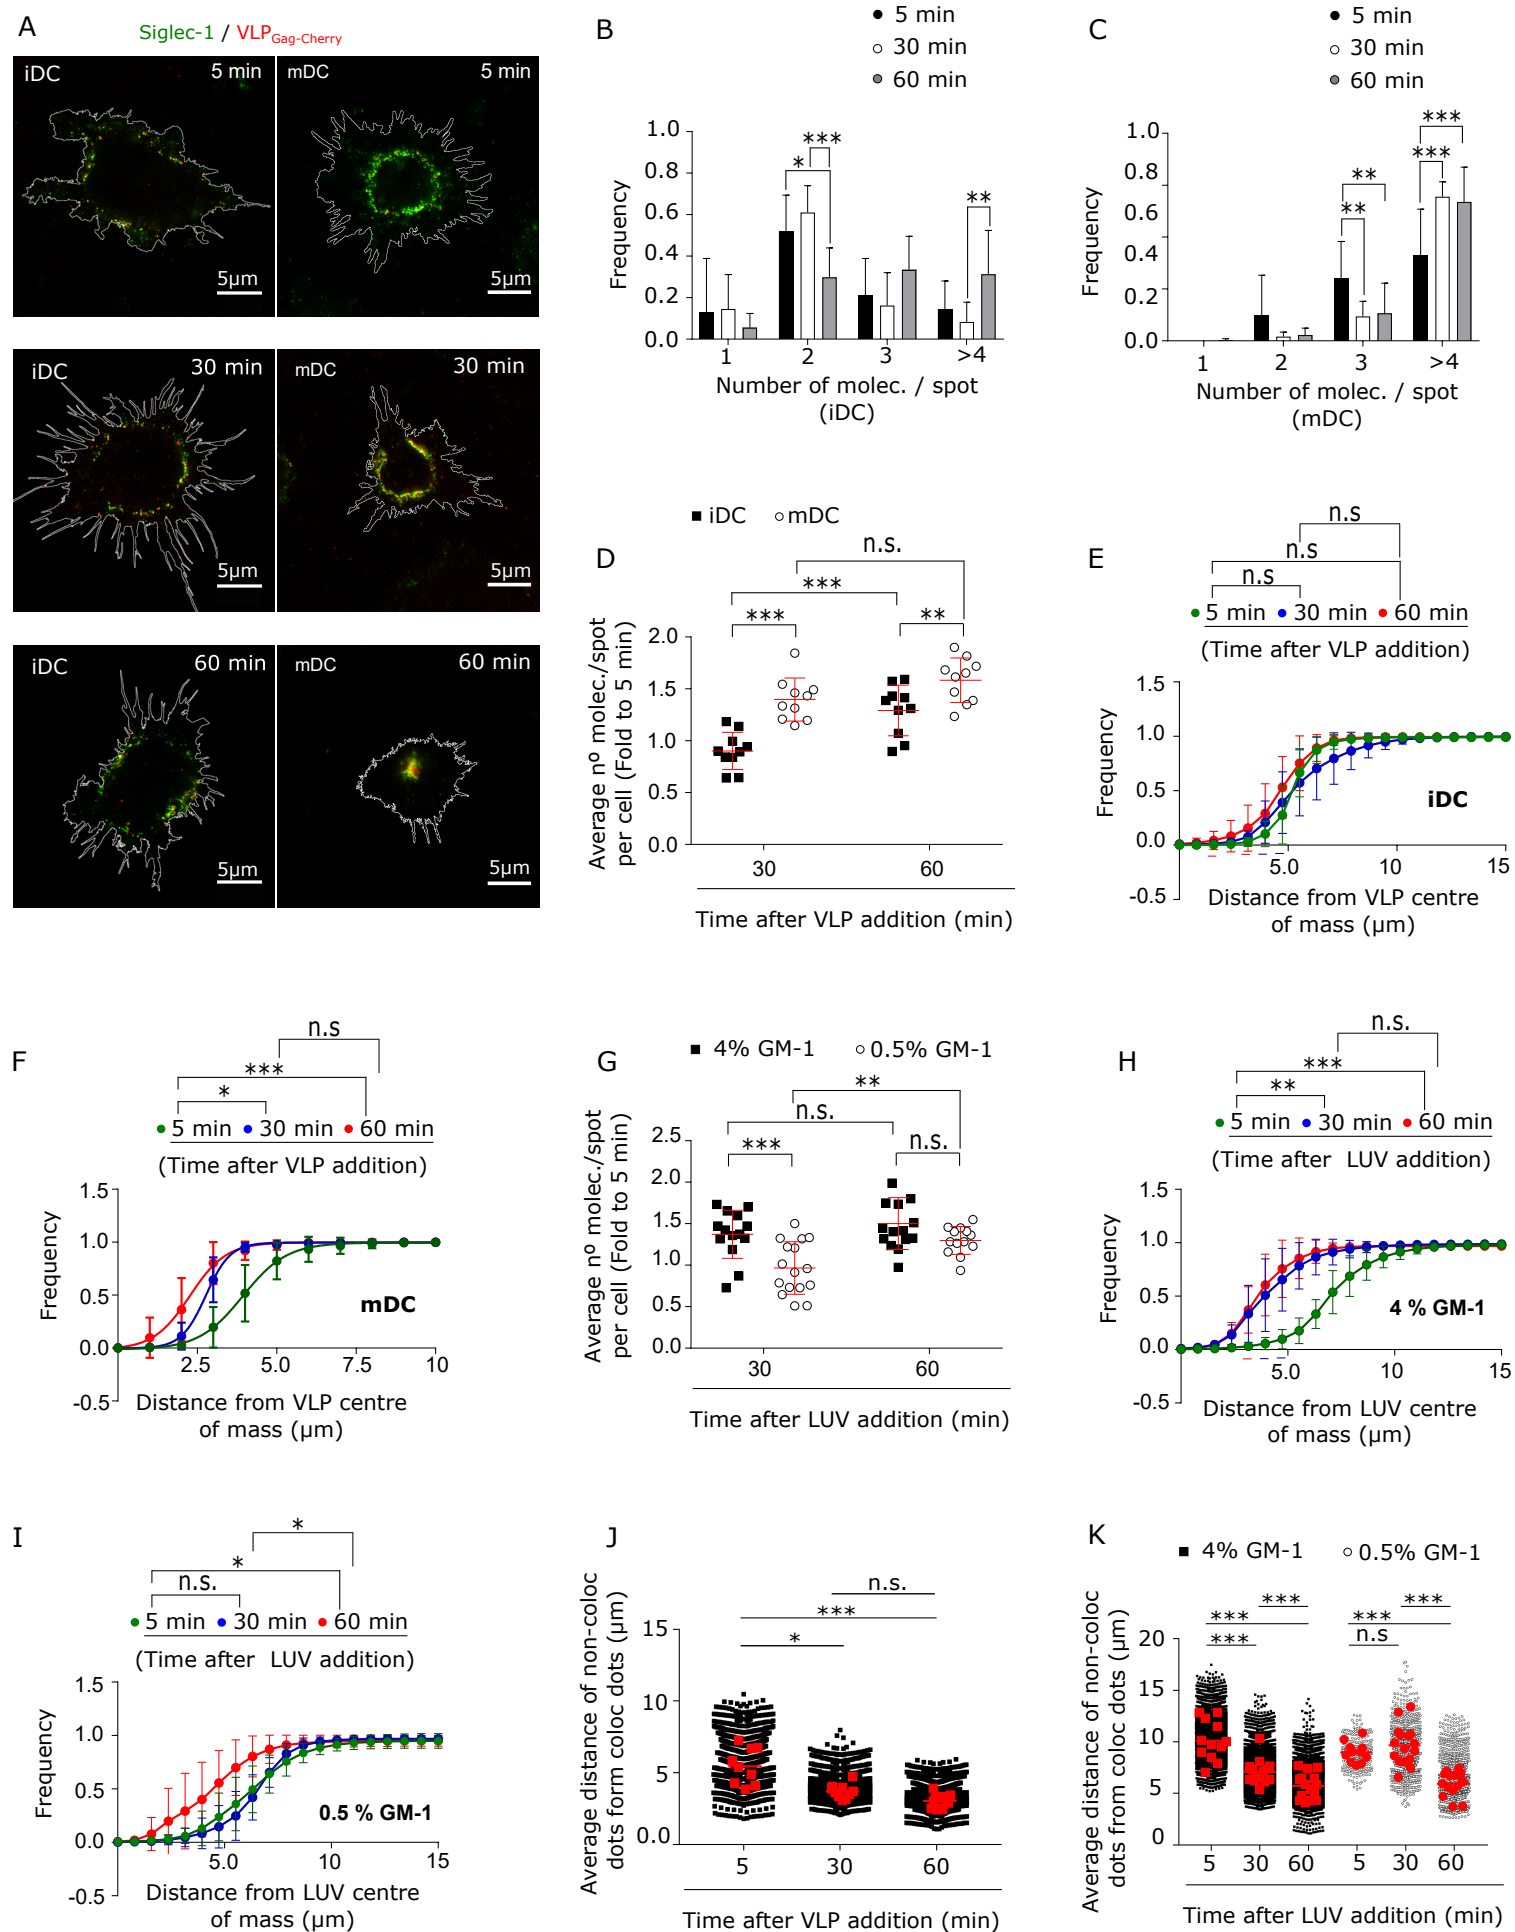

Supplement: fig5-data1 [file Figure 5.pdf › Figure 5-source data/Figure 5.pdf]

Figure 6

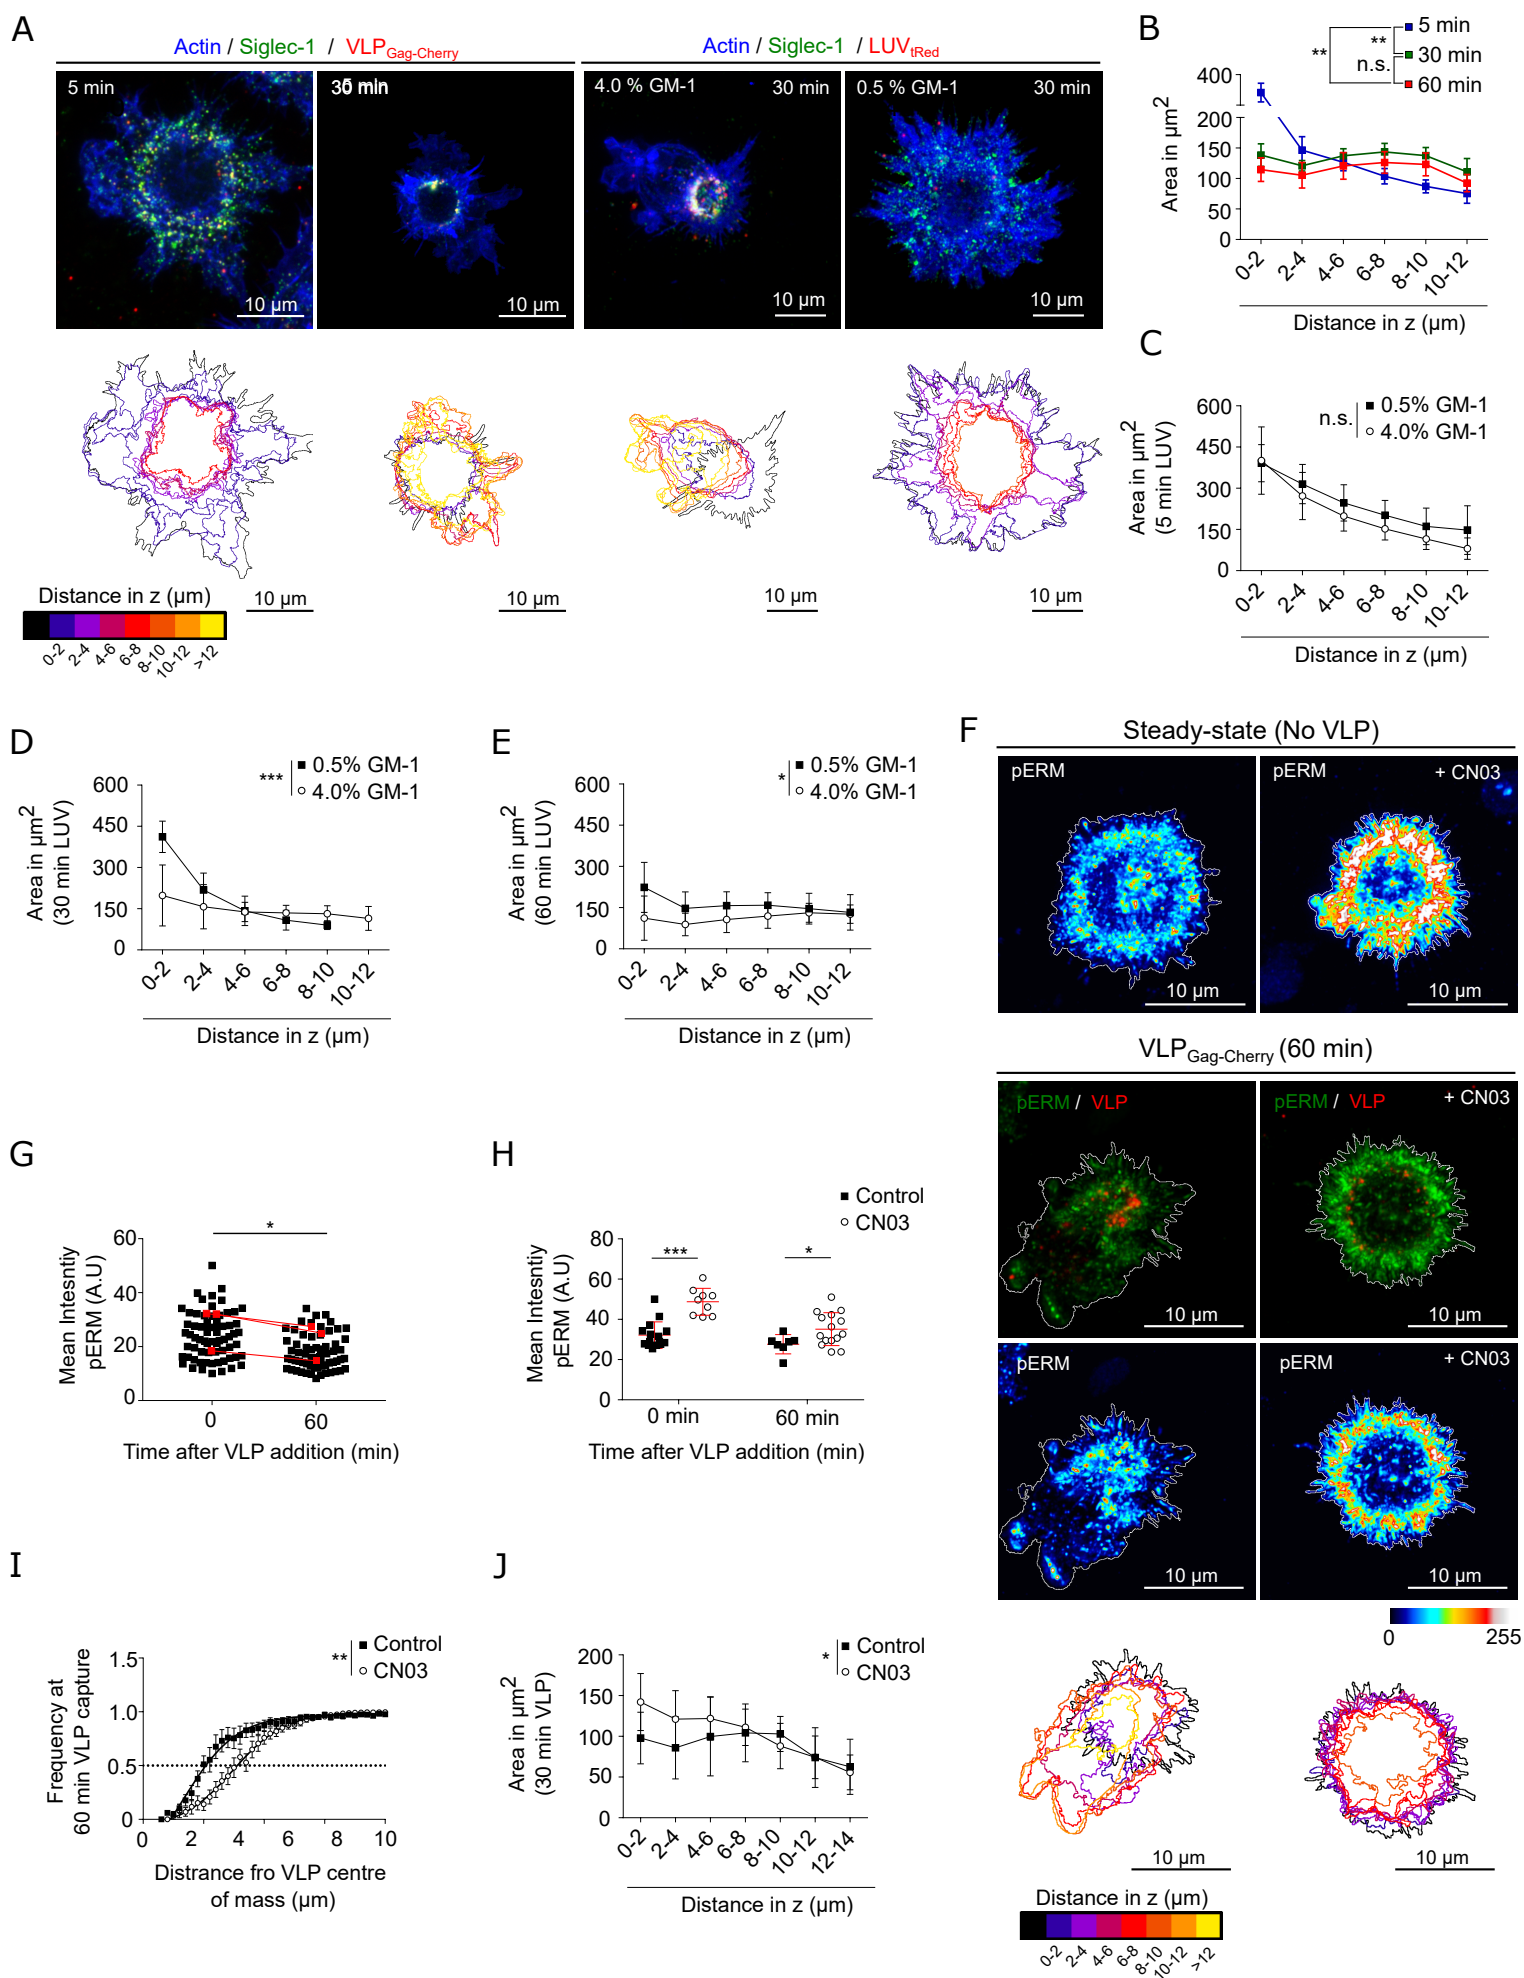

Supplement: fig6-data1 [file elife-78836-fig6-data1-v2.zip]

Figure 6-figure supplement 1

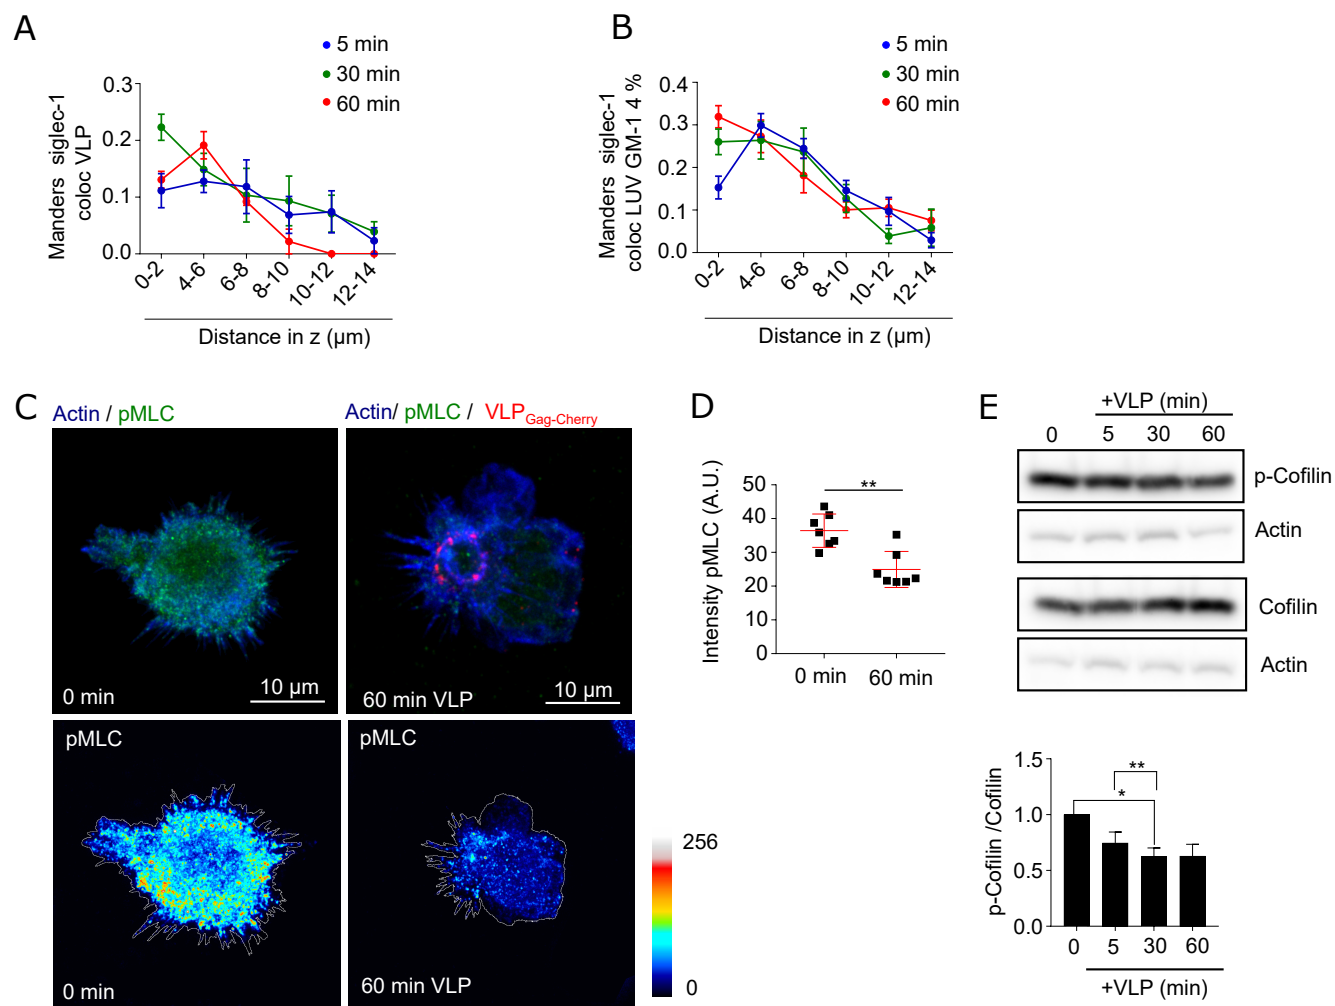

Supplement: fig6-figsupp1-data1 [file elife-78836-fig6-figsupp1-data1-v2.zip]
